# Supplementary material for: Molecular and Mechanical Signatures Contributing to Epidermal Differentiation and Barrier Formation
Source: bioRxiv preprint, doi:10.1101/2024.07.23.604736, version 2 (2025-05-06)
Supplement: Supplemental Table 1 [file 604736_file02.xlsx]

## Sheet: FPKM_BC SB E14 E16
geneID	E14_5Bc1	E14_5Bc2	E14_5Bc3	E14_5I_1	E14_5I_2	E14_5I_3	E16_5Bc1	E16_5Bc2	E16_5Bc3	E16_5Sp1	E16_5Sp2	E16_5Sp3	Gene_name	Description
ENSMUSG00000037742	7053.89	5789.04	6029.31	5170.64	5676.27	5190.25	6039.23	6528.02	6000.69	4767.37	5697.03	4883.03	Eef1a1	eukaryotic_translation_elongation_factor_1_alpha_1
ENSMUSG00000064351	3866.07	4181.35	4227.49	6847.31	4971.08	6373.47	5263.69	7496.07	4419.98	4532.65	2421.26	5238.57	mt-Co1	mitochondrially_encoded_cytochrome_c_oxidase_I
ENSMUSG00000000031	2914.56	2642.83	2805.47	4269.99	4778.81	4855.14	4653.45	4778.94	4074.28	4503.61	4630.68	4144.2	H19	H19_imprinted_maternally_expressed_transcript
ENSMUSG00000074199	214.197	155.956	154.268	4453.42	4693.61	4926.25	694.002	702.683	857.237	2997.67	2877.51	3295.93	Krtdap	keratinocyte_differentiation_associated_protein
ENSMUSG00000019761	720.416	241.669	234.48	4544.66	4404.9	4314.35	1328.4	1165.21	2603.93	12702.6	12994.7	14168.9	Krt10	keratin_10
ENSMUSG00000007892	4676.03	4503.01	4850.85	4014.75	4356.53	4444.21	4163.19	4349.39	4439.4	3380.79	3688.87	3631.4	Rplp1	ribosomal_protein_large_P1
ENSMUSG00000098178	2030.41	495.564	773.693	3449.32	3952.91	4322.94	1100.91	1076.09	546.93	6094.62	4612.49	3414.56	Yam1	YY1_associated_myogenesis_RNA_1
ENSMUSG00000064370	3140.19	3708.2	3888.45	5086.58	3800.74	4803.62	4016.04	5718.15	3806.8	3484.37	1842.93	4083.25	mt-Cytb	mitochondrially_encoded_cytochrome_b
ENSMUSG00000046834	469.204	117.295	153.939	4028.22	3737.9	3584.39	1048.15	943.726	1808.95	10212.2	10262.5	11982.8	Krt1	keratin_1
ENSMUSG00000025362	2209.58	2359.58	2355.79	3149.83	3442.25	3414	2603.85	2789.82	2429.02	2716.83	2936.66	2736.96	Rps26	ribosomal_protein_S26
ENSMUSG00000090733	1128.33	1504.13	1472.42	2946.54	3373.92	3309.94	1717.73	2042.56	1760.56	2426.18	2507.19	2539.84	Rps27	ribosomal_protein_S27
ENSMUSG00000067274	2909.49	2335.75	2536.24	2727.89	2951.46	2829.67	2836.05	3014.62	2787.58	2083.14	2482.9	2133.92	Rplp0	ribosomal_protein_large_P0
ENSMUSG00000061983	1754.53	1868.57	1785.14	2597.24	2840.36	2704.96	1803.61	2284.33	2020.43	1883.44	1939.17	2055.76	Rps12	ribosomal_protein_S12
ENSMUSG00000064341	1654.51	2991.24	3141.52	3516.28	2529.68	3230.18	2961.42	3996.54	2550.72	2668.05	1418.05	3305.73	mt-Nd1	mitochondrially_encoded_NADH_dehydrogenase_1
ENSMUSG00000004951	137.524	169.034	126.356	2390	2450.62	2445.08	94.3688	107.982	99.9139	372.94	508.982	505.025	Hspb1	heat_shock_protein_1
ENSMUSG00000019851	499.802	474.671	461.401	2257.32	2345.75	2223.31	632.666	681.123	746.405	1638.9	1687.4	1824.71	Perp	PERP_TP53_apoptosis_effector
ENSMUSG00000057863	1297.01	1526.68	1592.25	2106.74	2219.18	2256.01	1390.93	1599.52	1514.49	1599.86	1721.33	1766.79	Rpl36	ribosomal_protein_L36
ENSMUSG00000057841	2200.16	1945.09	2080.98	1878.13	2112.12	2158.52	1608.86	1956.62	1921.77	1300.87	1419.88	1477.3	Rpl32	ribosomal_protein_L32
ENSMUSG00000003970	2600.7	2410.9	2535.89	1977.63	2064.99	2026.36	2405.54	2500.09	2502.38	1818.8	2152.4	1943.16	Rpl8	ribosomal_protein_L8
ENSMUSG00000024608	2349.35	2447.55	2435.17	1851.71	2018.36	1969.78	2183.86	2593.69	2444.82	1326.19	1630.55	1446.03	Rps14	ribosomal_protein_S14
ENSMUSG00000063457	2106.02	1987.98	2120.39	1916	2013.35	1969.49	1947.31	2054.93	2170.15	1587.87	1790.44	1691.35	Rps15	ribosomal_protein_S15
ENSMUSG00000093674	1742.03	1745.66	1872.6	1764.47	1821.67	1789.56	1125.92	1532.28	1808.87	1266.02	1415.5	1389.37	Rpl41	ribosomal_protein_L41
ENSMUSG00000032399	2123.77	1715.22	1759.7	1692.18	1787.92	1670.39	1843.02	1918.23	1741.53	1408.46	1614.33	1474.9	Rpl4	ribosomal_protein_L4
ENSMUSG00000046330	1026.1	1051.82	1110.61	1591.1	1783.53	1817.3	1134.13	1229.44	1161.88	1328.36	1411.8	1377.46	Rpl37a	ribosomal_protein_L37a
ENSMUSG00000037563	1847.88	2061.87	2077.49	1701.43	1754.1	1737.84	1707.89	2009.98	2200.01	1339.79	1541.8	1392.4	Rps16	ribosomal_protein_S16
ENSMUSG00000026238	3948.93	3835.11	4231.57	1577.54	1742.78	1668.41	4111.54	4137.59	4163.05	1985.51	1952.93	1888.48	Ptma	prothymosin_alpha
ENSMUSG00000025794	1225.17	1314.11	1310.8	1470.16	1627.78	1602.17	1316.99	1465.87	1312.72	1251.68	1434.05	1328.15	Rpl14	ribosomal_protein_L14
ENSMUSG00000031320	1362.06	1373.34	1371.2	1494.33	1627.68	1574.87	1557.57	1621.6	1468.44	1307.9	1464.46	1364.7	Rps4x	ribosomal_protein_S4_X-linked
ENSMUSG00000060126	1704.99	1742.37	1813.06	1560.68	1620.03	1527.45	1923.88	2215.72	2169.62	1445.74	1664.84	1506.03	Tpt1	tumor_protein_translationally-controlled_1
ENSMUSG00000030432	1822.77	1739.18	1775.67	1567.58	1617.44	1608.22	1778.16	1755.96	1839.78	1224.22	1345.82	1263.83	Rpl28	ribosomal_protein_L28
ENSMUSG00000029580	1159.34	904.346	989.119	1507.86	1586.53	1542.03	1093.85	1166.59	1109.8	1089.39	1419.76	1055.27	Actb	actin_beta
ENSMUSG00000003429	1674.71	1941.82	1965.25	1548.14	1568.7	1549.68	1837.2	2150.4	2067.88	1171.78	1340.64	1269.64	Rps11	ribosomal_protein_S11
ENSMUSG00000064345	718.485	1945.31	2031.86	2106.22	1563.48	2001.96	1861.56	2605.18	1708.75	1803.76	960.616	2113.47	mt-Nd2	mitochondrially_encoded_NADH_dehydrogenase_2
ENSMUSG00000060962	153.305	64.8446	74.1285	1610.88	1554.94	1652.24	241.633	251.498	364.056	629.831	679.827	721.984	Dmkn	dermokine
ENSMUSG00000062328	1073.54	1057.57	1038.54	1357.87	1552.5	1573.51	1042.05	1291.05	1038.72	891.413	1035.12	984.115	Rpl17	ribosomal_protein_L17
ENSMUSG00000012848	1681.09	1547.09	1480.92	1410.11	1514.64	1449.7	1546.41	1662.59	1662.22	1077.77	1244.13	1179.31	Rps5	ribosomal_protein_S5
ENSMUSG00000061787	1471.5	1658.25	1665.56	1398.59	1503.41	1454.04	1313.15	1467.09	1633.9	1071.15	1155.17	1163.49	Rps17	ribosomal_protein_S17
ENSMUSG00000008682	1239.65	1369.76	1309.23	1389.23	1478.23	1502.54	1394.86	1495.12	1446.1	1178.54	1297.04	1275.89	Rpl10	ribosomal_protein_L10
ENSMUSG00000025290	757.715	741.9	829.342	1331.48	1462.81	1456.71	739.913	962.245	794.478	911.124	928.21	981.733	Rps24	ribosomal_protein_S24
ENSMUSG00000061527	6693.92	3810.59	3972.33	1137.59	1457.6	2007.84	15958.3	15536.5	13735	14719.3	14643.4	10846.3	Krt5	keratin_5
ENSMUSG00000034892	1110.02	1126.01	1251.85	1432.72	1422.55	1429.16	841.305	971.716	1387.28	1113.66	1086.73	1164.8	Rps29	ribosomal_protein_S29
ENSMUSG00000017404	1413.31	1263.98	1272.8	1332.33	1406.47	1353.91	1159.36	1301.74	1275.01	1077.67	1256.27	1170.77	Rpl19	ribosomal_protein_L19
ENSMUSG00000047281	415.544	364.271	336.456	1368.27	1374.23	1268.98	773.24	688.612	702.145	1482.61	1778.12	1497.47	Sfn	stratifin
ENSMUSG00000039001	900.103	1163.88	1193.68	1468.09	1371.27	1353.32	905.689	1121.72	1092.72	1059.91	1000.39	1041.05	Rps21	ribosomal_protein_S21
ENSMUSG00000032518	1737.19	1564.99	1603.77	1251.94	1371.2	1328.03	1323.59	1423.93	1419.08	896.047	1125.33	1030.1	Rpsa	ribosomal_protein_SA
ENSMUSG00000023944	2006.62	1748.68	1724.28	1314.23	1370.65	1314.16	1218.09	1198.9	1267.98	1264.09	1452.51	1315.21	Hsp90ab1	heat_shock_protein_90_alpha_(cytosolic)_class_B_member_1
ENSMUSG00000047675	1229.86	1205.42	1240.11	1277.1	1344.24	1321.83	1085.72	1263.99	1314.2	987.111	1106.18	1045.75	Rps8	ribosomal_protein_S8
ENSMUSG00000090862	996.678	994.086	1028.29	1218.43	1335.59	1304.39	997.407	1057.39	1011.9	972.961	1128.09	1033.62	Rps13	ribosomal_protein_S13
ENSMUSG00000074129	2145.87	1946.64	1965.11	1255.23	1303.23	1239.84	1697.81	2103.62	2045.94	858.527	1082.59	889.725	Rpl13a	ribosomal_protein_L13A
ENSMUSG00000025508	1069	1126.51	1161.05	1234.24	1293.73	1259.25	931.588	1040.39	1169.01	1008	1103.71	1059.72	Rplp2	ribosomal_protein_large_P2
ENSMUSG00000071415	1169.38	1081.57	1104.66	1171.03	1270.81	1221.39	1064.86	1170.61	1174.19	939.035	1024.85	948.151	Rpl23	ribosomal_protein_L23
ENSMUSG00000009927	760.3	870.4	923.627	1109.62	1243.8	1249.53	839.443	986.205	896.858	923.531	997.35	973.246	Rps25	ribosomal_protein_S25
ENSMUSG00000049517	1336.36	1312.49	1320.69	1145.9	1187.26	1172.95	1087.89	1323.81	1350.28	849.22	921.295	908.74	Rps23	ribosomal_protein_S23
ENSMUSG00000062825	600.955	609.488	545.288	1179.53	1171.96	1114.07	679.13	634.149	593.478	949.466	1249.88	969.199	Actg1	actin_gamma_cytoplasmic_1
ENSMUSG00000061477	838.112	980.66	941.706	1091.75	1170.77	1119.86	931.85	1100.03	1070.15	807.247	960.829	833.788	Rps7	ribosomal_protein_S7
ENSMUSG00000060938	881.831	472.165	909.285	973.694	1161.23	1105.38	876.171	1001.1	876.175	626.935	656.926	637.173	Rpl26	ribosomal_protein_L26
ENSMUSG00000038900	954.552	1038.32	1002.24	1051.93	1160.56	1130.6	938.415	1051.54	995.629	773.569	881.399	829.925	Rpl12	ribosomal_protein_L12
ENSMUSG00000029614	1097.83	1015.29	996.121	1092.68	1152.46	1111.3	1061.13	1151.22	967.367	934.968	1100.58	985.694	Rpl6	ribosomal_protein_L6
ENSMUSG00000028081	1090.07	1004.02	1058.04	1421.31	1151.59	962.133	975.066	1064.17	1130.22	510.111	627.424	679.539	Rps3a1	ribosomal_protein_S3A1
ENSMUSG00000051397	228.607	192.108	170.395	1120.82	1150.11	1130.67	254.842	214.704	315.077	476.317	494.048	579.005	Tacstd2	tumor-associated_calcium_signal_transducer_2
ENSMUSG00000062647	1397.27	1269.25	1345.63	1092.48	1128.66	1075.84	1281.75	1324.56	1289.74	1016.69	1140.4	1059.71	Rpl7a	ribosomal_protein_L7A
ENSMUSG00000059291	1421.4	1320.58	1443.76	1101.32	1112.81	1108	1093.07	1185.8	1321.26	918.087	1045.32	991.936	Rpl11	ribosomal_protein_L11
ENSMUSG00000044533	762.031	1592.21	1086.16	883.553	1112.42	703.654	873.037	1405.19	1083.68	843.347	728.109	1355.22	Rps2	ribosomal_protein_S2
ENSMUSG00000052146	1010.11	1015.51	1005.88	1089.09	1107.29	1063.73	961.116	1088.2	1028.11	730.014	836.02	778.569	Rps10	ribosomal_protein_S10
ENSMUSG00000011884	143.808	111.011	116.841	1127.52	1104.83	1097.59	185.828	177.463	208.413	426.125	487.332	474.048	Gltp	glycolipid_transfer_protein
ENSMUSG00000064363	548.71	977.478	1021.81	1455.04	1101.38	1438.22	1112.03	1788.53	1043.59	1059.22	595.929	1270.3	mt-Nd4	mitochondrially_encoded_NADH_dehydrogenase_4
ENSMUSG00000045128	1160	1095.84	1086.07	1009.67	1099.46	1066.6	1354.6	1377.59	1161.2	875.257	1013.49	916.303	Rpl18a	ribosomal_protein_L18A
ENSMUSG00000048758	772.579	805.596	785.312	819.443	1082.53	959.76	782.996	791.832	802.558	914.713	1282.27	847.461	Rpl29	ribosomal_protein_L29
ENSMUSG00000034994	2193.02	1552.48	1546.9	1023.63	1045.16	991.978	1773.89	1698.54	1548.34	1042.03	1156.24	1054.13	Eef2	eukaryotic_translation_elongation_factor_2
ENSMUSG00000020460	728.626	734.993	779.729	980.549	1040.19	932.83	634.819	781.009	710.646	601.4	620.616	655.398	Rps27a	ribosomal_protein_S27A
ENSMUSG00000006333	1192.13	1239.54	1168.24	972.143	1031.21	1038.24	1168.15	1299.76	1240.2	789.594	921.335	828.283	Rps9	ribosomal_protein_S9
ENSMUSG00000063316	1192.96	1237.47	1253.09	936.939	993.467	1011.17	1148.09	1327.56	1225.85	789.006	913.898	852.807	Rpl27	ribosomal_protein_L27
ENSMUSG00000000740	1274.16	1078.45	1077.78	931.162	976.499	940.062	1058.86	1115.36	1127.91	784.472	887.394	806.671	Rpl13	ribosomal_protein_L13
ENSMUSG00000038274	1211.03	1237.46	1213.87	954.037	958.426	929.783	1048.9	1222.64	1275.67	665.435	785.737	719.169	Fau	Finkel-Biskis-Reilly_murine_sarcoma_virus_(FBR-MuSV)_ubiquitously_expressed_(fox_derived)
ENSMUSG00000049775	429.07	506.938	567.172	939.825	943.868	982.617	588.727	675.928	604.287	508.639	567.968	508.648	Tmsb4x	thymosin_beta_4_X_chromosome
ENSMUSG00000057322	640.18	661.287	696.134	878.981	915.625	943.511	479.973	576.291	646.992	643.916	638.976	692.162	Rpl38	ribosomal_protein_L38
ENSMUSG00000027907	690.185	897.072	831.483	877.834	911.573	948.414	663.588	708.981	764.929	1153.71	1148.25	1123.93	S100a11	S100_calcium_binding_protein_A11_(calgizzarin)
ENSMUSG00000028495	1031.92	1088.64	1124.22	828.902	901.292	867.306	958.515	1072.01	1064.28	675.805	795.821	747.675	Rps6	ribosomal_protein_S6
ENSMUSG00000043716	806.641	756.231	768.773	851.713	900.903	839.082	755.86	852.644	788.665	703.762	838.401	745.466	Rpl7	ribosomal_protein_L7
ENSMUSG00000016559	471.983	714.609	649.798	809.502	861.694	842.862	1000.4	962.069	950.475	794.107	774.964	759.122	H3f3b	H3_histone_family_3B
ENSMUSG00000060036	1418.45	1048.89	1205.73	829.798	857.656	781.357	741.255	805.074	1104.29	713.401	809.698	731.292	Rpl3	ribosomal_protein_L3
ENSMUSG00000081684	1934.47	1910.48	1496.74	751.992	842.359	1492.05	2450.5	1852.42	2205.83	1075.71	1294.69	974.403	Rps2-ps13	ribosomal_protein_S2_pseudogene_13
ENSMUSG00000025393	1027.75	1077.37	1009.19	789.203	822.549	773.692	968.775	925.236	925.282	834.237	915.869	892.488	Atp5b	ATP_synthase_H+_transporting_mitochondrial_F1_complex_beta_subunit
ENSMUSG00000064367	997.99	956.745	983.957	1237.13	820.67	1130.51	1116.64	1640.37	1019.96	1125.32	613.813	1343.26	mt-Nd5	mitochondrially_encoded_NADH_dehydrogenase_5
ENSMUSG00000073702	921.564	895.204	974.91	780.323	811.549	818.092	821.335	927.066	1016.78	600.456	647.61	638.012	Rpl31	ribosomal_protein_L31
ENSMUSG00000037805	875.028	686.556	711.537	759.409	809.961	797.378	665.043	709.034	720.424	630.806	720.38	661.034	Rpl10a	ribosomal_protein_L10A
ENSMUSG00000079641	544.949	500.652	524.551	727.526	806.546	758.1	397.038	542.349	566.126	526.783	516.731	554.517	Rpl39	ribosomal_protein_L39
ENSMUSG00000078812	864.196	848.569	892.01	773.892	800.3	796.298	744.497	736.473	786.748	838.867	889.459	886.114	Eif5a	eukaryotic_translation_initiation_factor_5A
ENSMUSG00000060143	237.429	338.767	275.761	638.49	799.552	750.276	413.851	550.772	280.812	535.077	618.158	520.729	Gm10076	predicted_gene_10076
ENSMUSG00000053522	611.244	234.336	302.011	923.707	779.665	813.104	3304.37	3398.85	3149.87	4711.27	5082.34	4586.79	Lgals7	lectin_galactose_binding_soluble_7
ENSMUSG00000044786	284.773	252.789	157.993	799.144	748.641	627.705	977.79	822.703	1028.52	1378.72	1639.23	1013.7	Zfp36	zinc_finger_protein_36
ENSMUSG00000021250	412.855	516.471	346.965	813.473	734.261	632.695	1180.58	1112.07	1292.9	1841.24	2167.33	1322.55	Fos	FBJ_osteosarcoma_oncogene
ENSMUSG00000041841	618.474	618.779	616.183	708.781	731.287	722.571	596.817	673.999	659.76	592.85	618.501	650.409	Rpl37	ribosomal_protein_L37
ENSMUSG00000079435	494.516	510.086	512.451	642.815	705.604	699.469	499.362	592.528	516.041	531.716	588.724	560.039	Rpl36a	ribosomal_protein_L36A
ENSMUSG00000001552	316.883	203.453	224.391	703.86	697.986	681.607	368.997	340.889	400.06	769.89	802.392	802.508	Jup	junction_plakoglobin
ENSMUSG00000046364	502.007	545.74	551.707	633.753	697.068	656.9	533.24	558.364	540.51	503.972	570.308	526.031	Rpl27a	ribosomal_protein_L27A
ENSMUSG00000067288	726.5	760.045	826.695	696.016	693.457	690.979	586.307	647.613	892.798	544.936	547.462	579.359	Rps28	ribosomal_protein_S28
ENSMUSG00000064368	65.2513	416.59	507.389	1046.89	692.591	878.735	453.103	860.235	564.584	963.082	472.462	1070.67	mt-Nd6	mitochondrially_encoded_NADH_dehydrogenase_6
ENSMUSG00000090841	423.541	482.997	470.079	663.403	690.901	735.167	455.548	479.314	462.634	478.357	507.483	487.577	Myl6	myosin_light_polypeptide_6_alkali_smooth_muscle_and_non-muscle
ENSMUSG00000071644	969.873	852.058	854.015	606.481	687.401	705.384	816.356	787.475	750.946	567.942	661.507	583.088	Eef1g	eukaryotic_translation_elongation_factor_1_gamma
ENSMUSG00000008668	391.435	458.454	498.441	636.636	671.199	632.479	501.782	572.086	518.103	484.619	556.534	550.439	Rps18	ribosomal_protein_S18
ENSMUSG00000022108	301.046	269.893	268.69	685.912	651.349	629.529	343.338	346.895	400.027	877.873	907.519	1002.63	Itm2b	integral_membrane_protein_2B
ENSMUSG00000004207	302.72	257.402	235.267	645.56	650.828	647.118	355.056	335.055	360.293	503.877	462.543	558.461	Psap	prosaposin
ENSMUSG00000032231	566.411	474.752	495.884	668.182	644.517	616.78	554.805	584.993	565.574	678.616	706.868	698.946	Anxa2	annexin_A2
ENSMUSG00000056201	855.716	873.962	947.996	609.672	633.55	617.378	913.784	947.505	936.257	641.292	652.237	613.529	Cfl1	cofilin_1_non-muscle
ENSMUSG00000053560	281.311	314.843	211.957	646.284	624.015	540.377	538.205	463.605	472.182	632.581	731.916	502.352	Ier2	immediate_early_response_2
ENSMUSG00000026385	144.271	196.72	179.893	625.583	607.719	557.407	181.432	206.9	285.529	588.426	621.919	636.522	Dbi	diazepam_binding_inhibitor
ENSMUSG00000057113	702.27	851.583	880.21	576.734	591.358	524.357	573.32	622.909	597.978	543.537	603.977	602.734	Npm1	nucleophosmin_1
ENSMUSG00000054889	274.073	173.081	175.379	594.036	587.789	498.053	381.252	341.308	388.628	708.425	700.458	811.001	Dsp	desmoplakin
ENSMUSG00000057666	1083.85	1209.67	1205.91	573.647	573.955	542.182	721.766	718.957	738.77	691.329	784.309	742.734	Gapdh	glyceraldehyde-3-phosphate_dehydrogenase
ENSMUSG00000058558	501.126	503.24	520.589	537.717	569.086	525.594	436.483	549.819	534.496	368.035	465.206	390.82	Rpl5	ribosomal_protein_L5
ENSMUSG00000050953	167.638	232.924	186.386	583.148	562.761	555.648	224.214	228.659	222.868	401.149	338.648	452.787	Gja1	gap_junction_protein_alpha_1
ENSMUSG00000003545	291.511	330.615	201.941	567.406	554.028	444.119	413.206	406.318	516.61	821.216	912.381	743.838	Fosb	FBJ_osteosarcoma_oncogene_B
ENSMUSG00000038418	389.023	423.075	404.248	593.498	550.408	521.859	784.866	683.859	767.597	839.658	977.594	706.565	Egr1	early_growth_response_1
ENSMUSG00000047501	142.641	168.216	131.377	496.241	549	531.501	73.4638	65.3687	83.9774	179.552	213.624	232.711	Cldn4	claudin_4
ENSMUSG00000062006	448.904	391.153	415.76	387.447	545.471	569.208	336.11	457.18	477.336	327.617	300.508	304.74	Rpl34	ribosomal_protein_L34
ENSMUSG00000067594	14.4852	5.10636	5.76658	625.874	533.01	579.151	11.2409	17.5275	34.9896	8.239	8.74359	21.5917	Krt77	keratin_77
ENSMUSG00000033307	743.55	779.937	796.253	566.762	523.769	507.963	488.733	473.822	555.412	593.032	651.778	641.72	Mif	macrophage_migration_inhibitory_factor
ENSMUSG00000042306	98.747	46.4555	50.2302	504.761	512.146	522.347	384.549	405.726	452.659	504.294	562.315	500.766	S100a14	S100_calcium_binding_protein_A14
ENSMUSG00000074457	91.6305	81.4387	80.9032	470.079	511.274	505.827	203.09	215.312	210.505	375.632	389.825	373.489	S100a16	S100_calcium_binding_protein_A16
ENSMUSG00000052837	268.978	317.759	223.886	525.933	503.177	424.695	643.946	559.52	586.802	678.336	742.441	510.181	Junb	jun_B_proto-oncogene
ENSMUSG00000052684	299.717	264.19	167.125	580.132	503.098	381.207	744.487	639.483	774.251	1026.72	1325.51	935.658	Jun	jun_proto-oncogene
ENSMUSG00000032294	999.846	875.736	915.429	530.104	495.271	468.99	526.582	517.016	569.64	701.002	789.839	727.838	Pkm	pyruvate_kinase_muscle
ENSMUSG00000060591	304.851	367.559	344.086	480.757	495.025	511.13	250.164	231.503	257.525	196.364	185.634	193.321	Ifitm2	interferon_induced_transmembrane_protein_2
ENSMUSG00000035530	204.868	268.575	246.556	491.145	493.342	451.849	291.151	270.108	317.174	459.293	482.246	507.381	Eif1	eukaryotic_translation_initiation_factor_1
ENSMUSG00000059796	400.413	395.3	374.238	473.576	485.497	458.421	351.207	352.377	367.707	424.358	452.104	447.537	Eif4a1	eukaryotic_translation_initiation_factor_4A1
ENSMUSG00000036880	183.704	170.321	158.58	462.98	479.851	461.952	116.698	123.798	109.44	172.781	201.526	195.231	Acaa2	acetyl-Coenzyme_A_acyltransferase_2_(mitochondrial_3-oxoacyl-Coenzyme_A_thiolase)
ENSMUSG00000020719	256.799	362.114	329.019	481.568	477.632	464.26	338.803	328.986	343.811	383.765	357.298	389.895	Ddx5	DEAD_(Asp-Glu-Ala-Asp)_box_polypeptide_5
ENSMUSG00000046434	896.155	846.686	903.143	442.626	466.096	448.447	746.559	770.878	724.531	470.996	478.702	493.27	Hnrnpa1	heterogeneous_nuclear_ribonucleoprotein_A1
ENSMUSG00000027533	279.317	221.493	257.205	475.256	460.806	463.428	162.526	177.813	214.074	571.599	602.1	684.488	Fabp5	fatty_acid_binding_protein_5_epidermal
ENSMUSG00000025428	615.472	555.635	575.661	433.211	451.284	430.899	504.184	468.986	471.243	413.789	461.164	426.412	Atp5a1	ATP_synthase_H+_transporting_mitochondrial_F1_complex_alpha_subunit_1
ENSMUSG00000030744	510.999	548.666	546.603	424.367	450.42	445.177	485.432	566.126	578.873	340.494	404.082	342.25	Rps3	ribosomal_protein_S3
ENSMUSG00000041697	444.067	516.836	465.571	460.412	448.343	468.796	504.439	492.027	530.035	458.777	452.031	466.589	Cox6a1	cytochrome_c_oxidase_subunit_VIa_polypeptide_1
ENSMUSG00000030695	682.999	528.479	510.862	499.906	442.468	413.788	333.176	355.96	357.305	629.396	729.907	660.096	Aldoa	aldolase_A_fructose-bisphosphate
ENSMUSG00000063229	546.277	468.668	468.315	475.243	439.466	414.371	323.395	335.204	372.877	609.076	705.309	657.113	Ldha	lactate_dehydrogenase_A
ENSMUSG00000023004	698.045	721.715	776.192	408.376	434.31	401.381	664.989	636.574	617.133	312.503	307.772	317.749	Tuba1b	tubulin_alpha_1B
ENSMUSG00000024659	132.731	104.147	107.025	437.524	430.762	408.704	159.892	162.487	177.575	471.729	461.734	521.515	Anxa1	annexin_A1
ENSMUSG00000048583	341.929	365.539	375.051	392.764	424.935	446.276	342.734	369.66	312.668	344.979	361.122	322.744	Igf2	insulin-like_growth_factor_2
ENSMUSG00000041453	265.64	298.288	306.293	416.538	422.973	368.438	301.27	314.592	293.081	284.842	307.697	310.215	Rpl21	ribosomal_protein_L21
ENSMUSG00000000303	167.773	144.1	135.644	408.207	420.227	406.247	185.833	170.703	193.51	291.53	277.584	350.789	Cdh1	cadherin_1
ENSMUSG00000028639	1140.73	995.372	1062.28	395.021	414.998	398.618	797.181	823.131	848.184	429.955	485.514	446.541	Ybx1	Y_box_protein_1
ENSMUSG00000019505	526.834	534.616	505.291	415.027	412.529	375.799	430.189	401.804	492.297	363.371	400.029	362.244	Ubb	ubiquitin_B
ENSMUSG00000012405	349.766	409.412	394.639	389.462	410.926	385.989	376.523	397.412	378.35	309.673	360.425	323.04	Rpl15	ribosomal_protein_L15
ENSMUSG00000025967	403.587	382.89	390.054	367.174	409.804	392.679	374.697	411.035	382.94	288.14	327.278	313.065	Eef1b2	eukaryotic_translation_elongation_factor_1_beta_2
ENSMUSG00000015932	98.1347	113.162	116.745	380.784	404.494	399.139	110.79	119.776	113.659	178.223	211.501	191.543	Dstn	destrin
ENSMUSG00000033508	47.4616	19.4334	25.3197	428.345	401.161	432.596	77.0429	80.8736	90.1518	139.853	177.936	144.548	Asprv1	aspartic_peptidase_retroviral-like_1
ENSMUSG00000047215	260.153	292.226	289.643	394.23	399.793	391.013	249.043	322.539	276.805	235.925	277.097	260.282	Rpl9	ribosomal_protein_L9
ENSMUSG00000040952	366.399	424.645	437.783	384.077	397.245	400.207	413.835	476.396	438.217	266.838	292.189	282.164	Rps19	ribosomal_protein_S19
ENSMUSG00000026628	335.777	314.679	174.671	434.253	394.925	289.875	875.536	792.172	987.356	974.414	1260.43	770.771	Atf3	activating_transcription_factor_3
ENSMUSG00000030189	314.221	251.186	273.969	410.999	394.132	386.085	419.915	413.099	445.325	386.83	403.626	396.434	Ybx3	Y_box_protein_3
ENSMUSG00000023456	526.158	429.759	446.705	400.246	384.351	359.994	233.557	234.379	254.979	432.5	499.012	459.245	Tpi1	triosephosphate_isomerase_1
ENSMUSG00000059070	483.998	484.475	487.617	370.721	380.897	383.02	427.677	453.476	508.619	279.623	314.25	306.215	Rpl18	ribosomal_protein_L18
ENSMUSG00000026864	353.094	439.35	330.221	403.45	380.635	332.038	228.115	217.189	299.448	281.283	285.785	337.371	Hspa5	heat_shock_protein_5
ENSMUSG00000018585	178.526	210.863	221.713	364.31	377.568	385.902	180.95	201.374	221.198	241.46	268.024	253.429	Atox1	ATX1_(antioxidant_protein_1)_homolog_1_(yeast)
ENSMUSG00000028435	93.8928	51.6209	51.7451	388.549	376.289	352.11	180.371	187.34	210.636	365.401	333.258	407.769	Aqp3	aquaporin_3
ENSMUSG00000022283	759.639	560.975	620.056	359.056	371.959	347.117	527.127	568.821	532.989	423.9	460.597	441.915	Pabpc1	poly(A)_binding_protein_cytoplasmic_1
ENSMUSG00000008540	13.3036	17.7046	18.5217	372.503	371.884	300.303	3.3023	3.00812	3.59381	28.675	34.8504	44.2704	Mgst1	microsomal_glutathione_S-transferase_1
ENSMUSG00000035885	319.65	401.637	375.375	340.826	365.792	345.212	302.383	306.792	352.191	357.312	353.261	342.52	Cox8a	cytochrome_c_oxidase_subunit_VIIIa
ENSMUSG00000050708	580.841	736.27	912.567	403.049	364.662	329.783	702.699	710.229	817.373	155.096	90.26	107.746	Ftl1	ferritin_light_chain_1
ENSMUSG00000059751	250.996	268.114	285.606	132.58	359.552	443.963	321.736	380.395	309.493	434.304	461.651	385.993	Rps3a3	ribosomal_protein_S3A3
ENSMUSG00000027447	198.835	146.683	149.385	340.658	350.117	340.119	172.224	168.507	197.128	285.682	268.582	311.184	Cst3	cystatin_C
ENSMUSG00000026413	206.294	121.572	124.397	347.527	348.161	324.998	411.244	376.29	415.805	834.992	776.093	788.586	Pkp1	plakophilin_1
ENSMUSG00000020372	394.418	339.366	334.711	326.741	346.626	333.963	350.176	378.175	341.749	279.051	329.524	292.801	Gnb2l1	guanine_nucleotide_binding_protein_(G_protein)_beta_polypeptide_2_like_1
ENSMUSG00000036751	282.089	326.561	340.202	307.034	344.831	332.095	251.281	278.214	322.876	302.383	317.65	322.394	Cox6b1	cytochrome_c_oxidase_subunit_VIb_polypeptide_1
ENSMUSG00000020849	340.497	416.239	468.61	308.66	342.291	318.302	323.419	335.177	341.376	286.592	314.582	281.739	Ywhae	tyrosine_3-monooxygenase/tryptophan_5-monooxygenase_activation_protein_epsilon_polypeptide
ENSMUSG00000061330	128.494	152.754	91.8607	259.394	341.704	409.566	88.9808	124.604	97.159	147.019	176.876	152.748	Gm11361	predicted_pseudogene_11361
ENSMUSG00000046056	27.4256	9.64255	10.1065	394.241	336.245	341.093	33.5765	35.1786	61.4511	135.519	152.021	162.694	Sbsn	suprabasin
ENSMUSG00000047945	447.347	516.359	541.816	304.107	331.216	315.714	323.284	307.095	275.301	122.335	133.122	124.395	Marcksl1	MARCKS-like_1
ENSMUSG00000030208	130.018	126.068	118.033	310.577	328.639	314.035	213.407	197.455	218.7	348.225	334.216	370.702	Emp1	epithelial_membrane_protein_1
ENSMUSG00000068396	123.619	162.191	159.67	344.022	323.234	273.356	205.383	184.739	104.389	281.74	366.652	324.797	Rpl34-ps1	ribosomal_protein_L34_pseudogene_1
ENSMUSG00000022528	115.765	128.126	56.753	337.02	321.946	275.448	37.7811	45.0592	107.802	124.62	203.659	199.358	Hes1	hairy_and_enhancer_of_split_1_(Drosophila)
ENSMUSG00000003814	389.144	384.591	336.54	334.547	320.517	337.992	286.549	298.211	330.807	340.551	322.002	359.535	Calr	calreticulin
ENSMUSG00000008601	33.9724	20.974	16.1463	320.162	318.047	336.255	59.0617	50.2076	66.1277	266.485	273.374	290.961	Rab25	RAB25_member_RAS_oncogene_family
ENSMUSG00000039221	132.843	203.547	224.123	292.135	317.959	306.897	173.625	230.693	193.832	241.165	242.449	270.66	Rpl22l1	ribosomal_protein_L22_like_1
ENSMUSG00000020592	137.056	127.547	121.311	306.45	316.076	322.438	133.448	123.903	145.704	170.891	157.465	186.714	Sdc1	syndecan_1
ENSMUSG00000041571	541.599	651.412	640.119	314.704	315.028	316.588	521.799	505.024	518.762	366.115	379.965	361.199	Sepw1	selenoprotein_W_muscle_1
ENSMUSG00000063524	353.107	327.273	355.523	306.521	313.413	346.105	197.179	211.832	201.434	323.069	396.734	344.752	Eno1	enolase_1_alpha_non-neuron
ENSMUSG00000021660	296.903	318.257	360.009	292.694	312.46	319.207	252.362	292.157	292.754	256.513	281.499	266.327	Btf3	basic_transcription_factor_3
ENSMUSG00000023034	168.333	196.554	106.092	342.642	312.228	286.6	326.365	224.545	373.702	389.815	565.055	334.204	Nr4a1	nuclear_receptor_subfamily_4_group_A_member_1
ENSMUSG00000007836	626.131	690.596	687.42	322.997	309.001	286.967	595.219	554.685	577.103	296.851	341.964	327.064	Hnrnpa0	heterogeneous_nuclear_ribonucleoprotein_A0
ENSMUSG00000020585	128.371	141.187	132.213	303.267	305.724	319.301	112.332	119.198	110.888	132.46	127.777	140.248	Laptm4a	lysosomal-associated_protein_transmembrane_4A
ENSMUSG00000048076	225.914	236.132	239.602	297.658	303.608	300.072	194.378	185.252	190.612	226.041	237.073	227.557	Arf1	ADP-ribosylation_factor_1
ENSMUSG00000071866	370.502	417.771	425.154	289.722	299.601	292.374	403.23	428.902	400.483	390.495	411.326	390.542	Ppia	peptidylprolyl_isomerase_A
ENSMUSG00000057454	26.194	19.9114	15.4057	307.927	297.919	278.375	27.6912	24.631	45.0531	162.746	170.545	202.961	Lypd3	Ly6/Plaur_domain_containing_3
ENSMUSG00000055839	299.383	316.96	332.001	296.985	296.598	303.286	276.075	284.879	270.058	250.498	257.937	260.034	Tceb2	transcription_elongation_factor_B_(SIII)_polypeptide_2
ENSMUSG00000074227	287.369	289.803	251.365	286.136	295.258	291.802	221.305	242.934	236.512	179.378	177.817	197.891	Spint2	serine_protease_inhibitor_Kunitz_type_2
ENSMUSG00000005054	63.5119	69.4757	71.3225	285.36	294.935	276.227	54.7196	62.3591	70.0941	144.293	194.139	175.656	Cstb	cystatin_B
ENSMUSG00000038650	108.28	87.9374	86.4619	296.509	294.577	297.361	129.513	131.625	131.287	235.364	254.957	244.697	Rnh1	ribonuclease/angiogenin_inhibitor_1
ENSMUSG00000091957	739.429	8.59901	577.898	417.361	291.126	3.05441	4.56995	5.72239	12.0725	183.206	335.775	6.99004	Rps2-ps10	ribosomal_protein_S2_pseudogene_10
ENSMUSG00000031708	257.524	227.305	221.464	293.923	290.994	299.982	271.58	262.957	290.736	232.968	210.928	237.429	Tecr	trans-23-enoyl-CoA_reductase
ENSMUSG00000061518	395.286	348.899	382.514	276.26	286.979	288.448	291.375	314.016	353.779	287.87	287.514	278.62	Cox5b	cytochrome_c_oxidase_subunit_Vb
ENSMUSG00000040681	506.45	477.234	519.689	273.413	286.187	280.65	400.642	438.542	420.169	292.137	306.198	284.49	Hmgn1	high_mobility_group_nucleosomal_binding_domain_1
ENSMUSG00000028936	269.054	263.879	273.906	260.22	285.606	287.665	215.656	249.527	242.178	193.505	217.949	200.668	Rpl22	ribosomal_protein_L22
ENSMUSG00000016319	417.217	406.453	423.056	304.028	284.24	287.7	418.86	439.414	441.533	367.9	414.702	367.971	Slc25a5	solute_carrier_family_25_(mitochondrial_carrier_adenine_nucleotide_translocator)_member_5
ENSMUSG00000058600	252.344	297.553	289.898	259.183	283.632	286.345	331.328	340.716	183.675	234.518	252.818	205.656	Rpl30	ribosomal_protein_L30
ENSMUSG00000036752	216.575	228.639	228.167	293.831	283.197	304.185	262.495	245.819	225.271	251.198	260.185	281.218	Tubb4b	tubulin_beta_4B_class_IVB
ENSMUSG00000028234	286.281	252.428	255.132	260.129	281.053	271.195	248.359	271.103	266.496	202.5	220.179	216.485	Rps20	ribosomal_protein_S20
ENSMUSG00000020917	94.8386	84.775	94.3245	279.096	279.058	259.1	69.0827	60.0209	75.4798	122.019	131.825	139.08	Acly	ATP_citrate_lyase
ENSMUSG00000021546	249.641	334.357	364.415	261.37	279.013	271.807	278.938	281.006	289.577	253.072	273.684	256.058	Hnrnpk	heterogeneous_nuclear_ribonucleoprotein_K
ENSMUSG00000004980	284.402	382.804	398.573	274.204	278.9	288.987	304.322	319.275	326.255	280.466	280.139	278.294	Hnrnpa2b1	heterogeneous_nuclear_ribonucleoprotein_A2/B1
ENSMUSG00000032013	195.04	143.277	159.783	280.659	276.969	263.681	226.698	223.226	222.674	357.108	377.584	361.845	Trim29	tripartite_motif-containing_29
ENSMUSG00000025130	228.453	190.079	179.085	274.394	276.329	282.686	168.126	170.431	184.054	187.937	194.043	207.531	P4hb	prolyl_4-hydroxylase_beta_polypeptide
ENSMUSG00000033295	323.729	263.969	249.095	276.067	274.438	263.753	217.917	193.251	206.844	177.358	154.741	183.36	Ptprf	protein_tyrosine_phosphatase_receptor_type_F
ENSMUSG00000034957	101.103	93.7788	79.6336	271.651	273.691	247.095	73.6825	65.9639	76.4101	145.72	157.654	170.474	Cebpa	CCAAT/enhancer_binding_protein_(C/EBP)_alpha
ENSMUSG00000096842	1045.4	536.761	748.725	255.267	273.464	295.263	199.667	220.985	609.381	211.927	216.1	241.094	Gm10736	predicted_gene_10736
ENSMUSG00000028148	15.4338	6.70013	9.12571	292.45	272.458	293.756	21.5957	21.2825	26.373	200.823	258.31	235.614	Them5	thioesterase_superfamily_member_5
ENSMUSG00000022312	292.458	278.615	275.44	258.15	269.038	256.885	279.313	297.574	285.326	190.327	224.987	195.841	Eif3h	eukaryotic_translation_initiation_factor_3_subunit_H
ENSMUSG00000023175	248.064	228.167	207.611	265.414	267.967	253.815	214.192	211.253	200.996	251.26	261.652	275.265	Bsg	basigin
ENSMUSG00000032959	263.002	310.291	310.679	253.658	265.847	266.227	223.867	238.597	222.314	199.359	237.248	193.635	Pebp1	phosphatidylethanolamine_binding_protein_1
ENSMUSG00000030342	71.7379	110.131	98.0898	258.07	263.713	274.482	161.992	185.334	171.599	222.725	190.068	228.791	Cd9	CD9_antigen
ENSMUSG00000032348	95.9587	100.679	94.2673	251.509	262.487	254.173	61.9817	62.6893	60.5261	25.2249	40.9896	38.3928	Gsta4	glutathione_S-transferase_alpha_4
ENSMUSG00000062070	327.46	271.825	275.13	278.634	261.604	240.043	175.246	184.942	191.072	280.181	347.778	311.761	Pgk1	phosphoglycerate_kinase_1
ENSMUSG00000096210	300.175	324.06	354.951	249.148	260.043	250.182	583.595	514.405	523.804	341.917	328.934	318.049	H1f0	H1_histone_family_member_0
ENSMUSG00000021486	341.5	312.394	314.087	253.426	255.802	238.217	297.571	281.434	249.874	235.311	255.365	232.962	Prelid1	PRELI_domain_containing_1
ENSMUSG00000079523	870.953	1041.36	1121.77	232.823	255.686	284.035	676.212	718.388	655.908	221.748	195.056	191.741	Tmsb10	thymosin_beta_10
ENSMUSG00000004897	363.172	339.027	367.603	238.541	255.342	257.644	308.635	325.915	291.492	227.495	226.599	216.447	Hdgf	hepatoma-derived_growth_factor
ENSMUSG00000031818	328.967	360.201	354.841	258.427	254.055	268.727	263.774	297.245	325.467	211.471	235.093	226.249	Cox4i1	cytochrome_c_oxidase_subunit_IV_isoform_1
ENSMUSG00000030122	481.878	493.829	459.609	248.175	252.497	263.441	606.181	576.858	576.839	371.773	329.648	335.473	Ptms	parathymosin
ENSMUSG00000028333	315.967	401.484	425.397	232.149	250.444	231.768	308.044	322.927	300.156	236.89	231.42	237.759	Anp32b	acidic_(leucine-rich)_nuclear_phosphoprotein_32_family_member_B
ENSMUSG00000056612	239.862	242.472	253.75	253.078	249.232	260.824	330.634	321.515	294.506	315.325	338.054	338.526	Ppp1r14b	protein_phosphatase_1_regulatory_(inhibitor)_subunit_14B
ENSMUSG00000026796	76.6176	63.5297	56.1079	246.933	245.452	250.515	53.8715	51.2852	57.064	110.51	126.119	121.452	Fam129b	family_with_sequence_similarity_129_member_B
ENSMUSG00000052397	91.9933	86.8121	85.4255	238.319	244.967	219.741	97.0516	87.2895	114.275	194.883	219.807	232.654	Ezr	ezrin
ENSMUSG00000018770	371.186	449.966	475.133	239.814	243.955	239.125	317.469	328.773	341.822	299.986	305.094	290.78	Atp5g3	ATP_synthase_H+_transporting_mitochondrial_F0_complex_subunit_C3_(subunit_9)
ENSMUSG00000028832	479.477	496.981	541.854	215.276	243.903	219.625	530.317	545.624	518.708	171.446	172.827	165.742	Stmn1	stathmin_1
ENSMUSG00000015165	303.402	284.699	288.562	241.028	238.987	245.723	228.368	237.545	251.75	194.384	184.598	205.817	Hnrnpl	heterogeneous_nuclear_ribonucleoprotein_L
ENSMUSG00000021134	122.975	179.565	171.422	240.006	238.754	241.596	148.182	153.719	155.605	190.719	175.587	200.032	Srsf5	serine/arginine-rich_splicing_factor_5
ENSMUSG00000057278	278.212	329.048	359.087	194.139	235.722	247.79	213.178	223.476	271.743	210.372	211.636	218.714	Snrpg	small_nuclear_ribonucleoprotein_polypeptide_G
ENSMUSG00000053565	300.926	260.239	269.711	223.017	235.46	228.526	249.788	263.042	250.963	197.547	206.854	209.628	Eif3k	eukaryotic_translation_initiation_factor_3_subunit_K
ENSMUSG00000022285	134.057	137.76	154.748	217.25	234.665	218.018	135.393	142.779	135.703	207.245	228.621	210.933	Ywhaz	tyrosine_3-monooxygenase/tryptophan_5-monooxygenase_activation_protein_zeta_polypeptide
ENSMUSG00000007891	73.226	65.9953	53.2187	223.137	233.647	249.483	70.2178	65.6343	67.3375	105.01	106.146	113.609	Ctsd	cathepsin_D
ENSMUSG00000037894	647.95	731.198	764.217	228.412	233.623	238.058	459.178	472.659	609.589	245.575	254.214	260.765	H2afz	H2A_histone_family_member_Z
ENSMUSG00000005483	106.289	124.58	90.1777	219.983	232.484	221.862	144.804	122.322	155.161	197.758	242.131	165.656	Dnajb1	DnaJ_(Hsp40)_homolog_subfamily_B_member_1
ENSMUSG00000043165	104.872	16.3962	20.1359	323.694	230.459	320.049	179.309	224.578	390.767	41.7852	54.3863	90.1959	Lor	loricrin
ENSMUSG00000025980	237.059	277.591	272.018	217.585	229.264	212.367	195.632	202.037	210.959	289.55	310.557	310.742	Hspd1	heat_shock_protein_1_(chaperonin)
ENSMUSG00000054808	362.523	276.448	268.889	230.583	228.252	223.463	316.854	303.147	325.886	228.042	215.56	226.76	Actn4	actinin_alpha_4
ENSMUSG00000051695	244.035	269.113	292.179	235.922	227.674	228.167	223.724	226.423	250.238	206.932	229.481	213.314	Pcbp1	poly(rC)_binding_protein_1
ENSMUSG00000020402	187.931	183.099	192.918	236.006	227.321	211.394	168.822	171.625	167.478	193.264	224.695	208.879	Vdac1	voltage-dependent_anion_channel_1
ENSMUSG00000096768	73.0374	224.666	135.113	198.844	227.219	360.912	106.513	122.644	151.357	279.543	379.772	299.234	Erdr1	erythroid_differentiation_regulator_1
ENSMUSG00000001525	802.335	729.814	775.795	210.8	226.964	218.878	712.376	697.135	668.352	196.11	189.297	187.661	Tubb5	tubulin_beta_5_class_I
ENSMUSG00000040385	405.366	347.218	374.085	213.545	226.486	221.857	286.895	293.81	303.321	199.542	222.26	194.956	Ppp1ca	protein_phosphatase_1_catalytic_subunit_alpha_isoform
ENSMUSG00000030057	258.495	276.682	311.562	222.921	226.12	210.565	237.266	245.119	236.315	231.6	257.047	233.757	Cnbp	cellular_nucleic_acid_binding_protein
ENSMUSG00000003032	105.096	111.491	67.758	232.166	224.926	187.89	235.729	199.484	263.891	263.932	254.636	259.05	Klf4	Kruppel-like_factor_4_(gut)
ENSMUSG00000027248	193.66	223.572	208.286	216.842	223.786	223.277	206.308	207.898	216.865	216.563	213.463	229.661	Pdia3	protein_disulfide_isomerase_associated_3
ENSMUSG00000018293	378.629	374.644	407.004	223.538	221.992	240.482	290.622	320.23	347.876	208.352	210.549	210.675	Pfn1	profilin_1
ENSMUSG00000034282	38.3594	24.1189	22.6434	242.616	220.739	229.74	49.2016	50.2745	57.4321	106.668	108.39	119.453	Evpl	envoplakin
ENSMUSG00000021290	159.175	179.234	209.35	185.333	219.112	238.018	129.748	185.007	166.993	183.501	176.106	198.806	2010107E04Rik	RIKEN_cDNA_2010107E04_gene
ENSMUSG00000039457	82.4058	43.1979	42.9062	232.682	218.178	229.995	97.492	104.079	106.347	159.758	152.99	171.947	Ppl	periplakin
ENSMUSG00000063511	255.096	272.636	266.773	221.358	217.371	227.462	194.595	206.632	239.7	192.598	169.218	191.264	Snrnp70	small_nuclear_ribonucleoprotein_70_(U1)
ENSMUSG00000003072	231.727	231.333	226.526	222.828	216.751	214.676	206.313	208.1	197.867	219.46	222.675	227.927	Atp5d	ATP_synthase_H+_transporting_mitochondrial_F1_complex_delta_subunit
ENSMUSG00000040824	410.61	457.584	454.416	203.931	215.436	246.773	248.295	272.051	325.21	220.498	214.007	207.74	Snrpd2	small_nuclear_ribonucleoprotein_D2
ENSMUSG00000059005	306.373	319.072	355.143	205.925	215.052	208.464	284.365	286.192	306.174	190.795	186.829	187.259	Hnrnpa3	heterogeneous_nuclear_ribonucleoprotein_A3
ENSMUSG00000054452	304.938	295.177	290.014	218.776	214.876	206.416	220.752	216.814	218.566	176.301	181.71	175.795	Aes	amino-terminal_enhancer_of_split
ENSMUSG00000095597	135.321	160.942	158.218	214.947	210.623	200.445	160.689	139.84	92.4837	146.005	172.535	148.28	Gm6472	predicted_pseudogene_6472
ENSMUSG00000005610	210.441	217.966	237.514	195.757	209.172	195.15	191.059	189.012	198.038	192.584	214.64	199.707	Eif4g2	eukaryotic_translation_initiation_factor_4_gamma_2
ENSMUSG00000029649	128.947	162.841	158.715	205.886	208.585	211.742	131.043	137.623	140.879	139.863	150.918	145.298	Pomp	proteasome_maturation_protein
ENSMUSG00000029713	143.719	144.429	152.872	209.379	206.395	211.729	166.886	157.605	148.242	150.379	161.458	149.348	Gnb2	guanine_nucleotide_binding_protein_(G_protein)_beta_2
ENSMUSG00000054065	166.417	133.036	135.895	215.184	205.788	216.654	159.817	154.545	152.635	208.771	206.381	212.004	Pkp3	plakophilin_3
ENSMUSG00000043681	5.17425	3.49244	2.4872	193.227	203.998	211.708	17.4304	22.5254	33.9219	94.6183	98.1662	85.2943	Fam25c	family_with_sequence_similarity_25_member_C
ENSMUSG00000028367	124.16	162.254	166.507	190.789	202.812	192.701	137.069	139.61	150.973	160.638	178.28	170.711	Txn1	thioredoxin_1
ENSMUSG00000054364	50.6485	34.3871	22.4137	198.137	202.374	184.302	100.227	82.4891	94.2686	195.264	270.301	182.016	Rhob	ras_homolog_gene_family_member_B
ENSMUSG00000063856	221.469	194.047	214.166	197.416	201.213	205.062	275.933	299.635	326.959	234.655	239.561	218.396	Gpx1	glutathione_peroxidase_1
ENSMUSG00000010376	225.969	300.953	296.932	200.205	200.406	210.785	212.64	217.923	227.271	144.411	165.172	151.861	Nedd8	neural_precursor_cell_expressed_developmentally_down-regulated_gene_8
ENSMUSG00000078202	42.414	43.5324	35.2539	216.602	200.129	186.074	47.4695	48.8386	44.6686	96.7151	109.562	122.964	Nrarp	Notch-regulated_ankyrin_repeat_protein
ENSMUSG00000006699	129.502	155.033	175.516	190.031	200.022	197.2	146.046	155.585	143.469	150.833	164.25	146.589	Cdc42	cell_division_cycle_42
ENSMUSG00000032262	4.89493	4.14764	5.08911	198.387	199.015	206.29	4.31586	6.01972	9.8448	44.3348	54.3293	62.953	Elovl4	elongation_of_very_long_chain_fatty_acids_(FEN1/Elo2_SUR4/Elo3_yeast)-like_4
ENSMUSG00000039238	20.6025	19.5023	18.8544	205.184	198.682	171.42	18.5127	16.8782	26.1691	138.842	175.597	154.585	Zfp750	zinc_finger_protein_750
ENSMUSG00000015656	482.998	484.332	432.566	212.69	198.045	190.197	317.725	331.324	367.943	310.746	365.218	308.097	Hspa8	heat_shock_protein_8
ENSMUSG00000006411	20.9987	25.738	20.1644	187.211	196.424	206.879	8.19508	6.02068	11.9575	42.3858	39.1562	51.8322	Pvrl4	poliovirus_receptor-related_4
ENSMUSG00000023067	42.0238	27.9103	21.4379	211.42	196.108	173.884	95.2474	82.3979	114.377	258.108	263.023	245.528	Cdkn1a	cyclin-dependent_kinase_inhibitor_1A_(P21)
ENSMUSG00000062683	318.556	306.166	336.508	177.061	195.578	179.197	235.213	231.79	267.407	151.928	164.908	155.34	Atp5g2	ATP_synthase_H+_transporting_mitochondrial_F0_complex_subunit_C2_(subunit_9)
ENSMUSG00000020163	200.714	222.015	233.399	177.883	194.513	191.243	156.029	170.748	202.035	181.097	201.416	200.858	Uqcr11	ubiquinol-cytochrome_c_reductase_complex_III_subunit_XI
ENSMUSG00000022234	280.356	233.043	245.104	180.918	194.48	186.077	204.705	203.854	208.298	189.787	220.161	199.204	Cct5	chaperonin_containing_Tcp1_subunit_5_(epsilon)
ENSMUSG00000028692	207.701	205.143	214.963	187.572	193.785	191.082	195.134	187.937	168.927	138.044	149.872	136.921	Akr1a1	aldo-keto_reductase_family_1_member_A1_(aldehyde_reductase)
ENSMUSG00000034566	190.858	227.005	230.309	194.57	193.729	197.674	194.569	241.448	213.532	183.124	198.909	185.027	Atp5h	ATP_synthase_H+_transporting_mitochondrial_F0_complex_subunit_D
ENSMUSG00000091537	167.225	200.73	216.417	176.148	192.217	209.634	149.314	171.521	175.865	149.451	174.628	154.748	Tma7	translational_machinery_associated_7_homolog_(S._cerevisiae)
ENSMUSG00000024576	147.228	147.765	161.649	183.419	191.948	194.019	166.655	172.68	165.353	205.971	210.063	213.767	Csnk1a1	casein_kinase_1_alpha_1
ENSMUSG00000053664	211.866	212.25	224.779	186.452	191.74	143.964	236.242	196.794	212.455	256.321	227.249	252.76	Uck2	-
ENSMUSG00000055302	270.105	286.041	329.926	185.448	191.699	182.885	263.74	266.316	236.166	192.415	208.001	185.026	Mrfap1	Morf4_family_associated_protein_1
ENSMUSG00000020451	84.1342	73.6053	73.8476	177.964	191.285	195.69	93.2188	90.8463	82.3395	129.234	124.668	129.194	Limk2	LIM_motif-containing_protein_kinase_2
ENSMUSG00000006304	227.088	215.109	236.594	176.758	189.726	178.41	202.155	205.03	208.29	173.256	165.172	162.431	Arpc2	actin_related_protein_2/3_complex_subunit_2
ENSMUSG00000031765	366.672	516.649	451.859	196.214	189.404	149.595	390.676	341.114	424.317	561.929	606.342	551.233	Mt1	metallothionein_1
ENSMUSG00000072949	51.1467	55.8611	54.9374	197.199	188.587	181.693	22.6809	23.8331	19.7877	42.3802	58.2918	49.1019	Acot1	acyl-CoA_thioesterase_1
ENSMUSG00000059898	36.7518	21.8987	24.2552	183.775	188.152	159.29	107.858	103.17	114.255	298.488	278.255	326.259	Dsc3	desmocollin_3
ENSMUSG00000019433	120.315	115.478	124.318	179.874	186.951	195.84	106.102	104.434	100.846	126.914	133.16	132.832	Gipc1	GIPC_PDZ_domain_containing_family_member_1
ENSMUSG00000034024	201.927	197.136	208.438	176.399	186.774	179.817	197.535	203.591	185.995	201.332	214.095	203.468	Cct2	chaperonin_containing_Tcp1_subunit_2_(beta)
ENSMUSG00000017778	152.786	185.134	194.297	180.371	184.895	175.028	125.689	156.55	156.757	152.116	150.496	158.205	Cox7c	cytochrome_c_oxidase_subunit_VIIc
ENSMUSG00000031029	253.635	203.895	177.95	165.337	184.167	171.831	229.576	234.292	220.061	136.838	157.634	136.149	Eif3f	eukaryotic_translation_initiation_factor_3_subunit_F
ENSMUSG00000031447	98.0066	94.9696	89.7776	178.761	183.557	183.547	117.709	113.276	111.612	147.169	150.434	151.446	Lamp1	lysosomal-associated_membrane_protein_1
ENSMUSG00000032216	255.856	260.99	280.361	178.309	183.511	168.297	200.18	187.434	191.441	145.702	161.117	137.348	Nedd4	neural_precursor_cell_expressed_developmentally_down-regulated_4
ENSMUSG00000035828	59.399	78.6731	54.0111	189.772	183.486	156.977	77.6857	66.1687	90.3869	160.109	175.076	184.95	Pim3	proviral_integration_site_3
ENSMUSG00000040728	77.2287	80.619	81.873	177.038	183.262	174.154	84.9295	83.0214	84.5043	119.146	121.423	128.124	Esrp1	epithelial_splicing_regulatory_protein_1
ENSMUSG00000006932	613.939	574.098	620.519	178.463	183.261	180.016	604.302	543.043	538.605	216.195	209.915	197.494	Ctnnb1	catenin_(cadherin_associated_protein)_beta_1
ENSMUSG00000014769	180.17	166.424	173.815	172.824	183.049	197.902	153.857	172.242	155.902	140.295	156.78	143.291	Psmb1	proteasome_(prosome_macropain)_subunit_beta_type_1
ENSMUSG00000005148	104.113	71.521	66.512	174.477	182.946	160.73	135.672	111.753	157.86	274.125	275.764	280.657	Klf5	Kruppel-like_factor_5
ENSMUSG00000030536	84.5317	70.9821	71.8233	179.75	182.276	160.253	53.5722	50.1795	55.978	80.2425	82.1357	94.9532	Iqgap1	IQ_motif_containing_GTPase_activating_protein_1
ENSMUSG00000007564	196.491	185.392	193.903	168.268	181.772	167.576	171.909	160.639	162.19	153.262	170.275	153.516	Ppp2r1a	protein_phosphatase_2_regulatory_subunit_A_alpha
ENSMUSG00000030793	28.9868	20.9696	22.7152	174.613	178.721	172.843	33.6784	36.2151	35.2566	121.025	130.94	126.099	Pycard	PYD_and_CARD_domain_containing
ENSMUSG00000034993	40.8487	32.5759	35.2751	171.413	178.595	175.61	18.7301	18.0106	17.8076	32.2134	37.3462	38.594	Vat1	vesicle_amine_transport_protein_1_homolog_(T_californica)
ENSMUSG00000017144	70.4557	76.7278	53.9198	159.325	178.484	167.485	76.1654	75.9758	88.5348	127.836	142.757	120.77	Rnd3	Rho_family_GTPase_3
ENSMUSG00000066553	124.742	110.165	98.6591	157.559	178.014	133.513	167.283	132.517	65.8119	95.7842	121.934	98.6168	Gm6969	predicted_pseudogene_6969
ENSMUSG00000036438	166.982	261.333	263.885	173.434	177.457	174.582	255.325	263.372	275.577	135.968	131.754	133.754	Calm2	calmodulin_2
ENSMUSG00000005683	165.831	150.699	155.267	173.038	177.395	168.245	146.373	142.223	144.776	145.222	157.228	151.407	Cs	citrate_synthase
ENSMUSG00000040945	266.625	259.525	274.211	177.591	177.099	174.184	189.409	181.003	189.872	152.528	159.861	158.646	Rcc2	regulator_of_chromosome_condensation_2
ENSMUSG00000024922	20.292	16.5469	11.2675	173.331	177.045	162.862	14.7137	12.5267	18.5917	70.9906	85.3009	81.6037	Ovol1	OVO_homolog-like_1_(Drosophila)
ENSMUSG00000069919	68.1424	30.9973	80.7178	290.905	176.766	271.944	39.3319	10.0443	12.3999	77.5065	32.0784	63.822	Hba-a1	hemoglobin_alpha_adult_chain_1
ENSMUSG00000029541	73.0691	65.2477	56.5444	193.294	176.582	194.875	147.121	141.313	136.748	290.051	217.676	282.106	Cyp2w1	cytochrome_P450_family_2_subfamily_w_polypeptide_1
ENSMUSG00000009079	145.029	193.628	196.368	176.425	176.197	184.89	159.779	156.936	165.296	159.273	159.4	168.548	Ewsr1	Ewing_sarcoma_breakpoint_region_1
ENSMUSG00000024661	1047.98	818.248	912.012	206.46	174.322	171.044	1145.88	1200.3	1157.25	401.083	370.648	323.78	Fth1	ferritin_heavy_chain_1
ENSMUSG00000020358	499.399	475.962	534.407	163.323	174.179	179.194	375.253	389.16	444.703	193.274	204.904	193.021	Hnrnpab	heterogeneous_nuclear_ribonucleoprotein_A/B
ENSMUSG00000028745	216.649	181.205	194.638	171.982	174.169	170.155	166.435	165.677	153.845	124.69	136.559	128.925	Capzb	capping_protein_(actin_filament)_muscle_Z-line_beta
ENSMUSG00000028645	326.459	310.437	210.391	172.819	174.149	156.714	282.543	285.002	336.28	308.589	265.623	349.693	Slc2a1	solute_carrier_family_2_(facilitated_glucose_transporter)_member_1
ENSMUSG00000028792	101.742	91.1839	107.518	174.458	173.946	168.274	85.5717	93.4155	95.1619	161.916	175.276	173.332	Ak2	adenylate_kinase_2
ENSMUSG00000019179	214.952	217.088	220.554	173.378	172.661	160.132	187.925	191.827	196.833	183.278	205.443	192.648	Mdh2	malate_dehydrogenase_2_NAD_(mitochondrial)
ENSMUSG00000045573	29.0172	21.3451	21.7453	163.884	172.489	169.766	38.7152	42.1385	34.9579	23.1292	21.38	17.7391	Penk	preproenkephalin
ENSMUSG00000001175	139.022	146.8	154.169	158.156	171.638	164.75	99.6194	102.926	106.963	83.0137	90.3793	86.3884	Calm1	calmodulin_1
ENSMUSG00000042406	86.6611	100.981	88.5871	184.524	171.214	148.685	84.6907	76.2561	113.391	148.093	169.47	165.22	Atf4	activating_transcription_factor_4
ENSMUSG00000020267	201.027	254.816	251.621	158.513	171.128	183.885	205.645	225.25	221.715	162.919	168.418	152.42	Hint1	histidine_triad_nucleotide_binding_protein_1
ENSMUSG00000006728	268.342	278.137	299.96	157.409	170.78	163.889	233.715	240.735	236.267	142.305	147.183	137.722	Cdk4	cyclin-dependent_kinase_4
ENSMUSG00000045983	216.574	211.093	225.877	166.018	170.722	165.566	196.119	183.429	190.937	178.116	183.595	187.03	Eif4g1	eukaryotic_translation_initiation_factor_4_gamma_1
ENSMUSG00000073676	189.338	319.232	328.908	157.705	170.663	162.829	191.436	226.473	224.394	191.499	198.754	192.903	Hspe1	heat_shock_protein_1_(chaperonin_10)
ENSMUSG00000015092	150.454	151.242	169.279	161.968	168.19	164.147	138.792	144.208	149.478	142.054	150.335	134.661	Edf1	endothelial_differentiation-related_factor_1
ENSMUSG00000018042	173.507	153.503	168.692	168.637	167.779	159.7	101.017	91.0284	103.665	84.2328	83.4219	85.8311	Cyb5r3	cytochrome_b5_reductase_3
ENSMUSG00000066809	126.869	142.384	106.031	173.84	167.567	177.414	135.998	166.877	128.448	126.639	132.171	125.788	Gm10180	predicted_gene_10180
ENSMUSG00000029430	236.441	266.365	294.948	163.225	167.542	164.945	204.961	218.055	222.383	172.698	199.847	185.614	Ran	RAN_member_RAS_oncogene_family
ENSMUSG00000026341	142.54	141.56	155.738	163.759	166.753	166.019	146.125	146.349	151.881	166.065	178.032	165.995	Actr3	ARP3_actin-related_protein_3
ENSMUSG00000041560	393.143	322.742	326.654	164.35	166.231	162.82	391.063	394.816	326.977	204.441	215.8	197.932	Gltscr2	glioma_tumor_suppressor_candidate_region_gene_2
ENSMUSG00000024740	284.898	229.891	259.862	157.979	166.193	159.42	211.29	208.875	208.549	174.383	192.491	171.088	Ddb1	damage_specific_DNA_binding_protein_1
ENSMUSG00000025651	259.13	214.763	207.646	163.8	165.669	165.811	297.361	298.27	270.419	263.68	267.918	280.61	Uqcrc1	ubiquinol-cytochrome_c_reductase_core_protein_1
ENSMUSG00000028063	161.891	96.1285	94.6934	167.688	164.516	162.584	322.47	298.889	324.028	316.42	306.912	299.597	Lmna	lamin_A
ENSMUSG00000020737	161.115	142.735	164.099	150.635	164.422	152.743	152.938	148.853	127.768	101.198	91.6969	100.939	Hn1	hematological_and_neurological_expressed_sequence_1
ENSMUSG00000008683	128.034	116.006	128.024	143.508	164.139	158.121	107.96	126.458	120.478	107.033	123.762	115.78	Rps15a	ribosomal_protein_S15A
ENSMUSG00000025351	143.9	150.57	140.749	156.757	163.635	166.171	92.8439	103.403	103.831	101.976	107.49	106.398	Cd63	CD63_antigen
ENSMUSG00000042079	141.23	159.259	181.823	151.494	163.431	160.36	176.095	180.626	153.715	162.17	172.159	154.901	Hnrnpf	heterogeneous_nuclear_ribonucleoprotein_F
ENSMUSG00000036371	174.128	142.304	165.401	158.317	162.997	154.013	133.465	146.298	148.053	156.657	163.269	155.911	Serbp1	serpine1_mRNA_binding_protein_1
ENSMUSG00000029447	197.324	200.871	218.853	153.554	161.717	156.996	163.019	177.286	171.245	183.781	211.345	179.99	Cct6a	chaperonin_containing_Tcp1_subunit_6a_(zeta)
ENSMUSG00000024096	97.9652	89.179	92.2335	159.074	161.675	157.35	95.9188	95.035	93.2565	106.267	114.653	112.488	Ralbp1	ralA_binding_protein_1
ENSMUSG00000030654	155.15	159.173	137.903	154.292	161.429	166.284	155.698	149.254	150.259	102.164	89.0594	108.094	Arl6ip1	ADP-ribosylation_factor-like_6_interacting_protein_1
ENSMUSG00000020423	103.611	98.4097	69.0331	175.993	161.175	126.943	201.198	181.673	202.793	287.997	505.263	199.096	Btg2	B_cell_translocation_gene_2_anti-proliferative
ENSMUSG00000046865	325.589	322.727	355.173	153.179	161.108	152.244	230.357	231.046	266.049	205.372	216.683	220.19	Fbl	fibrillarin
ENSMUSG00000028691	105.332	134.534	135.496	148.585	160.527	154.621	108.85	116.13	106.972	135.198	150.955	134.236	Prdx1	peroxiredoxin_1
ENSMUSG00000028964	278.297	293.812	295.715	145.411	160.439	166.135	241.007	243.439	237.972	195.888	215.814	192.298	Park7	Parkinson_disease_(autosomal_recessive_early_onset)_7
ENSMUSG00000054717	226.244	281.938	285.322	159.947	160.185	153.046	218.543	227.958	234.366	122.923	129.728	135.195	Hmgb2	high_mobility_group_box_2
ENSMUSG00000007815	151.72	137.122	152.79	151.055	160.14	154.761	146.753	155.956	144.643	147.043	168.412	152.487	Rhoa	ras_homolog_gene_family_member_A
ENSMUSG00000060860	228.927	268.014	243.701	148.754	159.469	151.736	215.318	194.322	236.095	153.894	175.788	168.432	Ube2s	ubiquitin-conjugating_enzyme_E2S
ENSMUSG00000028062	93.2952	114.184	114.391	154.315	159.366	153.164	104.439	95.0071	106.593	116.185	124.7	123.546	Lamtor2	late_endosomal/lysosomal_adaptor_MAPK_and_MTOR_activator_2
ENSMUSG00000080921	110.882	90.3116	96.2373	134.892	158.995	154.798	89.3453	93.7017	91.6681	108.366	94.6233	94.2857	Rpl38-ps2	ribosomal_protein_L38_pseudogene_2
ENSMUSG00000078144	9.27074	3.34939	5.01814	157.264	158.19	141.439	16.1935	13.5944	14.7574	60.6176	50.2593	57.3296	Capns2	calpain_small_subunit_2
ENSMUSG00000030747	8.69462	7.35414	6.15359	165.687	157.938	155.244	5.01255	5.43204	13.3113	18.0902	23.472	27.4917	Dgat2	diacylglycerol_O-acyltransferase_2
ENSMUSG00000025085	33.158	30.26	27.7887	149.734	157.021	151.591	18.3761	18.2217	20.5633	49.0866	55.136	56.4173	Ablim1	actin-binding_LIM_protein_1
ENSMUSG00000035242	268.936	295.14	290.654	157.168	156.401	154.521	210.303	222.421	253.033	155.322	171.843	167.465	Oaz1	ornithine_decarboxylase_antizyme_1
ENSMUSG00000029632	192.373	205.117	217.291	140.464	155.64	161.347	131.383	154.808	161.963	123.227	127.61	122.353	Ndufa4	NADH_dehydrogenase_(ubiquinone)_1_alpha_subcomplex_4
ENSMUSG00000020440	177.658	155.695	167.129	151.763	155.212	159.9	148.096	160.779	160.594	135.476	133.67	135.904	Arf5	ADP-ribosylation_factor_5
ENSMUSG00000022336	110.709	132.146	150.34	146.348	154.593	150.23	141.465	162.663	146.603	129.541	137.079	135.331	Eif3e	eukaryotic_translation_initiation_factor_3_subunit_E
ENSMUSG00000062312	59.4254	57.0776	49.0989	154.058	154.101	151.568	47.3713	44.3544	48.8405	82.5139	71.1801	90.131	Erbb2	v-erb-b2_erythroblastic_leukemia_viral_oncogene_homolog_2_neuro/glioblastoma_derived_oncogene_homolog_(avian)
ENSMUSG00000003955	389.527	272.443	303.475	185.911	153.952	129.103	431.584	477.423	538.869	569.449	674.085	645.729	Fam162a	family_with_sequence_similarity_162_member_A
ENSMUSG00000031799	76.8016	72.7898	74.0102	144.447	153.87	149.075	74.3439	74.4016	77.0166	86.7031	94.1067	84.7928	Tpm4	tropomyosin_4
ENSMUSG00000090877	41.5804	34.9718	28.1662	141.025	153.721	122.301	46.6325	41.3292	56.5747	118.756	107.544	100.088	Hspa1b	heat_shock_protein_1B
ENSMUSG00000066551	252.852	321.024	321.776	143.797	153.708	154.098	347.53	365.277	328.793	163.214	171.841	167.403	Hmgb1	high_mobility_group_box_1
ENSMUSG00000033020	172.36	217.728	251.639	179.535	153.281	146.377	155.407	150.51	203.563	158.245	160.431	166.291	Polr2f	polymerase_(RNA)_II_(DNA_directed)_polypeptide_F
ENSMUSG00000009013	109.649	127.276	120.749	149.856	153.017	149.061	116.234	114.212	133.303	144.638	144.813	148.295	Dynll1	dynein_light_chain_LC8-type_1
ENSMUSG00000046711	449.729	474.096	478.705	152.788	152.676	137.713	337.242	319.019	320.674	137.703	153.445	151.716	Hmga1	high_mobility_group_AT-hook_1
ENSMUSG00000036309	140.694	145.464	158.292	146.738	152.329	146.313	121.318	150.174	118.651	120.85	137.742	122.801	Skp1a	S-phase_kinase-associated_protein_1A
ENSMUSG00000040731	241.687	223.217	255.934	152.136	152.096	154.199	204.711	208.295	190.223	144.022	150.474	138.764	Eif4h	eukaryotic_translation_initiation_factor_4H
ENSMUSG00000018286	225.414	216.748	233.473	143.238	151.196	157.527	158.137	169.534	182.25	118.637	125.558	122.411	Psmb6	proteasome_(prosome_macropain)_subunit_beta_type_6
ENSMUSG00000028820	171.951	222.234	230.837	148.399	151.177	154.847	155.869	147.689	167.974	128.473	135.122	135.592	Sfpq	splicing_factor_proline/glutamine_rich_(polypyrimidine_tract_binding_protein_associated)
ENSMUSG00000024387	106.04	98.8205	104.751	145.347	150.517	146.234	99.2623	92.0624	104.158	103.049	113.768	111.509	Csnk2b	casein_kinase_2_beta_polypeptide
ENSMUSG00000024359	214.929	198.523	207.948	148.923	150.274	143.598	176.888	171.694	169.037	168.679	177.852	178.009	Hspa9	heat_shock_protein_9
ENSMUSG00000004864	65.9716	57.8661	62.7311	149.338	150.232	163.439	64.3039	62.424	68.1923	104.234	104.13	116.814	Mapk13	mitogen-activated_protein_kinase_13
ENSMUSG00000032012	56.1642	66.554	61.0393	142.604	149.571	137.379	39.3603	36.0409	43.7783	79.1258	75.1782	90.8481	Pvrl1	poliovirus_receptor-related_1
ENSMUSG00000033047	192.908	150.9	173.15	142.274	149.537	138.71	143.493	147.544	144.181	130.692	136.995	131.438	Eif3l	eukaryotic_translation_initiation_factor_3_subunit_L
ENSMUSG00000038467	101.352	101.583	107.255	144.733	149.372	161.25	95.4645	89.9441	92.6516	125.089	145.262	139.074	Chmp4b	charged_multivesicular_body_protein_4B
ENSMUSG00000001924	201.583	165.414	183.737	150.417	149.297	147.885	159.553	156.525	172.949	150.003	166.314	155.501	Uba1	ubiquitin-like_modifier_activating_enzyme_1
ENSMUSG00000031311	253.895	254.76	276.193	140.243	149.178	147.572	238.239	237.555	225.159	140.727	138.886	128.452	Nono	non-POU-domain-containing_octamer_binding_protein
ENSMUSG00000020476	62.5317	59.1661	62.2575	149.332	148.982	159.386	51.6746	54.5679	52.0212	65.725	69.8071	70.1837	Dbnl	drebrin-like
ENSMUSG00000005161	228.773	239.107	249.981	150.44	148.055	155.637	180.731	193.89	188.538	113.988	119.37	113.044	Prdx2	peroxiredoxin_2
ENSMUSG00000038690	140.233	164.126	160.452	143.937	147.698	150.344	127.468	147.449	136.969	142.643	150.322	140.944	Atp5j2	ATP_synthase_H+_transporting_mitochondrial_F0_complex_subunit_F2
ENSMUSG00000058655	232.484	197.941	204.299	144.418	147.265	138.035	199.762	198.293	186.339	149.23	158.52	150.678	Eif4b	eukaryotic_translation_initiation_factor_4B
ENSMUSG00000024844	229.567	245.695	248.84	134.781	147.139	147.449	198.542	192.008	228.414	142.566	150.68	148.277	Banf1	barrier_to_autointegration_factor_1
ENSMUSG00000019370	254.61	182.424	223.207	139.291	147.016	140.34	142.35	138.018	132.229	89.0645	99.672	92.5628	Calm3	calmodulin_3
ENSMUSG00000049751	186.403	199.069	220.691	142.807	146.83	147.72	164.804	183.864	198.451	150.402	166.194	162.676	Rpl36al	ribosomal_protein_L36A-like
ENSMUSG00000042043	100.116	139.392	155.344	147.614	146.537	145.801	94.9406	109.47	115.063	117.427	115.801	123.741	Tbca	tubulin_cofactor_A
ENSMUSG00000025364	172.307	156.229	182.906	150.372	146.523	148.497	135.623	137.177	139.186	177.033	188.341	190.538	Pa2g4	proliferation-associated_2G4
ENSMUSG00000007850	121.575	179.834	174.865	142.003	146.168	151.598	122.609	132.076	140.268	117.344	107.272	120.067	Hnrnph1	heterogeneous_nuclear_ribonucleoprotein_H1
ENSMUSG00000022956	169.129	156.935	169.584	158.198	146.077	148.426	116.93	138.518	133.099	136.483	146.676	141.626	Atp5o	ATP_synthase_H+_transporting_mitochondrial_F1_complex_O_subunit
ENSMUSG00000030435	208.221	244.833	258.234	144.674	145.985	153.616	192.478	183.336	201.34	154.373	151.831	154.906	U2af2	U2_small_nuclear_ribonucleoprotein_auxiliary_factor_(U2AF)_2
ENSMUSG00000001847	171.29	186.185	196.3	148.793	145.931	142.417	177.955	176.589	183.433	144.017	149.63	149.678	Rac1	RAS-related_C3_botulinum_substrate_1
ENSMUSG00000023150	60.5914	77.5877	76.448	147.718	145.695	132.016	77.2303	83.6393	82.3559	159.56	145.2	179.983	Ivns1abp	influenza_virus_NS1A_binding_protein
ENSMUSG00000002985	60.9896	55.9395	49.3112	204.902	145.063	156.433	206.646	201.487	213.128	67.1963	45.1127	54.1247	Apoe	apolipoprotein_E
ENSMUSG00000027620	81.4354	129.546	128.111	147.149	145.021	147.384	92.0288	95.2682	92.1879	118.335	114.265	124.207	Rbm39	RNA_binding_motif_protein_39
ENSMUSG00000024048	131.217	182.501	188.47	139.433	144.435	157.017	140.767	145.78	164.651	128.92	137.795	129.64	Myl12a	myosin_light_chain_12A_regulatory_non-sarcomeric
ENSMUSG00000025223	154.518	187.706	153.963	153.901	144.282	159.19	201.332	201.635	205.892	155.188	129.754	157.401	Ldb1	LIM_domain_binding_1
ENSMUSG00000070493	130.413	144.849	141.23	143.035	144.003	141.663	149.279	152.856	132.096	144.323	156.932	138.633	Chchd2	coiled-coil-helix-coiled-coil-helix_domain_containing_2
ENSMUSG00000006373	124.743	131.325	117.052	139.604	143.462	135.265	95.5268	96.9628	98.5194	90.0203	104.509	102.836	Pgrmc1	progesterone_receptor_membrane_component_1
ENSMUSG00000038717	162.928	174.854	181.906	146.486	143.387	158.77	141.348	176.377	169.163	124.07	124.781	124.303	Atp5l	ATP_synthase_H+_transporting_mitochondrial_F0_complex_subunit_G
ENSMUSG00000031422	97.1726	141.727	140.295	141.398	143.306	143.19	107.246	111.731	118.39	127.483	127.395	124.528	Morf4l2	mortality_factor_4_like_2
ENSMUSG00000084128	45.511	46.745	45.4584	152.348	143.25	159.466	43.5836	39.4771	44.7943	126.292	113.312	133.78	Esrp2	epithelial_splicing_regulatory_protein_2
ENSMUSG00000059534	170.146	222.037	224.147	133.233	143.192	145.661	142.248	159.863	169.861	140.421	151.002	143.986	Uqcr10	ubiquinol-cytochrome_c_reductase_complex_III_subunit_X
ENSMUSG00000044627	116.73	146.507	153.024	143.158	142.834	155.187	96.4295	109.577	103.503	97.1223	105.9	94.0283	Swi5	SWI5_recombination_repair_homolog_(yeast)
ENSMUSG00000028749	9.77754	5.72959	5.76345	152.407	142.275	161.02	8.33277	9.76089	15.4072	42.1374	53.617	49.2564	Pla2g2f	phospholipase_A2_group_IIF
ENSMUSG00000023010	110.58	98.4151	92.3937	143.327	142.237	140.766	93.4264	91.8367	94.0547	99.4996	102.253	105.579	Tmbim6	transmembrane_BAX_inhibitor_motif_containing_6
ENSMUSG00000022468	25.1817	16.9903	16.055	139.61	142.229	158.867	28.9589	23.5022	42.0076	151.171	141.759	152.476	Endou	endonuclease_polyU-specific
ENSMUSG00000026750	192.152	167.059	177.105	138.185	142.162	148.15	148.576	152.368	148.235	119.259	135.666	124.978	Psmb7	proteasome_(prosome_macropain)_subunit_beta_type_7
ENSMUSG00000022884	60.4821	129.736	100.447	150.142	142.05	148.969	74.2658	85.2669	99.6354	140.249	128.143	145.152	Eif4a2	eukaryotic_translation_initiation_factor_4A2
ENSMUSG00000040734	79.1238	74.4459	74.8602	149.917	141.961	154.55	73.6968	69.2216	80.4404	99.5869	107.556	112.113	Ppp1r13l	protein_phosphatase_1_regulatory_(inhibitor)_subunit_13_like
ENSMUSG00000022391	126.112	106.825	110.926	130.703	141.945	127.024	97.3127	97.8206	111.827	99.0485	113.739	106.407	Rangap1	RAN_GTPase_activating_protein_1
ENSMUSG00000032249	215.285	238.465	265.245	133.568	141.855	132.164	177.383	176.311	187.105	105.35	110.046	106.774	Anp32a	acidic_(leucine-rich)_nuclear_phosphoprotein_32_family_member_A
ENSMUSG00000030120	232.185	236.994	240.654	136.885	141.739	150.916	224.824	215.769	214.091	135.872	140.787	136.07	Mlf2	myeloid_leukemia_factor_2
ENSMUSG00000050335	16.861	6.37943	5.64958	162.162	141.347	133.22	77.3596	76.2743	82.8221	480.212	520.117	487.426	Lgals3	lectin_galactose_binding_soluble_3
ENSMUSG00000041959	267.289	266.629	275.916	118.622	141.225	143.09	404.663	463.189	439.534	388.61	388.82	378.598	S100a10	S100_calcium_binding_protein_A10_(calpactin)
ENSMUSG00000063882	142.321	155.237	152.597	135.111	141.215	139.333	114.924	143.986	139.217	108.156	126.067	114.324	Uqcrh	ubiquinol-cytochrome_c_reductase_hinge_protein
ENSMUSG00000025132	240.034	210.443	244.161	136.123	140.996	150.082	252.016	240.716	229.791	158.974	154.257	150.381	Arhgdia	Rho_GDP_dissociation_inhibitor_(GDI)_alpha
ENSMUSG00000069441	10.8135	6.21343	6.84431	141.576	140.945	133.9	34.1678	33.2142	43.5182	184.713	164.222	194.025	Dsg1a	desmoglein_1_alpha
ENSMUSG00000062867	208.234	186.788	189.393	142.543	140.607	138.265	167.096	173.628	159.042	174.025	181.865	184.097	Impdh2	inosine_5'-phosphate_dehydrogenase_2
ENSMUSG00000005779	199.681	168.346	188.159	143.381	140.343	143.243	151.295	137.869	142.478	130.615	153.899	146.911	Psmb4	proteasome_(prosome_macropain)_subunit_beta_type_4
ENSMUSG00000051223	100.172	120.906	137.83	135.342	140.274	133.852	126.518	129.8	132.634	172.62	192.303	180.094	Bzw1	basic_leucine_zipper_and_W2_domains_1
ENSMUSG00000022354	135.862	153.861	145.982	133.335	140.241	130.688	103.749	126.753	134.789	124.483	119.326	115.861	Ndufb9	NADH_dehydrogenase_(ubiquinone)_1_beta_subcomplex_9
ENSMUSG00000024521	24.0516	34.8452	21.3617	142.611	140.237	124.252	64.7147	58.4051	66.6063	153.058	214.057	160.18	Pmaip1	phorbol-12-myristate-13-acetate-induced_protein_1
ENSMUSG00000005732	245.443	241.143	286.944	134.589	140.032	139.605	197.367	217.685	210.837	150.263	159.391	149.96	Ranbp1	RAN_binding_protein_1
ENSMUSG00000071076	138.744	155.624	127.658	154.637	139.872	124.616	251.493	201.508	242.584	200.731	234.36	185.158	Jund	jun_D_proto-oncogene
ENSMUSG00000031996	123.755	114.477	100.687	140.638	139.853	150.802	100.704	91.2551	102.563	90.3237	78.701	96.9223	Aplp2	amyloid_beta_(A4)_precursor-like_protein_2
ENSMUSG00000021270	227.385	255.773	241.694	134.521	139.663	130.475	208.929	216.501	216.864	164.601	168.308	162.665	Hsp90aa1	heat_shock_protein_90_alpha_(cytosolic)_class_A_member_1
ENSMUSG00000050912	63.6644	60.9393	64.8767	139.118	139.446	142.054	89.4226	88.0188	92.6384	136.906	138.167	135.321	Tmem123	transmembrane_protein_123
ENSMUSG00000021025	189.702	183.582	117.115	150.87	139.386	95.7337	405.964	353.141	420.048	446.001	361.481	293.744	Nfkbia	nuclear_factor_of_kappa_light_polypeptide_gene_enhancer_in_B_cells_inhibitor_alpha
ENSMUSG00000022551	191.984	204.106	202.786	149.364	138.155	143.974	173.26	172.772	167.9	169.257	156.842	190.111	Cyc1	cytochrome_c-1
ENSMUSG00000053559	7.34313	8.99643	8.83001	130.649	137.48	133.059	5.36983	6.23711	7.24519	35.4383	35.2448	41.0798	Smagp	small_cell_adhesion_glycoprotein
ENSMUSG00000021606	189.475	183.353	182.231	117.587	137.381	130.699	120.168	159.441	142.261	125.106	130.591	133.781	Ndufs6	NADH_dehydrogenase_(ubiquinone)_Fe-S_protein_6
ENSMUSG00000059775	8.25986	4.39537	7.54897	128.6	137.232	130.621	2.90705	3.36714	6.13753	77.5626	87.6294	120.525	Rps26-ps1	ribosomal_protein_S26_pseudogene_1
ENSMUSG00000006390	27.7584	20.2951	19.8641	134.66	136.884	161.018	28.673	26.4409	35.7925	47.9205	43.577	50.2267	Elovl1	elongation_of_very_long_chain_fatty_acids_(FEN1/Elo2_SUR4/Elo3_yeast)-like_1
ENSMUSG00000015671	119.55	129.901	147.702	139.367	136.397	137.489	114.854	122.676	117.98	122.096	138.914	130.893	Psma2	proteasome_(prosome_macropain)_subunit_alpha_type_2
ENSMUSG00000071655	156.152	152.822	153.533	137.712	136.103	137.684	124.341	136.518	133.98	118.465	126.267	123.409	Ubxn1	UBX_domain_protein_1
ENSMUSG00000049327	116.833	109.922	118.798	137.952	136.043	129.007	90.2223	92.6831	94.9008	98.8073	105.032	105.281	Setd8	SET_domain_containing_(lysine_methyltransferase)_8
ENSMUSG00000024953	50.9419	52.1915	51.906	128.613	135.919	135.674	35.3129	36.0954	41.215	47.7201	53.184	48.4988	Prdx5	peroxiredoxin_5
ENSMUSG00000006498	209.955	192.249	209.392	130.909	135.446	130.64	177.963	168.254	180.458	149.888	159.39	152.95	Ptbp1	polypyrimidine_tract_binding_protein_1
ENSMUSG00000024012	198.281	183.162	188.384	126.464	135.399	139.216	159.477	151.064	144.091	109.867	111.247	108.291	Mtch1	mitochondrial_carrier_homolog_1_(C._elegans)
ENSMUSG00000045545	3644.91	2278.03	2306.23	156.06	134.461	191.887	10667.4	10395.4	9417.13	6096.34	4863.15	3986.09	Krt14	keratin_14
ENSMUSG00000019817	15.5439	20.9865	21.8583	136.78	134.181	135.332	9.00339	7.64126	11.2424	54.1914	61.5131	66.869	Plagl1	pleiomorphic_adenoma_gene-like_1
ENSMUSG00000002015	85.2923	84.128	80.4997	134.764	133.687	139.832	68.313	68.3387	78.3671	63.1722	71.2097	75.6251	Bcap31	B_cell_receptor_associated_protein_31
ENSMUSG00000026234	194.022	178.01	210.88	129.416	133.591	118.992	152.389	156.255	150.645	154.54	160.592	165.472	Ncl	nucleolin
ENSMUSG00000030795	167.906	192.959	221.602	136.517	133.333	146.962	145.274	138.659	156.44	105.496	104.028	105.388	Fus	fused_in_sarcoma
ENSMUSG00000022452	116.347	127.927	127.531	126.483	133.221	132.795	134.179	131.367	122.151	100.651	120.787	107.639	Smdt1	single-pass_membrane_protein_with_aspartate_rich_tail_1
ENSMUSG00000025613	155.183	167.322	180.956	129.345	132.897	131.53	135.486	139.206	145.697	151.255	156.729	156.442	Cct8	chaperonin_containing_Tcp1_subunit_8_(theta)
ENSMUSG00000004771	25.2665	36.3118	40.0959	123.709	132.868	135.288	38.131	37.0459	37.3037	62.5866	66.7504	63.7018	Rab11a	RAB11A_member_RAS_oncogene_family
ENSMUSG00000039105	62.891	83.117	77.1143	131.059	132.793	128.129	58.492	60.8509	73.9437	77.1721	90.8766	80.0964	Atp6v1g1	ATPase_H+_transporting_lysosomal_V1_subunit_G1
ENSMUSG00000033161	243.668	196.221	167.405	127.573	132.611	122.339	283.309	263.937	283.937	289.021	271.688	283.529	Atp1a1	ATPase_Na+/K+_transporting_alpha_1_polypeptide
ENSMUSG00000000787	102.379	147.04	133.747	131.368	132.551	120.199	133.965	135.32	138.27	123.684	130.229	123.909	Ddx3x	DEAD/H_(Asp-Glu-Ala-Asp/His)_box_polypeptide_3_X-linked
ENSMUSG00000010406	152.333	155.736	166.379	135.928	132.32	151.086	117.839	137.957	144.21	113.638	105.596	109.769	Mrpl52	mitochondrial_ribosomal_protein_L52
ENSMUSG00000089804	36.919	41.5728	42.3654	116.822	132.241	143.5	25.695	22.9061	22.9881	33.8529	35.3608	39.8874	Gm16136	predicted_gene_16136
ENSMUSG00000027404	214.122	234.604	230.238	131.07	132.19	131.128	221.637	213.263	211.129	134.579	145.843	143.478	Snrpb	small_nuclear_ribonucleoprotein_B
ENSMUSG00000070319	160.746	147.17	155.521	131.105	131.934	136.675	132.864	139.649	136.288	133.564	138.864	141.563	Eif3g	eukaryotic_translation_initiation_factor_3_subunit_G
ENSMUSG00000054766	311.965	268.906	339.095	124.506	131.466	129.072	229.336	260.099	238.968	154.766	161.134	152.186	Set	SET_nuclear_oncogene
ENSMUSG00000071547	251.446	193.194	200.107	148.678	131.398	126.971	207.882	214.963	204.019	229.313	260.518	279.333	Nt5dc2	5'-nucleotidase_domain_containing_2
ENSMUSG00000061126	5.77613	3.93145	3.55395	134.986	130.601	134.658	3.77669	3.50281	9.23835	33.2199	30.3993	43.6551	Cyp4f39	cytochrome_P450_family_4_subfamily_f_polypeptide_39
ENSMUSG00000028378	13.0066	11.5178	11.7566	118.224	130.549	140.43	12.6318	16.578	13.8013	20.194	27.3225	25.5285	Ptgr1	prostaglandin_reductase_1
ENSMUSG00000005973	46.9724	53.0646	54.1526	116.789	130.509	143.114	30.7467	28.6546	30.4269	59.717	64.3197	63.858	Rcn1	reticulocalbin_1
ENSMUSG00000039067	97.8091	99.6755	100.907	117.081	130.237	122.723	76.0555	78.8132	71.5171	78.4797	80.6244	80.8866	Psmd7	proteasome_(prosome_macropain)_26S_subunit_non-ATPase_7
ENSMUSG00000034868	80.0645	90.4411	86.6571	127.406	129.904	139.905	69.6935	70.073	72.1125	57.5566	57.9232	58.6463	Myl12b	myosin_light_chain_12B_regulatory
ENSMUSG00000060373	175.553	180.295	199.174	128.446	129.619	129.619	135.687	145.167	154.153	121.12	138.056	124.789	Hnrnpc	heterogeneous_nuclear_ribonucleoprotein_C
ENSMUSG00000090553	82.1769	155.421	162.304	121.158	129.423	139.269	124.118	135.901	125.868	105.164	109.103	106.404	Snrpe	small_nuclear_ribonucleoprotein_E
ENSMUSG00000030007	158.615	151.981	147.54	126.429	128.961	121.329	119.967	123.35	127.028	137.4	149.805	140.758	Cct7	chaperonin_containing_Tcp1_subunit_7_(eta)
ENSMUSG00000092341	50.1912	80.7998	88.8059	128.274	128.411	159.939	87.3565	86.3715	82.4688	168.08	112.298	162.225	Malat1	metastasis_associated_lung_adenocarcinoma_transcript_1_(non-coding_RNA)
ENSMUSG00000026923	88.5277	82.3919	73.0709	124.493	128.194	121.003	75.2679	62.4579	80.0663	110.01	96.5469	126.348	Notch1	notch_1
ENSMUSG00000022890	161.264	190.332	196.88	121.695	127.419	122.227	129.089	143.903	168.905	114.495	128.783	124.418	Atp5j	ATP_synthase_H+_transporting_mitochondrial_F0_complex_subunit_F
ENSMUSG00000025781	143.503	158.313	160.668	122.314	127.309	125.772	116.258	130.971	135.878	119.617	131.971	120.287	Atp5c1	ATP_synthase_H+_transporting_mitochondrial_F1_complex_gamma_polypeptide_1
ENSMUSG00000041355	150.674	142.93	138.26	118.437	126.612	125.558	133.692	134.723	139.959	120.66	118.553	121.82	Ssr2	signal_sequence_receptor_beta
ENSMUSG00000022218	12.2444	12.3876	10.0873	124.25	126.581	128.608	4.31845	3.55435	8.88859	14.7552	27.7976	22.863	Tgm1	transglutaminase_1_K_polypeptide
ENSMUSG00000020708	110.71	117.55	121.934	125.512	126.489	126.758	112.064	116.265	122.015	138.683	150.721	137.285	Psmc5	protease_(prosome_macropain)_26S_subunit_ATPase_5
ENSMUSG00000028426	95.0499	99.4933	110.414	120.276	126.265	120.436	98.7717	93.9503	92.857	97.9638	107.68	104.174	Rad23b	RAD23b_homolog_(S._cerevisiae)
ENSMUSG00000058569	181.345	163.328	161.829	128.325	126.089	131.262	134.018	138.219	149.086	116.34	114.71	130.237	Tmed9	transmembrane_emp24_protein_transport_domain_containing_9
ENSMUSG00000019432	186.132	212.504	213.93	126.213	125.957	142.804	166.396	165.336	177.187	139.973	125.663	144.046	Ddx39b	DEAD_(Asp-Glu-Ala-Asp)_box_polypeptide_39B
ENSMUSG00000020571	238.549	201.261	188.679	128.973	125.838	138.297	167.029	171.249	191.113	135.25	132.481	140.899	Pdia6	protein_disulfide_isomerase_associated_6
ENSMUSG00000005566	294.626	288.38	296.256	118.802	125.505	116.588	224.703	223.157	221.496	135.428	140.947	139.588	Trim28	tripartite_motif-containing_28
ENSMUSG00000024914	148.347	155.892	159.378	121.546	125.487	133.556	128.761	131.81	139.94	105.926	107.562	106.066	Drap1	Dr1_associated_protein_1_(negative_cofactor_2_alpha)
ENSMUSG00000093803	107.501	157.612	127.942	134.449	125.403	153.108	99.4672	96.4807	118.343	113.847	94.935	114.151	Ppp2r3d	protein_phosphatase_2_(formerly_2A)_regulatory_subunit_B''_delta
ENSMUSG00000061904	122.121	134.07	124.266	129.518	125.025	125.111	125.288	123.448	127.443	129.219	131.145	130.176	Slc25a3	solute_carrier_family_25_(mitochondrial_carrier_phosphate_carrier)_member_3
ENSMUSG00000035478	254.466	227.097	239.407	118.345	124.949	125.465	189.828	186.301	179.754	112.56	110.94	112.38	Mbd3	methyl-CpG_binding_domain_protein_3
ENSMUSG00000029465	79.5965	83.9118	98.7124	134.569	124.632	129.09	82.2436	88.4519	91.8	102.7	105.043	99.5313	Arpc3	actin_related_protein_2/3_complex_subunit_3
ENSMUSG00000027593	241.091	231.176	240.517	123.36	124.598	123.286	208.46	209.957	204.63	107.227	111.103	108.3	Raly	hnRNP-associated_with_lethal_yellow
ENSMUSG00000019362	115.525	122.485	134.354	126.592	124.53	123.264	108.217	105.462	99.0687	101.253	104.189	102.048	D8Ertd738e	DNA_segment_Chr_8_ERATO_Doi_738_expressed
ENSMUSG00000045667	17.6688	18.7724	20.2984	115.702	124.436	119.649	6.97384	5.985	9.32778	49.3955	54.101	56.1801	Smtnl2	smoothelin-like_2
ENSMUSG00000021131	114.358	143.62	153.198	122.178	124.345	120.663	120.388	129.587	111.724	105.043	114.694	112.36	Erh	enhancer_of_rudimentary_homolog_(Drosophila)
ENSMUSG00000029328	76.855	136.449	128.636	125.706	124.119	121.826	108.059	109.373	117.82	101.875	92.6417	109.166	Hnrnpdl	heterogeneous_nuclear_ribonucleoprotein_D-like
ENSMUSG00000061613	171.463	185.75	208.438	129.325	124.015	126.519	157.868	161.036	165.334	143.857	136.909	145.304	U2af1	U2_small_nuclear_ribonucleoprotein_auxiliary_factor_(U2AF)_1
ENSMUSG00000018567	91.4129	83.7876	90.7367	124.693	123.862	131.458	76.8128	80.8725	70.2273	84.0824	87.2593	83.1013	Gabarap	gamma-aminobutyric_acid_receptor_associated_protein
ENSMUSG00000056076	215.887	166.408	194.83	126.732	123.813	123.462	173.144	167.176	166.21	133.622	141.05	145.448	Eif3b	eukaryotic_translation_initiation_factor_3_subunit_B
ENSMUSG00000027940	173.738	120.485	162.454	122.684	123.619	127.188	133.28	122.451	136.482	118.521	115.144	128.787	Tpm3	tropomyosin_3_gamma
ENSMUSG00000033916	77.8565	85.4009	81.445	122.565	123.436	130.58	77.188	79.185	84.4024	101.827	104.484	100.714	Chmp2a	charged_multivesicular_body_protein_2A
ENSMUSG00000022463	87.5831	73.0914	70.0826	122.588	123.257	120.503	75.637	64.9013	81.0942	75.6716	64.1209	82.3932	Srebf2	sterol_regulatory_element_binding_factor_2
ENSMUSG00000037188	26.5243	32.3674	31.6368	123.768	123.256	123.81	10.8406	10.3382	13.9181	48.4095	52.1751	59.145	Grhl3	grainyhead-like_3_(Drosophila)
ENSMUSG00000030697	166.536	154.737	162.969	127.246	122.278	137.702	133.016	130.502	121.959	101.184	97.3527	102.954	Ppp4c	protein_phosphatase_4_catalytic_subunit
ENSMUSG00000027566	115.454	118.453	127.199	109.299	121.647	118.81	87.0383	101.408	96.8906	94.5405	100.201	101.123	Psma7	proteasome_(prosome_macropain)_subunit_alpha_type_7
ENSMUSG00000036781	82.5315	80.8303	102.537	112.386	121.512	135.537	60.3201	79.8476	69.7781	108.332	100.225	116.156	Rps27l	ribosomal_protein_S27-like
ENSMUSG00000060261	172.607	155.916	166.203	115.761	121.508	116.837	136.544	130.275	126.881	97.2423	104.169	99.209	Gtf2i	general_transcription_factor_II_I
ENSMUSG00000041203	177.553	188.568	199.539	112.355	121.225	132.155	162.352	168.266	179.077	120.026	109.399	118.663	2310036O22Rik	RIKEN_cDNA_2310036O22_gene
ENSMUSG00000028837	90.5734	104.505	116.481	123.054	121.216	116.025	86.5821	89.9994	97.3767	101.675	119.896	105.237	Psmb2	proteasome_(prosome_macropain)_subunit_beta_type_2
ENSMUSG00000007041	123.873	95.6252	110.927	112.127	120.907	105.436	140.301	133.425	149.335	117.296	118.459	115.693	Clic1	chloride_intracellular_channel_1
ENSMUSG00000071528	142.132	189.268	223.043	138.657	120.829	137.274	115.111	141.118	172.733	95.4739	105.21	105.5	Usmg5	upregulated_during_skeletal_muscle_growth_5
ENSMUSG00000022186	128.901	102.486	107.462	116.978	120.458	107.89	110.516	113.79	107.403	95.9076	97.8028	102.203	Oxct1	3-oxoacid_CoA_transferase_1
ENSMUSG00000028393	71.0808	91.8735	79.536	108.593	120.193	128.551	39.8196	40.001	38.9078	33.0474	36.2488	44.0241	Alad	aminolevulinate_delta-_dehydratase
ENSMUSG00000019428	153.97	142.501	146.407	117.262	119.917	120.798	120.426	115.239	117.445	123.794	119.454	125.012	Fkbp8	FK506_binding_protein_8
ENSMUSG00000000078	65.0486	61.0502	51.1119	117.716	119.609	105.246	145.23	140.527	154.684	246.453	346.477	235.488	Klf6	Kruppel-like_factor_6
ENSMUSG00000017677	54.9764	77.2851	63.9565	117.142	119.547	104.152	59.1935	60.8222	77.0138	82.496	83.5656	99.3341	Wsb1	WD_repeat_and_SOCS_box-containing_1
ENSMUSG00000061032	158.709	135.746	144.51	120.068	118.591	114.843	119.941	124.793	121.442	117.184	113.285	122.893	Rrp1	ribosomal_RNA_processing_1_homolog_(S._cerevisiae)
ENSMUSG00000049932	299.764	292.063	288.046	124.124	118.556	115.004	292.318	276.932	265.726	123.845	115.794	135.101	H2afx	H2A_histone_family_member_X
ENSMUSG00000059208	165.371	175.659	184.615	113.589	118.259	113.605	152.96	142.574	151.976	121.676	127.255	116.31	Hnrnpm	heterogeneous_nuclear_ribonucleoprotein_M
ENSMUSG00000028452	163.019	143.548	166.003	114.951	118.129	125.256	102.583	101.036	129.85	101.858	126.613	104.776	Vcp	valosin_containing_protein
ENSMUSG00000035215	164.647	188.502	201.872	108.031	118.044	111.764	118.34	128.866	149.159	128.362	118.403	129.173	Lsm7	LSM7_homolog_U6_small_nuclear_RNA_associated_(S._cerevisiae)
ENSMUSG00000014294	138.556	150.639	160.732	110.684	117.733	106.902	105.923	116.055	107.131	92.7767	89.6661	86.122	Ndufa2	NADH_dehydrogenase_(ubiquinone)_1_alpha_subcomplex_2
ENSMUSG00000020048	186.244	201.651	185.602	113.956	117.7	120.816	131.939	131.883	176.984	126.29	118.996	146.659	Hsp90b1	heat_shock_protein_90_beta_(Grp94)_member_1
ENSMUSG00000044408	47.0788	66.8151	66.8206	115.311	117.495	116.372	86.7175	100.591	95.6269	119.504	132.592	114.613	Sptssa	serine_palmitoyltransferase_small_subunit_A
ENSMUSG00000022450	113.487	104.624	95.6792	106.215	117.479	108.033	86.3412	91.7768	93.1163	83.1554	100.24	87.6024	Ndufa6	NADH_dehydrogenase_(ubiquinone)_1_alpha_subcomplex_6_(B14)
ENSMUSG00000031848	182.628	194.958	199.994	108.552	117.452	115.362	165.405	165.023	168.565	109.403	112.01	120.876	Lsm4	LSM4_homolog_U6_small_nuclear_RNA_associated_(S._cerevisiae)
ENSMUSG00000023020	105.117	119.931	125.83	129.12	117.27	124.307	97.4835	90.0165	96.6155	75.4216	83.8436	79.3733	Cox14	cytochrome_c_oxidase_assembly_protein_14
ENSMUSG00000044285	32.0616	69.9096	30.9581	102.056	117.245	145.384	82.4536	85.2896	56.7977	115.841	121.919	98.722	Gm1821	predicted_gene_1821
ENSMUSG00000019066	23.5184	16.4467	18.2796	113.643	116.869	118.119	27.2874	27.578	26.2978	83.3902	93.3041	83.3193	Rab3d	RAB3D_member_RAS_oncogene_family
ENSMUSG00000031059	132.428	132.42	128.188	104.201	116.654	103.932	117.001	120.068	132.512	92.4134	103.888	100.177	Ndufb11	NADH_dehydrogenase_(ubiquinone)_1_beta_subcomplex_11
ENSMUSG00000004610	138.48	132.729	128.484	116.784	116.544	124.664	95.0218	96.7004	95.1859	82.6793	100.659	95.8446	Etfb	electron_transferring_flavoprotein_beta_polypeptide
ENSMUSG00000024949	122.466	131.533	130.595	123.198	116.341	117.268	109.414	108.59	120.573	103.643	105.675	110.432	Sf1	splicing_factor_1
ENSMUSG00000044147	47.8604	52.8866	59.7441	115.544	116.064	109.371	77.0416	72.4684	78.5574	97.268	107.668	100.257	Arf6	ADP-ribosylation_factor_6
ENSMUSG00000004558	19.1869	22.8102	18.442	118.598	115.963	124.049	5.87565	6.87566	8.12309	25.0234	27.0041	30.7272	Ndrg2	N-myc_downstream_regulated_gene_2
ENSMUSG00000030281	34.6384	21.5736	21.6886	119.252	115.835	123.288	39.1602	40.8315	45.79	97.6638	91.2704	112.015	Il17rc	interleukin_17_receptor_C
ENSMUSG00000024393	235.236	207.204	220.848	117.639	115.834	116.437	190.539	173.339	186.961	119.84	120.8	121.307	Prrc2a	proline-rich_coiled-coil_2A
ENSMUSG00000028851	214.324	210.948	221.154	111.424	115.784	120.073	161.062	153.758	155.628	128.099	130.473	133.501	Nudc	nuclear_distribution_gene_C_homolog_(Aspergillus)
ENSMUSG00000026638	59.1951	55.2602	56.2047	113.236	115.725	108.731	49.5876	48.3043	54.011	63.4632	69.9768	63.1871	Irf6	interferon_regulatory_factor_6
ENSMUSG00000097971	197.13	113.044	63.5843	115.606	115.516	185.401	79.3223	78.4333	84.5123	147.944	83.8153	139.132	Gm26917	predicted_gene_26917
ENSMUSG00000034226	12.7062	12.7229	6.88238	112.151	115.436	112.999	4.45589	4.79438	11.3558	56.819	80.8766	69.7656	Rhov	ras_homolog_gene_family_member_V
ENSMUSG00000072214	13.1302	15.6052	13.788	115.697	115.2	123.919	6.61228	5.76726	9.72745	37.6261	39.3325	47.9061	2020-09-05	septin_5
ENSMUSG00000034120	90.5098	120.189	128.117	112.839	115.163	112.701	78.3088	95.5868	103.923	94.9825	82.7625	108.634	Srsf2	serine/arginine-rich_splicing_factor_2
ENSMUSG00000028416	140.459	121.842	133.924	113.566	115.126	119.891	113.855	121.579	114.425	107.412	116.898	113.121	Bag1	BCL2-associated_athanogene_1
ENSMUSG00000030357	242.931	223.553	230.978	108.55	115.12	112.75	163.073	161.677	167.397	142.874	138.452	134.718	Fkbp4	FK506_binding_protein_4
ENSMUSG00000032314	102.623	102.545	103.774	116.711	114.768	111.543	99.6383	100.139	100.263	93.9879	106.982	96.8431	Etfa	electron_transferring_flavoprotein_alpha_polypeptide
ENSMUSG00000002489	39.2183	36.2052	37.8316	116.455	114.719	102.722	40.3306	35.5557	37.8725	66.1914	66.9077	68.3376	Tiam1	T_cell_lymphoma_invasion_and_metastasis_1
ENSMUSG00000016921	58.1343	97.721	92.7025	117.35	114.396	112.975	71.9573	77.2992	74.3984	98.4511	92.1469	105.057	Srsf6	serine/arginine-rich_splicing_factor_6
ENSMUSG00000086841	67.3044	101.961	69.8484	107.142	114.319	105.322	98.1204	103.305	105.102	83.3409	96.5106	101.871	2410006H16Rik	RIKEN_cDNA_2410006H16_gene
ENSMUSG00000032330	80.6125	95.9912	96.3636	104.825	114.317	110.781	84.834	84.8508	86.2775	112.291	114.032	120.231	Cox7a2	cytochrome_c_oxidase_subunit_VIIa_2
ENSMUSG00000036606	108.178	94.8629	85.615	107.444	114.236	125.449	93.0859	86.2343	92.9809	70.78	58.9393	74.1426	Plxnb2	plexin_B2
ENSMUSG00000038146	20.9408	17.2868	16.3937	114.475	113.123	108.958	12.4513	10.4984	16.6899	69.0299	60.4091	81.7661	Notch3	notch_3
ENSMUSG00000021178	151.819	123.685	142.657	105.43	113.116	109.821	119.111	119.76	123.806	98.8025	100.207	100.351	Psmc1	protease_(prosome_macropain)_26S_subunit_ATPase_1
ENSMUSG00000059743	66.3083	62.8133	64.4765	109.182	113.111	106.115	65.053	55.0812	82.7606	121.1	110.113	114.721	Fdps	farnesyl_diphosphate_synthetase
ENSMUSG00000031672	137.019	124.386	127.449	105.676	112.713	111.941	103.501	99.4353	105.245	84.5996	83.1878	84.5294	Got2	glutamatic-oxaloacetic_transaminase_2_mitochondrial
ENSMUSG00000042541	86.4682	104.745	115.438	96.6023	112.558	108.502	77.7861	80.7897	96.0803	84.8399	89.2963	90.7814	Shfm1	split_hand/foot_malformation_(ectrodactyly)_type_1
ENSMUSG00000038462	72.764	79.4524	81.227	109.135	112.433	97.7528	77.2733	83.6621	73.3698	92.8078	101.278	91.6301	Uqcrfs1	ubiquinol-cytochrome_c_reductase_Rieske_iron-sulfur_polypeptide_1
ENSMUSG00000031231	91.3893	156.417	126.518	116.878	112.078	155.912	131.017	168.256	143.058	153.055	142.951	129.566	Cox7b	cytochrome_c_oxidase_subunit_VIIb
ENSMUSG00000078619	147.826	96.4204	110.806	114.613	111.928	122.048	180.975	183.376	163.192	128.534	129.139	125.586	Smarcd2	SWI/SNF_related_matrix_associated_actin_dependent_regulator_of_chromatin_subfamily_d_member_2
ENSMUSG00000029064	180.346	160.197	168.489	109.186	111.909	111.026	159.741	144.961	154.122	105.124	113.442	107.357	Gnb1	guanine_nucleotide_binding_protein_(G_protein)_beta_1
ENSMUSG00000030751	124.07	126.182	142.796	105.515	111.902	111.022	112.705	108.215	112.6	91.3528	109.746	97.2246	Psma1	proteasome_(prosome_macropain)_subunit_alpha_type_1
ENSMUSG00000001417	16.9385	15.4482	15.5334	116.376	111.875	117.711	12.5937	12.0347	15.1804	45.4278	40.9819	56.9846	Rhbg	-
ENSMUSG00000025503	99.199	109.974	105.895	114.349	111.132	112.801	120.579	113.388	111.968	95.1355	101.584	95.9659	Taldo1	transaldolase_1
ENSMUSG00000040564	48.4063	41.7372	42.2998	118.307	110.944	132.331	91.615	93.9519	83.3437	71.5082	65.2008	72.9271	Apoc1	apolipoprotein_C-I
ENSMUSG00000037058	74.8633	91.7541	96.7743	103.929	110.88	117.947	72.1979	80.106	74.6638	61.9942	65.5433	60.9118	Paip2	polyadenylate-binding_protein-interacting_protein_2
ENSMUSG00000024966	196.022	181.716	185.677	109.838	110.704	109.203	120.359	123.849	140.979	139.108	153.739	145.403	Stip1	stress-induced_phosphoprotein_1
ENSMUSG00000005103	51.6643	54.0926	51.5651	108.509	110.477	100.915	50.5516	51.9537	52.0374	63.4752	60.3418	64.6222	Wdr1	WD_repeat_domain_1
ENSMUSG00000020483	246.426	231.517	238.899	102.036	110.049	106.029	157.459	149.108	147.892	70.2427	76.7163	66.147	Dynll2	dynein_light_chain_LC8-type_2
ENSMUSG00000006998	148.167	125.281	145.758	104.174	109.772	105.309	120.05	115.347	117.004	111.274	126.23	112.573	Psmd2	proteasome_(prosome_macropain)_26S_subunit_non-ATPase_2
ENSMUSG00000031838	43.6669	38.4454	42.5586	120.36	109.323	117.044	37.1351	37.6727	38.2308	59.6024	52.7565	64.1896	Ifi30	interferon_gamma_inducible_protein_30
ENSMUSG00000019471	139.679	121.462	132.549	109.044	109.303	113.808	103.368	102.335	105.646	82.7368	88.4018	85.5158	Cdc37	cell_division_cycle_37
ENSMUSG00000080242	86.638	72.4625	78.6727	102.115	109.297	93.1469	86.2947	62.6008	71.5532	80.3104	93.1167	75.718	Gm15487	predicted_gene_15487
ENSMUSG00000032092	36.6344	46.8731	42.1654	99.5001	108.576	105.768	38.272	37.0823	39.6555	59.0914	55.8934	66.4795	Mpzl2	myelin_protein_zero-like_2
ENSMUSG00000022505	40.0305	18.2622	21.0773	112.302	108.575	104.229	80.649	76.1697	82.2811	157.667	132.943	154.285	Emp2	epithelial_membrane_protein_2
ENSMUSG00000025410	81.3581	87.6643	90.6582	105.729	108.348	114.918	81.1787	81.4372	79.2536	78.7227	81.7814	83.4994	Dctn2	dynactin_2
ENSMUSG00000071172	84.0451	122.016	125.409	101.029	108.33	115.983	99.3642	109.662	98.5656	100.845	100.598	106.818	Srsf3	serine/arginine-rich_splicing_factor_3
ENSMUSG00000028195	140.857	153.171	96.9494	118.511	107.79	97.4766	508.337	411.863	407.265	487.049	672.217	332.915	Cyr61	cysteine_rich_protein_61
ENSMUSG00000001056	121.096	119.775	133.859	114.65	107.714	118.949	105.158	110.684	108.226	92.6206	105.32	111.815	Nhp2	NHP2_ribonucleoprotein
ENSMUSG00000020646	8.78994	9.36303	8.29352	108.73	107.65	117.388	4.89178	5.36332	8.1325	17.3746	20.236	21.812	Mboat2	membrane_bound_O-acyltransferase_domain_containing_2
ENSMUSG00000048373	117.27	110.475	104.863	113.001	107.618	95.846	122.976	126.329	144.524	232.989	247.147	215.432	Fgfbp1	fibroblast_growth_factor_binding_protein_1
ENSMUSG00000011752	148.133	136.211	145.206	110.918	107.605	99.5607	75.9443	76.5606	90.6799	102.666	116.55	104.436	Pgam1	phosphoglycerate_mutase_1
ENSMUSG00000002477	89.8538	126.229	135.364	103.404	107.393	104.153	95.3134	108.812	100.437	93.4486	95.2721	96.0975	Snrpd1	small_nuclear_ribonucleoprotein_D1
ENSMUSG00000031954	113.627	112.345	122.4	97.2878	107.134	103.78	85.8685	88.7237	89.786	75.5336	86.7597	80.5846	Cfdp1	craniofacial_development_protein_1
ENSMUSG00000033589	47.0925	52.1856	39.636	107.251	107.022	118.365	81.365	74.0868	79.1749	92.4554	84.4896	90.3772	Reep4	receptor_accessory_protein_4
ENSMUSG00000008036	85.0412	85.7669	90.8872	116.07	106.58	106.03	87.526	85.4736	81.2622	87.3584	99.4255	89.5002	Ap2s1	adaptor-related_protein_complex_2_sigma_1_subunit
ENSMUSG00000043091	114.257	126.851	117.595	89.2387	106.294	114.395	145.716	126.79	113.117	85.9837	91.3866	85.6343	Tuba1c	tubulin_alpha_1C
ENSMUSG00000029467	90.7532	92.5905	81.8647	107.268	105.334	103.786	81.4145	77.2712	87.6482	102.332	95.8969	109.929	Atp2a2	ATPase_Ca++_transporting_cardiac_muscle_slow_twitch_2
ENSMUSG00000003534	104.889	125.652	93.6195	107.294	105.316	92.5906	75.1214	70.7317	72.9068	66.4505	57.1618	76.1245	Ddr1	discoidin_domain_receptor_family_member_1
ENSMUSG00000028656	78.8259	68.0723	70.371	99.7763	105.11	110.6	71.192	68.6273	69.0074	59.6646	64.2844	59.9076	Cap1	CAP_adenylate_cyclase-associated_protein_1_(yeast)
ENSMUSG00000000346	83.2413	94.2845	96.115	104.927	104.6	96.8511	100.195	103.923	91.0558	104.769	116.446	110.85	Dazap2	DAZ_associated_protein_2
ENSMUSG00000032015	42.0769	34.2018	40.0663	103.537	104.213	99.6474	74.9081	72.3435	73.2741	100.292	88.9329	97.7584	Pou2f3	POU_domain_class_2_transcription_factor_3
ENSMUSG00000019969	26.5661	27.5051	24.7065	101.531	104.168	101.006	20.9097	20.198	21.7969	36.4767	36.6096	43.9002	Psen1	presenilin_1
ENSMUSG00000028609	129.909	141.656	167.321	107.516	104.057	104.752	96.5111	116.108	134.547	97.2259	113.373	105.526	Magoh	mago-nashi_homolog_proliferation-associated_(Drosophila)
ENSMUSG00000031353	145.682	154.863	171.21	104.97	103.823	100.294	117.985	120.493	118.929	98.5037	105.85	100.973	Rbbp7	retinoblastoma_binding_protein_7
ENSMUSG00000021024	145.745	151.348	154.457	102.556	103.798	100.682	119.723	129.99	134.746	98.4729	105.221	92.7378	Psma6	proteasome_(prosome_macropain)_subunit_alpha_type_6
ENSMUSG00000071646	161.194	140.072	155.47	103.516	103.794	101.923	161.314	155.51	167.06	114.796	114.192	111.885	Mta2	metastasis-associated_gene_family_member_2
ENSMUSG00000069662	44.1115	55.037	65.7049	98.934	103.67	101.187	41.3982	45.9331	50.0993	89.8261	99.8972	97.2417	Marcks	myristoylated_alanine_rich_protein_kinase_C_substrate
ENSMUSG00000020656	7.77033	6.95665	7.80712	107.901	103.46	111.006	6.92747	7.40137	10.4796	53.9617	54.9395	68.568	Grhl1	grainyhead-like_1_(Drosophila)
ENSMUSG00000029642	59.0582	56.4514	60.6237	97.864	103.432	109.063	58.2991	59.5282	60.4316	104.755	123.436	115.705	Polr1d	polymerase_(RNA)_I_polypeptide_D
ENSMUSG00000029178	35.7132	39.0658	35.1489	104.714	103.286	93.2227	45.945	41.0288	48.7545	107.698	118.286	120.775	Klf3	Kruppel-like_factor_3_(basic)
ENSMUSG00000021701	48.69	49.1634	35.2927	97.4502	103.072	111.469	50.6334	42.7939	68.5692	82.1608	103.774	91.078	Plk2	polo-like_kinase_2
ENSMUSG00000005087	10.819	5.74069	5.7662	105.313	102.975	89.3169	33.4242	31.5464	37.5023	65.4518	59.1952	73.1932	Cd44	CD44_antigen
ENSMUSG00000047139	151.472	202.681	224.197	88.4975	102.724	93.3848	219.335	222.738	186.682	143.547	140.595	129.29	Cd24a	CD24a_antigen
ENSMUSG00000061315	89.3565	89.3418	94.9931	99.123	102.709	97.6213	73.9863	85.7004	82.7586	75.7821	85.3665	80.3936	Naca	nascent_polypeptide-associated_complex_alpha_polypeptide
ENSMUSG00000015846	103.277	82.5626	95.9437	106.466	102.614	100.272	120.979	111.873	107.184	127.724	119.761	121.289	Rxra	retinoid_X_receptor_alpha
ENSMUSG00000024853	166.913	142.979	161.623	102.702	102.53	101.647	128.731	127.914	126.285	90.6557	91.2079	83.0655	Sf3b2	splicing_factor_3b_subunit_2
ENSMUSG00000078578	72.3614	116.255	119.282	99.5825	102.464	96.3674	100.121	110.831	105.815	105.201	112.797	108.544	Ube2d3	ubiquitin-conjugating_enzyme_E2D_3
ENSMUSG00000020277	145.055	117.874	114.523	111.207	102.426	95.4955	64.0362	62.2109	71.5362	121.791	139.577	127.671	Pfkl	phosphofructokinase_liver_B-type
ENSMUSG00000001416	112.346	118.377	120.724	97.6251	102.217	95.5263	88.8945	91.0455	91.6625	101.157	108.905	105.865	Cct3	chaperonin_containing_Tcp1_subunit_3_(gamma)
ENSMUSG00000005575	149.84	146.882	148.77	103.759	102.028	100.866	127.043	121.278	132.93	107.916	107.261	114.076	Ube2m	ubiquitin-conjugating_enzyme_E2M
ENSMUSG00000021748	67.8227	88.3623	86.41	101.289	101.855	101.967	69.1592	68.183	74.7165	78.4975	84.2103	85.8917	Pdhb	pyruvate_dehydrogenase_(lipoamide)_beta
ENSMUSG00000022982	187.975	167.313	179.236	109.476	101.839	103.395	139.054	132.557	133.812	83.8654	80.432	79.579	Sod1	superoxide_dismutase_1_soluble
ENSMUSG00000020190	102.053	82.7794	80.6691	113.774	101.758	107.804	87.9109	90.2505	97.411	90.0409	92.0946	101.286	Mknk2	MAP_kinase-interacting_serine/threonine_kinase_2
ENSMUSG00000031328	145.789	119.453	121.183	91.5507	101.698	111.259	133.158	121.302	126.215	84.6073	76.8995	88.0436	Flna	filamin_alpha
ENSMUSG00000001504	134.976	180.521	151.424	106.037	101.674	95.443	149.444	160.073	172.641	179.664	160.806	167.068	Irx2	Iroquois_related_homeobox_2_(Drosophila)
ENSMUSG00000096232	107.474	124.723	123.015	106.133	101.604	107.223	119.475	112.277	96.2167	89.3131	97.16	96.1981	0610012G03Rik	RIKEN_cDNA_0610012G03_gene
ENSMUSG00000005968	17.0007	12.8547	12.111	96.3694	101.368	106.618	18.2415	16.1912	19.0225	45.8	42.7695	60.4244	Tuft1	tuftelin_1
ENSMUSG00000029472	197.099	161.115	162.549	98.5047	101.364	106.528	173.409	168.819	147.526	118.241	119.157	115.136	Anapc5	anaphase-promoting_complex_subunit_5
ENSMUSG00000069565	104.511	118.558	121.788	104.641	101.215	104.933	111.82	114.237	111.898	115.422	112.011	114.727	Dazap1	DAZ_associated_protein_1
ENSMUSG00000050359	6.16608	4.05574	2.95872	117.575	101.095	101.465	9.1684	9.78749	15.4369	49.9595	66.5119	67.776	Sprr1a	small_proline-rich_protein_1A
ENSMUSG00000024991	96.5697	97.7047	107.487	100.454	101.072	91.1998	92.9995	92.8708	95.0001	94.9622	102.167	96.0225	Eif3a	eukaryotic_translation_initiation_factor_3_subunit_A
ENSMUSG00000076437	104.195	139.858	142.95	88.3895	101.023	90.8553	85.2946	94.4027	98.9129	81.9357	89.2028	89.9986	2700094K13Rik	RIKEN_cDNA_2700094K13_gene
ENSMUSG00000052833	136.099	120.99	140.636	100.68	100.838	92.9679	103.837	105.12	109.574	80.5714	88.401	83.9756	Sae1	SUMO1_activating_enzyme_subunit_1
ENSMUSG00000032604	75.224	64.7229	63.0513	98.0358	100.758	107.606	64.9463	65.9194	63.1817	91.458	88.7189	92.1026	Qars	glutaminyl-tRNA_synthetase
ENSMUSG00000020307	97.546	106.899	120.455	103.131	100.603	102.211	76.4058	80.1686	78.2078	74.8371	83.8962	85.1151	Cdc34	cell_division_cycle_34
ENSMUSG00000018796	6.54406	3.90667	5.11714	103.58	100.515	106.621	6.54638	6.21909	7.42187	38.818	33.7086	41.1116	Acsl1	acyl-CoA_synthetase_long-chain_family_member_1
ENSMUSG00000031146	104.364	86.5157	83.7276	92.0804	100.183	107.582	153.346	162.721	151.488	109.693	111.557	114.683	Plp2	proteolipid_protein_2
ENSMUSG00000047459	120.167	138.279	139.725	98.1916	100.013	116.526	120.45	118.231	111.709	100.475	105.906	104.408	Dynlrb1	dynein_light_chain_roadblock-type_1
ENSMUSG00000044322	1.63109	0.832635	1.0215	100.974	99.6989	103.819	3.42044	2.98831	7.87567	17.0349	17.246	21.51	Dsc1	desmocollin_1
ENSMUSG00000034088	95.3029	78.2361	85.2489	100.046	99.687	93.6937	73.6444	67.9739	74.3457	101.894	109.265	101.563	Hdlbp	high_density_lipoprotein_(HDL)_binding_protein
ENSMUSG00000024870	117.443	108.941	115.331	104.358	99.4268	103.863	105.744	100.318	95.3835	76.0215	78.3173	74.8838	Rab1b	RAB1B_member_RAS_oncogene_family
ENSMUSG00000028478	103.343	95.4846	97.7096	100.343	99.364	98.2793	95.816	97.1789	88.3215	78.1304	92.3319	78.3256	Clta	clathrin_light_polypeptide_(Lca)
ENSMUSG00000060032	91.2361	98.8894	91.0913	105.449	99.3303	117.334	97.0519	93.3088	99.576	90.9743	94.8832	92.8888	H2afj	H2A_histone_family_member_J
ENSMUSG00000007039	36.9022	40.8163	45.3323	83.1981	99.1313	88.7102	18.0886	14.3431	17.3621	14.5333	12.9827	16.8307	Ddah2	dimethylarginine_dimethylaminohydrolase_2
ENSMUSG00000030884	94.4286	95.2134	91.6318	96.5365	99.0409	86.4943	81.0701	81.3604	78.8165	77.5028	90.0256	86.0714	Uqcrc2	ubiquinol_cytochrome_c_reductase_core_protein_2
ENSMUSG00000037266	31.1082	53.489	28.5043	115.618	98.7528	105.401	34.4298	38.0086	50.6931	71.3259	48.7421	83.7454	Rsrp1	arginine/serine_rich_protein_1
ENSMUSG00000001211	25.1604	22.0549	19.7016	100.755	98.7037	101.444	17.6658	17.3737	19.3101	59.7013	60.0114	70.8242	Agpat3	1-acylglycerol-3-phosphate_O-acyltransferase_3
ENSMUSG00000055065	114.318	124.319	123.677	96.7275	98.5233	97.0612	106.755	106.036	105.855	93.4164	84.1897	78.4285	Ddx17	DEAD_(Asp-Glu-Ala-Asp)_box_polypeptide_17
ENSMUSG00000022464	76.6984	69.1845	70.3016	104.647	98.5107	97.1075	92.5747	90.2026	110.218	82.7735	73.1775	86.1654	Slc38a4	solute_carrier_family_38_member_4
ENSMUSG00000027642	100.729	88.046	82.0366	95.7662	98.3574	96.3625	90.5596	86.0718	93.098	93.4251	91.4786	102.481	Rpn2	ribophorin_II
ENSMUSG00000022427	92.5693	96.2573	103.446	94.5562	98.2601	99.6246	88.6308	99.508	99.3465	104.852	115.843	113.603	Tomm22	translocase_of_outer_mitochondrial_membrane_22_homolog_(yeast)
ENSMUSG00000027276	31.7789	38.743	27.9733	98.8113	98.1199	90.3191	30.2362	29.0556	32.1349	38.8756	33.9481	44.4451	Jag1	jagged_1
ENSMUSG00000024190	130.365	138.158	81.0112	125.898	98.1004	69.742	299.081	255.147	334.096	307.7	344.313	217.22	Dusp1	dual_specificity_phosphatase_1
ENSMUSG00000056078	1.70974	1.66024	1.31497	104.229	98.0936	114.176	2.33877	2.6432	3.81286	13.4716	9.71391	17.4248	Lipm	lipase_family_member_M
ENSMUSG00000037072	78.1725	95.5001	94.8423	102.912	98.0747	98.3975	94.7321	101.709	97.8164	95.5683	103.468	98.6588	2020-09-15	selenoprotein
ENSMUSG00000036427	142.667	120.914	115.072	102.297	97.8149	95.1619	82.0584	85.2204	85.9506	94.4376	103.965	100.587	Gpi1	glucose_phosphate_isomerase_1
ENSMUSG00000003038	165.27	187.631	190.406	85.7552	97.8063	89.896	112.877	118.861	106.884	70.7522	77.9289	70.013	Hmgn2	high_mobility_group_nucleosomal_binding_domain_2
ENSMUSG00000028757	122.193	118.077	109.352	99.5065	97.772	105.689	102.773	100.042	110.74	88.9321	87.7267	94.8751	Ddost	dolichyl-di-phosphooligosaccharide-protein_glycotransferase
ENSMUSG00000025492	205.505	301.339	313.489	78.882	97.7495	95.347	141.046	131.479	168.804	63.8514	56.2604	53.1364	Ifitm3	interferon_induced_transmembrane_protein_3
ENSMUSG00000026558	83.9639	79.316	86.6489	93.6565	97.6142	87.2664	99.4587	88.5777	106.224	130.253	133.456	137.179	Uck2	uridine-cytidine_kinase_2
ENSMUSG00000056209	63.6933	89.6708	81.9937	96.8975	97.395	96.9336	65.5899	64.2291	71.4739	83.0873	96.8242	94.0888	Npm3	nucleoplasmin_3
ENSMUSG00000033940	80.8334	90.2278	91.6275	94.7211	97.2651	98.6801	75.3846	76.9367	79.6292	65.4426	72.6941	66.357	Brk1	BRICK1_SCAR/WAVE_actin-nucleating_complex_subunit
ENSMUSG00000030560	17.036	12.3155	14.847	94.4525	97.2519	83.7246	17.853	16.2249	24.6141	109.526	114.354	138.272	Ctsc	cathepsin_C
ENSMUSG00000020321	108.73	120.869	120.941	94.448	97.1762	96.8313	104.398	102.401	105.08	114.807	124.956	112.919	Mdh1	malate_dehydrogenase_1_NAD_(soluble)
ENSMUSG00000035621	73.2703	71.6855	62.8961	111.539	97.137	88.0258	73.863	66.9705	95.15	94.9394	113.148	109.744	Midn	midnolin
ENSMUSG00000046432	169.372	195.172	197.844	97.5726	97.0199	92.9545	95.428	102.646	108.083	68.3307	71.9334	70.5999	Ngfrap1	nerve_growth_factor_receptor_(TNFRSF16)_associated_protein_1
ENSMUSG00000024392	145.851	143.695	143.458	96.5418	96.9621	99.7859	129.487	120.12	131.634	92.5125	88.9842	91.4077	Bag6	BCL2-associated_athanogene_6
ENSMUSG00000028800	103.435	103.642	111.76	91.7865	96.8901	94.4734	88.9728	87.9255	96.0805	80.4921	84.655	73.9692	Hdac1	histone_deacetylase_1
ENSMUSG00000001472	74.5896	65.1542	71.5217	101.896	96.8784	105.137	65.5669	63.416	62.1806	74.9524	75.7668	78.7313	Tcf25	transcription_factor_25_(basic_helix-loop-helix)
ENSMUSG00000045394	112.475	126.57	128.166	91.0541	96.7713	92.0299	75.6812	71.5399	80.6815	61.0696	69.9671	77.2533	Epcam	epithelial_cell_adhesion_molecule
ENSMUSG00000025630	58.141	73.9021	82.6624	99.0154	96.7615	93.4817	72.1238	96.4823	81.3055	98.1358	115.93	106.207	Hprt	hypoxanthine_guanine_phosphoribosyl_transferase
ENSMUSG00000029455	140.439	135.124	128.494	97.2426	96.5605	100.897	108.761	109.467	111.565	71.9923	78.4331	72.3111	Aldh2	aldehyde_dehydrogenase_2_mitochondrial
ENSMUSG00000021102	129.626	138.481	139.45	93.6597	96.288	97.6055	117.395	109.17	113.393	91.1485	91.2321	86.8175	Glrx5	glutaredoxin_5_homolog_(S._cerevisiae)
ENSMUSG00000010095	96.9679	111.44	103.895	96.4061	96.1398	93.1134	110.743	109.455	125.586	71.6812	63.8974	75.1353	Slc3a2	solute_carrier_family_3_(activators_of_dibasic_and_neutral_amino_acid_transport)_member_2
ENSMUSG00000050856	147.098	150.963	181.597	103.5	96.0542	100.093	85.8106	101.516	148.407	97.3929	94.3955	104.109	Atp5k	ATP_synthase_H+_transporting_mitochondrial_F1F0_complex_subunit_E
ENSMUSG00000007739	135.484	129.828	138.368	92.8189	95.7482	97.6427	98.8765	120.459	105.862	94.647	104.442	96.7101	Cct4	chaperonin_containing_Tcp1_subunit_4_(delta)
ENSMUSG00000021957	126.597	111.55	107.74	96.8598	95.6394	93.3163	106.944	104.792	105.511	100.576	111.357	106.101	Tkt	transketolase
ENSMUSG00000025203	127.588	122.139	140.251	92.9107	95.5188	83.1498	93.9874	87.777	98.3782	81.2844	64.3554	76.8349	Scd2	stearoyl-Coenzyme_A_desaturase_2
ENSMUSG00000024248	118.446	110.565	113.51	88.2454	95.4394	107.058	113.89	127.994	119.323	62.7439	64.5345	62.3731	Cox7a2l	cytochrome_c_oxidase_subunit_VIIa_polypeptide_2-like
ENSMUSG00000022193	113.109	110.571	123.381	91.7282	95.2795	95.9004	90.3156	87.2197	113.53	70.533	85.0432	77.6789	Psmb5	proteasome_(prosome_macropain)_subunit_beta_type_5
ENSMUSG00000021218	105.811	97.3715	106.701	98.4829	95.0195	95.9277	104.622	111.578	101.282	106.152	112.649	102.393	Gdi2	guanosine_diphosphate_(GDP)_dissociation_inhibitor_2
ENSMUSG00000001288	102.424	97.6701	91.6841	98.4586	95.0043	98.6465	121.692	108.714	116.271	90.5034	82.0593	78.374	Rarg	retinoic_acid_receptor_gamma
ENSMUSG00000037243	17.4339	25.7186	21.5109	102.364	94.6785	115.138	17.6647	18.2481	21.9293	64.0982	48.7604	77.0448	Zfp692	zinc_finger_protein_692
ENSMUSG00000016252	71.4531	97.6731	108.385	86.0515	94.5993	98.7084	57.2417	73.8202	74.5266	49.9221	51.3645	52.577	Atp5e	ATP_synthase_H+_transporting_mitochondrial_F1_complex_epsilon_subunit
ENSMUSG00000024969	52.6342	48.8382	44.8036	95.8836	94.5346	98.7911	54.7346	53.3473	56.0588	75.0681	72.4502	79.2027	Mark2	MAP/microtubule_affinity-regulating_kinase_2
ENSMUSG00000028798	97.9019	93.5608	98.1361	92.0478	94.478	91.9367	73.7813	82.5548	81.8454	83.0047	95.7708	85.8583	Eif3i	eukaryotic_translation_initiation_factor_3_subunit_I
ENSMUSG00000000563	89.3371	98.4628	107.22	89.544	94.4266	87.2628	73.5794	84.241	87.5382	82.945	97.7083	88.0271	Atp5f1	ATP_synthase_H+_transporting_mitochondrial_F0_complex_subunit_B1
ENSMUSG00000024640	116.532	70.1104	78.7161	108.827	94.0384	87.8507	179.824	186.758	189.658	199.586	214.263	214.54	Psat1	phosphoserine_aminotransferase_1
ENSMUSG00000028860	30.0821	23.5698	19.3029	100.429	93.8118	107.9	35.1554	35.8549	30.5787	64.9645	58.3532	68.8964	Sytl1	synaptotagmin-like_1
ENSMUSG00000002524	146.872	141.071	148.794	94.487	93.6185	98.1386	114.368	110.182	105.118	88.8541	81.8493	99.0491	Puf60	poly-U_binding_splicing_factor_60
ENSMUSG00000024827	7.1232	7.53564	5.74429	97.3231	93.5003	92.5561	1.11125	1.13477	2.38336	6.84672	7.74437	10.9445	Gldc	glycine_decarboxylase
ENSMUSG00000030591	107.639	102.378	105.333	93.7769	93.3585	98.1636	111.991	110.519	105.455	89.8314	95.7296	91.8498	Psmd8	proteasome_(prosome_macropain)_26S_subunit_non-ATPase_8
ENSMUSG00000020368	93.4791	98.503	92.8851	90.6645	93.2946	92.2367	82.652	86.6543	93.8091	104.809	101.275	112.301	Canx	calnexin
ENSMUSG00000042745	28.7014	36.0203	22.4826	96.5992	93.2388	74.1613	25.6531	24.9243	31.3343	75.8131	115.269	64.4935	Id1	inhibitor_of_DNA_binding_1
ENSMUSG00000001348	53.1399	51.5005	48.1786	86.8063	93.2049	97.3234	30.5526	29.9682	33.8486	40.7978	41.5818	53.1353	Acp5	acid_phosphatase_5_tartrate_resistant
ENSMUSG00000015605	86.0065	100.12	78.47	91.1713	93.0332	89.1134	91.8647	85.6523	96.3191	67.3276	80.1726	72.9378	Srf	serum_response_factor
ENSMUSG00000063480	107.193	114.785	129.359	91.6993	92.9725	98.0463	102.622	110.215	103.115	95.0202	102.41	96.7462	Nhp2l1	NHP2_non-histone_chromosome_protein_2-like_1_(S._cerevisiae)
ENSMUSG00000057193	35.0474	27.3575	24.929	96.0157	92.9444	93.2803	37.58	35.8827	37.7814	73.773	67.7893	76.5486	Slc44a2	solute_carrier_family_44_member_2
ENSMUSG00000083773	213.484	160.974	161.908	90.2792	92.8032	87.0762	139.729	136.396	118.27	90.6142	98.248	89.4275	Gm13394	predicted_gene_13394
ENSMUSG00000024335	90.2001	101.593	95.9325	93.2755	92.7903	94.1017	92.5826	81.1299	100.592	94.2718	92.6929	98.5737	Brd2	bromodomain_containing_2
ENSMUSG00000030082	66.6837	67.4008	65.1553	89.9647	92.7184	92.6834	67.6667	64.2993	67.3699	75.8998	78.7765	78.3717	Sec61a1	Sec61_alpha_1_subunit_(S._cerevisiae)
ENSMUSG00000008475	63.8576	65.2725	73.9347	90.5432	92.6321	94.3036	70.596	78.4338	79.614	74.5426	79.7978	75.1837	Arpc5	actin_related_protein_2/3_complex_subunit_5
ENSMUSG00000034573	35.4239	36.1291	33.3786	96.5345	92.6049	82.5086	30.018	25.9623	26.0013	41.7664	41.6732	44.0163	Ptpn13	protein_tyrosine_phosphatase_non-receptor_type_13
ENSMUSG00000040128	60.2338	97.5002	58.8055	105.678	92.5473	74.9971	73.7941	71.2522	109.063	114.923	119.796	94.5438	Pnrc1	proline-rich_nuclear_receptor_coactivator_1
ENSMUSG00000028032	67.4354	65.4843	66.6107	91.9896	92.0538	87.6326	57.3398	52.7989	57.1246	68.683	74.474	67.3815	Papss1	3'-phosphoadenosine_5'-phosphosulfate_synthase_1
ENSMUSG00000034908	69.7967	56.2813	51.7928	94.5565	92.0502	97.2388	61.3246	57.5409	60.2596	83.3927	75.4405	96.7031	Sidt2	SID1_transmembrane_family_member_2
ENSMUSG00000015120	115.82	136.285	133.947	88.4458	91.9558	98.7548	120.747	124.229	118.673	86.7088	79.0134	88.0874	Ube2i	ubiquitin-conjugating_enzyme_E2I
ENSMUSG00000037815	129.755	110.746	116.104	91.8996	91.8549	91.8232	115.397	111.707	114.319	94.0621	96.3469	87.5136	Ctnna1	catenin_(cadherin_associated_protein)_alpha_1
ENSMUSG00000055762	112.848	106.109	112.724	94.1251	91.7661	92.8135	84.0223	88.9414	84.4049	103.935	110.006	112.151	Eef1d	eukaryotic_translation_elongation_factor_1_delta_(guanine_nucleotide_exchange_protein)
ENSMUSG00000041740	111.825	105.991	108.981	87.995	91.7247	89.05	101.085	95.2615	95.9344	86.1943	94.7445	88.7953	Rnf10	ring_finger_protein_10
ENSMUSG00000031839	68.7134	86.5933	81.8018	85.2977	91.6614	87.5441	55.2732	59.4876	67.9964	57.7206	63.0705	55.8029	Hsbp1	heat_shock_factor_binding_protein_1
ENSMUSG00000025228	63.4534	52.3484	57.308	85.0965	91.3995	89.0019	63.9849	64.0419	60.2466	62.583	62.8825	65.7311	Actr1a	ARP1_actin-related_protein_1A_centractin_alpha
ENSMUSG00000004849	86.0443	79.8228	85.5399	91.2395	91.3944	90.7214	71.2669	73.4065	77.7007	72.4856	73.5674	72.4409	Ap1s1	adaptor_protein_complex_AP-1_sigma_1
ENSMUSG00000041881	89.1991	97.1772	94.1842	101.051	91.3304	102.101	58.8497	66.4378	71.9384	69.1387	70.3129	66.8311	Ndufa7	NADH_dehydrogenase_(ubiquinone)_1_alpha_subcomplex_7_(B14.5a)
ENSMUSG00000013593	114.732	119.141	119.711	93.1098	91.3035	88.7053	112.621	110.506	108.026	82.9028	84.5981	84.3935	Ndufs2	NADH_dehydrogenase_(ubiquinone)_Fe-S_protein_2
ENSMUSG00000053931	38.5795	44.9013	46.2553	83.0724	91.2815	102.634	12.6746	11.52	13.4239	11.0959	11.349	14.44	Cnn3	calponin_3_acidic
ENSMUSG00000021577	104.766	98.3568	96.9814	91.3238	91.0105	92.9557	80.6925	75.2285	78.384	63.8133	61.0562	67.3658	Sdha	succinate_dehydrogenase_complex_subunit_A_flavoprotein_(Fp)
ENSMUSG00000052681	45.2631	60.2136	58.1342	96.2069	90.6705	91.4739	56.6895	56.4371	62.0256	62.6977	62.2941	60.6703	Rap1b	RAS_related_protein_1b
ENSMUSG00000042712	154.128	195.933	215.703	77.3173	90.6437	81.0893	114.472	129.866	123.839	53.7109	57.4146	45.5851	Wbp5	WW_domain_binding_protein_5
ENSMUSG00000034684	149.585	131.299	115.968	85.9729	90.503	91.3314	154.938	157.356	157.557	111.994	91.6842	103.302	Sema3f	sema_domain_immunoglobulin_domain_(Ig)_short_basic_domain_secreted_(semaphorin)_3F
ENSMUSG00000020149	54.6847	61.3148	65.4025	88.7073	90.4904	85.672	66.1787	66.609	64.1056	81.2203	92.7185	81.9214	Rab1	RAB1_member_RAS_oncogene_family
ENSMUSG00000020821	53.759	42.1977	44.6737	91.8324	90.2485	95.954	44.2888	42.4178	41.6079	41.1683	41.2821	40.3597	Kif1c	kinesin_family_member_1C
ENSMUSG00000020496	176.488	163.401	162.578	91.5553	90.1709	89.1497	142.672	142.191	134.683	94.6661	103.702	99.3712	Rnf187	ring_finger_protein_187
ENSMUSG00000020738	158.349	179.321	190.838	90.1189	90.0105	94.6391	148.448	139.873	153.411	90.5808	96.8156	89.4153	Sumo2	SMT3_suppressor_of_mif_two_3_homolog_2_(yeast)
ENSMUSG00000034928	58.942	76.71	69.3582	86.0515	89.9989	96.6911	53.6611	49.0931	57.4462	49.4696	49.1808	50.9586	Rnf44	ring_finger_protein_44
ENSMUSG00000038482	102.993	128.44	123.982	78.2793	89.9737	85.9272	116.291	113.366	100.491	97.9485	94.755	103.856	Tfdp1	transcription_factor_Dp_1
ENSMUSG00000046722	75.3872	73.106	84.4383	85.3956	89.9702	87.8222	82.9721	75.6951	75.1244	81.0847	77.4579	78.7927	Cdc42se1	CDC42_small_effector_1
ENSMUSG00000048578	197.273	181.516	203.237	83.2674	89.8203	94.6412	165.821	154.901	143.874	90.8977	78.9639	83.4193	Mlec	malectin
ENSMUSG00000030738	121.647	94.906	107.387	85.3032	89.7077	84.2177	92.6127	87.76	92.5245	95.5804	99.3299	94.046	Eif3c	eukaryotic_translation_initiation_factor_3_subunit_C
ENSMUSG00000071072	85.5212	104.082	128.141	87.7336	89.5235	85.9772	86.3128	109.495	97.8595	94.1672	104.717	93.209	Ptges3	prostaglandin_E_synthase_3_(cytosolic)
ENSMUSG00000002102	114.051	100.499	105.327	88.5381	89.4833	86.1282	88.1524	87.691	93.1995	82.4531	90.0013	86.9202	Psmc3	proteasome_(prosome_macropain)_26S_subunit_ATPase_3
ENSMUSG00000000399	92.6863	87.0204	92.7272	91.0913	89.2007	86.7268	67.3182	67.6986	76.9495	66.5991	78.6458	72.9799	Ndufa9	NADH_dehydrogenase_(ubiquinone)_1_alpha_subcomplex_9
ENSMUSG00000032412	75.3237	79.2157	75.9812	83.3968	89.0132	86.1858	97.9296	105.374	95.7001	104.661	97.1219	99.2557	Atp1b3	ATPase_Na+/K+_transporting_beta_3_polypeptide
ENSMUSG00000027829	21.2352	35.8064	29.9598	93.4129	88.9724	89.8851	37.9614	38.8043	48.6851	85.7387	82.7441	91.943	Ccnl1	cyclin_L1
ENSMUSG00000022892	208.966	234.748	194.57	87.6646	88.9125	101.257	140.172	127.839	133.185	94.3015	80.962	90.4077	App	amyloid_beta_(A4)_precursor_protein
ENSMUSG00000044502	62.3433	59.7373	60.348	87.8328	88.8109	86.8704	49.6194	45.4422	51.3801	54.6633	56.5017	61.1824	Bod1	biorientation_of_chromosomes_in_cell_division_1
ENSMUSG00000025499	67.8534	61.5747	65.2358	79.4251	88.7918	87.8499	85.5707	85.582	84.7957	91.5276	84.0277	93.0053	Hras	Harvey_rat_sarcoma_virus_oncogene
ENSMUSG00000060803	163.084	194.543	179.966	101.414	88.7037	80.1171	115.2	166.424	145.647	114.243	109.835	110.168	Gstp1	glutathione_S-transferase_pi_1
ENSMUSG00000000001	46.3945	52.0462	55.4364	87.4321	88.671	81.2004	49.5343	50.6165	50.5283	64.6883	73.1483	65.9212	Gnai3	guanine_nucleotide_binding_protein_(G_protein)_alpha_inhibiting_3
ENSMUSG00000035890	93.9998	102.971	93.1504	94.5403	88.5495	91.4417	105.833	100.883	106.733	120.074	111.711	118.229	Rnf126	ring_finger_protein_126
ENSMUSG00000055436	39.1667	72.39	69.084	94.6797	88.3221	96.988	52.1373	54.2635	53.2611	65.4385	59.6787	71.338	Srsf11	serine/arginine-rich_splicing_factor_11
ENSMUSG00000038020	24.8668	16.7378	17.4738	93.8268	88.2291	92.0641	62.2583	61.7367	57.5706	106.888	90.9685	108.676	Rapgefl1	Rap_guanine_nucleotide_exchange_factor_(GEF)-like_1
ENSMUSG00000058799	109.314	148.262	160.178	81.7992	88.0056	85.5745	100.346	103.924	107.538	66.9053	74.8911	69.3891	Nap1l1	nucleosome_assembly_protein_1-like_1
ENSMUSG00000033379	27.4882	33.8627	29.5808	90.2792	87.993	101.964	22.9241	23.7056	31.315	55.7897	53.4024	58.8688	Atp6v0b	ATPase_H+_transporting_lysosomal_V0_subunit_B
ENSMUSG00000039218	86.2007	98.3148	98.0663	96.3502	87.9617	81.5983	70.6834	67.7492	75.0359	79.2858	72.6213	83.1378	Srrm2	serine/arginine_repetitive_matrix_2
ENSMUSG00000022404	55.0621	60.1613	60.1441	87.7513	87.9074	84.8711	57.3185	62.5608	56.8031	65.332	69.5742	65.9077	Slc25a17	solute_carrier_family_25_(mitochondrial_carrier_peroxisomal_membrane_protein)_member_17
ENSMUSG00000076432	118.611	122.104	130.646	81.1286	87.8434	87.5453	107.905	114.094	110.932	79.4381	85.4967	78.2687	Ywhaq	tyrosine_3-monooxygenase/tryptophan_5-monooxygenase_activation_protein_theta_polypeptide
ENSMUSG00000032301	85.9236	81.4803	100.825	83.7234	87.7505	91.7249	74.7533	86.2003	82.5196	84.5722	93.7133	86.1487	Psma4	proteasome_(prosome_macropain)_subunit_alpha_type_4
ENSMUSG00000025745	52.7007	41.5965	44.4786	85.0902	87.7244	87.0034	39.8977	40.5523	42.6469	47.1628	48.9053	50.8091	Hadha	hydroxyacyl-Coenzyme_A_dehydrogenase/3-ketoacyl-Coenzyme_A_thiolase/enoyl-Coenzyme_A_hydratase_(trifunctional_protein)_alpha_subunit
ENSMUSG00000030688	122.933	88.6103	98.3859	77.6732	87.5601	77.8795	112.433	111.28	102.611	118.812	118.68	118.752	Stard10	START_domain_containing_10
ENSMUSG00000019173	101.378	88.6977	93.662	90.9994	87.4931	91.1531	123.108	115.704	116.393	143.147	137.895	135.95	Rab5c	RAB5C_member_RAS_oncogene_family
ENSMUSG00000022443	157.475	116.515	131.588	85.3727	87.2664	87.6158	91.8867	95.2632	106.892	70.6565	76.9491	75.8993	Myh9	myosin_heavy_polypeptide_9_non-muscle
ENSMUSG00000052997	66.2616	87.4276	90.7318	81.1832	87.1306	78.4634	76.3156	73.8994	76.19	74.0906	80.5592	74.9474	Uba2	ubiquitin-like_modifier_activating_enzyme_2
ENSMUSG00000031729	41.1818	49.7147	51.0424	91.2754	87.0891	86.5136	44.1083	43.8412	40.7474	57.3077	59.7378	60.335	Ist1	increased_sodium_tolerance_1_homolog_(yeast)
ENSMUSG00000037916	122.093	114.323	111.681	85.8833	87.0841	90.9524	99.719	98.1697	93.452	77.3405	79.8803	81.6208	Ndufv1	NADH_dehydrogenase_(ubiquinone)_flavoprotein_1
ENSMUSG00000035202	223.203	101.258	108.825	102.204	87.0229	127.282	55.679	62.4329	63.7219	107.573	97.1166	78.7786	Lars2	leucyl-tRNA_synthetase_mitochondrial
ENSMUSG00000062248	101.055	146.44	135.353	79.18	86.9951	79.5569	108.396	110.921	107.745	83.4613	86.1098	92.9721	Cks2	CDC28_protein_kinase_regulatory_subunit_2
ENSMUSG00000029169	65.5112	81.8548	86.8582	79.8741	86.9063	82.7481	72.2239	69.4359	74.2127	82.7057	81.1831	83.4028	Dhx15	DEAH_(Asp-Glu-Ala-His)_box_polypeptide_15
ENSMUSG00000063065	53.1194	54.5287	53.7269	81.9676	86.8647	90.2014	46.1306	43.9577	48.5414	41.4937	49.943	46.6442	Mapk3	mitogen-activated_protein_kinase_3
ENSMUSG00000068823	69.1909	68.9743	82.1655	80.1043	86.7322	81.0905	66.8152	75.8545	67.487	63.9892	73.4857	67.7906	Csde1	cold_shock_domain_containing_E1_RNA_binding
ENSMUSG00000032366	74.4939	87.8645	92.2957	77.7212	86.7188	89.2324	27.5496	27.0919	26.4764	13.4102	12.7529	14.6585	Tpm1	tropomyosin_1_alpha
ENSMUSG00000094392	29.7519	50.2295	42.1581	77.0933	86.4582	119.017	79.4595	91.0683	28.0969	85.6012	72.3928	58.9921	Gm3788	predicted_gene_3788
ENSMUSG00000020671	45.8726	48.1402	52.8055	84.0741	86.4372	81.2328	53.75	50.4644	52.1211	55.3207	60.9135	57.3599	Rab10	RAB10_member_RAS_oncogene_family
ENSMUSG00000021127	112.016	117.835	87.1608	97.5033	86.3806	80.7794	155.151	136.162	177.779	73.1131	84.2298	61.4279	Zfp36l1	zinc_finger_protein_36_C3H_type-like_1
ENSMUSG00000046971	3.37339	2.4882	2.2471	103.095	86.1207	101.984	2.5118	2.48105	5.42866	17.3544	18.3457	26.1739	Pla2g4f	phospholipase_A2_group_IVF
ENSMUSG00000025580	87.1752	103.454	108.875	84.0119	86.0354	87.7322	87.1737	87.0425	88.1659	79.4867	88.644	83.4758	Eif4a3	eukaryotic_translation_initiation_factor_4A3
ENSMUSG00000016534	26.5546	31.6297	27.7487	82.1004	85.9459	82.0337	37.5029	40.0455	42.9018	58.0603	55.4942	58.8574	Lamp2	lysosomal-associated_membrane_protein_2
ENSMUSG00000040725	139.342	109.792	130.256	83.8696	85.7954	82.3776	121.081	120.013	119.534	87.6947	87.7378	88.6514	Hnrnpul1	heterogeneous_nuclear_ribonucleoprotein_U-like_1
ENSMUSG00000051853	119.581	118.854	122.049	84.3499	85.7317	81.853	106.767	100.345	103.004	81.2495	82.9155	76.6022	Arf3	ADP-ribosylation_factor_3
ENSMUSG00000001783	96.5657	81.357	92.2343	73.7665	85.6882	78.5547	74.8319	77.7877	68.937	61.3848	63.6059	62.3951	Rtcb	RNA_2'3'-cyclic_phosphate_and_5'-OH_ligase
ENSMUSG00000040435	66.731	81.3718	50.2874	89.9756	85.6562	72.0998	76.5317	63.3288	80.2763	93.1156	113.737	95.1261	Ppp1r15a	protein_phosphatase_1_regulatory_(inhibitor)_subunit_15A
ENSMUSG00000029030	50.7925	43.7325	51.3276	87.3353	85.621	87.9475	46.3898	44.5228	41.9776	60.921	62.2806	62.0687	Tprgl	transformation_related_protein_63_regulated_like
ENSMUSG00000053332	62.2205	83.4907	68.3666	92.2947	85.5424	101.557	64.7085	72.7608	89.4985	120.512	89.0774	140.529	Gas5	growth_arrest_specific_5
ENSMUSG00000037772	125.025	127.258	113.165	78.0886	85.5068	81.0409	116.567	117.998	105.242	77.8609	81.5915	74.2119	Mrpl23	mitochondrial_ribosomal_protein_L23
ENSMUSG00000021877	41.3808	59.6022	60.9102	83.9576	85.4612	76.471	49.5475	50.5206	48.9244	61.5708	70.6654	63.0448	Arf4	ADP-ribosylation_factor_4
ENSMUSG00000052305	24.8171	14.8676	40.9564	146.362	85.4351	119.372	17.0051	4.96847	7.42721	32.972	15.04	25.2223	Hbb-bs	hemoglobin_beta_adult_s_chain
ENSMUSG00000000532	41.2703	49.7726	41.9318	90.477	85.3952	74.8176	41.1162	36.8247	35.0792	51.5278	41.8167	53.7995	Acvr1b	activin_A_receptor_type_1B
ENSMUSG00000030341	80.8836	63.4082	59.0229	82.5078	85.232	86.6613	73.2678	74.6062	83.6461	66.3626	68.2588	69.5415	Tnfrsf1a	tumor_necrosis_factor_receptor_superfamily_member_1a
ENSMUSG00000009549	45.5243	68.851	60.7214	80.9167	85.1814	86.4556	53.67	56.3974	63.5929	68.0805	76.2866	68.3914	Srp14	signal_recognition_particle_14
ENSMUSG00000003271	6.12619	3.17188	4.04441	94.4829	84.9705	103.415	8.57292	7.30437	12.8318	55.0231	60.8434	56.2033	Sult2b1	sulfotransferase_family_cytosolic_2B_member_1
ENSMUSG00000030105	29.9666	34.0513	39.8911	81.2918	84.83	79.0997	32.1312	31.6977	32.7694	48.4523	53.1664	52.7071	Arl8b	ADP-ribosylation_factor-like_8B
ENSMUSG00000062611	27.0995	47.2009	38.7589	28.3222	84.7224	97.5815	88.0375	86.3078	41.5397	103.34	121.642	90.2018	Rps3a2	ribosomal_protein_S3A2
ENSMUSG00000024360	49.6017	64.5193	64.7062	83.7038	84.7049	78.3914	58.5074	56.8524	59.327	72.0019	76.1735	75.5017	Etf1	eukaryotic_translation_termination_factor_1
ENSMUSG00000029390	44.5748	44.6979	46.9714	78.989	84.5489	82.8854	46.5301	49.2379	45.4314	64.0293	62.3333	65.737	Tmed2	transmembrane_emp24_domain_trafficking_protein_2
ENSMUSG00000003345	158.484	137.065	136.72	80.908	84.5105	89.4357	117.656	111.676	111.908	78.4302	81.1501	81.9804	Csnk1g2	casein_kinase_1_gamma_2
ENSMUSG00000027376	10.4359	8.38885	7.60661	81.2757	84.4314	89.853	10.3715	8.29829	12.1455	55.4306	49.1285	57.6969	Prom2	prominin_2
ENSMUSG00000041084	77.445	83.264	85.6999	78.0405	84.4092	85.7969	67.2176	78.8126	74.128	66.2595	74.8353	72.1602	Ostc	oligosaccharyltransferase_complex_subunit
ENSMUSG00000049760	74.9717	93.1441	86.9619	91.534	84.3695	90.9164	59.1999	70.1626	78.6332	73.8937	77.0128	70.3237	2410015M20Rik	RIKEN_cDNA_2410015M20_gene
ENSMUSG00000030214	27.1409	23.1947	21.8932	85.5795	84.3327	88.0449	47.4904	45.5	45.3997	72.143	72.1353	79.011	Plbd1	phospholipase_B_domain_containing_1
ENSMUSG00000027067	141.465	137.219	152.921	78.2148	84.2619	79.2501	122.932	124.12	121.833	91.9073	93.2132	89.7773	Ssrp1	structure_specific_recognition_protein_1
ENSMUSG00000006777	3.00701	1.90132	1.78316	88.3172	84.1676	97.9043	2.38632	3.98216	5.27039	1.57793	5.26995	3.39588	Krt23	keratin_23
ENSMUSG00000028967	56.3964	70.4456	45.2866	73.979	84.0991	87.4711	70.0721	62.6587	72.1584	64.2925	88.4069	69.8593	Errfi1	ERBB_receptor_feedback_inhibitor_1
ENSMUSG00000029550	40.92	42.9819	40.1604	85.5694	83.8008	84.5881	51.4354	47.8395	45.6253	63.1066	62.8246	71.1177	Sppl3	signal_peptide_peptidase_3
ENSMUSG00000001794	135.3	119.276	119.463	78.0561	83.7877	90.4473	126.59	122.974	126.085	29.2734	27.5071	30.7071	Capns1	calpain_small_subunit_1
ENSMUSG00000067847	73.8171	79.3993	82.2167	80.7046	83.6842	96.7546	57.7443	60.5865	65.9276	66.163	82.0761	69.5123	Romo1	reactive_oxygen_species_modulator_1
ENSMUSG00000018326	95.4943	84.069	94.2704	83.8	83.6786	83.1025	79.8155	84.5033	79.1098	80.1538	86.3446	78.8485	Ywhab	tyrosine_3-monooxygenase/tryptophan_5-monooxygenase_activation_protein_beta_polypeptide
ENSMUSG00000034926	45.8045	45.6757	47.6276	75.2478	83.3163	86.6198	23.968	19.428	25.0236	32.2928	24.2377	33.2895	Dhcr24	24-dehydrocholesterol_reductase
ENSMUSG00000021520	40.4782	64.5329	81.2721	76.1906	83.0727	80.6396	53.5121	67.6475	68.7862	72.2509	77.0008	80.8578	Uqcrb	ubiquinol-cytochrome_c_reductase_binding_protein
ENSMUSG00000017221	98.2204	83.6303	94.5701	84.8073	83.0228	86.1399	79.8164	80.8362	86.1628	79.636	78.9944	82.9736	Psmd3	proteasome_(prosome_macropain)_26S_subunit_non-ATPase_3
ENSMUSG00000027613	118.69	104.773	116.327	79.8113	83.0208	87.8589	132.936	126.956	118.923	119.408	109.726	118.283	Eif6	eukaryotic_translation_initiation_factor_6
ENSMUSG00000005312	65.5182	58.316	62.7561	80.9304	83.0057	75.6548	69.2737	67.9722	70.3168	91.9893	100.73	93.5242	Ubqln1	ubiquilin_1
ENSMUSG00000025868	71.2656	74.1821	70.0793	80.0447	82.9297	75.1678	65.8484	66.8958	67.6703	60.8967	62.6834	66.1637	Higd2a	HIG1_domain_family_member_2A
ENSMUSG00000042423	26.1065	30.7124	28.835	85.8823	82.7648	86.4174	23.6579	23.562	24.4253	46.993	45.9447	53.589	Fbrs	fibrosin
ENSMUSG00000022512	17.9338	14.6237	14.9388	83.0701	82.7509	79.5599	25.7075	30.3571	22.6756	48.4726	49.2766	54.91	Cldn1	claudin_1
ENSMUSG00000021737	75.346	71.6445	84.5649	75.3361	82.7444	81.1585	69.9382	80.4913	70.255	84.398	83.9646	85.6144	Psmd6	proteasome_(prosome_macropain)_26S_subunit_non-ATPase_6
ENSMUSG00000030647	120.867	118.426	122.056	79.4115	82.5926	84.4819	79.8085	79.0604	97.225	75.1162	77.7352	80.3557	Ndufc2	NADH_dehydrogenase_(ubiquinone)_1_subcomplex_unknown_2
ENSMUSG00000004285	66.299	71.5474	74.1569	77.612	82.4068	80.143	61.6156	62.4442	64.0602	59.9014	65.6805	59.0266	Atp6v1f	ATPase_H+_transporting_lysosomal_V1_subunit_F
ENSMUSG00000071659	116.259	111.287	125.412	82.2923	82.0974	83.3646	104.223	94.7376	103.421	88.7717	86.4303	88.5574	Hnrnpul2	heterogeneous_nuclear_ribonucleoprotein_U-like_2
ENSMUSG00000069833	35.4954	28.405	22.8394	81.7699	82.0674	65.0783	50.4508	38.8595	38.0182	62.0895	64.2461	72.921	Ahnak	AHNAK_nucleoprotein_(desmoyokin)
ENSMUSG00000031068	113.989	100.902	103.015	77.4884	82.0494	78.7945	75.3926	88.1807	84.619	69.3229	77.3669	71.6534	Glrx3	glutaredoxin_3
ENSMUSG00000029538	124.525	143.761	160.033	79.2546	82.0394	80.3536	114.197	112.458	112.609	78.1981	81.5787	76.2124	Srsf9	serine/arginine-rich_splicing_factor_9
ENSMUSG00000029817	53.3162	78.6831	76.6636	80.6569	81.8927	78.4073	64.8325	65.6386	72.1174	71.7637	74.2183	70.9494	Tra2a	transformer_2_alpha_homolog_(Drosophila)
ENSMUSG00000021359	62.8179	65.4757	65.4399	75.2925	81.7142	78.5511	85.0414	93.4694	102.341	112.868	92.2134	116.049	Tfap2a	transcription_factor_AP-2_alpha
ENSMUSG00000072235	51.832	50.8662	65.3106	75.4118	81.3046	103.313	41.3218	36.6176	45.5529	22.1234	17.2135	15.8548	Tuba1a	tubulin_alpha_1A
ENSMUSG00000052429	192.947	199.748	206.288	75.9511	81.2894	82.5104	137.176	135.196	138.996	89.4334	100.452	91.9921	Prmt1	protein_arginine_N-methyltransferase_1
ENSMUSG00000020803	139.968	150.506	150.562	75.4822	81.1782	79.036	135.227	147.16	133.814	110.864	115.442	106.839	Txndc17	thioredoxin_domain_containing_17
ENSMUSG00000038845	118.253	109.91	103.424	85.5997	80.9711	88.0022	68.7706	71.2133	74.083	63.5078	66.9334	76.8936	Phb	prohibitin
ENSMUSG00000041782	41.0128	23.9862	27.6835	79.7116	80.8936	87.814	87.1983	82.5772	85.1033	99.1106	90.3488	96.5344	Lad1	ladinin
ENSMUSG00000005510	94.7738	86.5832	88.9629	83.7067	80.8253	83.3424	80.371	76.8886	78.4979	72.6086	75.201	80.0719	Ndufs3	NADH_dehydrogenase_(ubiquinone)_Fe-S_protein_3
ENSMUSG00000006378	72.4712	50.3975	57.6901	82.868	80.8021	73.7641	81.5929	78.2868	86.5593	195.047	205.38	205.248	Gcat	glycine_C-acetyltransferase_(2-amino-3-ketobutyrate-coenzyme_A_ligase)
ENSMUSG00000061479	96.8228	107.583	101.106	75.7769	80.7666	90.5094	86.2994	77.5869	90.127	82.4816	83.7965	82.0243	Snrpa	small_nuclear_ribonucleoprotein_polypeptide_A
ENSMUSG00000006315	72.0013	70.4926	71.0228	80.0823	80.7189	84.6633	61.1051	71.1621	73.4966	85.9308	81.1208	96.61	Tmem147	transmembrane_protein_147
ENSMUSG00000054905	174.216	12.9186	16.3793	103.995	80.6656	51.6553	1646.86	1895.49	1705.64	5984.92	5383.13	5395.05	Stfa3	stefin_A3
ENSMUSG00000086583	55.4188	51.4098	53.1788	75.586	80.5828	82.413	53.1029	65.1845	55.7917	49.2103	57.2123	55.3139	Gm15500	predicted_pseudogene_15500
ENSMUSG00000053317	70.6861	82.5434	91.3722	75.8547	80.5097	85.1284	67.2053	76.214	85.3362	68.7995	69.7271	76.3341	Sec61b	Sec61_beta_subunit
ENSMUSG00000060992	82.1121	70.7612	79.1941	82.6629	80.3203	79.621	73.4369	75.2477	70.6674	71.5345	73.2278	67.6351	Copz1	coatomer_protein_complex_subunit_zeta_1
ENSMUSG00000074277	29.3336	26.4584	30.4478	79.9462	80.3103	92.6404	28.9452	28.5806	34.8524	42.0605	42.4756	43.2103	Phldb3	pleckstrin_homology-like_domain_family_B_member_3
ENSMUSG00000079477	64.1688	60.6802	62.3955	78.4708	80.0499	72.2639	59.0701	58.462	64.6871	74.1369	73.3448	73.9184	Rab7	RAB7_member_RAS_oncogene_family
ENSMUSG00000024981	32.9649	31.3189	29.4608	73.6104	79.8541	76.6493	32.2378	31.4046	30.889	59.3247	59.5651	68.4921	Acsl5	acyl-CoA_synthetase_long-chain_family_member_5
ENSMUSG00000021282	46.8533	69.2254	78.1426	80.5802	79.853	84.7492	61.538	66.3858	63.7662	79.0141	75.0066	93.3123	Eif5	eukaryotic_translation_initiation_factor_5
ENSMUSG00000001964	65.9578	73.072	70.4301	78.1548	79.6905	84.3173	52.8318	54.5286	56.6501	57.0326	63.3427	61.546	Emd	emerin
ENSMUSG00000021114	33.4795	30.8868	32.8013	73.1855	79.6872	69.079	27.0151	29.3226	29.1954	35.5259	35.1238	34.3104	Atp6v1d	ATPase_H+_transporting_lysosomal_V1_subunit_D
ENSMUSG00000024942	35.7666	19.4135	22.7671	84.2449	79.6688	81.3988	78.9468	75.21	65.4952	91.853	83.9879	84.0041	Capn1	calpain_1
ENSMUSG00000027195	47.2878	45.8755	45.1902	76.2998	79.6518	76.4599	51.093	49.3978	57.1594	59.9891	62.6312	68.2696	Hsd17b12	hydroxysteroid_(17-beta)_dehydrogenase_12
ENSMUSG00000037197	103.145	112.194	122.291	76.0281	79.5668	79.0413	89.8094	85.0173	85.6011	72.3858	73.0519	72.9741	Rbm17	RNA_binding_motif_protein_17
ENSMUSG00000039208	15.5394	13.1023	13.6897	79.1906	79.5582	80.2318	15.994	13.6828	18.4935	50.3253	41.024	54.1653	Metrnl	meteorin_glial_cell_differentiation_regulator-like
ENSMUSG00000037868	40.4507	44.8634	27.5684	78.1183	79.4288	76.1244	55.8896	53.0925	55.7782	88.0294	91.8801	83.9339	Egr2	early_growth_response_2
ENSMUSG00000021361	77.1647	86.8343	83.1689	75.104	79.0777	92.0384	67.8559	77.6768	74.461	71.0361	73.6382	69.433	Tmem14c	transmembrane_protein_14C
ENSMUSG00000022436	86.2902	104.106	96.2791	77.9832	78.916	82.6056	84.8392	82.486	91.7148	72.5487	68.4926	67.3458	Sh3bp1	SH3-domain_binding_protein_1
ENSMUSG00000060636	96.3183	79.3021	94.1813	64.27	78.7134	77.2439	71.9667	79.5772	90.8516	68.8421	75.7149	59.8985	Rpl35a	ribosomal_protein_L35A
ENSMUSG00000027342	154.339	200.878	199.747	76.9389	78.6115	80.3009	194.33	203.532	198.862	82.103	82.9569	76.3828	Pcna	proliferating_cell_nuclear_antigen
ENSMUSG00000028266	80.2675	87.5098	78.1301	70.1592	78.6026	65.8519	93.6946	101.386	96.0474	78.1172	87.7437	87.6899	Lmo4	LIM_domain_only_4
ENSMUSG00000024097	59.2847	100.884	98.3832	76.7498	78.5852	80.4935	66.6462	74.318	72.2409	75.8502	72.1066	79.0402	Srsf7	serine/arginine-rich_splicing_factor_7
ENSMUSG00000005881	82.5005	88.8709	75.4267	75.5192	78.4749	79.0906	76.4877	71.4396	77.9031	62.1822	62.5898	56.7794	Ergic3	ERGIC_and_golgi_3
ENSMUSG00000075706	150.11	148.136	142.834	83.6404	78.3757	87.8151	128.533	143.464	145.185	72.8354	75.8436	72.3124	Gpx4	glutathione_peroxidase_4
ENSMUSG00000029998	57.0083	48.1698	46.4703	76.0865	78.2776	74.0924	45.5536	46.4388	45.2097	69.5179	67.6078	72.9663	Pcyox1	prenylcysteine_oxidase_1
ENSMUSG00000021054	10.4528	10.0108	10.0135	80.3724	78.2467	80.7078	12.5141	13.9904	17.3698	30.8994	34.4265	35.5588	Sgpp1	sphingosine-1-phosphate_phosphatase_1
ENSMUSG00000042363	13.5266	15.4823	17.1293	77.7697	78.215	84.7735	16.9578	15.7211	19.1694	26.128	26.9693	26.7059	Lgalsl	lectin_galactoside_binding-like
ENSMUSG00000016427	104.967	119.026	117.099	72.182	78.0424	80.2423	80.5973	94.1375	117.667	82.2714	76.7665	82.2013	Ndufa1	NADH_dehydrogenase_(ubiquinone)_1_alpha_subcomplex_1
ENSMUSG00000032562	156.57	127.961	140.097	77.1968	78.0266	83.4846	128.916	124.582	124.73	82.2283	79.1314	70.0679	Gnai2	guanine_nucleotide_binding_protein_(G_protein)_alpha_inhibiting_2
ENSMUSG00000043962	97.5962	91.4672	104.653	77.8098	77.9762	74.2518	82.064	84.5722	77.244	76.6434	73.7996	77.1774	Thrap3	thyroid_hormone_receptor_associated_protein_3
ENSMUSG00000053898	65.4336	49.5833	57.707	85.9348	77.925	81.8565	53.527	53.0792	51.7489	75.576	90.2373	79.2133	Ech1	enoyl_coenzyme_A_hydratase_1_peroxisomal
ENSMUSG00000003752	41.4211	28.3956	20.2206	82.5733	77.9175	72.7133	64.4339	47.5826	81.7469	147.42	181.596	117.044	Itpkc	inositol_145-trisphosphate_3-kinase_C
ENSMUSG00000031633	161.919	166.2	172.961	75.231	77.8924	79.6209	109.2	116.364	105.957	80.2429	85.2328	81.6295	Slc25a4	solute_carrier_family_25_(mitochondrial_carrier_adenine_nucleotide_translocator)_member_4
ENSMUSG00000035674	77.7824	77.5483	87.2035	74.9661	77.8528	80.6861	62.8969	61.1325	80.9239	66.6378	61.6319	64.5629	Ndufa3	NADH_dehydrogenase_(ubiquinone)_1_alpha_subcomplex_3
ENSMUSG00000034634	28.9069	3.32345	4.16005	93.0906	77.7801	68.759	122.714	89.1722	162.41	1172.41	1108.25	1239.62	Ly6d	lymphocyte_antigen_6_complex_locus_D
ENSMUSG00000019818	56.9255	85.884	86.0756	76.18	77.721	77.4327	77.352	79.9941	79.6757	71.5944	73.245	76.1625	Cd164	CD164_antigen
ENSMUSG00000034932	81.6271	87.0798	92.9094	79.9504	77.6283	84.9446	56.0426	62.8877	64.1904	67.2519	65.6282	66.9226	Mrpl54	mitochondrial_ribosomal_protein_L54
ENSMUSG00000068882	50.5108	75.1276	83.4471	80.1493	77.5827	78.6451	58.5481	63.5102	66.5073	67.0274	68.6549	67.2786	Ssb	Sjogren_syndrome_antigen_B
ENSMUSG00000027984	31.3765	29.9767	33.4247	76.6387	77.4611	73.2917	25.452	23.8807	25.0702	54.1995	62.9389	58.6488	Hadh	hydroxyacyl-Coenzyme_A_dehydrogenase
ENSMUSG00000038014	68.8448	80.3788	80.1487	75.7341	77.4268	71.8294	75.1946	70.9135	75.0982	74.5642	78.4055	78.7693	Fam120a	family_with_sequence_similarity_120_member_A
ENSMUSG00000036835	36.2437	49.0235	41.2645	78.5667	77.306	82.4918	50.7658	44.6784	43.076	59.419	63.1606	65.2963	Psenen	presenilin_enhancer_2_homolog_(C._elegans)
ENSMUSG00000040048	126.406	135.125	137.19	79.6602	77.1933	83.4425	116.95	133.276	137.62	94.4495	98.8906	95.1565	Ndufb10	NADH_dehydrogenase_(ubiquinone)_1_beta_subcomplex_10
ENSMUSG00000020088	66.8054	63.3054	63.3119	73.8635	77.1343	74.6208	57.1067	57.9342	52.0432	55.4157	57.2522	56.7576	Sar1a	SAR1_gene_homolog_A_(S._cerevisiae)
ENSMUSG00000001289	69.7817	73.9529	77.494	73.5697	77.0913	79.2643	55.7039	69.9734	61.9136	44.7501	50.7701	44.2687	Pfdn5	prefoldin_5
ENSMUSG00000006273	35.2316	36.1088	35.3287	76.0657	76.8466	78.0931	30.7853	30.4937	29.4774	52.3953	57.5681	59.0244	Atp6v1b2	ATPase_H+_transporting_lysosomal_V1_subunit_B2
ENSMUSG00000027091	57.565	65.9511	72.7555	74.8824	76.7604	72.1322	51.6618	53.4946	60.2861	60.7823	68.3464	61.7284	Zc3h15	zinc_finger_CCCH-type_containing_15
ENSMUSG00000024590	151.281	167.372	184.68	71.1161	76.7189	74.1897	141.898	144.22	137.783	62.026	64.6374	60.6818	Lmnb1	lamin_B1
ENSMUSG00000041375	27.28	34.1713	27.8854	73.8565	76.6931	95.2313	27.9527	25.7742	33.5592	46.1081	43.1446	50.0142	Ccdc9	coiled-coil_domain_containing_9
ENSMUSG00000051391	52.3025	61.2328	57.5426	78.0881	76.6367	75.5184	45.9827	43.4216	43.9785	54.9072	58.6783	53.0758	Ywhag	tyrosine_3-monooxygenase/tryptophan_5-monooxygenase_activation_protein_gamma_polypeptide
ENSMUSG00000082908	55.6282	55.4926	62.3708	65.1507	76.627	70.0987	39.2586	57.3725	28.9176	51.7916	13.6507	79.9848	Gm13736	predicted_gene_13736
ENSMUSG00000019087	51.2142	41.3732	39.6362	77.0269	76.4447	74.8338	50.8011	48.4531	54.4977	72.1769	64.0507	80.2355	Atp6ap1	ATPase_H+_transporting_lysosomal_accessory_protein_1
ENSMUSG00000078429	171.702	154.195	159.707	72.4805	76.4333	75.3664	152.938	144.313	143.258	91.1288	95.7617	88.4501	Ctdsp2	CTD_(carboxy-terminal_domain_RNA_polymerase_II_polypeptide_A)_small_phosphatase_2
ENSMUSG00000027315	39.1911	38.0305	33.2435	81.2633	76.3228	76.3021	27.2789	23.7035	27.7633	38.8339	38.832	44.0401	Spint1	serine_protease_inhibitor_Kunitz_type_1
ENSMUSG00000006398	116.882	129.912	131.757	75.3436	76.3101	79.3249	122.579	110.147	122.022	73.4175	76.9032	81.54	Cdc20	cell_division_cycle_20
ENSMUSG00000030541	136.145	137.739	133.764	72.2314	76.248	71.5874	127.69	121.834	119.832	101.977	105.484	91.0405	Idh2	isocitrate_dehydrogenase_2_(NADP+)_mitochondrial
ENSMUSG00000020153	85.9488	109.825	95.1291	75.1748	76.2185	80.4507	77.6003	78.6866	81.5851	71.9814	76.7695	84.008	Ndufs7	NADH_dehydrogenase_(ubiquinone)_Fe-S_protein_7
ENSMUSG00000015461	77.3525	77.5632	72.5887	79.4806	76.2147	78.0321	78.3756	74.9982	86.1532	72.2373	66.4925	75.5967	Atf6b	activating_transcription_factor_6_beta
ENSMUSG00000069744	65.9862	71.1819	77.403	77.1306	76.0859	82.9317	69.0597	69.9215	70.9341	77.7166	82.9393	83.4081	Psmb3	proteasome_(prosome_macropain)_subunit_beta_type_3
ENSMUSG00000020547	106.855	95.4225	99.6502	66.8843	76.0691	73.1907	78.7332	82.4922	79.5453	69.093	74.4102	74.4542	Bzw2	basic_leucine_zipper_and_W2_domains_2
ENSMUSG00000063904	55.2591	47.7044	49.2071	73.5347	76.0604	81.258	45.0606	44.8831	43.3866	53.7596	57.1951	58.4724	Dpp3	dipeptidylpeptidase_3
ENSMUSG00000031167	73.4698	99.8498	99.0245	72.1262	76.0146	75.6701	78.0507	82.9983	83.5691	68.6464	70.2121	68.1413	Rbm3	RNA_binding_motif_protein_3
ENSMUSG00000037361	43.2316	61.4544	63.2075	76.8539	75.9543	77.5576	49.8849	50.7637	50.9881	66.1266	75.5864	66.2256	Sf3b6	splicing_factor_3B_subunit_6
ENSMUSG00000062300	46.7148	44.4989	37.122	84.1163	75.8756	73.4661	27.9924	22.9451	36.1553	26.2397	25.5755	34.8648	Pvrl2	poliovirus_receptor-related_2
ENSMUSG00000030663	100.244	115.839	124.051	69.5612	75.8224	67.556	105.65	111.664	109.394	73.6706	77.8603	69.3791	1110004F10Rik	RIKEN_cDNA_1110004F10_gene
ENSMUSG00000000743	63.7931	56.5776	52.8965	71.3944	75.5386	75.8003	50.1449	48.6963	52.2396	59.9115	61.6152	56.1877	Chmp1a	charged_multivesicular_body_protein_1A
ENSMUSG00000013160	34.6935	31.001	32.9538	67.1476	75.4025	67.1009	27.3645	29.8309	27.2046	49.4691	56.0717	55.9637	Atp6v0d1	ATPase_H+_transporting_lysosomal_V0_subunit_D1
ENSMUSG00000047187	62.6828	71.2635	73.0279	74.2755	75.3992	77.7822	70.3326	70.1774	62.9413	68.992	73.9489	69.8362	Rab2a	RAB2A_member_RAS_oncogene_family
ENSMUSG00000032966	108.979	110.056	126.885	71.4623	75.3345	73.4584	99.4725	100.835	99.7573	69.3181	68.5154	71.4302	Fkbp1a	FK506_binding_protein_1a
ENSMUSG00000003402	99.5637	98.288	84.1364	75.1474	75.2355	74.0803	78.8871	78.123	88.778	61.5132	56.873	67.5767	Prkcsh	protein_kinase_C_substrate_80K-H
ENSMUSG00000073838	97.8678	86.7919	87.0219	75.5823	75.2349	76.1179	78.1844	74.7119	69.9259	66.7707	69.2224	71.3003	Tufm	Tu_translation_elongation_factor_mitochondrial
ENSMUSG00000028843	61.3841	59.8463	68.699	72.9988	75.2036	72.2806	57.8033	52.1845	69.0529	69.0503	73.1228	63.1374	Sh3bgrl3	SH3_domain_binding_glutamic_acid-rich_protein-like_3
ENSMUSG00000063870	89.0458	80.2766	89.833	72.265	75.1639	68.3533	70.3887	68.3799	70.9747	53.159	56.5344	57.9612	Chd4	chromodomain_helicase_DNA_binding_protein_4
ENSMUSG00000068749	81.3952	94.8118	97.5875	74.4512	75.137	74.6341	67.7875	78.0276	77.6662	72.2808	78.0065	70.6924	Psma5	proteasome_(prosome_macropain)_subunit_alpha_type_5
ENSMUSG00000034165	82.1254	84.3183	82.5133	78.4851	75.0735	82.4599	69.0482	65.586	69.4889	51.181	54.5797	49.9756	Ccnd3	cyclin_D3
ENSMUSG00000024767	101.528	88.0629	108.114	68.8431	75.0191	72.0454	79.4825	87.2644	85.7295	56.5511	53.3664	49.9185	Otub1	OTU_domain_ubiquitin_aldehyde_binding_1
ENSMUSG00000015994	60.1748	55.7971	55.1251	69.4779	74.9822	67.5255	45.1571	44.011	45.0332	52.2528	56.0302	51.7559	Fnta	farnesyltransferase_CAAX_box_alpha
ENSMUSG00000035064	27.8545	16.9182	19.4836	82.506	74.9522	74.2716	38.2154	35.188	37.638	84.1885	77.6245	89.3329	Eef2k	eukaryotic_elongation_factor-2_kinase
ENSMUSG00000024042	106.058	82.6852	66.2947	78.935	74.8155	65.8498	150.957	134.017	178.641	126.099	113.96	122.05	Sik1	salt_inducible_kinase_1
ENSMUSG00000036299	47.5937	50.9156	49.4305	70.0982	74.808	72.1452	42.1962	48.1837	54.0326	59.8798	57.4547	61.7903	BC031181	cDNA_sequence_BC031181
ENSMUSG00000024091	59.4817	68.4093	71.6224	72.9981	74.6894	68.9964	71.0775	74.077	68.2232	76.7329	82.3805	77.6804	Vapa	vesicle-associated_membrane_protein_associated_protein_A
ENSMUSG00000068039	98.266	98.1357	100.573	69.2195	74.5235	68.6023	79.3316	84.044	80.4285	69.029	72.3071	68.9324	Tcp1	t-complex_protein_1
ENSMUSG00000019804	95.7475	96.2329	96.9871	79.4065	74.4948	74.0985	74.0431	71.3701	77.9989	76.0815	83.63	76.0868	Snx3	sorting_nexin_3
ENSMUSG00000035557	456.541	169.123	211.102	80.9244	74.1509	108.58	833.582	775.673	892.696	626.602	630.06	362.718	Krt17	keratin_17
ENSMUSG00000036478	43.2788	41.6249	40.976	69.1916	74.1041	70.4094	55.7723	61.3856	50.7481	50.357	48.0074	44.2675	Btg1	B_cell_translocation_gene_1_anti-proliferative
ENSMUSG00000008690	92.2111	82.6002	83.2537	71.9469	73.9416	74.0287	73.5036	70.3224	69.2787	57.9522	57.5881	60.5262	Ncaph2	non-SMC_condensin_II_complex_subunit_H2
ENSMUSG00000027455	73.2389	88.9577	94.2606	73.1228	73.8801	76.6059	64.4055	66.1908	63.9139	68.8134	64.4097	63.2267	Nsfl1c	NSFL1_(p97)_cofactor_(p47)
ENSMUSG00000056737	74.5165	54.6018	69.7298	66.9335	73.8539	68.5848	96.9689	96.2424	102.353	64.7244	60.9356	57.5986	Capg	capping_protein_(actin_filament)_gelsolin-like
ENSMUSG00000021807	65.127	58.7285	70.6649	72.1389	73.8153	74.3079	56.6741	64.886	60.1476	53.7348	61.3781	54.5195	2700060E02Rik	RIKEN_cDNA_2700060E02_gene
ENSMUSG00000020844	155.299	147.086	139.399	76.1139	73.7375	72.8965	101.495	101.308	93.9268	55.8485	55.6068	57.241	Nxn	nucleoredoxin
ENSMUSG00000062353	84.3473	390.197	4.98122	142.245	73.5477	81.666	3.08404	1.89113	2.97898	129.79	180.296	169.755	Gm15772	predicted_gene_15772
ENSMUSG00000029621	51.6027	49.3958	51.552	74.9974	73.2714	76.6117	38.4329	37.922	39.7412	49.6196	54.4223	51.8293	Arpc1a	actin_related_protein_2/3_complex_subunit_1A
ENSMUSG00000026260	82.0182	74.4201	73.8478	73.5645	73.1948	77.5333	64.7673	65.9997	65.9779	62.3479	70.7109	67.4944	Ndufa10	NADH_dehydrogenase_(ubiquinone)_1_alpha_subcomplex_10
ENSMUSG00000031762	223.544	394.068	347.69	74.6134	73.1443	65.9513	278.251	248.296	258.813	350.696	400.97	336.111	Mt2	metallothionein_2
ENSMUSG00000027852	52.7255	49.2263	56.0128	69.4696	72.9701	72.1875	46.7922	47.9379	45.6922	50.0206	47.543	52.5826	Nras	neuroblastoma_ras_oncogene
ENSMUSG00000022437	133.31	120.968	124.467	72.0704	72.9547	70.0244	104.774	102.959	98.5475	71.3333	77.0274	71.2915	Samm50	sorting_and_assembly_machinery_component_50_homolog_(S._cerevisiae)
ENSMUSG00000037965	13.798	21.234	17.2844	71.6901	72.8504	77.8295	16.2347	16.1899	19.31	37.3005	31.0628	43.3126	Zc3h7a	zinc_finger_CCCH_type_containing_7_A
ENSMUSG00000030127	63.9263	68.9877	69.5043	74.2375	72.842	74.2354	65.5092	60.7826	66.245	79.576	78.5258	82.2066	Cops7a	COP9_(constitutive_photomorphogenic)_homolog_subunit_7a_(Arabidopsis_thaliana)
ENSMUSG00000037364	102.783	106.935	101.696	70.7767	72.7857	77.9597	82.1002	79.0568	88.0526	73.4293	66.7005	70.2814	Srrt	serrate_RNA_effector_molecule_homolog_(Arabidopsis)
ENSMUSG00000026966	57.7088	71.2375	69.8039	72.4039	72.7855	77.4692	61.9247	63.0862	62.4881	53.1025	62.8194	59.2289	Ssna1	Sjogren's_syndrome_nuclear_autoantigen_1
ENSMUSG00000013701	89.087	90.6427	92.2644	70.3465	72.7786	77.3002	71.7709	73.8096	77.9841	71.7076	75.3206	73.7986	Timm23	translocase_of_inner_mitochondrial_membrane_23
ENSMUSG00000029623	112.71	92.9735	104.648	70.9727	72.6859	71.0193	78.3282	83.7317	90.6447	71.0445	76.9805	73.5139	Pdap1	PDGFA_associated_protein_1
ENSMUSG00000019132	49.5612	61.1773	58.3948	74.4073	72.4645	72.3807	56.2287	57.4811	57.2293	65.8808	69.2259	68.7394	BC005537	cDNA_sequence_BC005537
ENSMUSG00000027423	73.3777	83.3515	84.1475	74.5271	72.3986	74.5785	57.8074	62.3058	62.7019	72.7871	72.5594	77.7913	Snx5	sorting_nexin_5
ENSMUSG00000027401	1.99962	1.70272	1.15344	67.9491	72.3945	74.5318	1.26828	1.25914	1.65663	4.1561	4.81186	5.57358	Tgm3	transglutaminase_3_E_polypeptide
ENSMUSG00000029777	56.3289	49.6599	53.2653	69.178	72.3332	70.8814	50.9505	51.8213	53.9309	70.4085	74.3222	74.3216	Gars	glycyl-tRNA_synthetase
ENSMUSG00000002980	680.684	610.368	583.07	66.6146	72.332	66.576	580.506	546.316	560.693	131.481	99.4858	122.946	Bcam	basal_cell_adhesion_molecule
ENSMUSG00000040463	122.085	118.737	127.087	70.9757	72.2813	75.0938	90.4905	87.9057	92.99	88.1952	91.2729	94.0574	Mybbp1a	MYB_binding_protein_(P160)_1a
ENSMUSG00000002778	67.2927	67.2962	64.8684	70.5637	72.2132	73.7173	61.9316	60.523	57.4769	59.6062	57.3207	56.4098	Kdelr1	KDEL_(Lys-Asp-Glu-Leu)_endoplasmic_reticulum_protein_retention_receptor_1
ENSMUSG00000022841	101.44	87.1148	90.4732	73.0277	72.2121	73.8394	81.9079	82.2447	79.0942	69.8903	73.924	65.4558	Ap2m1	adaptor-related_protein_complex_2_mu_1_subunit
ENSMUSG00000018166	26.0699	29.2028	24.408	74.136	72.1068	73.01	26.5283	23.7016	31.0691	54.6445	53.7145	59.3239	Erbb3	v-erb-b2_erythroblastic_leukemia_viral_oncogene_homolog_3_(avian)
ENSMUSG00000021832	46.8775	60.4523	68.6144	71.0019	72.0744	70.1452	53.7012	61.3343	58.8456	64.8977	74.1231	68.7451	Psmc6	proteasome_(prosome_macropain)_26S_subunit_ATPase_6
ENSMUSG00000027573	25.9452	27.5874	29.9564	71.4936	72.0696	72.2364	26.4223	25.3907	25.0053	37.7674	42.0769	39.707	Gid8	GID_complex_subunit_8_homolog_(S._cerevisiae)
ENSMUSG00000039220	61.4908	61.2733	42.821	66.1275	72.0428	55.9221	33.6232	33.1957	40.3244	33.3297	27.0393	45.8532	Ppp1r10	protein_phosphatase_1_regulatory_subunit_10
ENSMUSG00000049124	86.1391	96.956	105.027	54.586	72.001	71.3126	70.299	67.0337	79.3162	59.5366	49.9442	63.1487	Gm8186	predicted_gene_8186
ENSMUSG00000037373	158.778	146.188	156.829	69.5521	71.969	74.1505	143.413	134.725	122.609	84.1422	82.8848	81.119	Ctbp1	C-terminal_binding_protein_1
ENSMUSG00000044894	75.0657	80.8703	85.2655	63.8623	71.9397	71.9312	66.8954	70.0182	78.3709	70.4435	75.6425	77.2065	Uqcrq	ubiquinol-cytochrome_c_reductase_complex_III_subunit_VII
ENSMUSG00000079197	95.46	85.3434	96.0454	74.9295	71.9225	71.6129	89.9494	102.34	92.2791	81.7252	78.4453	81.8579	Psme2	proteasome_(prosome_macropain)_activator_subunit_2_(PA28_beta)
ENSMUSG00000093930	40.9202	51.4241	52.2927	66.7937	71.8977	60.4653	57.6714	52.5345	73.4959	95.6035	96.3651	82.0025	Hmgcs1	3-hydroxy-3-methylglutaryl-Coenzyme_A_synthase_1
ENSMUSG00000009863	100.992	83.3083	96.124	70.0054	71.8962	68.2052	78.5888	84.8101	91.0057	84.9226	81.6714	76.1959	Sdhb	succinate_dehydrogenase_complex_subunit_B_iron_sulfur_(Ip)
ENSMUSG00000021037	112.255	111.198	111.385	69.4922	71.8541	75.8823	85.388	90.0731	87.1453	93.4986	93.5265	93.7429	Ahsa1	AHA1_activator_of_heat_shock_protein_ATPase_1
ENSMUSG00000005469	71.0257	75.7767	78.4208	68.3673	71.8332	72.2894	52.1009	49.0938	49.4652	45.9575	52.7831	45.7083	Prkaca	protein_kinase_cAMP_dependent_catalytic_alpha
ENSMUSG00000021950	44.0981	29.4257	27.8794	87.998	71.7966	46.078	84.2566	85.5171	76.146	97.7117	66.1059	102.42	Anxa8	annexin_A8
ENSMUSG00000031078	67.9257	67.9528	71.5688	70.8246	71.7731	69.4938	65.8213	65.8273	60.9654	59.1393	56.8645	56.6066	Cttn	cortactin
ENSMUSG00000026553	48.0538	48.9184	51.3098	72.099	71.7152	71.2183	45.5835	39.9471	44.7345	53.4176	52.9742	52.6272	Copa	coatomer_protein_complex_subunit_alpha
ENSMUSG00000020393	43.7003	41.495	34.4181	71.7596	71.3412	67.519	38.6825	33.376	37.464	43.2466	42.7999	46.2923	Kremen1	kringle_containing_transmembrane_protein_1
ENSMUSG00000019494	102.828	82.5287	102.472	69.2499	71.2915	65.5013	77.8809	78.6444	88.0623	65.6546	69.4309	71.5191	Cops6	COP9_(constitutive_photomorphogenic)_homolog_subunit_6_(Arabidopsis_thaliana)
ENSMUSG00000024474	68.9463	63.1579	65.5082	67.5799	71.2025	70.8318	53.663	58.118	61.0046	57.8205	61.7218	55.3257	Ik	IK_cytokine
ENSMUSG00000031532	46.2532	44.229	37.419	73.8171	71.1788	71.6841	39.2061	36.096	40.7287	43.6227	49.6446	47.3301	Tmem66	store-operated_calcium_entry-associated_regulatory_factor
ENSMUSG00000038633	32.1268	32.6803	30.7208	78.9334	71.0079	70.5701	30.0107	29.5634	36.1785	63.4395	61.7403	73.4333	Degs1	degenerative_spermatocyte_homolog_1_(Drosophila)
ENSMUSG00000035203	87.6021	84.7826	81.8944	76.4852	70.8647	78.8805	77.9415	74.3662	82.2263	72.6781	72.3865	75.6859	Epn1	epsin_1
ENSMUSG00000030811	90.8975	91.2198	87.1941	67.9894	70.7937	68.8513	73.5453	68.314	73.2081	59.242	56.2328	56.3645	Fbxl19	F-box_and_leucine-rich_repeat_protein_19
ENSMUSG00000059119	90.6207	96.4483	98.2553	68.9317	70.7645	68.7766	81.5304	81.2023	76.564	65.5848	71.6416	65.6507	Nap1l4	nucleosome_assembly_protein_1-like_4
ENSMUSG00000078485	4.99514	4.68398	4.61472	83.5481	70.6176	105.454	7.11899	7.63885	10.3532	31.3557	24.9104	33.6206	Plekhn1	pleckstrin_homology_domain_containing_family_N_member_1
ENSMUSG00000024588	15.8732	14.6199	15.024	69.6247	70.5624	69.0728	13.2159	14.222	12.176	22.8968	23.3302	23.9565	Fech	ferrochelatase
ENSMUSG00000022964	12.8739	12.4996	14.398	64.7539	70.491	74.9684	10.5969	9.91552	12.0321	22.6111	24.8839	25.3439	Tmem50b	transmembrane_protein_50B
ENSMUSG00000084277	57.3666	64.9898	36.032	61.3652	70.4175	77.4706	25.3349	22.2942	37.8201	57.7012	29.1351	60.7292	Gm11702	predicted_gene_11702
ENSMUSG00000042699	78.1769	101.014	110.041	69.6374	70.3875	69.9148	78.943	75.7597	79.8838	70.9666	75.1314	73.176	Dhx9	DEAH_(Asp-Glu-Ala-His)_box_polypeptide_9
ENSMUSG00000031865	83.7381	66.5544	73.9654	73.0734	70.3689	71.0576	64.8493	63.1682	65.1383	59.8212	62.5933	60.1012	Dctn1	dynactin_1
ENSMUSG00000027002	48.2673	52.4573	52.3063	65.4076	70.3296	64.7048	49.6514	48.9849	53.3713	62.7855	70.4072	64.6633	Nckap1	NCK-associated_protein_1
ENSMUSG00000004268	116.505	123.699	130.013	70.7765	70.2582	70.0059	101.063	107.754	111.553	69.5895	81.7356	75.2247	Emg1	EMG1_nucleolar_protein_homolog_(S._cerevisiae)
ENSMUSG00000028029	68.9899	60.2866	65.4361	66.7602	70.2405	69.1927	55.2392	63.8058	58.0213	61.3121	65.2374	66.3134	Aimp1	aminoacyl_tRNA_synthetase_complex-interacting_multifunctional_protein_1
ENSMUSG00000027808	40.4482	53.9496	59.9302	68.9173	70.0943	70.5959	51.5672	53.0064	52.1573	66.797	75.9892	70.1179	Serp1	stress-associated_endoplasmic_reticulum_protein_1
ENSMUSG00000004096	64.685	72.4265	77.1817	62.9749	70.0176	69.1134	60.0774	64.8636	64.5098	62.3728	62.9139	59.1507	Cwc15	CWC15_homolog_(S._cerevisiae)
ENSMUSG00000028115	12.1252	11.2298	11.2691	68.0636	70.0098	72.4524	10.1629	10.373	11.5598	29.765	30.1021	29.7574	Bnipl	BCL2/adenovirus_E1B_19kD_interacting_protein_like
ENSMUSG00000031785	50.6667	53.5114	41.0415	63.8164	69.9911	71.2711	38.1979	34.4325	39.1024	54.6191	47.6432	56.3604	Gpr56	G_protein-coupled_receptor_56
ENSMUSG00000024486	8.8407	8.28296	6.47868	67.1458	69.8825	61.8313	16.0057	12.6825	18.5181	58.2764	66.1223	57.088	Hbegf	heparin-binding_EGF-like_growth_factor
ENSMUSG00000027133	64.7224	77.092	79.8372	62.9976	69.7933	72.6166	49.1158	52.7811	51.1799	58.8952	74.1827	65.2476	Nop10	NOP10_ribonucleoprotein
ENSMUSG00000028044	102.001	139.796	126.937	65.369	69.7059	69.9643	87.6488	87.1104	88.7536	52.831	54.7039	65.2461	Cks1b	CDC28_protein_kinase_1b
ENSMUSG00000071650	88.691	79.6624	71.5364	71.3296	69.6865	73.0738	70.9621	64.701	72.3008	58.1095	48.4368	66.8209	Ganab	alpha_glucosidase_2_alpha_neutral_subunit
ENSMUSG00000004264	139.913	129.242	137.314	73.7095	69.5549	76.2312	88.8854	96.8221	103.882	78.6859	79.3728	80.6683	Phb2	prohibitin_2
ENSMUSG00000027170	64.2025	69.5857	73.835	62.3673	69.2949	66.1354	51.1996	59.6072	59.8394	55.1957	65.0633	56.5134	Eif3m	eukaryotic_translation_initiation_factor_3_subunit_M
ENSMUSG00000029068	32.6106	47.4409	38.1624	75.0612	69.1862	73.22	34.6176	36.6769	48.9297	65.397	53.3423	67.9092	Ccnl2	cyclin_L2
ENSMUSG00000020680	110.591	129.477	133.276	65.5439	69.1464	70.3224	102.821	101.966	116.161	71.4773	66.253	67.361	Taf15	TAF15_RNA_polymerase_II_TATA_box_binding_protein_(TBP)-associated_factor
ENSMUSG00000096942	43.5794	70.1359	58.037	27.7354	69.1104	78.7004	28.5728	35.5713	16.278	96.8823	144.754	72.9187	Rps19-ps6	ribosomal_protein_S19_pseudogene_6
ENSMUSG00000022710	46.873	45.3804	46.9108	69.6245	69.0473	70.4672	43.7153	41.0479	44.2035	49.2926	51.2969	56.5616	Usp7	ubiquitin_specific_peptidase_7
ENSMUSG00000031948	119.38	110.021	120.54	65.7044	68.9738	70.1645	88.9379	89.6855	94.0727	70.7588	78.5216	72.238	Kars	lysyl-tRNA_synthetase
ENSMUSG00000062981	114.377	124.91	136.37	70.3883	68.9425	68.9356	80.056	89.7253	92.9196	71.6609	68.6516	72.8924	Mrpl42	mitochondrial_ribosomal_protein_L42
ENSMUSG00000021910	128.138	115.633	116.994	73.3846	68.9271	72.4606	93.8605	91.9144	97.8268	78.1207	71.7518	81.5564	Nisch	nischarin
ENSMUSG00000034789	25.2331	33.9095	25.111	74.7323	68.9091	77.575	29.0996	27.0078	24.1369	50.3702	45.2174	52.9098	Rab24	RAB24_member_RAS_oncogene_family
ENSMUSG00000030224	76.6101	84.3879	87.5965	67.4124	68.8851	63.7385	75.2616	79.9886	71.5526	67.9317	78.5066	71.677	Strap	serine/threonine_kinase_receptor_associated_protein
ENSMUSG00000021377	87.3083	138.583	155.711	67.0715	68.8141	69.9916	126.028	135.537	118.086	64.8697	65.1392	63.0571	Dek	DEK_oncogene_(DNA_binding)
ENSMUSG00000059956	4.81735	3.0272	2.73371	66.9111	68.7252	68.0891	6.42168	7.61315	11.5603	63.2576	69.2478	76.8488	Serpinb12	serine_(or_cysteine)_peptidase_inhibitor_clade_B_(ovalbumin)_member_12
ENSMUSG00000063931	23.6839	20.3426	18.7543	73.9376	68.6632	63.7272	17.8077	18.6849	13.7102	29.2802	39.2007	33.5972	Pepd	peptidase_D
ENSMUSG00000028618	30.3036	33.433	32.2728	69.9736	68.5434	72.0235	38.5658	35.8437	35.2058	50.6528	47.2197	51.7348	Tmem59	transmembrane_protein_59
ENSMUSG00000000631	22.9769	18.9604	20.821	70.0051	68.52	70.478	22.7495	21.0422	19.904	28.6499	28.5967	29.982	Myo18a	myosin_XVIIIA
ENSMUSG00000031983	38.0049	32.8715	35.3341	66.9343	68.4389	65.1404	31.5597	29.0473	28.5507	40.1558	49.2797	44.4212	2310022B05Rik	RIKEN_cDNA_2310022B05_gene
ENSMUSG00000063410	52.8233	54.0624	53.8106	63.7247	68.3973	61.775	58.8374	55.3625	55.7769	62.5822	59.7526	58.9691	Stk24	serine/threonine_kinase_24
ENSMUSG00000008140	74.688	74.7517	67.2454	63.7898	68.3919	67.6243	75.2997	71.9129	74.1563	62.8889	60.1929	65.8968	Emc10	ER_membrane_protein_complex_subunit_10
ENSMUSG00000005846	52.0311	54.8161	66.8867	64.5315	68.2481	71.3021	50.1064	54.9371	47.2706	67.5763	72.934	67.7324	Rsl1d1	ribosomal_L1_domain_containing_1
ENSMUSG00000020923	90.6805	95.1981	95.2383	64.1155	68.2325	73.4246	74.3705	75.7515	74.2597	59.7957	53.2605	59.9451	Ubtf	upstream_binding_transcription_factor_RNA_polymerase_I
ENSMUSG00000020219	101.785	110.948	109.306	67.5661	68.2216	65.9849	93.6324	97.0795	88.2162	67.7586	76.1629	69.6648	Timm13	translocase_of_inner_mitochondrial_membrane_13
ENSMUSG00000015937	93.1725	90.1603	96.2626	67.9957	68.0814	67.3894	82.6632	80.6444	81.5322	52.3163	54.6898	57.3842	H2afy	H2A_histone_family_member_Y
ENSMUSG00000058587	36.3231	32.9957	37.3948	64.1148	68.0478	61.4488	58.2177	57.4457	56.0682	64.6797	66.3999	63.4555	Tmod3	tropomodulin_3
ENSMUSG00000017485	41.2303	51.0464	57.1934	67.1234	68.0233	63.0914	53.6	51.6391	52.7911	74.6876	78.8774	77.9342	Top2b	topoisomerase_(DNA)_II_beta
ENSMUSG00000020869	115.433	110.217	117.914	68.9211	67.9068	67.0035	107.216	99.617	109.576	90.1181	96.08	93.6649	Lrrc59	leucine_rich_repeat_containing_59
ENSMUSG00000020720	49.9877	44.1387	54.7877	68.4042	67.899	67.1298	44.9728	43.9226	46.2422	56.1201	60.3532	63.439	Psmd12	proteasome_(prosome_macropain)_26S_subunit_non-ATPase_12
ENSMUSG00000028070	100.452	96.0441	96.6563	68.8433	67.8622	62.5437	58.6946	63.9814	57.4644	42.3225	45.3953	40.4294	Apoa1bp	apolipoprotein_A-I_binding_protein
ENSMUSG00000056501	17.955	18.7533	16.6993	73.8009	67.8424	63.0118	22.4008	22.3968	29.4966	59.1095	72.4533	67.0366	Cebpb	CCAAT/enhancer_binding_protein_(C/EBP)_beta
ENSMUSG00000059734	86.9117	84.6455	84.6176	70.2978	67.8114	67.129	67.7427	72.2518	69.2947	57.7763	56.953	59.3265	Ndufs8	NADH_dehydrogenase_(ubiquinone)_Fe-S_protein_8
ENSMUSG00000022477	116.539	106.353	99.4782	70.6702	67.8035	66.4447	105.165	101.488	102.558	86.0449	78.539	87.5974	Aco2	aconitase_2_mitochondrial
ENSMUSG00000001440	106.043	108.912	107.762	67.8025	67.7711	63.087	79.628	76.913	80.4704	68.8067	74.95	68.0341	Kpnb1	karyopherin_(importin)_beta_1
ENSMUSG00000075296	35.0657	37.1527	35.8799	78.4242	67.6057	64.1446	21.5814	20.4495	23.7678	82.8812	83.4956	79.7192	Aldh3b2	aldehyde_dehydrogenase_3_family_member_B2
ENSMUSG00000022462	59.1168	69.8398	47.5582	69.1382	67.5675	50.0981	78.3172	75.9967	93.5823	77.4261	81.2981	89.4772	Slc38a2	solute_carrier_family_38_member_2
ENSMUSG00000020893	67.4169	84.0698	56.4418	77.4938	67.5094	64.0113	95.5181	88.1591	130.022	81.557	68.6407	85.7489	Per1	period_circadian_clock_1
ENSMUSG00000030403	71.442	76.326	71.2865	65.131	67.4968	62.7685	73.8991	67.2055	69.805	76.176	74.3529	73.8952	Vasp	vasodilator-stimulated_phosphoprotein
ENSMUSG00000050628	64.5175	81.6411	74.6705	59.8967	67.4397	61.183	71.7655	65.3667	84.4267	48.3229	57.7379	51.6876	Ubald2	UBA-like_domain_containing_2
ENSMUSG00000078652	64.7995	70.6354	80.0891	63.709	67.4287	69.5169	62.9651	64.0366	63.0076	71.5474	72.057	71.0701	Psme3	proteaseome_(prosome_macropain)_activator_subunit_3_(PA28_gamma_Ki)
ENSMUSG00000026421	85.484	88.3122	76.2195	73.0186	67.4067	73.4061	101.346	97.8322	96.0036	71.2123	96.9744	71.145	Csrp1	cysteine_and_glycine-rich_protein_1
ENSMUSG00000003380	65.5444	63.4627	56.6537	66.9407	67.3014	70.1691	83.2281	75.5965	81.1102	59.2671	55.6115	57.3504	Rabac1	Rab_acceptor_1_(prenylated)
ENSMUSG00000014956	24.7549	44.7627	47.3192	63.1667	67.295	66.6388	44.615	47.1213	44.5059	59.6452	62.4201	60.1193	Ppp1cb	protein_phosphatase_1_catalytic_subunit_beta_isoform
ENSMUSG00000035585	130.459	146.117	151.732	66.9922	67.28	73.2788	149.579	145.64	135.868	72.3929	75.6966	74.5253	Tsen34	tRNA_splicing_endonuclease_34_homolog_(S._cerevisiae)
ENSMUSG00000025066	94.0189	99.015	113.85	64.6727	67.2498	59.1729	65.9318	66.952	77.8919	55.3319	64.2787	54.9752	Sfr1	SWI5_dependent_recombination_repair_1
ENSMUSG00000020458	68.1335	66.5485	65.2311	66.8675	67.2426	68.4781	83.4686	76.5127	83.1086	61.3432	58.8802	61.1712	Rtn4	reticulon_4
ENSMUSG00000005981	82.4077	73.2148	70.3784	64.8775	67.1856	66.2585	59.6117	57.3462	63.9541	70.4692	68.0106	71.586	Trap1	TNF_receptor-associated_protein_1
ENSMUSG00000024769	32.5218	30.6473	27.4896	69.107	67.0021	71.8324	30.3987	27.8046	32.7636	51.3556	48.0386	51.3998	Cdc42bpg	CDC42_binding_protein_kinase_gamma_(DMPK-like)
ENSMUSG00000022314	77.931	88.3305	91.3695	63.8621	66.9771	59.8411	80.7823	77.6286	79.4808	61.5982	62.1307	60.6014	Rad21	RAD21_homolog_(S._pombe)
ENSMUSG00000028010	70.5566	88.7646	93.1744	60.7979	66.9759	71.8903	58.4224	55.9224	63.9784	60.786	61.4018	60.5096	Gar1	GAR1_ribonucleoprotein_homolog_(yeast)
ENSMUSG00000032637	88.7602	100.309	95.5754	68.2871	66.9581	71.8631	86.3428	79.6421	107.725	78.2704	71.535	76.379	Atxn2l	ataxin_2-like
ENSMUSG00000009630	57.0357	73.1691	69.8841	68.1573	66.9483	65.1967	57.4188	57.7613	52.2142	41.5929	45.308	42.7897	Ppp2cb	protein_phosphatase_2_(formerly_2A)_catalytic_subunit_beta_isoform
ENSMUSG00000069808	9.86128	5.31513	6.22854	66.6426	66.8653	70.5672	9.35488	9.31582	11.4743	28.0507	28.1725	33.6519	Fam57a	family_with_sequence_similarity_57_member_A
ENSMUSG00000030103	30.6017	33.5355	22.9491	68.2026	66.8652	57.5966	45.141	36.7954	57.737	77.8219	105.263	66.8439	Bhlhe40	basic_helix-loop-helix_family_member_e40
ENSMUSG00000005447	85.9341	104.205	103.267	62.029	66.8635	62.9214	74.0712	68.9371	71.5428	47.3898	52.339	50.547	Pafah1b3	platelet-activating_factor_acetylhydrolase_isoform_1b_subunit_3
ENSMUSG00000038612	41.7095	60.7775	48.5696	69.3695	66.8382	62.1855	58.8251	51.4295	57.5644	54.9959	54.3274	54.6353	Mcl1	myeloid_cell_leukemia_sequence_1
ENSMUSG00000091811	23.2086	21.1918	22.6346	64.6977	66.7905	76.4689	19.5454	17.9481	19.7612	27.8851	25.4203	24.9877	Prr24	InaF_motif_containing_1
ENSMUSG00000038502	100.367	113.707	110.927	67.9774	66.7506	75.1069	79.0665	74.7437	74.5087	55.7257	56.6627	58.4913	Ptov1	prostate_tumor_over_expressed_gene_1
ENSMUSG00000038393	126.016	132.71	136.8	47.3403	66.583	89.3477	206.898	211.631	189.35	146.984	157.758	100.919	Txnip	thioredoxin_interacting_protein
ENSMUSG00000045665	26.6361	24.9002	25.5734	73.4115	66.5506	69.8604	31.2227	30.7488	23.7546	42.2099	39.9768	43.6797	Mfsd5	major_facilitator_superfamily_domain_containing_5
ENSMUSG00000036026	57.6816	53.5097	46.1965	69.3635	66.4757	75.8797	67.7244	65.9515	78.2575	63.8866	55.2667	60.8269	Tmem63b	transmembrane_protein_63b
ENSMUSG00000029059	27.1956	30.1861	28.731	74.3833	66.4716	70.4952	17.4577	18.6721	18.9988	33.2177	39.813	36.9227	Fam213b	family_with_sequence_similarity_213_member_B
ENSMUSG00000027828	52.5631	71.0772	66.9198	63.8399	66.4327	66.2273	64.8413	66.3485	68.0637	67.5258	68.0723	69.1952	Ssr3	signal_sequence_receptor_gamma
ENSMUSG00000020840	59.2669	45.9531	52.937	62.3844	66.4159	64.0088	45.6233	46.6799	48.3126	42.5573	44.6953	40.3679	Blmh	bleomycin_hydrolase
ENSMUSG00000036402	14.2876	14.2756	16.3636	69.7489	66.3968	67.7039	16.1893	16.3698	19.8334	43.5518	48.8408	48.4549	Gng12	guanine_nucleotide_binding_protein_(G_protein)_gamma_12
ENSMUSG00000028955	43.8151	48.7097	52.5818	62.3669	66.3731	71.2368	49.6622	52.5232	52.9303	54.8189	56.4339	57.1757	Vamp3	vesicle-associated_membrane_protein_3
ENSMUSG00000032212	30.3139	31.6101	33.3853	68.6427	66.3122	66.6742	32.3526	31.5029	35.2246	67.7999	65.5715	69.2799	Sltm	SAFB-like_transcription_modulator
ENSMUSG00000026895	91.8444	90.3411	96.7635	69.3757	66.3078	69.2793	85.2736	90.7065	85.2434	72.1131	74.9553	72.2898	Ndufa8	NADH_dehydrogenase_(ubiquinone)_1_alpha_subcomplex_8
ENSMUSG00000030062	75.8136	61.9319	57.9416	63.7632	66.2249	65.4991	67.078	64.992	62.2865	65.0099	60.9304	70.4363	Rpn1	ribophorin_I
ENSMUSG00000041168	106.487	89.0237	91.563	71.7915	66.167	69.01	75.1285	72.0049	82.7252	67.7463	63.8637	75.626	Lonp1	lon_peptidase_1_mitochondrial
ENSMUSG00000033955	27.5769	19.5553	24.1581	68.0432	65.8602	67.7166	32.5399	34.6112	31.3568	69.126	65.1757	71.0557	Tnks1bp1	tankyrase_1_binding_protein_1
ENSMUSG00000004099	78.7184	74.9032	84.7779	66.955	65.8453	67.4973	71.3323	66.4621	70.3913	37.2319	37.4582	37.4303	Dnmt1	DNA_methyltransferase_(cytosine-5)_1
ENSMUSG00000018362	51.0472	62.5987	61.1387	65.3035	65.8092	61.535	52.6893	53.462	47.0081	47.1585	37.0665	49.9321	Kpna2	karyopherin_(importin)_alpha_2
ENSMUSG00000035027	99.5015	87.4258	91.5622	69.3753	65.801	70.7924	79.7733	77.2143	74.4821	64.0391	66.7857	69.5447	Map2k2	mitogen-activated_protein_kinase_kinase_2
ENSMUSG00000003309	43.9052	36.4838	35.0326	64.9086	65.7812	69.2739	29.9002	34.6096	31.1559	43.0899	48.5809	46.103	Ap1m2	adaptor_protein_complex_AP-1_mu_2_subunit
ENSMUSG00000040280	26.5719	3.23051	3.75257	97.7688	65.6445	39.2896	66.9198	71.245	82.8602	278.235	354.384	329.232	Ndufa4l2	NADH_dehydrogenase_(ubiquinone)_1_alpha_subcomplex_4-like_2
ENSMUSG00000021595	50.2762	46.9416	50.02	65.769	65.5776	62.771	40.3404	41.6981	40.3215	60.6364	65.6589	66.7976	Nsun2	NOL1/NOP2/Sun_domain_family_member_2
ENSMUSG00000042520	77.2611	72.6647	84.0376	63.3276	65.5277	62.812	64.7303	65.2713	65.6149	66.0497	67.784	62.6566	Ubap2l	ubiquitin-associated_protein_2-like
ENSMUSG00000030417	71.3635	81.1489	95.7454	68.7645	65.407	76.7379	56.8727	64.0958	69.3395	66.2069	61.8932	69.0975	Pdcd5	programmed_cell_death_5
ENSMUSG00000005354	82.596	87.4389	91.8947	63.298	65.3769	63.2212	68.3879	65.7201	69.82	60.8013	63.0183	59.1071	Txn2	thioredoxin_2
ENSMUSG00000021814	25.4986	25.188	24.8647	65.4698	65.2539	69.4521	35.2275	35.0536	35.4724	66.9017	73.5736	69.1119	Anxa7	annexin_A7
ENSMUSG00000020167	152.488	154.397	159.011	64.8116	65.108	68.2473	133.896	125.35	118.648	68.7282	63.6733	63.7469	Tcf3	transcription_factor_3
ENSMUSG00000006299	66.8156	65.5648	70.1013	65.8286	65.1066	67.8281	49.1371	45.77	53.011	52.2036	57.2202	55.1903	Aamp	angio-associated_migratory_protein
ENSMUSG00000030559	41.7686	36.4392	36.6659	65.9645	65.0373	68.1612	37.326	39.4436	40.3273	58.517	65.3883	56.486	Rab38	RAB38_member_RAS_oncogene_family
ENSMUSG00000024856	45.7177	52.3	48.0366	72.6714	65.0072	65.7845	39.7662	38.4294	41.2936	56.9688	58.5995	59.0787	Cdk2ap2	CDK2-associated_protein_2
ENSMUSG00000025982	48.2833	60.4252	63.6878	66.2168	64.941	62.941	50.4269	50.7578	57.6573	53.4316	57.0966	56.8673	Sf3b1	splicing_factor_3b_subunit_1
ENSMUSG00000048234	28.3265	26.1345	26.6115	61.0671	64.9271	69.9247	27.5493	25.4357	25.1511	33.6521	36.3433	42.7349	Rnf149	ring_finger_protein_149
ENSMUSG00000056629	101.663	92.1091	93.8908	61.3993	64.8598	60.6962	74.7563	72.9891	92.2559	59.3463	50.8241	58.3448	Fkbp2	FK506_binding_protein_2
ENSMUSG00000004937	80.5017	80.7111	81.3524	65.6138	64.8006	69.1644	71.8929	67.7693	61.0364	67.0854	60.4214	63.6627	Sgta	small_glutamine-rich_tetratricopeptide_repeat_(TPR)-containing_alpha
ENSMUSG00000033128	48.5039	47.8628	48.498	65.5758	64.6507	66.3907	42.388	40.9647	45.2635	44.4173	46.161	47.7497	Gga1	golgi_associated_gamma_adaptin_ear_containing_ARF_binding_protein_1
ENSMUSG00000024646	46.7561	59.8968	57.5513	63.2401	64.5227	68.8705	67.3627	65.6622	62.8738	81.1236	78.2088	74.3839	Cyb5a	cytochrome_b5_type_A_(microsomal)
ENSMUSG00000026615	57.9281	47.3964	57.0682	61.4967	64.517	57.3844	40.8684	42.6723	46.5517	60.1857	65.831	65.473	Eprs	glutamyl-prolyl-tRNA_synthetase
ENSMUSG00000022536	53.1767	54.1266	57.0131	64.0026	64.4793	64.2825	48.5586	46.5948	48.4092	46.1222	49.6684	46.9193	Glyr1	glyoxylate_reductase_1_homolog_(Arabidopsis)
ENSMUSG00000019054	65.0438	71.0867	77.2324	61.3074	64.4766	69.0343	66.0067	59.7063	58.4955	47.8455	50.0242	48.9452	Fis1	fission_1_(mitochondrial_outer_membrane)_homolog_(yeast)
ENSMUSG00000062397	42.5758	44.7488	50.1641	62.7776	64.4648	64.5612	42.0345	44.1808	46.473	68.9664	73.0274	74.782	Zfp706	zinc_finger_protein_706
ENSMUSG00000078713	50.179	72.5746	66.0019	61.0623	64.4549	60.044	38.9761	47.2468	53.0404	55.3823	63.6302	58.5104	Tomm5	translocase_of_outer_mitochondrial_membrane_5_homolog_(yeast)
ENSMUSG00000016382	28.0681	37.9666	36.3874	62.0061	64.4294	59.2342	19.5585	19.1743	15.8111	22.074	25.5349	26.7171	Pls3	plastin_3_(T-isoform)
ENSMUSG00000024346	57.9064	60.4708	69.4422	71.9834	64.3781	68.6048	46.4436	52.9577	45.5613	41.8807	45.9948	44.5062	Pfdn1	prefoldin_1
ENSMUSG00000021123	1.74135	1.61365	1.6956	72.91	64.2782	70.3726	1.71734	1.67632	2.47133	7.48727	7.63932	9.76366	Rdh12	retinol_dehydrogenase_12
ENSMUSG00000004665	62.5926	51.3644	52.7396	62.9065	64.2706	69.5752	50.8896	50.6994	48.4751	61.2961	63.8048	52.7633	Cnn2	calponin_2
ENSMUSG00000002741	61.3243	61.1734	65.3157	60.5639	64.2678	64.074	65.669	63.8611	63.105	52.2219	56.1111	53.5952	Ykt6	YKT6_homolog_(S._Cerevisiae)
ENSMUSG00000026021	68.6322	87.4404	96.5084	59.4099	64.2642	63.8554	75.0124	80.7376	78.2032	59.1908	64.6561	58.9244	Sumo1	SMT3_suppressor_of_mif_two_3_homolog_1_(yeast)
ENSMUSG00000015749	113.405	131.309	141.012	64.4177	64.0371	62.9888	107.734	101.416	112.414	71.6244	74.0295	74.8572	Anp32e	acidic_(leucine-rich)_nuclear_phosphoprotein_32_family_member_E
ENSMUSG00000050808	0.797085	1.62933	1.15687	67.3372	63.8704	52.7761	1.47491	1.78713	2.19309	10.1354	7.42839	13.1301	Muc15	mucin_15
ENSMUSG00000078453	51.72	65.8501	68.5322	59.1519	63.8208	62.7102	50.1668	50.783	44.5209	40.093	43.6263	37.9936	Abracl	ABRA_C-terminal_like
ENSMUSG00000024835	76.2447	76.6265	73.636	67.254	63.7719	65.0932	64.4346	63.6362	61.2609	56.1096	57.171	56.0275	Coro1b	coronin_actin_binding_protein_1B
ENSMUSG00000025162	69.6517	72.2437	65.7328	63.3964	63.7661	61.2678	51.6324	51.2284	50.7462	44.6238	50.3405	43.3006	Csnk1d	casein_kinase_1_delta
ENSMUSG00000032002	42.1867	59.9153	58.1745	62.6207	63.7188	63.3102	50.4478	52.3506	51.6439	61.6013	62.9205	65.9936	Dcun1d5	DCN1_defective_in_cullin_neddylation_1_domain_containing_5_(S._cerevisiae)
ENSMUSG00000073616	48.8978	56.9915	55.7118	62.9896	63.6184	61.9689	41.555	49.7122	48.027	46.4612	44.5212	46.7191	Myeov2	myeloma_overexpressed_2
ENSMUSG00000029090	35.3225	41.1414	35.9311	67.1344	63.6042	66.0781	19.7716	17.7959	17.4944	9.86547	11.4843	11.1224	Gpr125	G_protein-coupled_receptor_125
ENSMUSG00000035545	33.0938	46.595	33.0043	69.5383	63.601	76.0652	27.5248	32.8708	39.9415	44.2585	32.2593	45.0412	Leng8	leukocyte_receptor_cluster_(LRC)_member_8
ENSMUSG00000040459	51.0756	65.0807	67.1083	62.5449	63.4968	70.9218	46.8583	56.0187	54.3346	51.6343	45.0996	53.4011	Arglu1	arginine_and_glutamate_rich_1
ENSMUSG00000004880	42.7301	38.1562	38.4507	54.7509	63.4341	61.2266	31.0028	34.3896	36.6788	36.2474	37.7709	42.3663	Lbr	lamin_B_receptor
ENSMUSG00000025260	75.6598	84.321	82.3684	59.8238	63.3926	62.9337	57.5109	71.2428	57.1208	47.4268	54.1215	48.9063	Hsd17b10	hydroxysteroid_(17-beta)_dehydrogenase_10
ENSMUSG00000024975	37.2511	33.5898	35.3998	66.0213	63.2971	60.8872	24.9749	29.1341	23.3962	25.6572	23.2792	23.7755	Pdcd4	programmed_cell_death_4
ENSMUSG00000028822	50.7024	49.0798	47.1147	59.7852	63.2371	59.2936	44.2505	44.4559	45.3612	42.486	44.397	44.9047	Tmem50a	transmembrane_protein_50A
ENSMUSG00000042682	25.7431	38.5258	33.5156	56.1415	63.2091	58.5284	44.2494	42.628	51.9865	56.3154	63.8423	53.5393	Selk	selenoprotein_K
ENSMUSG00000007029	121.355	110.492	120.488	65.6864	63.1163	63.072	107.483	106.203	112.247	71.3991	69.2647	79.697	Vars	valyl-tRNA_synthetase
ENSMUSG00000026819	23.3552	25.4971	15.9593	62.9482	63.1136	50.6372	25.4207	21.8175	38.0694	45.6703	63.4511	42.196	Slc25a25	solute_carrier_family_25_(mitochondrial_carrier_phosphate_carrier)_member_25
ENSMUSG00000020361	79.9145	81.9491	93.7209	58.9211	63.0866	58.1686	71.295	71.6442	68.5374	72.6275	79.24	74.9702	Hspa4	heat_shock_protein_4
ENSMUSG00000056708	27.6694	30.626	20.9399	70.7023	63.0192	50.4762	28.342	25.5733	35.3908	26.5062	28.9832	26.9546	Ier5	immediate_early_response_5
ENSMUSG00000028530	49.3868	48.3161	51.0802	64.2367	62.9288	58.6132	44.3052	42.0807	43.7597	56.6224	59.8051	53.1117	Jak1	Janus_kinase_1
ENSMUSG00000048455	1.87724	0.408871	0.556891	70.8159	62.8682	82.4302	1.84113	2.5494	5.85338	9.77215	13.201	12.4638	Sprr1b	small_proline-rich_protein_1B
ENSMUSG00000015217	67.145	83.2175	88.4948	57.8684	62.8049	71.5114	69.5441	72.4603	63.7906	33.5114	31.555	35.6215	Hmgb3	high_mobility_group_box_3
ENSMUSG00000006442	135.23	127.294	122.259	66.0416	62.7505	64.4447	103.808	95.2778	112.842	138.084	135.955	138.715	Srm	spermidine_synthase
ENSMUSG00000020386	17.1017	26.8694	27.2917	66.566	62.6669	61.9791	23.7187	23.745	27.1606	33.5282	42.7911	47.7826	Sar1b	SAR1_gene_homolog_B_(S._cerevisiae)
ENSMUSG00000029135	77.1678	79.0944	57.6803	68.8998	62.6292	55.3075	111.915	98.6258	124.343	163.018	161.947	179.427	Fosl2	fos-like_antigen_2
ENSMUSG00000062762	55.0097	53.7615	51.8816	61.0387	62.6237	63.9778	44.6336	45.3029	41.3121	43.0417	45.4075	42.9128	Ei24	etoposide_induced_2.4_mRNA
ENSMUSG00000020935	101.555	93.0704	100.751	60.4943	62.6017	61.7596	69.1853	63.8697	64.9831	47.652	45.3694	44.8896	Dcakd	dephospho-CoA_kinase_domain_containing
ENSMUSG00000026965	58.1241	53.1539	57.7485	62.8747	62.5952	63.5281	46.2235	45.9825	47.2668	40.0628	37.8535	39.0235	Anapc2	anaphase_promoting_complex_subunit_2
ENSMUSG00000041939	22.2123	19.229	23.4721	65.5716	62.5929	66.0575	20.5493	18.8269	19.7755	37.5015	37.079	39.507	Mvk	mevalonate_kinase
ENSMUSG00000085396	28.5397	45.8257	31.9057	60.3125	62.5492	74.522	32.4084	35.8265	37.4833	43.795	28.542	45.2103	Firre	functional_intergenic_repeating_RNA_element
ENSMUSG00000013858	52.9993	60.4302	51.8303	64.3714	62.5221	71.2903	53.1857	49.6354	54.7918	55.0511	45.4859	57.9452	Tmem259	transmembrane_protein_259
ENSMUSG00000027298	25.0771	29.1392	25.8814	63.1332	62.5	64.5417	19.2948	17.7761	18.9116	31.1649	25.2302	31.9212	Tyro3	TYRO3_protein_tyrosine_kinase_3
ENSMUSG00000042507	33.3238	31.637	23.689	61.1916	62.4665	54.0626	28.7702	24.0928	31.1794	42.6503	43.1477	52.9295	Elmsan1	ELM2_and_Myb/SANT-like_domain_containing_1
ENSMUSG00000053716	41.5445	36.9005	36.1158	65.5465	62.4553	57.1878	70.5317	62.7316	88.2828	80.6387	113.361	92.4374	Dusp7	dual_specificity_phosphatase_7
ENSMUSG00000025812	27.8786	26.7816	27.8519	59.2143	62.3832	56.822	23.5645	23.4423	22.2701	26.8496	29.4477	27.4357	Pard3	par-3_family_cell_polarity_regulator
ENSMUSG00000048277	32.8122	33.4447	26.3041	67.9501	62.3334	68.1988	31.1826	30.465	33.8461	48.8389	46.2564	53.6901	Syngr2	synaptogyrin_2
ENSMUSG00000038235	32.4007	37.5819	30.5683	59.0152	62.327	65.433	37.8206	35.0262	43.8052	53.6396	51.0349	57.5956	F11r	F11_receptor
ENSMUSG00000032097	46.5772	61.8102	68.1985	54.4464	62.2873	59.3314	47.1451	50.9092	51.5479	48.486	52.2096	46.6021	Ddx6	DEAD_(Asp-Glu-Ala-Asp)_box_polypeptide_6
ENSMUSG00000042207	16.0904	16.2703	15.2205	59.6625	62.2824	59.1821	9.71131	8.41017	10.5938	26.4189	27.1043	32.8107	Kdm5b	lysine_(K)-specific_demethylase_5B
ENSMUSG00000030678	217.172	218.549	225.29	63.7496	62.2092	67.9974	184.84	176.754	177.926	95.254	88.8827	86.6888	Maz	MYC-associated_zinc_finger_protein_(purine-binding_transcription_factor)
ENSMUSG00000024007	80.724	92.1186	96.8428	66.2956	62.209	63.9277	62.1712	68.5174	63.5953	49.2023	49.0664	48.3218	Ppil1	peptidylprolyl_isomerase_(cyclophilin)-like_1
ENSMUSG00000020390	28.3717	43.0319	35.4776	62.8683	62.1721	61.9453	30.4846	34.6012	36.354	38.5291	41.6228	41.1492	Ube2b	ubiquitin-conjugating_enzyme_E2B
ENSMUSG00000006024	56.7543	59.9917	62.8744	64.9465	62.1588	64.4269	51.7102	50.3662	48.9695	54.6821	57.9773	60.0751	Napa	N-ethylmaleimide_sensitive_fusion_protein_attachment_protein_alpha
ENSMUSG00000021822	14.5102	11.2152	9.52844	66.2199	62.026	56.5249	19.9751	21.2958	21.1817	62.12	54.5608	61.3959	Plau	plasminogen_activator_urokinase
ENSMUSG00000057738	38.8468	32.2343	31.0648	63.0624	61.938	57.9766	28.675	25.3692	31.0239	39.5107	40.4248	43.5745	Sptan1	spectrin_alpha_non-erythrocytic_1
ENSMUSG00000095567	54.1438	70.4547	66.1428	61.768	61.9226	72.0506	52.2856	54.3348	51.1719	66.2527	61.1121	67.1603	Noc2l	nucleolar_complex_associated_2_homolog_(S._cerevisiae)
ENSMUSG00000023089	98.6182	96.8943	112.727	62.2168	61.9151	66.0583	74.8735	77.8053	86.5956	57.6544	58.2036	59.9201	Ndufa5	NADH_dehydrogenase_(ubiquinone)_1_alpha_subcomplex_5
ENSMUSG00000028797	87.6271	71.8711	80.2159	55.2718	61.9151	61.8841	72.9514	69.5459	69.0564	49.1173	52.2667	52.0423	Tmem234	transmembrane_protein_234
ENSMUSG00000029106	77.6029	66.1682	75.8016	60.4287	61.8598	60.4612	59.73	57.2353	57.9858	52.226	54.0747	49.9214	Add1	adducin_1_(alpha)
ENSMUSG00000020089	66.6473	64.737	72.2463	61.6713	61.8548	59.5864	55.6827	58.0636	58.3473	73.1323	80.8837	79.4713	Ppa1	pyrophosphatase_(inorganic)_1
ENSMUSG00000026032	42.0212	60.0352	52.9999	63.4218	61.8336	66.9813	42.5415	46.0606	47.7602	50.3972	49.52	54.5841	Ndufb3	NADH_dehydrogenase_(ubiquinone)_1_beta_subcomplex_3
ENSMUSG00000061360	86.1296	102.542	114.867	63.9424	61.8036	69.7904	98.8185	93.8611	93.4692	70.1128	64.7317	65.9469	Phf5a	PHD_finger_protein_5A
ENSMUSG00000019210	37.1445	34.1406	37.5375	64.2764	61.7549	59.6751	43.4946	40.6895	42.4937	67.1125	62.773	61.6785	Atp6v1e1	ATPase_H+_transporting_lysosomal_V1_subunit_E1
ENSMUSG00000023353	95.3678	94.3123	89.2322	58.0146	61.6934	62.155	90.7206	85.3443	78.3492	56.2588	50.6627	52.9976	Agap3	ArfGAP_with_GTPase_domain_ankyrin_repeat_and_PH_domain_3
ENSMUSG00000032096	58.7351	58.6133	62.9876	55.9653	61.5226	59.5149	53.1551	55.6589	54.2329	57.9345	61.889	56.711	Arcn1	archain_1
ENSMUSG00000030842	60.994	71.6776	76.9226	60.3694	61.5148	66.2024	63.0844	64.7621	59.4698	49.0777	50.3277	49.375	Lamtor1	late_endosomal/lysosomal_adaptor_MAPK_and_MTOR_activator_1
ENSMUSG00000003200	54.5731	62.6819	63.6441	62.5467	61.5089	61.4103	62.3174	58.0803	60.2963	43.1976	46.2478	43.4559	Sh3gl1	SH3-domain_GRB2-like_1
ENSMUSG00000033730	23.2019	20.0075	15.2289	62.7241	61.3871	78.5352	28.3664	26.435	23.0366	45.6992	56.4975	48.5391	Egr3	early_growth_response_3
ENSMUSG00000032026	48.5224	46.3926	49.1814	60.2541	61.3792	60.9716	43.1668	45.5711	43.392	52.3194	58.1639	52.6701	Rexo2	REX2_RNA_exonuclease_2_homolog_(S._cerevisiae)
ENSMUSG00000001441	42.8437	40.4974	34.9575	60.6321	61.3028	62.5923	27.2971	31.0495	34.7591	45.9374	44.8817	46.0337	Npepps	aminopeptidase_puromycin_sensitive
ENSMUSG00000003873	64.1749	95.2002	88.2239	59.108	61.1684	64.2724	58.3373	57.4633	64.2959	53.8189	54.1567	53.5712	Bax	BCL2-associated_X_protein
ENSMUSG00000021939	64.2593	58.7208	56.3278	69.4361	61.0452	65.6755	54.8705	53.1019	55.489	50.1314	49.8716	50.6162	Ctsb	cathepsin_B
ENSMUSG00000004945	72.2811	68.5226	71.559	63.5938	61.0426	65.8198	61.1871	64.0334	52.7442	41.9445	51.7642	38.38	Tmem242	transmembrane_protein_242
ENSMUSG00000032187	90.6937	72.6577	79.1165	58.3524	61.0171	59.219	72.1877	68.3458	72.3992	52.974	55.9689	53.6982	Smarca4	SWI/SNF_related_matrix_associated_actin_dependent_regulator_of_chromatin_subfamily_a_member_4
ENSMUSG00000036181	55.5402	47.1748	39.5178	60.7794	60.922	44.9299	135.692	120.354	133.974	61.5105	83.6973	57.1615	Hist1h1c	histone_cluster_1_H1c
ENSMUSG00000014606	62.6171	59.1531	65.4773	59.4221	60.8842	57.3448	49.25	50.947	48.7241	40.8539	40.8518	41.813	Slc25a11	solute_carrier_family_25_(mitochondrial_carrier_oxoglutarate_carrier)_member_11
ENSMUSG00000028648	68.4941	44.0048	91.927	69.4581	60.878	47.5333	77.1224	79.8733	42.4195	74.1877	61.5528	68.3106	Ndufs5	NADH_dehydrogenase_(ubiquinone)_Fe-S_protein_5
ENSMUSG00000030499	76.2398	75.6395	71.5051	60.7528	60.8331	60.7751	91.4745	85.1377	78.4492	79.3147	73.9529	75.0655	Kctd15	potassium_channel_tetramerisation_domain_containing_15
ENSMUSG00000030216	64.8556	78.7234	73.4316	62.8479	60.6154	56.6515	59.1377	63.3056	60.4487	59.0452	60.3731	55.1873	Wbp11	WW_domain_binding_protein_11
ENSMUSG00000027710	15.7853	12.4524	13.3147	62.0106	60.5233	59.765	20.9701	19.2403	21.5546	50.9329	53.2675	58.4089	Acad9	acyl-Coenzyme_A_dehydrogenase_family_member_9
ENSMUSG00000030704	16.5716	23.5495	26.222	54.9711	60.4857	59.5326	22.9181	28.5579	27.5046	48.2804	51.1297	52.4529	Rab6a	RAB6A_member_RAS_oncogene_family
ENSMUSG00000026878	31.7866	35.863	40.1498	59.164	60.4724	58.648	34.2722	36.8933	35.6843	49.4927	51.096	48.738	Rab14	RAB14_member_RAS_oncogene_family
ENSMUSG00000028998	55.3966	65.0432	73.7857	58.7411	60.422	62.3916	52.0901	57.6052	60.6004	53.3091	45.0404	52.3279	Tomm7	translocase_of_outer_mitochondrial_membrane_7_homolog_(yeast)
ENSMUSG00000070544	48.0644	59.1795	63.4895	59.0088	60.3949	54.8291	47.756	50.1535	55.8206	49.8744	55.1694	54.0832	Top1	topoisomerase_(DNA)_I
ENSMUSG00000001017	88.8534	93.4177	96.8511	59.8633	60.3435	61.2622	81.7771	84.6154	84.0856	60.0527	63.1475	60.123	Chtop	chromatin_target_of_PRMT1
ENSMUSG00000020152	47.5664	43.0751	48.5031	59.3058	60.3236	58.887	58.3308	61.0284	54.3001	72.6325	74.8144	75.2237	Actr2	ARP2_actin-related_protein_2
ENSMUSG00000080893	36.3227	55.3578	50.3603	53.5419	60.3121	65.119	32.614	28.5525	24.9228	67.6978	72.9604	74.4911	Gm15920	predicted_gene_15920
ENSMUSG00000074656	51.4649	52.3509	58.6429	55.2488	60.0659	52.2595	41.4537	48.6074	48.122	54.7342	61.3735	56.7448	Eif2s2	eukaryotic_translation_initiation_factor_2_subunit_2_(beta)
ENSMUSG00000024725	16.0868	16.2964	15.7298	60.3597	60.0277	57.3023	14.0239	17.2426	18.8153	38.3527	41.9366	35.5859	Ostf1	osteoclast_stimulating_factor_1
ENSMUSG00000024513	88.5477	88.6469	92.1251	66.9772	60.0074	62.3895	103.261	101.467	105.702	81.131	87.442	93.7514	Mbd2	methyl-CpG_binding_domain_protein_2
ENSMUSG00000022400	63.9652	66.2699	69.8695	58.2956	59.9204	60.6737	51.0365	54.1247	54.9342	49.4532	50.8615	48.0137	Rbx1	ring-box_1
ENSMUSG00000024067	48.6049	56.0714	60.0104	58.4824	59.8989	54.522	41.2215	47.2435	49.6325	48.568	50.708	54.2993	Dpy30	dpy-30_homolog_(C._elegans)
ENSMUSG00000016256	67.3603	62.5295	57.1825	57.4033	59.8163	63.8598	47.2842	45.9582	46.341	23.0477	26.7571	28.5118	Ctsz	cathepsin_Z
ENSMUSG00000024099	60.9738	62.5646	68.6294	56.6589	59.757	54.1424	47.6757	55.1698	52.2885	50.1682	59.9816	54.7183	Ndufv2	NADH_dehydrogenase_(ubiquinone)_flavoprotein_2
ENSMUSG00000060904	45.0806	54.3411	53.9345	51.5461	59.7306	55.1216	44.9061	51.7318	50.2516	44.3641	47.7303	42.2815	Arl1	ADP-ribosylation_factor-like_1
ENSMUSG00000028793	32.76	27.8402	23.2253	60.7394	59.6989	57.3369	33.7828	29.2244	39.9742	50.8948	59.7307	60.1027	Rnf19b	ring_finger_protein_19B
ENSMUSG00000028809	53.1123	62.2734	67.3615	63.0811	59.6921	57.723	57.0229	56.2041	63.477	58.5083	58.0723	55.6468	Srrm1	serine/arginine_repetitive_matrix_1
ENSMUSG00000066568	58.9979	60.7887	63.0382	57.8502	59.6711	59.0311	64.4738	63.5018	63.2104	55.8568	56.4858	54.2987	Lsm14a	LSM14_homolog_A_(SCD6_S._cerevisiae)
ENSMUSG00000022403	64.9858	65.3815	70.1944	57.7588	59.6678	58.3039	41.0715	45.1727	48.4938	46.6769	53.2413	48.7342	St13	suppression_of_tumorigenicity_13
ENSMUSG00000029859	52.8767	52.998	46.4138	61.2956	59.6477	64.8244	33.0171	29.3326	36.2205	41.5127	35.7976	47.0733	Epha1	Eph_receptor_A1
ENSMUSG00000071019	0.594648	0.523049	0.738789	62.3077	59.6297	63.0251	0.909053	0.758925	2.20519	13.261	14.6625	15.7051	Sdr16c6	short_chain_dehydrogenase/reductase_family_16C_member_6
ENSMUSG00000024960	73.2425	59.5369	60.5461	59.6822	59.5988	58.2463	83.4882	79.1219	82.0293	88.558	84.3202	83.835	Plcb3	phospholipase_C_beta_3
ENSMUSG00000026087	56.4628	60.2906	60.1118	63.5681	59.5693	65.6822	57.3601	59.1043	57.2759	59.0828	65.5372	65.3929	Mrpl30	mitochondrial_ribosomal_protein_L30
ENSMUSG00000000568	51.5556	77.9106	88.2411	56.778	59.5429	60.1805	70.134	71.3728	70.2124	61.4916	58.0259	61.4163	Hnrnpd	heterogeneous_nuclear_ribonucleoprotein_D
ENSMUSG00000018398	18.2459	18.6172	20.1822	61.2884	59.4706	61.8586	11.1797	11.7561	12.8474	16.523	16.8772	18.1201	2020-09-08	septin_8
ENSMUSG00000021248	60.2838	54.532	55.4589	55.525	59.4605	60.1447	58.8622	55.9996	56.9347	50.5259	49.6755	54.3478	Tmed10	transmembrane_emp24-like_trafficking_protein_10_(yeast)
ENSMUSG00000003435	75.5036	69.5582	75.8554	62.1291	59.43	63.9242	63.4838	60.5649	68.4986	59.5029	56.8057	59.9848	Supt5	suppressor_of_Ty_5
ENSMUSG00000028392	8.15893	7.42648	6.01749	58.1531	59.4178	57.2888	4.7485	4.02263	4.77395	21.0938	24.5245	25.8219	Bspry	B-box_and_SPRY_domain_containing
ENSMUSG00000019853	10.7305	10.7297	11.3432	56.3979	59.3232	74.8319	7.23872	6.77356	8.29524	23.4835	24.1271	23.8919	Hebp2	heme_binding_protein_2
ENSMUSG00000031701	59.4573	59.7713	66.3234	60.9182	59.2846	55.4303	55.9911	56.5048	55.0038	50.8233	58.065	53.4594	Dnaja2	DnaJ_(Hsp40)_homolog_subfamily_A_member_2
ENSMUSG00000020485	63.0876	59.1343	63.5128	55.2472	59.2274	65.1088	52.4302	55.3781	46.436	41.8403	43.6397	40.6897	Supt4a	suppressor_of_Ty_4A
ENSMUSG00000017421	48.9439	60.7359	71.3966	56.4486	59.2126	64.1878	46.3816	51.99	55.0556	49.9054	52.1755	49.0599	Zfp207	zinc_finger_protein_207
ENSMUSG00000041164	45.8039	39.7163	46.3218	59.5806	59.2079	62.9589	45.2766	40.1285	45.0353	49.2887	50.1623	56.7333	Zmiz2	zinc_finger_MIZ-type_containing_2
ENSMUSG00000025337	36.1963	40.6098	37.792	57.6035	59.1657	53.3786	31.7735	30.6274	36.756	45.5463	44.2876	44.6312	Sbds	Shwachman-Bodian-Diamond_syndrome_homolog_(human)
ENSMUSG00000024587	52.5033	47.0524	55.2114	59.2935	59.129	58.0625	54.2359	51.7922	56.0543	76.0362	77.7118	78.2054	Nars	asparaginyl-tRNA_synthetase
ENSMUSG00000034341	31.2877	34.5189	30.3711	57.8605	59.0188	61.0381	33.3765	30.0903	36.5193	42.2277	43.1344	42.5099	Wbp2	WW_domain_binding_protein_2
ENSMUSG00000063358	36.2958	41.2025	44.9178	61.3407	58.9937	59.3927	43.4152	43.0638	41.6007	56.7327	61.3223	54.4287	Mapk1	mitogen-activated_protein_kinase_1
ENSMUSG00000014867	76.8898	64.352	63.0487	59.6559	58.9395	55.7132	63.7541	59.5922	57.4792	61.7332	67.3202	64.2311	Surf4	surfeit_gene_4
ENSMUSG00000029394	136.86	141.057	149.902	62.3668	58.8969	65.04	111.696	101.234	113.611	56.9508	57.1914	67.8503	Cdk2ap1	CDK2_(cyclin-dependent_kinase_2)-associated_protein_1
ENSMUSG00000092586	3.56603	0.261389	0.421946	76.0299	58.8916	77.8447	10.3661	11.4805	23.2999	21.6362	24.4874	26.3475	Ly6g6c	lymphocyte_antigen_6_complex_locus_G6C
ENSMUSG00000018379	44.5717	76.0104	83.1297	57.7398	58.8911	61.0169	62.062	71.0235	66.2582	59.4014	60.1699	56.7243	Srsf1	serine/arginine-rich_splicing_factor_1
ENSMUSG00000049960	93.1684	90.9269	96.5474	57.2646	58.8894	56.6658	72.7209	81.6747	84.39	58.678	60.1986	65.0053	Mrps16	mitochondrial_ribosomal_protein_S16
ENSMUSG00000020388	20.5459	17.0696	18.5549	52.9091	58.8731	59.2564	12.7309	11.8907	12.0411	24.9043	32.8469	29.8029	Pdlim4	PDZ_and_LIM_domain_4
ENSMUSG00000020741	42.0049	44.5759	43.8079	59.8306	58.8587	59.0841	39.2997	38.3116	36.887	60.1825	57.6076	61.2999	Cluh	clustered_mitochondria_(cluA/CLU1)_homolog
ENSMUSG00000013822	86.0826	89.8682	96.2739	63.0448	58.8317	59.0668	67.8009	72.1447	62.5313	42.7874	48.0222	44.3073	Elof1	elongation_factor_1_homolog_(ELF1_S._cerevisiae)
ENSMUSG00000050296	1.01565	0.92194	0.744119	59.2947	58.83	52.9375	0.691368	0.746825	1.47903	2.52069	3.53724	4.72592	Abca12	ATP-binding_cassette_sub-family_A_(ABC1)_member_12
ENSMUSG00000050108	1.26401	1.05005	0.429991	60.3251	58.8285	58.8116	0.629469	0.465068	1.94023	2.26546	2.69699	2.73018	Bpifc	BPI_fold_containing_family_C
ENSMUSG00000025785	39.2614	43.1033	46.9323	63.5235	58.7856	60.9171	36.7113	36.7466	36.2885	59.2036	52.9174	56.2455	Exosc7	exosome_component_7
ENSMUSG00000025381	87.7027	97.3351	99.2328	52.9349	58.7643	59.4383	55.942	64.0716	65.7987	37.0174	37.0001	40.1978	Cnpy2	canopy_2_homolog_(zebrafish)
ENSMUSG00000051234	60.7953	83.4104	88.0518	60.2676	58.7237	56.689	64.6253	68.9943	62.713	46.1429	55.3123	50.3548	Rnf7	ring_finger_protein_7
ENSMUSG00000042462	140.011	143.583	149.139	52.6441	58.7226	59.7866	80.9875	82.7965	102.85	52.0374	58.3332	59.4167	Dctpp1	dCTP_pyrophosphatase_1
ENSMUSG00000026914	42.6111	51.6727	54.3608	54.0053	58.5832	51.611	48.8307	50.6035	52.4361	52.5884	57.9023	55.4124	Psmd14	proteasome_(prosome_macropain)_26S_subunit_non-ATPase_14
ENSMUSG00000021973	39.7543	31.8765	34.7705	56.6262	58.5791	57.6135	32.059	29.2668	26.2855	37.787	37.4216	35.4613	Micu2	mitochondrial_calcium_uptake_2
ENSMUSG00000021771	68.9806	75.4121	76.7927	59.2574	58.4773	58.5085	70.2626	67.8221	72.0593	77.3878	81.4281	75.1108	Vdac2	voltage-dependent_anion_channel_2
ENSMUSG00000018932	41.0197	35.4074	33.9337	53.1362	58.4472	56.3444	53.1055	51.3592	56.4794	72.3629	81.3772	90.8806	Map2k3	mitogen-activated_protein_kinase_kinase_3
ENSMUSG00000027247	24.1271	24.1689	29.2609	58.4855	58.4393	60.5235	25.0964	22.0692	24.1806	35.0466	37.2631	37.005	Arhgap1	Rho_GTPase_activating_protein_1
ENSMUSG00000018765	53.4152	62.5018	56.5333	57.0689	58.3518	57.5927	55.3739	50.7514	57.3535	50.0044	49.3633	49.7507	Fxr2	fragile_X_mental_retardation_autosomal_homolog_2
ENSMUSG00000022568	60.092	57.6131	51.2917	57.6905	58.3248	62.9044	47.0101	43.8747	50.911	46.3107	39.606	54.7157	Scrib	scribbled_homolog_(Drosophila)
ENSMUSG00000052456	46.4792	52.3363	52.8091	58.9965	58.2668	58.6303	51.5215	50.1407	53.5711	52.9776	54.1447	56.048	Asna1	arsA_arsenite_transporter_ATP-binding_homolog_1_(bacterial)
ENSMUSG00000081824	8.68592	82.6362	4.93074	39.662	58.1838	87.0736	2.36635	6.67697	64.4216	17.5363	46.8607	29.7958	BC002163	cDNA_sequence_BC002163
ENSMUSG00000039952	83.7683	74.4021	70.0577	59.05	58.1626	54.1218	87.7204	76.3499	75.2351	56.5956	52.4574	57.7915	Dag1	dystroglycan_1
ENSMUSG00000015837	39.9663	41.3605	39.0081	62.5705	58.0948	61.7509	33.2493	29.3355	36.1571	40.5365	47.2271	45.9205	Sqstm1	sequestosome_1
ENSMUSG00000030602	78.2437	66.7427	67.5275	57.3383	58.051	56.9993	60.8507	53.8733	59.1792	50.2002	51.5704	53.9567	Pak4	p21_protein_(Cdc42/Rac)-activated_kinase_4
ENSMUSG00000002249	33.1168	38.7914	36.834	61.1009	58.0205	69.8478	29.119	28.3132	32.6374	35.6193	31.2486	37.3942	Tead3	TEA_domain_family_member_3
ENSMUSG00000022111	42.2294	52.8716	48.1173	59.6313	58.0023	60.5515	38.8316	46.4067	43.1386	45.7861	49.1053	50.2213	Uchl3	ubiquitin_carboxyl-terminal_esterase_L3_(ubiquitin_thiolesterase)
ENSMUSG00000047547	22.5032	18.3667	20.3979	60.8094	57.972	57.3081	37.2638	36.3741	38.2459	40.4416	45.2455	42.4879	Cltb	clathrin_light_polypeptide_(Lcb)
ENSMUSG00000024425	56.0877	57.4563	55.7037	60.6512	57.8877	55.3295	58.4839	57.2144	60.8803	61.8856	61.7452	62.3108	Ndfip1	Nedd4_family_interacting_protein_1
ENSMUSG00000028670	49.2285	48.688	54.4835	54.2512	57.8814	57.8231	56.5159	49.3166	52.7615	42.4936	42.8605	42.176	Lypla2	lysophospholipase_2
ENSMUSG00000059058	119.764	116.271	110.325	57.9036	57.8074	71.9903	104.316	108.015	103.236	32.5644	2.37908	48.4808	Tma7-ps	translational_machinery_associated_7_homolog_(S._cerevisiae)_pseudogene
ENSMUSG00000031065	93.5304	80.5633	85.7597	60.0415	57.7856	60.2242	81.7436	80.4794	76.8967	63.1121	58.9871	60.5247	Cdk16	cyclin-dependent_kinase_16
ENSMUSG00000030662	115.485	106.439	111.756	57.7195	57.7215	57.466	91.7912	89.5492	88.3781	64.8435	70.5104	68.51	Ipo5	importin_5
ENSMUSG00000034659	36.8854	30.6658	30.6567	56.0745	57.715	60.0268	45.6674	45.681	44.4487	27.6171	24.619	27.8162	Tmem109	transmembrane_protein_109
ENSMUSG00000025823	136.288	108.812	99.8207	57.3178	57.6983	58.0557	80.5168	91.2769	95.8301	68.3004	61.1286	69.4196	Pdia4	protein_disulfide_isomerase_associated_4
ENSMUSG00000026728	60.7673	34.9722	53.5848	65.0029	57.6942	77.7955	12.4642	5.14403	5.50357	21.9928	17.1587	6.03523	Vim	vimentin
ENSMUSG00000020612	66.6164	72.2109	73.8914	55.5009	57.592	52.944	67.1323	70.0508	68.8318	51.8892	52.7793	47.0284	Prkar1a	protein_kinase_cAMP_dependent_regulatory_type_I_alpha
ENSMUSG00000036825	17.3573	14.8223	16.0725	54.4502	57.5686	51.5257	13.3125	12.1735	15.1405	35.3117	38.0796	38.2258	Ssx2ip	synovial_sarcoma_X_breakpoint_2_interacting_protein
ENSMUSG00000026457	50.6561	47.4794	43.3917	55.4683	57.5556	55.7566	49.0915	43.0835	47.2083	46.7995	47.7174	47.0975	Adipor1	adiponectin_receptor_1
ENSMUSG00000020432	11.4997	12.9015	11.8149	56.2262	57.5291	55.2812	5.76248	6.40204	6.71294	18.1251	18.7674	20.8238	Tcn2	transcobalamin_2
ENSMUSG00000018446	92.5628	96.3201	94.7483	58.7579	57.5129	57.6589	76.4569	81.5918	75.3573	61.748	68.1872	64.2476	C1qbp	complement_component_1_q_subcomponent_binding_protein
ENSMUSG00000024213	112.409	91.6921	96.0408	56.5443	57.4726	57.4297	82.0864	83.0959	79.8124	55.5679	57.9166	57.1367	Nudt3	nudix_(nucleotide_diphosphate_linked_moiety_X)-type_motif_3
ENSMUSG00000005625	66.2413	61.0057	71.2739	59.2522	57.4119	61.5752	62.9491	63.9284	64.6681	60.1676	62.3424	60.1888	Psmd4	proteasome_(prosome_macropain)_26S_subunit_non-ATPase_4
ENSMUSG00000035227	49.9963	50.3954	45.8363	51.2487	57.3564	54.3412	39.5604	40.6066	45.3416	37.5965	40.1753	42.6602	Spcs2	signal_peptidase_complex_subunit_2_homolog_(S._cerevisiae)
ENSMUSG00000026879	45.7881	29.1138	37.141	51.3191	57.2508	57.038	29.2619	31.7422	25.961	13.2594	10.8417	12.732	Gsn	gelsolin
ENSMUSG00000028603	29.2707	33.3052	35.0368	53.8058	57.2382	53.4396	30.2789	36.067	32.7434	30.9256	36.317	31.377	Scp2	sterol_carrier_protein_2_liver
ENSMUSG00000003363	27.2656	25.9995	23.8122	60.1726	57.2184	60.3537	24.9932	23.6799	25.217	33.3056	28.7692	31.6798	Pld3	phospholipase_D_family_member_3
ENSMUSG00000001105	46.5061	41.1911	41.4346	53.9058	57.1649	60.7026	27.3376	38.5986	37.2159	32.7776	33.3486	32.8853	Ift20	intraflagellar_transport_20
ENSMUSG00000031351	7.35697	8.36537	6.93256	59.8735	57.1391	54.5223	8.68983	10.3239	9.74704	44.1206	46.0544	46.4036	Zfp185	zinc_finger_protein_185
ENSMUSG00000029048	37.6876	39.6546	40.8613	54.3491	57.0768	65.8621	37.2838	40.6468	37.9414	48.0213	52.433	51.0731	Rer1	RER1_retention_in_endoplasmic_reticulum_1_homolog_(S._cerevisiae)
ENSMUSG00000030603	79.3201	82.9729	92.2894	57.0728	57.0258	56.4577	70.4501	72.624	72.4363	57.0348	65.3162	61.8211	Psmc4	proteasome_(prosome_macropain)_26S_subunit_ATPase_4
ENSMUSG00000037664	152.761	101.246	115.01	64.5034	57.0174	58.9868	45.4289	45.2652	45.5379	24.6897	30.4315	26.7813	Cdkn1c	cyclin-dependent_kinase_inhibitor_1C_(P57)
ENSMUSG00000054091	41.4923	58.51	54.5522	59.0089	57.0083	53.3589	39.2731	38.7112	50.2255	53.6055	64.4904	49.4749	1810037I17Rik	RIKEN_cDNA_1810037I17_gene
ENSMUSG00000029767	77.1474	79.263	75.4249	56.5109	56.9996	60.3391	68.3612	64.8272	68.4204	56.5311	52.8398	57.4792	Calu	calumenin
ENSMUSG00000001127	31.4987	35.0811	31.4318	63.1237	56.9471	65.2741	28.3008	28.636	33.2599	39.4666	35.9599	47.1623	Araf	v-raf_murine_sarcoma_3611_viral_oncogene_homolog
ENSMUSG00000025198	16.1591	17.7089	18.8935	52.8744	56.8667	52.4184	13.194	12.3414	14.4794	31.2875	31.4901	32.532	Erlin1	ER_lipid_raft_associated_1
ENSMUSG00000057411	45.3005	49.6101	42.0499	64.8362	56.8481	71.8142	41.0706	38.9505	39.3185	48.5703	39.7554	45.6719	Fam173a	family_with_sequence_similarity_173_member_A
ENSMUSG00000031176	14.2292	19.0865	22.9911	59.0245	56.7829	56.8911	23.6808	27.4256	24.1993	45.2788	49.6516	42.3653	Dynlt3	dynein_light_chain_Tctex-type_3
ENSMUSG00000021468	19.9653	17.9795	18.6523	56.0552	56.7358	56.8398	19.1331	18.2839	20.1348	22.1431	20.7295	23.7271	Sptlc1	serine_palmitoyltransferase_long_chain_base_subunit_1
ENSMUSG00000007880	63.3205	67.791	56.2299	58.1033	56.6831	52.3558	44.2574	38.851	48.4895	38.8613	37.1915	43.7112	Arid1a	AT_rich_interactive_domain_1A_(SWI-like)
ENSMUSG00000028654	28.969	27.6882	26.2753	51.4726	56.6514	56.9069	25.6467	24.786	23.3065	24.63	27.68	23.0767	Mycl	v-myc_myelocytomatosis_viral_oncogene_homolog_lung_carcinoma_derived_(avian)
ENSMUSG00000026074	64.9295	56.9784	58.2682	53.5456	56.6217	53.3014	58.2272	53.1349	58.2618	39.4671	39.5917	40.3456	Map4k4	mitogen-activated_protein_kinase_kinase_kinase_kinase_4
ENSMUSG00000028394	49.3854	47.1884	55.2259	52.2213	56.5071	53.8875	41.6907	42.0596	37.2319	30.6788	34.5588	33.2356	Pole3	polymerase_(DNA_directed)_epsilon_3_(p17_subunit)
ENSMUSG00000030084	28.0358	31.0616	25.3948	55.4004	56.4968	58.3937	23.9347	20.4407	22.8119	18.3105	16.4493	18.4645	Plxna1	plexin_A1
ENSMUSG00000020914	90.5315	97.3442	99.2524	53.1104	56.4798	46.3407	97.5247	92.992	95.5915	53.544	46.3437	58.0605	Top2a	topoisomerase_(DNA)_II_alpha
ENSMUSG00000060739	62.8605	58.3703	54.0258	48.9058	56.475	57.4346	48.9448	55.6557	46.2007	40.3591	51.5659	40.2	Nsa2	NSA2_ribosome_biogenesis_homolog_(S._cerevisiae)
ENSMUSG00000028291	29.2787	58.259	54.3346	60.3298	56.4484	57.9681	64.4151	57.429	48.3343	53.0668	60.9557	48.7238	Akirin2	akirin_2
ENSMUSG00000023904	52.1171	46.1623	51.2217	54.2436	56.4464	51.542	53.337	60.4579	58.2743	39.1564	39.9405	39.3254	Hcfc1r1	host_cell_factor_C1_regulator_1_(XPO1-dependent)
ENSMUSG00000019854	37.6132	39.0911	34.6586	52.3047	56.4203	51.9991	24.5562	24.4809	26.4935	28.5714	28.0621	31.7986	Reps1	RalBP1_associated_Eps_domain_containing_protein
ENSMUSG00000039367	44.3273	44.9823	46.505	56.1893	56.3473	58.7671	39.6672	39.6476	40.4577	45.2963	47.199	46.8947	Sec24c	Sec24_related_gene_family_member_C_(S._cerevisiae)
ENSMUSG00000022858	55.083	74.816	90.5637	57.3394	56.341	58.0613	62.3557	64.8159	66.2092	60.7492	71.5565	62.5741	Tra2b	transformer_2_beta_homolog_(Drosophila)
ENSMUSG00000053436	42.3771	40.7659	40.5121	56.6659	56.2848	55.5765	36.7102	36.8521	37.6612	33.1398	34.0679	35.8507	Mapk14	mitogen-activated_protein_kinase_14
ENSMUSG00000037606	19.1495	15.3304	15.2827	55.6321	55.9846	57.9254	22.8491	23.3264	21.8648	45.413	42.1511	42.4267	Osbpl5	oxysterol_binding_protein-like_5
ENSMUSG00000026434	38.4376	63.1644	70.0769	50.2222	55.9516	48.6334	57.9254	56.7717	52.1625	48.7504	49.4068	54.1004	Nucks1	nuclear_casein_kinase_and_cyclin-dependent_kinase_substrate_1
ENSMUSG00000031479	39.3418	34.8971	37.891	52.5791	55.9293	55.8564	30.8478	29.6655	31.3968	39.6522	41.5951	45.4537	Vps36	vacuolar_protein_sorting_36_(yeast)
ENSMUSG00000001016	83.972	82.9902	86.6651	53.9073	55.9268	58.7186	65.0617	72.5098	68.8486	57.6771	55.3089	55.634	Ilf2	interleukin_enhancer_binding_factor_2
ENSMUSG00000026766	55.2124	59.3121	57.3489	54.6233	55.8889	50.7342	53.169	56.5816	58.0858	49.5766	53.1874	48.1511	Mmadhc	methylmalonic_aciduria_(cobalamin_deficiency)_cblD_type_with_homocystinuria
ENSMUSG00000014313	44.9076	60.6016	66.0208	52.1991	55.8651	58.1798	38.5789	46.7662	52.628	46.2998	49.1034	49.6885	Cox6c	cytochrome_c_oxidase_subunit_VIc
ENSMUSG00000057933	1.7188	0.578059	1.92458	55.274	55.8484	47.7182	1.64399	1.36012	1.60689	8.92089	14.6345	14.6256	Gsta2	glutathione_S-transferase_alpha_2_(Yc2)
ENSMUSG00000002844	58.2895	68.9928	64.2971	49.9613	55.7397	52.3877	44.0214	42.309	39.0343	36.5483	35.4608	33.96	Adprh	ADP-ribosylarginine_hydrolase
ENSMUSG00000028066	77.4989	92.944	95.9028	47.3075	55.6902	60.3823	81.9025	78.251	73.9865	41.8114	44.6357	45.641	Pmf1	polyamine-modulated_factor_1
ENSMUSG00000020733	27.8737	30.5883	25.5408	58.2104	55.6554	57.8471	23.3219	23.3998	31.7847	38.6422	35.7748	37.7221	Slc9a3r1	solute_carrier_family_9_(sodium/hydrogen_exchanger)_member_3_regulator_1
ENSMUSG00000039782	4.79583	5.63868	4.37264	51.2124	55.6167	49.7087	5.43278	5.21444	9.06998	24.9733	25.8602	34.5345	Cpeb2	cytoplasmic_polyadenylation_element_binding_protein_2
ENSMUSG00000069255	14.9255	16.4244	16.7819	57.2236	55.5771	61.0164	15.8782	16.3414	16.0952	23.3538	22.8653	21.6554	Dusp22	dual_specificity_phosphatase_22
ENSMUSG00000064127	20.4399	23.7564	25.4751	54.2657	55.5661	50.3379	19.7365	17.7533	17.8488	22.5387	25.2811	26.2149	Med14	mediator_complex_subunit_14
ENSMUSG00000045193	52.2712	76.7121	77.3183	55.5585	55.503	66.2951	63.1285	58.8817	58.8406	43.1104	35.7432	44.9507	Cirbp	cold_inducible_RNA_binding_protein
ENSMUSG00000034075	25.8503	24.2675	24.8627	53.4705	55.454	53.1849	22.5495	21.3813	23.0622	33.4768	34.9523	35.3128	Zdhhc5	zinc_finger_DHHC_domain_containing_5
ENSMUSG00000029755	4.82154	4.94783	5.20582	56.004	55.4512	62.2452	2.28942	2.46696	3.96245	11.1561	19.6696	14.2208	Dlx5	distal-less_homeobox_5
ENSMUSG00000024258	100.706	98.8989	106.202	54.678	55.3985	53.3021	63.2933	66.1794	74.3841	45.0728	59.2032	47.3062	Polr2d	polymerase_(RNA)_II_(DNA_directed)_polypeptide_D
ENSMUSG00000037935	81.7537	83.8858	92.1342	53.1887	55.3689	54.4293	71.0725	72.0285	68.9652	47.2605	45.6594	45.2158	Smarce1	SWI/SNF_related_matrix_associated_actin_dependent_regulator_of_chromatin_subfamily_e_member_1
ENSMUSG00000024571	42.3772	41.4078	45.9397	55.1463	55.3157	65.0731	38.9374	40.0504	37.6781	50.8854	47.4935	51.5382	Gm16286	predicted_gene_16286
ENSMUSG00000037503	85.4492	83.976	92.3794	52.9285	55.2356	54.0072	72.5943	66.9403	66.9607	44.5684	46.4308	43.9585	Fam168b	family_with_sequence_similarity_168_member_B
ENSMUSG00000058833	66.5234	77.059	76.3206	56.8511	55.2058	59.03	63.7005	61.5923	52.2786	55.3948	53.8254	49.9414	2810428I15Rik	RIKEN_cDNA_2810428I15_gene
ENSMUSG00000019961	99.6213	111.532	131.228	52.2226	54.9961	51.929	104.259	106.057	104.998	57.7913	61.9898	60.4123	Tmpo	thymopoietin
ENSMUSG00000020349	48.2603	49.38	55.9257	53.3597	54.978	51.3645	47.4161	45.8083	46.0814	45.437	49.3983	47.2663	Ppp2ca	protein_phosphatase_2_(formerly_2A)_catalytic_subunit_alpha_isoform
ENSMUSG00000028759	51.2245	53.9984	54.2922	50.6125	54.9597	55.782	51.5754	51.0969	46.5003	39.0175	40.3174	38.6705	Hp1bp3	heterochromatin_protein_1_binding_protein_3
ENSMUSG00000030754	35.636	39.6843	40.331	52.4599	54.9346	50.0029	37.2249	37.5874	40.4286	46.5053	49.2298	50.9627	Copb1	coatomer_protein_complex_subunit_beta_1
ENSMUSG00000033918	28.1187	27.3873	30.5573	52.6704	54.9195	58.4424	27.456	26.9695	29.429	37.4351	36.0248	37.8335	Parl	presenilin_associated_rhomboid-like
ENSMUSG00000082286	57.984	74.1964	59.1575	53.8882	54.776	91.6712	37.1999	42.2383	57.9676	79.144	57.6953	68.1963	Pisd-ps1	phosphatidylserine_decarboxylase_pseudogene_1
ENSMUSG00000028064	27.8844	29.0815	27.9262	58.9001	54.7582	59.201	22.809	20.7987	23.6997	18.3663	16.9035	18.8621	Sema4a	sema_domain_immunoglobulin_domain_(Ig)_transmembrane_domain_(TM)_and_short_cytoplasmic_domain_(semaphorin)_4A
ENSMUSG00000053510	51.6224	45.1854	46.5372	55.2011	54.7194	55.6592	46.7615	43.9452	45.7242	48.5502	49.3945	52.1801	Nrd1	nardilysin_N-arginine_dibasic_convertase_NRD_convertase_1
ENSMUSG00000037149	66.647	70.9633	79.8223	54.6094	54.6349	51.233	62.6294	64.7901	64.8344	54.5384	54.9599	52.5283	Ddx1	DEAD_(Asp-Glu-Ala-Asp)_box_polypeptide_1
ENSMUSG00000015405	4.86767	3.05711	3.26159	54.549	54.631	56.8691	2.44286	2.38117	4.1286	29.0721	35.5554	38.0761	Ace2	angiotensin_I_converting_enzyme_(peptidyl-dipeptidase_A)_2
ENSMUSG00000032263	49.5197	45.6831	43.4218	53.5128	54.5423	49.8224	33.7851	34.4497	36.693	44.426	45.2648	47.607	Bckdhb	branched_chain_ketoacid_dehydrogenase_E1_beta_polypeptide
ENSMUSG00000031691	35.5253	37.1812	33.9091	53.2763	54.5273	55.0823	30.9687	29.9946	31.3527	43.2256	41.573	42.0928	Tnpo2	transportin_2_(importin_3_karyopherin_beta_2b)
ENSMUSG00000004789	48.8449	51.1181	50.3539	51.8281	54.5057	51.2215	47.1674	47.9538	45.6735	48.3573	47.8582	47.574	Dlst	dihydrolipoamide_S-succinyltransferase_(E2_component_of_2-oxo-glutarate_complex)
ENSMUSG00000064120	19.7799	15.3953	14.842	56.3889	54.4826	60.7384	14.4144	14.2808	14.0891	24.2272	25.0915	30.2437	Mocs1	molybdenum_cofactor_synthesis_1
ENSMUSG00000018677	113.098	110.655	119.274	59.2321	54.4129	56.1246	74.7438	74.2757	71.2409	71.7525	76.0505	76.1517	Slc25a39	solute_carrier_family_25_member_39
ENSMUSG00000020782	20.6511	23.4493	20.9867	56.729	54.4127	60.5661	16.0921	14.2836	16.6557	32.4261	36.1198	39.7833	Llgl2	lethal_giant_larvae_homolog_2_(Drosophila)
ENSMUSG00000053110	90.6517	90.1106	95.8007	52.5257	54.3741	50.7049	95.9546	93.5012	82.7538	53.5268	55.2356	51.856	Yap1	yes-associated_protein_1
ENSMUSG00000027406	64.1579	63.3037	65.2499	55.9177	54.2792	55.4191	52.9924	50.2237	51.262	49.7331	49.4587	47.0861	Idh3b	isocitrate_dehydrogenase_3_(NAD+)_beta
ENSMUSG00000033732	68.2786	70.1608	76.2324	52.6818	54.2392	50.8641	56.1706	52.3896	56.1712	63.0346	64.5203	63.1428	Sf3b3	splicing_factor_3b_subunit_3
ENSMUSG00000039960	8.46743	8.67775	8.72993	52.0071	54.2238	55.3817	5.66894	5.5111	5.99949	11.2127	13.3645	14.9924	Rhou	ras_homolog_gene_family_member_U
ENSMUSG00000004455	102.699	99.6103	104.064	54.7156	54.0864	58.9388	75.6332	73.8855	84.074	55.4531	59.0346	55.1822	Ppp1cc	protein_phosphatase_1_catalytic_subunit_gamma_isoform
ENSMUSG00000061111	82.8147	78.0794	79.219	49.5242	54.0813	58.1116	65.8577	65.9487	60.0306	39.6437	43.0514	39.7501	Fam195b	family_with_sequence_similarity_195_member_B
ENSMUSG00000073639	31.9579	46.7	52.0203	50.9878	54.0776	51.0423	45.0106	42.467	46.3726	48.3206	52.3461	46.5052	Rab18	RAB18_member_RAS_oncogene_family
ENSMUSG00000022817	186.429	165.209	154.368	58.4331	54.0444	54.3552	91.2241	83.6485	81.904	74.4705	71.8318	77.0821	Itgb5	integrin_beta_5
ENSMUSG00000054312	42.3795	54.9399	62.1801	55.7726	53.9641	60.0332	42.6789	50.1608	61.6761	46.1622	52.3409	47.0935	Mrps21	mitochondrial_ribosomal_protein_S21
ENSMUSG00000003438	70.5149	65.1185	67.1496	52.8027	53.944	57.0474	45.9449	45.7702	48.7529	40.4508	43.449	48.5042	Timm50	translocase_of_inner_mitochondrial_membrane_50
ENSMUSG00000013787	99.7385	87.5661	94.3825	55.8785	53.9224	55.4672	76.42	78.5541	79.1247	58.6841	54.9524	58.7933	Ehmt2	euchromatic_histone_lysine_N-methyltransferase_2
ENSMUSG00000026202	23.6321	20.3054	18.9735	57.9327	53.8233	58.1022	40.8209	39.6103	40.6271	69.0123	67.0289	74.403	Tuba4a	tubulin_alpha_4A
ENSMUSG00000045948	38.9006	49.8355	50.8539	49.9504	53.8156	54.6536	41.5295	42.5705	36.3615	47.2581	44.308	45.7772	Mrps12	mitochondrial_ribosomal_protein_S12
ENSMUSG00000064373	3.96758	4.44432	5.33197	67.2901	53.8106	52.5227	2.89775	3.10401	4.11437	17.5326	18.5014	15.2029	Sepp1	selenoprotein_P_plasma_1
ENSMUSG00000039128	50.0715	59.0676	65.7635	51.2624	53.8006	54.5241	58.9531	63.0623	59.6334	46.894	48.9793	47.9408	Cdc123	cell_division_cycle_123
ENSMUSG00000021610	53.1361	54.8275	51.4857	54.0743	53.7983	54.7896	48.5177	46.974	49.9115	52.0291	49.8993	51.2304	Clptm1l	CLPTM1-like
ENSMUSG00000004843	24.6466	30.0297	30.3937	50.462	53.7694	47.6745	28.1869	31.0742	30.5763	36.139	40.6372	35.2261	Chmp2b	charged_multivesicular_body_protein_2B
ENSMUSG00000028128	9.65896	10.656	11.2242	61.5848	53.768	47.1083	10.2077	9.39834	16.8166	58.0804	83.0078	93.5407	F3	coagulation_factor_III
ENSMUSG00000035325	45.583	42.8906	48.2308	53.6977	53.7135	55.2748	43.1032	42.1864	43.9215	43.3407	44.4999	45.2637	Sec31a	Sec31_homolog_A_(S._cerevisiae)
ENSMUSG00000035673	24.5033	24.6875	21.1622	56.8109	53.6917	56.0916	28.1501	26.6037	36.1487	51.1603	53.7905	45.6854	Sbno2	strawberry_notch_homolog_2_(Drosophila)
ENSMUSG00000024181	57.0327	53.3864	57.9528	58.0548	53.688	57.5848	44.6959	46.8204	49.3121	44.9632	52.5796	48.8097	Mrpl28	mitochondrial_ribosomal_protein_L28
ENSMUSG00000030753	34.4832	38.7349	44.2381	47.9836	53.6648	50.4005	35.6426	35.6825	33.1192	34.6676	38.4212	38.3364	Prkrir	protein-kinase_interferon-inducible_double_stranded_RNA_dependent_inhibitor_repressor_of_(P58_repressor)
ENSMUSG00000089715	61.6311	50.8744	46.282	51.4229	53.5925	53.4941	42.3574	49.3283	39.2157	26.5961	27.3359	23.2535	Cbx6	chromobox_6
ENSMUSG00000030805	52.4692	48.9613	49.5541	57.5389	53.527	58.913	44.6959	48.1667	42.5671	45.2744	38.306	41.906	Stx4a	syntaxin_4A_(placental)
ENSMUSG00000060073	39.4223	57.5627	63.2008	50.8145	53.522	54.0828	45.1322	51.2933	47.795	50.3795	51.909	54.89	Psma3	proteasome_(prosome_macropain)_subunit_alpha_type_3
ENSMUSG00000032458	47.7303	43.8605	51.5208	51.217	53.4469	47.8611	45.6827	46.1425	42.2148	47.9022	49.5863	46.1756	Copb2	coatomer_protein_complex_subunit_beta_2_(beta_prime)
ENSMUSG00000017721	90.034	77.1735	77.8282	55.4266	53.3892	56.9223	64.304	57.8738	61.1811	44.2013	41.5967	46.5412	Pigt	phosphatidylinositol_glycan_anchor_biosynthesis_class_T
ENSMUSG00000047126	30.751	31.5782	33.1955	55.3558	53.3358	49.6205	29.5947	26.7374	29.1365	42.7051	49.7281	43.3802	Cltc	clathrin_heavy_polypeptide_(Hc)
ENSMUSG00000036241	89.9413	61.0246	63.8042	49.679	53.3119	49.2083	45.4685	53.5228	48.0625	36.748	37.8868	35.3877	Ube2r2	ubiquitin-conjugating_enzyme_E2R_2
ENSMUSG00000030315	55.8068	59.5272	50.7389	52.3335	53.2745	51.3441	62.7759	55.1098	57.9423	49.4572	50.9839	48.5905	Vgll4	vestigial_like_4_(Drosophila)
ENSMUSG00000030513	9.67705	10.0201	10.4415	58.5112	53.2304	48.7414	4.66281	3.82297	4.99818	3.43775	3.40961	3.95525	Pcsk6	proprotein_convertase_subtilisin/kexin_type_6
ENSMUSG00000023495	35.2159	41.5718	42.7719	46.2467	53.1852	58.5563	19.0151	18.2231	20.1221	16.2073	14.4237	17.4367	Pcbp4	poly(rC)_binding_protein_4
ENSMUSG00000029823	28.3038	41.9881	47.482	55.4324	53.1807	54.2804	42.0371	44.8041	46.0409	45.5507	41.9597	48.0255	Luc7l2	LUC7-like_2_(S._cerevisiae)
ENSMUSG00000001403	66.062	69.4727	65.7453	47.8764	53.1786	46.3779	67.9812	64.6652	64.9759	47.2	44.8416	49.8186	Ube2c	ubiquitin-conjugating_enzyme_E2C
ENSMUSG00000060743	89.2626	88.2883	92.8339	54.8606	53.1544	55.8661	71.8659	77.5405	95.299	46.5656	50.4581	46.8385	H3f3a	H3_histone_family_3A
ENSMUSG00000026356	49.6228	53.1044	60.7934	50.8706	53.1006	45.5706	47.8035	51.0319	50.4777	55.4254	62.496	54.6257	Dars	aspartyl-tRNA_synthetase
ENSMUSG00000030246	123.444	143.469	150.894	39.7381	53.0966	61.1828	98.3798	97.6108	91.6629	31.3823	39.1344	34.3681	Ldhb	lactate_dehydrogenase_B
ENSMUSG00000025278	14.0981	14.0742	11.8205	56.251	53.0411	51.2478	9.00686	7.20821	8.33163	21.6099	21.1455	26.9265	Flnb	filamin_beta
ENSMUSG00000027131	54.1374	54.5716	50.4293	57.0734	52.9872	52.5496	41.2252	42.4129	50.9611	43.9374	41.8981	51.8812	Emc4	ER_membrane_protein_complex_subunit_4
ENSMUSG00000038762	67.7178	53.6031	62.601	55.0954	52.9688	53.3714	55.3275	58.1235	54.1182	57.0297	57.6782	55.4986	Abcf1	ATP-binding_cassette_sub-family_F_(GCN20)_member_1
ENSMUSG00000020444	37.4533	41.3261	44.9496	51.4358	52.9601	60.7092	30.6265	31.9793	32.2048	36.4655	36.1975	34.036	Guk1	guanylate_kinase_1
ENSMUSG00000020664	41.2727	51.1664	51.1012	53.7361	52.946	52.9672	43.435	46.8888	45.1234	52.3088	53.4329	52.6976	Dld	dihydrolipoamide_dehydrogenase
ENSMUSG00000053907	31.182	48.0373	45.4552	53.9306	52.9374	61.0752	41.7134	42.257	45.3035	56.5261	43.55	54.1996	Mat2a	methionine_adenosyltransferase_II_alpha
ENSMUSG00000020894	25.9498	35.6182	34.7924	54.3163	52.907	64.254	25.8739	29.6587	33.2644	46.0546	38.5724	44.7978	Vamp2	vesicle-associated_membrane_protein_2
ENSMUSG00000037211	27.0262	33.0982	32.0206	51.1161	52.8459	52.3358	35.2309	27.2819	37.4075	28.9334	36.4154	32.1757	Spry1	sprouty_homolog_1_(Drosophila)
ENSMUSG00000028640	35.9363	35.2122	30.1884	52.214	52.8202	48.2171	56.5134	59.6477	63.1477	65.6768	64.4118	69.8643	Tfap2c	transcription_factor_AP-2_gamma
ENSMUSG00000063171	58.6725	53.0199	70.1091	51.102	52.7616	54.1959	44.0692	43.1663	39.5826	54.833	51.2734	52.8897	Rps4l	ribosomal_protein_S4-like
ENSMUSG00000032437	52.0853	58.5332	46.5903	49.554	52.7577	48.874	47.2874	47.8683	44.9335	44.5826	43.8546	46.0217	Stt3b	STT3_subunit_of_the_oligosaccharyltransferase_complex_homolog_B_(S._cerevisiae)
ENSMUSG00000008384	26.9308	31.4745	11.9749	59.1967	52.7257	34.2775	27.292	26.6476	43.5385	36.868	47.5752	48.5733	Sertad1	SERTA_domain_containing_1
ENSMUSG00000022205	33.2597	48.0863	52.4694	50.7808	52.7235	48.7132	29.9033	35.4431	42.288	37.2599	41.5798	39.4627	Sub1	SUB1_homolog_(S._cerevisiae)
ENSMUSG00000020091	74.0242	65.7267	72.8698	48.5726	52.7232	50.3493	70.6282	67.4251	67.3165	63.0953	62.2544	60.2287	Eif4ebp2	eukaryotic_translation_initiation_factor_4E_binding_protein_2
ENSMUSG00000027954	39.5075	43.8866	27.3903	55.9976	52.6966	44.9374	50.0517	46.4042	55.2801	54.8132	51.8626	58.2093	Efna1	ephrin_A1
ENSMUSG00000018848	51.6971	44.6317	50.354	54.9005	52.6889	50.7631	39.3718	39.7428	39.4849	52.7869	55.1151	55.6325	Rars	arginyl-tRNA_synthetase
ENSMUSG00000017009	87.0854	70.4854	78.6681	47.8027	52.6799	51.2788	78.2472	82.6101	84.1374	73.7916	65.6812	65.9246	Sdc4	syndecan_4
ENSMUSG00000032047	33.777	34.2659	34.3326	52.5981	52.6549	49.2828	35.8793	39.4088	34.091	43.6628	49.503	43.8827	Acat1	acetyl-Coenzyme_A_acetyltransferase_1
ENSMUSG00000020827	37.6226	34.4069	33.8835	55.787	52.6452	56.57	40.5571	39.9333	46.6277	60.1659	51.846	66.2763	Mink1	misshapen-like_kinase_1_(zebrafish)
ENSMUSG00000041354	23.7893	28.6354	27.0701	57.2428	52.6371	62.1706	24.7517	24.9494	26.2661	37.364	30.3859	36.1576	Rgl2	ral_guanine_nucleotide_dissociation_stimulator-like_2
ENSMUSG00000007458	38.1731	41.3178	42.4018	55.7934	52.6044	55.0777	38.4481	38.211	41.0253	40.6599	40.7559	40.3866	M6pr	mannose-6-phosphate_receptor_cation_dependent
ENSMUSG00000038615	43.7826	39.0907	33.557	51.4036	52.5971	51.7074	37.3224	34.3754	36.1363	44.8962	42.6639	42.9981	Nfe2l1	nuclear_factor_erythroid_derived_2-like_1
ENSMUSG00000047731	34.5858	28.5434	27.1228	51.826	52.5933	54.3395	32.8901	31.0771	31.2929	54.501	51.1322	56.123	Wbp1l	WW_domain_binding_protein_1_like
ENSMUSG00000018849	41.3312	49.4199	47.4579	53.1439	52.5129	55.3823	29.383	27.3955	28.4165	28.0405	27.8041	30.5413	Wwc1	WW_C2_and_coiled-coil_domain_containing_1
ENSMUSG00000034832	29.1903	32.1276	27.4681	51.022	52.5093	48.629	29.7208	25.969	25.4794	33.3979	29.5363	34.3098	Tet3	tet_methylcytosine_dioxygenase_3
ENSMUSG00000019659	42.0993	49.5944	48.4439	54.5358	52.5084	56.3703	44.1981	45.1817	39.7066	38.5681	44.1739	43.2301	Ccdc12	coiled-coil_domain_containing_12
ENSMUSG00000003068	56.156	62.1374	57.9973	53.5447	52.4879	53.7083	51.3569	47.5735	51.2305	47.4116	44.6091	50.1946	Stk11	serine/threonine_kinase_11
ENSMUSG00000074884	57.2816	77.5423	77.6853	49.4493	52.4689	49.7807	60.8933	62.3857	65.2847	47.5893	47.7616	41.5888	Serf2	small_EDRK-rich_factor_2
ENSMUSG00000024194	46.2524	62.1753	54.6297	50.9593	52.466	56.5249	53.2839	52.0359	57.5387	56.8645	58.7262	59.5783	Cuta	cutA_divalent_cation_tolerance_homolog_(E._coli)
ENSMUSG00000031536	14.7679	16.6339	14.9281	55.8299	52.4292	54.8842	11.9481	11.3798	12.9887	22.7958	23.3998	23.4475	Polb	polymerase_(DNA_directed)_beta
ENSMUSG00000022757	27.2253	33.2689	33.8086	50.6922	52.4102	46.4645	26.7997	26.8906	27.3848	45.8887	46.4583	46.0307	Tfg	Trk-fused_gene
ENSMUSG00000019960	45.617	49.8985	52.2814	44.8184	52.3243	48.564	84.2339	70.1408	89.9162	57.7694	67.291	62.1771	Dusp6	dual_specificity_phosphatase_6
ENSMUSG00000002395	76.0988	66.4483	66.3803	53.1549	52.287	56.7658	72.0288	77.8492	74.9363	41.2083	49.5604	44.4736	Use1	unconventional_SNARE_in_the_ER_1_homolog_(S._cerevisiae)
ENSMUSG00000020238	48.114	50.9955	44.2786	56.2271	52.1878	60.228	40.0101	38.596	40.5469	55.5048	47.6782	64.7044	Ncln	nicalin_homolog_(zebrafish)
ENSMUSG00000039515	79.9496	67.0683	74.1945	47.6427	52.1236	53.5662	51.9633	51.9794	48.5196	46.1638	48.4716	47.7111	Ppp2r4	protein_phosphatase_2A_activator_regulatory_subunit_B
ENSMUSG00000025403	77.4678	77.4368	75.0848	57.0333	52.1083	52.9486	82.7344	82.4465	96.879	102.609	102.154	118.985	Shmt2	serine_hydroxymethyltransferase_2_(mitochondrial)
ENSMUSG00000022754	1.38408	0.791327	1.05197	57.4429	52.0599	38.6011	1.80924	1.82542	3.4333	12.3521	11.6605	11.9003	Tmem45a	transmembrane_protein_45a
ENSMUSG00000028173	102.884	128.316	112.704	50.0867	52.044	52.2862	116.46	117.734	107.529	46.4161	37.5679	38.2487	Wls	wntless_homolog_(Drosophila)
ENSMUSG00000067889	10.922	7.75609	6.99805	54.2254	51.98	56.1577	12.346	11.411	12.5324	32.7023	26.4949	34.3732	Sptbn2	spectrin_beta_non-erythrocytic_2
ENSMUSG00000008604	52.9808	55.7175	56.0957	48.5385	51.9454	51.8244	43.559	42.017	44.7894	45.211	45.9059	47.1309	Ubqln4	ubiquilin_4
ENSMUSG00000055653	145.439	104.962	102.875	50.0659	51.9428	55.5261	91.0055	96.4909	98.1202	61.1771	53.2215	59.6337	Gpc3	glypican_3
ENSMUSG00000029147	103.157	98.1626	97.0719	49.2197	51.9096	45.9426	103.371	97.9987	100.173	60.4068	55.8324	59.3862	Ppm1g	protein_phosphatase_1G_(formerly_2C)_magnesium-dependent_gamma_isoform
ENSMUSG00000007721	82.9413	87.0849	90.3387	49.5218	51.8948	46.448	77.6714	79.7098	94.9898	55.3208	57.5445	56.4864	Ccdc124	coiled-coil_domain_containing_124
ENSMUSG00000029036	46.1865	44.3061	49.3722	51.7023	51.8904	56.3758	42.0842	42.0263	43.5098	66.1868	60.3906	71.6013	Atad3a	ATPase_family_AAA_domain_containing_3A
ENSMUSG00000005204	69.1946	71.6426	75.1981	49.8623	51.8861	49.3097	57.8855	57.3322	59.6751	48.9592	53.4633	53.7526	Senp3	SUMO/sentrin_specific_peptidase_3
ENSMUSG00000000278	6.69049	5.61589	8.08145	53.1474	51.8783	56.6997	6.91528	5.00334	6.3333	5.98422	6.3911	6.57958	Scpep1	serine_carboxypeptidase_1
ENSMUSG00000003437	40.6216	39.6496	41.493	48.9475	51.8629	52.5765	31.1213	34.0479	36.6656	40.031	37.4441	41.3812	Paf1	Paf1_RNA_polymerase_II_associated_factor_homolog_(S._cerevisiae)
ENSMUSG00000029177	76.1711	87.9972	77.2701	49.1786	51.8177	53.5735	72.0652	66.623	75.1653	55.2732	53.869	61.3293	Cenpa	centromere_protein_A
ENSMUSG00000001833	30.8545	46.2276	55.6666	49.233	51.8107	52.9753	37.7534	45.6879	41.7797	43.354	45.9098	40.9134	2020-09-07	septin_7
ENSMUSG00000027673	48.3017	46.9198	51.9616	49.2859	51.7853	52.0412	40.0979	46.0602	39.6897	47.7816	51.2123	48.3545	Ndufb5	NADH_dehydrogenase_(ubiquinone)_1_beta_subcomplex_5
ENSMUSG00000002043	28.9676	31.026	29.5933	55.5798	51.7425	54.8227	31.8254	28.6637	30.9364	40.0012	46.473	41.8443	Trappc6a	trafficking_protein_particle_complex_6A
ENSMUSG00000028693	76.7751	86.251	97.5997	48.7924	51.7163	49.6725	70.6768	73.6956	71.5771	39.8958	38.6151	40.8422	Nasp	nuclear_autoantigenic_sperm_protein_(histone-binding)
ENSMUSG00000028861	59.9703	55.7309	61.1118	56.0457	51.6805	56.0759	48.0435	47.9637	43.6788	47.2869	49.6081	45.3852	Mrps15	mitochondrial_ribosomal_protein_S15
ENSMUSG00000011114	37.8843	34.6382	42.0465	52.0551	51.6593	56.4256	34.6033	39.0481	40.4447	52.3525	52.2882	58.2075	Tbrg1	transforming_growth_factor_beta_regulated_gene_1
ENSMUSG00000032042	64.4801	56.3738	51.6205	45.1357	51.6563	52.7452	49.0881	43.5949	55.2253	47.2485	44.1755	48.5062	Srpr	signal_recognition_particle_receptor_('docking_protein')
ENSMUSG00000037573	26.2195	34.8573	20.9121	52.5001	51.6461	50.5035	30.544	32.1341	41.2229	41.4323	41.3635	40.3138	Tob1	transducer_of_ErbB-2.1
ENSMUSG00000049940	42.3283	42.871	43.652	54.0112	51.6258	53.1475	40.4168	37.7777	38.1383	42.3357	41.9813	42.6213	Pgrmc2	progesterone_receptor_membrane_component_2
ENSMUSG00000052296	70.8552	65.3816	66.6962	47.0662	51.5775	49.3508	65.0867	60.5767	57.6744	47.2299	51.1384	48.767	Ppp6r1	protein_phosphatase_6_regulatory_subunit_1
ENSMUSG00000015759	45.6339	49.7306	48.2828	44.3711	51.5281	48.1757	44.6896	52.1309	48.1432	35.0213	36.6737	40.8486	Cnih1	cornichon_homolog_1_(Drosophila)
ENSMUSG00000053329	39.5281	43.4774	44.5222	54.7341	51.4399	48.6382	32.6466	31.1092	33.1976	39.6744	47.5758	38.7291	D10Jhu81e	DNA_segment_Chr_10_Johns_Hopkins_University_81_expressed
ENSMUSG00000026860	32.5997	31.1773	34.9224	57.8143	51.423	54.33	31.4232	30.7281	31.1169	40.9767	42.1898	45.6075	Sh3glb2	SH3-domain_GRB2-like_endophilin_B2
ENSMUSG00000091896	45.4335	57.235	60.098	48.377	51.3276	47.0403	53.7783	52.2949	50.2782	45.12	47.2494	46.6766	Ube2d2a	ubiquitin-conjugating_enzyme_E2D_2A
ENSMUSG00000025151	131.806	146.159	136.576	54.4621	51.3174	61.3558	81.1952	77.9298	82.1151	24.7967	24.3256	22.0424	Maged1	melanoma_antigen_family_D_1
ENSMUSG00000030298	39.6417	51.1741	48.5182	52.1273	51.2914	48.8088	45.7422	45.6176	50.9555	48.0793	54.8353	54.5891	Sec13	SEC13_homolog_(S._cerevisiae)
ENSMUSG00000026245	39.3367	35.7341	42.8889	49.5901	51.2609	46.547	39.0858	37.39	40.2369	54.6795	58.7622	54.9667	Farsb	phenylalanyl-tRNA_synthetase_beta_subunit
ENSMUSG00000036856	175.662	130.394	117.738	48.7365	51.2527	48.1828	147.599	166.305	128.31	72.3514	58.5032	67.7331	Wnt4	wingless-type_MMTV_integration_site_family_member_4
ENSMUSG00000036112	57.074	50.8141	61.2102	47.946	51.224	47.6879	50.1022	49.9999	51.719	60.103	66.787	65.8635	Metap2	methionine_aminopeptidase_2
ENSMUSG00000028657	15.4865	19.106	16.3871	49.7802	51.194	54.9476	11.9822	12.2025	13.692	15.1603	16.4076	17.4972	Ppt1	palmitoyl-protein_thioesterase_1
ENSMUSG00000015341	42.0816	53.4155	49.0433	46.0791	51.1861	49.521	45.3266	41.1065	43.6049	48.713	49.8771	49.6301	Golga7	golgi_autoantigen_golgin_subfamily_a_7
ENSMUSG00000008892	60.7637	73.0394	81.653	50.9739	51.1489	46.2363	55.8952	58.2368	51.5446	40.2682	45.5335	42.1596	Vdac3	voltage-dependent_anion_channel_3
ENSMUSG00000024331	4.14163	4.70688	3.85748	49.4491	51.1277	44.3361	1.15843	0.920067	1.48958	6.68335	5.87833	9.16073	Dsc2	desmocollin_2
ENSMUSG00000046352	128.726	187.982	175.035	55.3305	51.1124	52.1586	22.8702	25.7547	23.9778	14.9977	18.1678	22.6622	Gjb2	gap_junction_protein_beta_2
ENSMUSG00000021222	22.8676	26.9661	24.9916	51.4729	51.1097	53.9668	25.5446	21.9489	26.3565	31.6284	29.2536	35.9011	Dcaf4	DDB1_and_CUL4_associated_factor_4
ENSMUSG00000028919	62.7123	63.0604	62.5394	53.7145	51.0218	47.5432	55.5565	53.3886	52.0732	78.9173	68.0344	74.9607	Arhgef19	Rho_guanine_nucleotide_exchange_factor_(GEF)_19
ENSMUSG00000041548	28.9413	36.0475	27.0459	48.9638	50.9158	41.2371	27.1501	26.8243	29.8177	29.1394	34.6578	33.2891	Hspb8	heat_shock_protein_8
ENSMUSG00000056692	73.7384	58.211	61.3427	51.1577	50.8601	49.527	63.8187	61.3395	60.1366	57.625	56.4617	54.9727	D17Wsu92e	DNA_segment_Chr_17_Wayne_State_University_92_expressed
ENSMUSG00000022961	35.4982	45.1589	41.6965	52.8377	50.8308	45.2886	32.2761	29.3647	31.1483	41.0578	38.7058	44.9442	Son	Son_DNA_binding_protein
ENSMUSG00000036323	54.2939	46.3372	53.4963	53.1743	50.7997	47.8629	46.9742	44.2856	45.2885	48.7428	48.5748	45.3076	Srp72	signal_recognition_particle_72
ENSMUSG00000041459	45.2516	60.5294	66.72	49.888	50.791	52.2828	44.767	45.8953	47.9522	44.7489	42.1846	42.5036	Tardbp	TAR_DNA_binding_protein
ENSMUSG00000032115	68.3694	55.8734	47.4319	48.7695	50.7585	50.972	38.8343	38.5626	47.4986	43.3365	41.7188	52.5852	Hyou1	hypoxia_up-regulated_1
ENSMUSG00000001435	183.856	208.74	179.524	43.4561	50.7423	51.7469	96.585	96.7669	100.214	51.0731	39.9491	52.7865	Col18a1	collagen_type_XVIII_alpha_1
ENSMUSG00000025544	25.1401	31.4556	30.4564	49.1092	50.6992	49.218	28.4003	28.31	27.1319	32.7331	30.427	38.7331	Tm9sf2	transmembrane_9_superfamily_member_2
ENSMUSG00000024841	22.142	24.4938	27.5581	47.1406	50.6544	53.2963	21.7556	21.567	21.9693	22.9227	22.3808	23.3465	Eif1ad	eukaryotic_translation_initiation_factor_1A_domain_containing
ENSMUSG00000031740	28.1143	26.4727	28.0417	52.8296	50.6512	48.231	10.2528	7.71214	11.1361	18.7455	19.2749	18.5365	Mmp2	matrix_metallopeptidase_2
ENSMUSG00000000355	12.9191	26.8155	26.2443	50.3428	50.6359	57.7416	25.0658	30.5272	27.1386	47.5652	48.2551	47.4467	Mcts1	malignant_T_cell_amplified_sequence_1
ENSMUSG00000000088	80.2495	94.5085	93.3891	54.5712	50.6302	50.4645	73.644	76.3719	89.6876	57.1899	51.995	55.545	Cox5a	cytochrome_c_oxidase_subunit_Va
ENSMUSG00000038429	60.2293	56.6747	60.9088	49.5756	50.5994	52.29	60.4787	57.7966	57.8545	51.3697	50.6323	51.3877	Usp5	ubiquitin_specific_peptidase_5_(isopeptidase_T)
ENSMUSG00000028382	16.8739	23.4521	26.7055	45.9804	50.4947	44.091	30.7116	30.5076	32.3037	39.7664	44.155	40.3593	Ptbp3	polypyrimidine_tract_binding_protein_3
ENSMUSG00000028790	72.0193	92.0368	104.328	46.6448	50.4858	48.2737	81.5002	81.8101	74.3751	45.0852	47.2029	41.8326	Khdrbs1	KH_domain_containing_RNA_binding_signal_transduction_associated_1
ENSMUSG00000035011	22.5683	20.4183	20.9689	54.2441	50.421	53.4828	20.5875	19.8879	22.8839	35.2815	34.1156	36.6608	Zbtb7a	zinc_finger_and_BTB_domain_containing_7a
ENSMUSG00000028741	47.9433	62.7781	60.546	47.3522	50.4186	55.3176	46.8882	44.9676	52.2482	51.264	59.6946	54.324	Mrto4	MRT4_mRNA_turnover_4_homolog_(S._cerevisiae)
ENSMUSG00000045763	71.246	63.7602	62.4965	40.6914	50.4032	48.6594	16.3049	14.8421	12.0095	3.76547	3.12573	1.13436	Basp1	brain_abundant_membrane_attached_signal_protein_1
ENSMUSG00000029836	79.4174	81.0232	110.422	42.4551	50.3886	47.1279	86.6735	108.851	87.1309	45.4082	46.7986	43.4998	Cbx3	chromobox_3
ENSMUSG00000021124	37.7529	36.087	36.1983	47.8022	50.3816	51.9023	28.0775	30.1254	29.7112	30.4751	35.1832	30.1121	Vti1b	vesicle_transport_through_interaction_with_t-SNAREs_1B
ENSMUSG00000042524	25.3119	22.0096	19.5718	51.477	50.3628	51.2399	23.0417	21.5032	21.8278	25.2981	20.2014	27.9847	Sun2	Sad1_and_UNC84_domain_containing_2
ENSMUSG00000010277	52.5138	41.3406	44.0106	48.626	50.2723	47.6219	41.9877	41.1023	38.8801	47.1674	45.0575	46.625	2610507B11Rik	RIKEN_cDNA_2610507B11_gene
ENSMUSG00000020850	89.8001	81.414	85.9603	50.9896	50.1811	45.0102	67.2234	59.3562	69.7055	58.8893	60.0039	62.294	Prpf8	pre-mRNA_processing_factor_8
ENSMUSG00000029723	39.1667	34.7648	34.102	50.521	50.1495	51.2621	31.7698	32.3432	35.0522	36.1878	40.6498	38.0791	Tsc22d4	TSC22_domain_family_member_4
ENSMUSG00000005656	31.0012	35.9533	40.2122	50.7732	50.1254	46.5632	29.6737	30.7693	29.4632	37.1706	39.7562	34.3238	Snx6	sorting_nexin_6
ENSMUSG00000030792	0.827994	1.02105	1.29235	52.8075	50.0409	53.3324	1.01194	1.96563	2.7867	0.892974	2.34044	3.0559	Dkkl1	dickkopf-like_1
ENSMUSG00000032199	87.4624	90.2955	107.474	50.4071	50.0016	57.1561	76.3894	75.4986	69.3913	47.0069	48.3133	46.5023	Polr2m	polymerase_(RNA)_II_(DNA_directed)_polypeptide_M
ENSMUSG00000028821	31.259	32.9397	31.6887	51.8063	49.9723	51.5633	29.1081	31.8949	37.8176	40.2368	40.2509	47.5926	Syf2	SYF2_homolog_RNA_splicing_factor_(S._cerevisiae)
ENSMUSG00000028127	22.4509	24.9148	23.4269	51.0721	49.9536	50.2156	24.1546	24.0259	24.1218	27.9374	27.7616	28.3864	Abcd3	ATP-binding_cassette_sub-family_D_(ALD)_member_3
ENSMUSG00000059040	96.8235	66.907	55.0129	68.5962	49.8878	20.2162	21.9791	20.7208	41.7462	39.5261	39.7235	46.9714	Eno1b	enolase_1B_retrotransposed
ENSMUSG00000022203	67.7513	71.8713	62.1769	52.9338	49.8807	52.1261	60.0563	52.3116	57.1437	48.8589	45.2676	51.3447	Efs	embryonal_Fyn-associated_substrate
ENSMUSG00000053398	181.709	172.176	173.579	57.8364	49.8714	51.2244	191.366	193.322	187.039	207.286	234.561	223.653	Phgdh	3-phosphoglycerate_dehydrogenase
ENSMUSG00000037824	40.7114	35.7965	31.3659	51.6088	49.8052	50.7045	38.3492	37.7543	34.6627	33.985	35.9682	33.5927	Tspan14	tetraspanin_14
ENSMUSG00000020538	30.5484	29.2946	28.9515	49.4457	49.7861	49.795	34.4435	31.0943	36.7248	41.0892	34.4964	43.9337	Srebf1	sterol_regulatory_element_binding_transcription_factor_1
ENSMUSG00000019139	123.679	133.055	132.374	49.3364	49.726	48.57	83.1381	79.1665	93.7579	84.2973	80.0996	82.6084	Isyna1	myo-inositol_1-phosphate_synthase_A1
ENSMUSG00000035504	12.7481	10.3445	10.3408	51.0464	49.7104	53.3742	6.36971	6.73471	7.99878	13.5123	13.0501	15.6452	Reep6	receptor_accessory_protein_6
ENSMUSG00000011096	69.0106	66.5194	69.1999	49.5849	49.6889	47.2414	50.9088	48.6298	51.5194	43.6609	42.0875	44.4562	Akt1s1	AKT1_substrate_1_(proline-rich)
ENSMUSG00000074748	51.8992	48.3026	54.168	50.5202	49.6781	48.8509	40.2534	43.8791	35.0348	37.1973	39.8815	34.1058	Atxn7l3b	ataxin_7-like_3B
ENSMUSG00000027881	30.7095	47.3649	49.5453	48.6362	49.6092	55.8028	37.6859	39.3446	42.6823	54.7287	47.4883	54.5958	Prpf38b	PRP38_pre-mRNA_processing_factor_38_(yeast)_domain_containing_B
ENSMUSG00000026229	60.2479	47.4712	55.4672	47.7831	49.5873	45.9283	50.7601	47.4793	49.6245	48.7454	54.8926	49.3116	Psmd1	proteasome_(prosome_macropain)_26S_subunit_non-ATPase_1
ENSMUSG00000004929	40.3936	35.7235	37.875	54.9815	49.4631	61.4769	30.8916	29.8473	28.4667	34.1498	33.1268	36.5216	Thop1	thimet_oligopeptidase_1
ENSMUSG00000023118	78.5238	66.1555	66.0848	47.6764	49.4113	50.3234	59.1085	55.5395	60.7522	44.958	47.8271	50.5349	Sympk	symplekin
ENSMUSG00000075701	28.2316	31.5544	27.5295	45.2318	49.3992	50.3747	21.6225	22.0594	26.2172	31.5088	31.9263	31.6931	Vimp	VCP-interacting_membrane_protein
ENSMUSG00000036225	7.96648	8.85237	8.01605	46.6879	49.3754	46.9076	8.38049	8.49133	8.73745	16.4637	16.3321	17.4478	Kctd1	potassium_channel_tetramerisation_domain_containing_1
ENSMUSG00000025144	42.8224	46.9979	43.7064	56.7008	49.3116	50.7588	42.9154	41.6123	39.2868	45.548	49.4801	47.1796	Stra13	stimulated_by_retinoic_acid_13
ENSMUSG00000068856	70.4157	75.765	87.1703	48.7488	49.2224	48.4185	74.0861	67.3734	66.359	56.8449	59.3527	53.5564	Sf3b4	splicing_factor_3b_subunit_4
ENSMUSG00000001420	9.10332	9.40608	7.67622	49.7367	49.1737	45.9503	8.99946	9.3281	9.78091	22.0357	20.9529	23.5118	Tmem79	transmembrane_protein_79
ENSMUSG00000031696	30.8421	38.72	40.3678	49.3451	49.1534	45.7003	38.5553	41.1801	39.9322	47.4178	53.2812	48.8035	Vps35	vacuolar_protein_sorting_35
ENSMUSG00000015093	3.78486	3.1957	2.04503	52.0544	49.1174	56.6514	6.36195	6.1013	7.91891	18.7754	17.5753	21.1531	Clic3	chloride_intracellular_channel_3
ENSMUSG00000028433	54.153	50.5878	57.1334	50.0849	49.0984	51.5545	50.4967	49.8718	57.4837	46.4276	44.768	47.8697	Ubap2	ubiquitin-associated_protein_2
ENSMUSG00000034880	68.5287	86.8075	81.497	46.4996	49.0401	45.6977	55.3136	59.0125	58.5206	47.6625	45.5529	43.5749	Mrpl34	mitochondrial_ribosomal_protein_L34
ENSMUSG00000009090	25.2151	22.1191	21.873	45.8785	48.9925	51.413	18.5957	18.4714	17.5904	27.9436	31.0037	28.9596	Ap1b1	adaptor_protein_complex_AP-1_beta_1_subunit
ENSMUSG00000037331	59.4014	51.682	52.6483	48.6931	48.9479	45.6995	50.129	46.4119	48.3111	57.1301	59.2978	61.2182	Larp1	La_ribonucleoprotein_domain_family_member_1
ENSMUSG00000014402	38.4073	37.6302	40.6641	45.519	48.9122	46.6767	35.3063	40.5162	33.6647	34.96	36.3128	36.4186	Tsg101	tumor_susceptibility_gene_101
ENSMUSG00000029152	36.2739	36.0315	35.3079	45.5684	48.8641	50.2415	29.2033	29.7596	31.5357	39.079	38.3055	41.2296	Ociad1	OCIA_domain_containing_1
ENSMUSG00000064193	104.143	98.0781	72.5232	57.2597	48.8493	33.9958	39.5772	35.5053	59.5203	70.2929	68.4122	68.6455	Gm4735	predicted_gene_4735
ENSMUSG00000001729	143.355	139.905	151.594	52.0936	48.841	54.4149	160.292	148.625	138.76	93.2442	84.5251	84.9727	Akt1	thymoma_viral_proto-oncogene_1
ENSMUSG00000021917	35.9362	45.05	45.8736	47.8076	48.823	49.4343	42.7071	44.529	48.0267	46.2956	44.1532	48.2602	Spcs1	signal_peptidase_complex_subunit_1_homolog_(S._cerevisiae)
ENSMUSG00000032058	22.684	24.2699	26.6842	45.5972	48.8012	46.7934	19.8376	18.3104	18.0291	19.3325	23.6462	22.335	Ppp2r1b	protein_phosphatase_2_regulatory_subunit_A_beta
ENSMUSG00000022867	16.3583	20.9642	21.2754	52.0181	48.7973	42.6316	19.3246	18.2377	19.3708	32.4178	34.6877	34.666	Usp25	ubiquitin_specific_peptidase_25
ENSMUSG00000054252	24.7206	19.5182	16.9369	51.2858	48.7369	57.0424	54.8635	53.0468	54.8659	82.6657	66.4704	81.3771	Fgfr3	fibroblast_growth_factor_receptor_3
ENSMUSG00000072825	49.6973	38.1034	36.5718	48.8357	48.7344	52.8317	53.3539	48.556	51.3018	63.5051	65.4814	63.7998	Cep170b	centrosomal_protein_170B
ENSMUSG00000032280	42.4587	42.8748	42.1513	49.0416	48.7231	52.3	34.6658	32.8407	33.9491	27.8182	30.9412	29.7273	Tle3	transducin-like_enhancer_of_split_3_homolog_of_Drosophila_E(spl)
ENSMUSG00000059811	13.3405	18.5444	14.9724	44.4087	48.7123	48.326	15.7633	15.6721	18.5552	26.0359	22.8527	30.7392	Atl2	atlastin_GTPase_2
ENSMUSG00000030339	10.6874	12.5111	11.9202	47.7995	48.6803	50.7638	10.7291	9.75326	8.93512	14.6384	14.7766	16.1526	Ltbr	lymphotoxin_B_receptor
ENSMUSG00000078427	56.4465	64.7976	67.3175	47.7491	48.6796	49.7225	48.783	61.691	58.7982	48.2143	50.8187	45.9528	Sarnp	SAP_domain_containing_ribonucleoprotein
ENSMUSG00000033060	9.91957	9.72059	7.929	49.1163	48.6519	51.9668	16.7736	16.1025	16.2701	16.0987	15.7551	19.3014	Lmo7	LIM_domain_only_7
ENSMUSG00000017802	36.6804	34.018	34.1769	46.723	48.6182	49.7565	30.6494	30.7584	29.657	31.3246	28.1599	30.338	Fam134c	family_with_sequence_similarity_134_member_C
ENSMUSG00000000320	3.44404	3.42145	3.39838	48.6267	48.5557	47.9101	2.60805	1.85323	3.57146	13.6363	15.9742	18.6799	Alox12	arachidonate_12-lipoxygenase
ENSMUSG00000020949	67.8525	84.1726	85.8865	51.2056	48.5368	52.9119	50.0922	59.3528	59.9351	47.2574	50.7302	51.8569	Fkbp3	FK506_binding_protein_3
ENSMUSG00000061887	134.173	123.288	125.807	42.3925	48.5272	46.3301	96.8311	97.072	94.235	39.9708	38.656	36.4667	Ssbp3	single-stranded_DNA_binding_protein_3
ENSMUSG00000024811	47.6185	57.3254	56.2583	45.9116	48.5131	45.5871	42.3351	37.8369	40.9267	40.8248	41.4617	43.0905	Tnks2	tankyrase_TRF1-interacting_ankyrin-related_ADP-ribose_polymerase_2
ENSMUSG00000042354	26.5335	37.3022	44.1642	53.6463	48.4849	55.3169	30.2773	32.3634	33.3845	62.0129	57.8703	67.7372	Gnl3	guanine_nucleotide_binding_protein-like_3_(nucleolar)
ENSMUSG00000007670	87.5874	93.9651	82.1615	46.1371	48.4663	61.2514	51.2006	53.2637	59.8672	51.7866	55.9779	49.603	Khsrp	KH-type_splicing_regulatory_protein
ENSMUSG00000027750	164.275	139.954	137.287	49.8518	48.4654	59.5318	288.522	277.554	286.722	310.758	264.832	274.519	Postn	periostin_osteoblast_specific_factor
ENSMUSG00000002968	50.9315	53.8599	53.6326	52.7772	48.4612	51.3931	48.2222	44.183	47.3504	47.1062	44.9491	48.899	Med25	mediator_complex_subunit_25
ENSMUSG00000071054	64.5654	72.4749	72.1226	51.1852	48.4542	54.7083	54.3163	58.4913	64.5306	53.8978	50.9074	55.1157	Safb	scaffold_attachment_factor_B
ENSMUSG00000059182	51.6066	61.8149	66.8466	51.515	48.4398	43.7663	46.4726	47.4623	44.2954	45.5052	46.5746	40.2759	Skap2	src_family_associated_phosphoprotein_2
ENSMUSG00000040054	20.2254	19.6231	18.3029	47.2582	48.3966	45.8701	16.0589	14.6759	17.7226	28.8285	26.3521	30.6413	Baz2a	bromodomain_adjacent_to_zinc_finger_domain_2A
ENSMUSG00000049299	35.7527	35.7803	38.8397	50.6728	48.332	46.3376	33.3437	31.0248	30.7595	28.0206	27.3693	28.7488	Trappc1	trafficking_protein_particle_complex_1
ENSMUSG00000021843	28.0322	31.4593	28.6618	46.7644	48.3034	46.7594	30.556	33.1093	30.4294	41.2102	38.2909	42.9505	Ktn1	kinectin_1
ENSMUSG00000019814	26.3488	33.2711	32.8108	50.9494	48.1479	53.3806	30.7984	31.3807	31.216	58.559	60.5659	62.0104	Ltv1	LTV1_homolog_(S._cerevisiae)
ENSMUSG00000027952	23.7218	22.3937	20.695	51.1248	48.1405	47.8238	19.399	20.4486	40.3162	43.3062	54.3529	51.3582	Pmvk	phosphomevalonate_kinase
ENSMUSG00000021094	12.6095	8.24657	6.90299	50.6396	48.1399	52.4152	8.48952	7.51884	10.9963	26.6125	27.7346	31.8549	Dhrs7	dehydrogenase/reductase_(SDR_family)_member_7
ENSMUSG00000005198	68.9341	66.9616	65.0121	49.0834	48.1123	47.1855	52.7215	51.2006	68.1781	49.657	43.3788	52.4282	Polr2a	polymerase_(RNA)_II_(DNA_directed)_polypeptide_A
ENSMUSG00000063576	63.786	63.624	63.4775	49.0063	48.1075	54.1228	55.0565	52.7649	54.5017	46.9551	41.6404	43.9525	Klhdc3	kelch_domain_containing_3
ENSMUSG00000025016	33.0646	41.3431	40.6638	46.3952	48.1057	46.9898	41.0941	39.572	39.4475	38.126	37.7204	39.9895	Tm9sf3	transmembrane_9_superfamily_member_3
ENSMUSG00000052337	55.8383	49.037	49.6668	48.9296	48.0747	44.6452	46.5274	46.6763	47.648	48.147	49.4736	52.6515	Immt	inner_membrane_protein_mitochondrial
ENSMUSG00000051154	68.1754	76.5805	81.5718	51.6431	48.0701	54.7511	63.1948	73.5047	65.2297	44.7557	39.1821	45.708	Commd3	COMM_domain_containing_3
ENSMUSG00000022139	14.0774	22.7224	21.8695	47.7938	47.9797	44.4702	14.1655	15.8485	16.4	20.1279	21.3683	21.2174	Mbnl2	muscleblind-like_2
ENSMUSG00000038416	60.7822	61.7438	64.9397	48.1507	47.9546	45.1378	46.6362	51.203	46.377	42.0744	41.3763	40.9744	Cdc16	CDC16_cell_division_cycle_16
ENSMUSG00000024165	75.2312	74.7595	86.168	45.6122	47.9254	46.2956	58.6261	61.7273	55.5924	34.1766	39.3498	36.9366	Hn1l	hematological_and_neurological_expressed_1-like
ENSMUSG00000063838	22.956	29.6432	28.0178	36.1456	47.9244	42.0132	14.3802	11.5445	12.5478	18.5855	16.0926	16.6017	Cdc42ep5	CDC42_effector_protein_(Rho_GTPase_binding)_5
ENSMUSG00000036940	61.9337	57.8398	60.3405	47.5771	47.9141	50.5186	62.14	60.6374	60.7582	48.0671	43.3415	43.524	Kdm1a	lysine_(K)-specific_demethylase_1A
ENSMUSG00000020629	32.3735	41.3005	41.402	43.9384	47.8234	39.948	24.6748	24.0434	26.0361	25.7782	29.2993	29.4483	Adi1	acireductone_dioxygenase_1
ENSMUSG00000020265	76.0053	76.4725	88.4363	43.9098	47.7937	46.1966	70.4712	70.1436	67.1887	52.0835	49.3516	51.354	Sumo3	SMT3_suppressor_of_mif_two_3_homolog_3_(yeast)
ENSMUSG00000030835	49.8804	48.2986	47.1037	45.2445	47.7549	48.526	47.6066	45.2161	57.4369	44.9278	39.765	52.6259	Nomo1	nodal_modulator_1
ENSMUSG00000025917	40.449	44.3052	48.3217	43.9347	47.7504	49.867	33.9253	38.7098	39.6225	40.7705	45.6296	41.062	Cops5	COP9_(constitutive_photomorphogenic)_homolog_subunit_5_(Arabidopsis_thaliana)
ENSMUSG00000056952	27.2751	25.8549	24.7795	46.695	47.7406	44.4714	25.6524	21.5946	24.5793	31.9541	31.6839	37.9795	Tatdn2	TatD_DNase_domain_containing_2
ENSMUSG00000037643	42.7763	53.67	54.0952	46.0288	47.6574	41.3458	39.9509	36.7555	36.1589	52.1707	53.8313	53.4573	Prkci	protein_kinase_C_iota
ENSMUSG00000027367	47.2839	44.8548	47.9545	46.1364	47.6369	46.9916	37.6387	33.8612	30.7774	36.8275	38.0314	38.3753	Stard7	START_domain_containing_7
ENSMUSG00000035172	32.8995	31.8571	28.4908	49.236	47.6023	48.748	52.6913	48.3623	53.2024	51.2878	44.8166	55.7668	Plekhh3	pleckstrin_homology_domain_containing_family_H_(with_MyTH4_domain)_member_3
ENSMUSG00000040714	20.1975	16.1817	14.7866	44.2024	47.5913	45.9106	24.6613	21.9938	23.974	36.6116	37.7991	36.2629	Klc3	kinesin_light_chain_3
ENSMUSG00000027405	46.5518	61.9569	53.8865	53.2701	47.57	51.3626	36.3669	40.7595	39.8674	54.9409	48.9601	61.2174	Nop56	NOP56_ribonucleoprotein
ENSMUSG00000007872	95.43	127.204	87.5823	52.8131	47.5236	41.1623	180.773	151.293	188.149	173.59	237.405	143.948	Id3	inhibitor_of_DNA_binding_3
ENSMUSG00000018736	25.1109	24.3327	24.6878	49.3067	47.507	47.4619	26.2863	23.4145	24.8845	37.3854	40.6834	40.2032	Ndel1	nuclear_distribution_gene_E-like_homolog_1_(A._nidulans)
ENSMUSG00000014349	42.2095	42.0771	43.1224	46.1193	47.4454	48.4078	36.7279	34.6969	33.8335	30.4249	34.8975	29.4054	Ube2z	ubiquitin-conjugating_enzyme_E2Z_(putative)
ENSMUSG00000036180	32.0146	32.4298	37.5963	45.2387	47.4405	45.6602	33.8481	33.9678	33.885	37.285	36.8686	39.1208	Gatad2a	GATA_zinc_finger_domain_containing_2A
ENSMUSG00000029330	24.9159	20.677	20.1844	48.9427	47.4241	48.4808	22.4973	20.0837	20.0341	45.8764	45.0705	48.0671	Cds1	CDP-diacylglycerol_synthase_1
ENSMUSG00000059995	54.0522	55.0963	52.7619	46.9851	47.4231	48.6791	55.8699	50.1333	50.4914	47.2746	40.1459	46.0629	Atxn7l3	ataxin_7-like_3
ENSMUSG00000025156	63.9925	71.3087	75.5757	46.8786	47.422	53.2549	61.6208	61.5123	55.5702	52.3879	49.7941	51.5358	Gps1	G_protein_pathway_suppressor_1
ENSMUSG00000086390	8.67107	13.5439	10.4675	49.5875	47.403	63.7671	8.27703	8.73852	9.89771	30.0642	24.8304	35.0543	1810019D21Rik	RIKEN_cDNA_1810019D21_gene
ENSMUSG00000030282	30.8117	31.0986	30.674	43.8198	47.401	52.1149	18.8716	20.1476	16.4688	22.0488	23.7818	27.4089	Cmas	cytidine_monophospho-N-acetylneuraminic_acid_synthetase
ENSMUSG00000034484	32.0081	36.5171	41.1104	52.4354	47.3812	48.2453	31.0654	31.5274	34.4232	47.6683	50.7529	46.0751	Snx2	sorting_nexin_2
ENSMUSG00000028788	67.0332	69.0595	73.6313	43.6051	47.3754	45.7511	64.5091	67.1709	63.049	48.1856	52.494	51.1715	Ptp4a2	protein_tyrosine_phosphatase_4a2
ENSMUSG00000000552	74.7736	76.7392	85.7756	49.417	47.2944	50.4156	84.7313	75.0651	88.867	83.3721	84.5987	83.8679	Zfp385a	zinc_finger_protein_385A
ENSMUSG00000042305	36.6905	38.8749	40.169	44.7085	47.2766	45.5473	30.3682	32.8676	32.1566	31.1122	32.051	32.3258	Tmem183a	transmembrane_protein_183A
ENSMUSG00000079111	41.5748	39.9342	35.9241	44.4817	47.272	47.3867	29.5928	33.5677	31.9332	32.7063	32.1678	36.4575	Kdelr2	KDEL_(Lys-Asp-Glu-Leu)_endoplasmic_reticulum_protein_retention_receptor_2
ENSMUSG00000001415	32.6174	35.3407	32.1868	47.9247	47.1786	45.5764	26.4627	25.598	25.9982	31.3127	30.2766	34.3013	Smg5	Smg-5_homolog_nonsense_mediated_mRNA_decay_factor_(C._elegans)
ENSMUSG00000020211	54.4348	64.843	69.5167	48.0382	47.117	46.2329	57.521	52.3835	60.3501	49.4408	50.056	47.0373	Sf3a2	splicing_factor_3a_subunit_2
ENSMUSG00000055681	44.7799	41.6353	40.8787	48.924	47.035	50.9194	37.8248	38.7845	39.8628	45.5827	44.9185	45.8112	Cope	coatomer_protein_complex_subunit_epsilon
ENSMUSG00000023022	44.0228	39.5926	38.5568	48.5654	46.9973	48.1443	29.1446	30.6097	29.0765	32.3547	35.8687	33.3887	Lima1	LIM_domain_and_actin_binding_1
ENSMUSG00000049882	18.4575	18.3226	22.8251	45.6953	46.9795	53.3141	19.1105	16.246	15.6542	27.2842	24.7946	28.163	Vcpkmt	valosin_containing_protein_lysine_(K)_methyltransferase
ENSMUSG00000027184	71.4791	79.6678	92.1592	43.4046	46.9498	47.1476	75.7306	78.4524	73.8012	54.6698	59.3426	50.5464	Caprin1	cell_cycle_associated_protein_1
ENSMUSG00000025487	58.4867	51.2436	53.392	45.1358	46.8781	47.1446	46.9606	53.583	53.0895	39.2232	42.1652	40.5677	Psmd13	proteasome_(prosome_macropain)_26S_subunit_non-ATPase_13
ENSMUSG00000058355	36.8643	45.1077	51.1781	43.4403	46.8678	46.0402	39.3234	42.0608	40.4769	52.7763	54.4938	52.3746	Abce1	ATP-binding_cassette_sub-family_E_(OABP)_member_1
ENSMUSG00000058756	31.8917	28.8169	29.5494	44.9183	46.8641	43.4175	30.5426	26.8641	26.3596	34.3449	29.7676	31.0318	Thra	thyroid_hormone_receptor_alpha
ENSMUSG00000020022	105.515	114.477	115.785	44.8215	46.7934	47.1672	67.0752	70.3233	85.3069	44.3132	46.7636	42.2623	Ndufa12	NADH_dehydrogenase_(ubiquinone)_1_alpha_subcomplex_12
ENSMUSG00000034412	39.4639	37.8404	33.8605	46.7238	46.7756	48.2984	56.8032	52.5444	61.8393	78.7763	81.2315	89.4079	Tbc1d10a	TBC1_domain_family_member_10a
ENSMUSG00000071533	38.7685	40.2475	50.341	44.1474	46.725	44.1891	40.7165	44.4621	37.9905	38.583	40.1144	40.4135	Pcnp	PEST_proteolytic_signal_containing_nuclear_protein
ENSMUSG00000019777	52.0736	66.1651	68.24	43.4742	46.7193	45.6844	59.7291	59.9543	59.8197	55.1113	56.7014	53.2241	Hdac2	histone_deacetylase_2
ENSMUSG00000041028	39.8853	43.3427	46.5121	46.3445	46.663	44.2564	40.833	39.4703	40.6189	46.1136	55.195	44.5602	Ghitm	growth_hormone_inducible_transmembrane_protein
ENSMUSG00000028447	31.0986	43.9337	37.4936	45.1747	46.6406	49.4956	37.8923	39.7679	40.6131	51.7957	44.7656	49.4208	Dctn3	dynactin_3
ENSMUSG00000021096	52.1024	49.4076	49.3381	43.1054	46.6195	39.873	47.0375	42.0458	45.1628	38.2903	41.2152	42.7097	Ppm1a	protein_phosphatase_1A_magnesium_dependent_alpha_isoform
ENSMUSG00000036275	76.1307	72.4766	69.5197	45.9618	46.6029	47.0879	58.566	56.4369	60.493	35.3718	33.0925	38.5121	9530068E07Rik	RIKEN_cDNA_9530068E07_gene
ENSMUSG00000038412	31.5358	40.2535	33.835	54.2287	46.5128	42.4894	33.8965	40.0122	40.2305	91.081	106.671	96.6371	Higd1a	HIG1_domain_family_member_1A
ENSMUSG00000035640	38.4817	40.4705	38.3219	49.4228	46.5068	50.1308	28.693	25.9769	31.6291	41.1749	39.2567	45.5326	Dos	downstream_of_Stk11
ENSMUSG00000027377	14.7554	8.12698	7.30985	42.6928	46.505	52.6722	38.3235	41.3902	39.561	36.5292	34.176	30.3908	Mall	mal_T_cell_differentiation_protein-like
ENSMUSG00000029110	24.933	32.9221	31.5292	44.0867	46.4891	45.3537	24.6088	23.4442	22.6082	29.2625	30.3639	30.3733	Rnf4	ring_finger_protein_4
ENSMUSG00000028042	13.1649	9.43999	9.20397	45.8003	46.4014	47.2367	31.2025	27.7644	30.0054	57.527	60.8734	57.293	Zbtb7b	zinc_finger_and_BTB_domain_containing_7B
ENSMUSG00000033272	66.8382	59.1626	62.9684	44.4654	46.3997	45.5279	53.5694	52.7534	48.1738	47.3472	47.4476	46.5163	Slc35a4	solute_carrier_family_35_member_A4
ENSMUSG00000032434	20.7965	21.5548	19.9505	45.2491	46.3848	45.3524	22.8754	21.9458	23.286	29.0025	31.3555	29.2248	Cmtm6	CKLF-like_MARVEL_transmembrane_domain_containing_6
ENSMUSG00000065990	42.4252	43.7535	47.1054	43.9268	46.3662	44.3541	44.5288	46.2841	37.4728	36.6565	41.1395	38.0505	Aurkaip1	aurora_kinase_A_interacting_protein_1
ENSMUSG00000018583	78.9665	77.46	86.7626	44.4136	46.3265	45.7989	67.3503	67.842	63.1179	48.6228	51.8389	48.1587	G3bp1	GTPase_activating_protein_(SH3_domain)_binding_protein_1
ENSMUSG00000079426	42.0436	34.8383	41.6864	46.4545	46.3192	44.8959	35.1267	36.5939	35.966	33.1911	39.943	34.3753	Arpc4	actin_related_protein_2/3_complex_subunit_4
ENSMUSG00000024758	35.1761	34.3023	30.5241	45.0858	46.3084	46.8192	30.8281	29.9238	29.9795	31.0399	33.0596	32.0933	Rtn3	reticulon_3
ENSMUSG00000030990	21.7748	20.0053	22.0635	46.4989	46.2733	48.4876	24.3092	23.5446	24.2249	36.2267	32.936	36.2078	Pgap2	post-GPI_attachment_to_proteins_2
ENSMUSG00000040462	38.7346	34.8709	31.4784	46.0499	46.2241	50.735	33.499	34.2319	36.9898	34.7391	29.5735	40.7145	Os9	amplified_in_osteosarcoma
ENSMUSG00000006589	163.99	175.525	189.714	50.4071	46.1755	48.227	137.861	142.926	151.853	58.5446	58.6299	55.232	Aprt	adenine_phosphoribosyl_transferase
ENSMUSG00000000171	77.4026	82.3858	89.217	44.6497	46.1719	45.8042	63.0366	70.643	62.0606	55.7228	60.4382	56.3426	Sdhd	succinate_dehydrogenase_complex_subunit_D_integral_membrane_protein
ENSMUSG00000016344	60.9669	69.0781	81.3573	44.1062	46.1587	50.4745	60.2796	58.2133	49.8939	26.5889	27.6397	23.6564	Ppdpf	pancreatic_progenitor_cell_differentiation_and_proliferation_factor_homolog_(zebrafish)RIKEN_cDNA_2700038C09_gene
ENSMUSG00000002658	66.4455	68.2704	64.8052	47.8824	46.1261	50.3068	43.4088	46.9785	53.4391	48.6655	49.2051	52.411	Gtf2f1	general_transcription_factor_IIF_polypeptide_1
ENSMUSG00000024507	36.0173	30.2921	31.3243	42.632	46.108	44.7088	26.7924	26.6288	27.5189	25.9121	30.3442	25.7601	Hsd17b4	hydroxysteroid_(17-beta)_dehydrogenase_4
ENSMUSG00000041815	34.8567	39.8246	43.7829	43.4354	46.0828	45.912	35.1024	36.2374	32.805	34.1026	33.2544	32.9982	Poldip3	polymerase_(DNA-directed)_delta_interacting_protein_3
ENSMUSG00000075590	14.1022	21.6181	16.9808	50.9526	46.0759	59.1683	26.4653	28.3614	28.4455	62.133	41.7332	61.2398	Nrbp2	nuclear_receptor_binding_protein_2
ENSMUSG00000053702	3.47319	4.33151	3.94406	41.9342	46.0742	45.2086	0.998284	1.37679	1.67272	3.45588	4.01961	4.14934	Nebl	nebulette
ENSMUSG00000062203	60.1248	56.2663	67.6565	47.8434	46.0645	44.849	46.1019	46.428	55.0143	49.3529	52.1571	54.1268	Gspt1	G1_to_S_phase_transition_1
ENSMUSG00000028923	40.8198	38.699	40.8361	42.5525	46.0389	51.1634	37.8329	36.6085	36.9424	33.5012	32.5345	29.2774	Necap2	NECAP_endocytosis_associated_2
ENSMUSG00000001424	93.9411	78.0105	80.8656	43.9279	45.9794	42.7831	84.4191	80.4833	89.0214	66.4454	63.9392	67.2117	Snd1	staphylococcal_nuclease_and_tudor_domain_containing_1
ENSMUSG00000068747	9.31265	7.87495	7.80944	46.4464	45.9714	42.7243	5.98635	5.16551	7.04893	25.9773	25.9933	28.9946	Sort1	sortilin_1
ENSMUSG00000022770	25.7669	26.4213	25.0948	45.7313	45.9581	44.3691	19.5317	20.0358	21.6628	30.9487	33.5366	32.3791	Dlg1	discs_large_homolog_1_(Drosophila)
ENSMUSG00000034160	21.6148	30.3967	21.5245	51.2685	45.8627	48.9463	19.1122	22.7108	23.0229	32.3126	23.1309	28.8442	Ogt	O-linked_N-acetylglucosamine_(GlcNAc)_transferase_(UDP-N-acetylglucosamine:polypeptide-N-acetylglucosaminyl_transferase)
ENSMUSG00000029247	103.077	101.582	112.558	42.385	45.8278	44.342	82.2447	84.354	76.5648	38.9452	41.2665	35.8245	Paics	phosphoribosylaminoimidazole_carboxylase_phosphoribosylaminoribosylaminoimidazole_succinocarboxamide_synthetase
ENSMUSG00000032515	43.2302	35.0461	18.1918	50.3369	45.7947	33.7693	68.8972	51.7027	88.4421	91.3999	122.078	85.2165	Csrnp1	cysteine-serine-rich_nuclear_protein_1
ENSMUSG00000071662	47.832	54.849	55.0062	43.2642	45.7892	43.3389	45.1308	49.6226	49.123	43.9524	49.3495	45.1553	Polr2g	polymerase_(RNA)_II_(DNA_directed)_polypeptide_G
ENSMUSG00000066900	61.9155	57.647	60.7482	42.2353	45.6543	44.028	52.3322	53.6844	50.3192	37.4749	37.6901	41.4644	Suds3	suppressor_of_defective_silencing_3_homolog_(S._cerevisiae)
ENSMUSG00000087590	25.6727	49.9013	18.6436	39.0362	45.6502	47.4017	37.1427	30.0872	24.9254	37.1533	43.3951	44.0898	2410004N09Rik	RIKEN_cDNA_2410004N09_gene
ENSMUSG00000054146	2401.34	1459.43	1474.86	59.4211	45.5871	63.4756	3139.68	3581.92	2959.28	3378.9	3436.65	2791.67	Krt15	keratin_15
ENSMUSG00000028847	49.4129	55.9627	54.0051	45.0118	45.5695	44.5356	44.5175	40.1522	45.1348	38.0243	37.2711	34.8454	Trappc3	trafficking_protein_particle_complex_3
ENSMUSG00000034320	10.2945	10.8072	9.03223	47.0075	45.5474	43.8904	8.93334	8.24308	8.67707	20.1034	19.8297	25.7011	Slc26a2	solute_carrier_family_26_(sulfate_transporter)_member_2
ENSMUSG00000038812	54.2061	62.8427	65.2137	50.0489	45.5297	43.8207	51.5882	51.2567	50.2426	43.6947	46.0519	44.6684	Trmt112	tRNA_methyltransferase_11-2
ENSMUSG00000000308	71.8358	55.3099	48.3273	54.2966	45.5288	43.2041	161.935	160.453	160.194	216.428	204.5	187.814	Ckmt1	creatine_kinase_mitochondrial_1_ubiquitous
ENSMUSG00000025369	55.0165	58.9992	62.7501	44.1139	45.5255	47.1125	52.7019	49.6682	53.1732	37.0574	35.6982	36.1356	Smarcc2	SWI/SNF_related_matrix_associated_actin_dependent_regulator_of_chromatin_subfamily_c_member_2
ENSMUSG00000001380	42.0554	37.0371	45.2488	44.9529	45.4581	39.2974	40.4895	38.4709	39.7751	43.1179	41.7147	42.8203	Hars	histidyl-tRNA_synthetase
ENSMUSG00000016257	29.821	38.698	42.6037	44.7919	45.3968	46.8695	33.3597	37.3863	36.9677	33.3926	37.8717	38.5975	Slmo2	slowmo_homolog_2_(Drosophila)
ENSMUSG00000037995	130.971	121.373	107.644	41.1648	45.3758	48.3538	122.08	118.387	132.153	42.6429	32.4358	39.9575	Igsf9	immunoglobulin_superfamily_member_9
ENSMUSG00000024309	101.949	105.182	114.585	48.6131	45.3526	49.9003	82.0595	85.9064	80.3057	64.6311	59.1811	68.6437	Pfdn6	prefoldin_subunit_6
ENSMUSG00000025607	31.1343	27.6891	28.7064	44.0569	45.3006	43.8785	33.4809	33.0008	29.9645	35.5618	35.1887	32.9753	Copg2	coatomer_protein_complex_subunit_gamma_2
ENSMUSG00000002546	24.0896	23.3983	23.0507	43.7346	45.2956	47.1348	19.5608	18.4254	20.2471	28.0691	25.2512	27.5179	Golga2	golgi_autoantigen_golgin_subfamily_a_2
ENSMUSG00000028655	12.2476	10.5017	9.8836	42.6035	45.2901	49.2145	22.8848	21.528	29.7233	49.1789	44.4054	53.6672	Mfsd2a	major_facilitator_superfamily_domain_containing_2A
ENSMUSG00000054405	54.8267	61.4381	64.6321	43.0807	45.229	43.8931	56.318	55.5045	53.246	48.175	51.6028	49.1542	Dnajc8	DnaJ_(Hsp40)_homolog_subfamily_C_member_8
ENSMUSG00000005251	35.2507	34.609	29.2261	48.6833	45.226	42.5635	40.9398	36.6194	38.9431	46.5464	56.6973	50.7738	Ripk4	receptor-interacting_serine-threonine_kinase_4
ENSMUSG00000001100	45.3729	44.7658	49.7261	40.9834	45.2054	47.0633	37.0798	40.807	36.935	36.3871	39.8521	38.0151	Poldip2	polymerase_(DNA-directed)_delta_interacting_protein_2
ENSMUSG00000021585	17.9329	16.7261	15.7266	46.2791	45.1631	48.7666	23.6676	22.4341	26.15	37.1101	33.7351	34.6268	Cast	calpastatin
ENSMUSG00000004865	23.02	24.9968	25.6664	49.0341	45.1567	53.143	19.945	22.2527	21.4475	21.2226	19.0024	23.0451	Srpk1	serine/arginine-rich_protein_specific_kinase_1
ENSMUSG00000052911	39.0621	28.2351	26.7859	44.1869	45.1496	49.5224	45.8474	42.6207	48.5055	33.407	26.6807	35.4821	Lamb2	laminin_beta_2
ENSMUSG00000042625	46.0614	48.534	47.5184	47.9921	45.0444	52.5798	38.4446	40.2861	44.2961	43.6458	37.264	44.1621	Safb2	scaffold_attachment_factor_B2
ENSMUSG00000020994	29.1601	45.9444	41.8461	50.2618	45.0165	53.0107	29.8574	32.8261	37.5726	38.7604	33.8939	42.5428	Pnn	pinin
ENSMUSG00000032803	71.5985	76.7581	76.6511	44.9631	44.9186	44.2324	64.2789	64.6492	60.4554	49.8649	55.7118	54.0431	Cdv3	carnitine_deficiency-associated_gene_expressed_in_ventricle_3
ENSMUSG00000022185	52.3965	61.1424	61.7761	46.1808	44.8221	47.7948	47.7428	46.9241	56.1067	43.117	39.6371	43.0288	Acin1	apoptotic_chromatin_condensation_inducer_1
ENSMUSG00000003346	75.5646	66.9343	68.0944	45.5939	44.8065	45.9062	53.1635	51.3102	51.1409	40.3112	45.5121	41.1752	Abhd17a	abhydrolase_domain_containing_17A
ENSMUSG00000024925	53.6679	67.2187	62.9505	45.8409	44.7908	50.0464	56.9483	55.7675	62.6158	48.2936	45.8702	49.0138	Rnaseh2c	ribonuclease_H2_subunit_C
ENSMUSG00000027775	27.1891	29.314	30.4809	42.8748	44.7702	43.0629	22.8933	23.5496	25.162	25.6555	25.7734	26.8205	Mfsd1	major_facilitator_superfamily_domain_containing_1
ENSMUSG00000015176	50.3592	54.7335	57.5246	46.0516	44.7374	44.7337	38.8332	41.647	44.0094	45.793	49.5325	51.6077	Nolc1	nucleolar_and_coiled-body_phosphoprotein_1
ENSMUSG00000041133	66.492	58.3032	58.6348	41.4131	44.7143	40.9587	56.8548	54.9738	52.5303	39.7183	38.954	41.0358	Smc1a	structural_maintenance_of_chromosomes_1A
ENSMUSG00000039985	17.7403	26.735	23.1356	37.2943	44.6471	42.6383	21.7737	23.2742	20.0224	23.1455	20.905	26.4002	Fam60a	family_with_sequence_similarity_60_member_A
ENSMUSG00000001300	35.6304	46.6391	40.1077	42.923	44.6327	39.0049	21.6658	22.1026	21.3708	31.9004	32.2823	37.1324	Efnb2	ephrin_B2
ENSMUSG00000044594	0.515828	0.465659	0.751688	38.3654	44.5991	45.5787	0.0735736	0.267827	0.719132	0.808844	1.05003	0.946323	Serpinb3a	serine_(or_cysteine)_peptidase_inhibitor_clade_B_(ovalbumin)_member_3A
ENSMUSG00000021670	16.1413	19.7187	14.9064	43.0255	44.5912	38.6452	13.4946	12.1941	20.6619	28.7464	28.4817	29.968	Hmgcr	3-hydroxy-3-methylglutaryl-Coenzyme_A_reductase
ENSMUSG00000027108	32.3741	40.9073	45.1168	44.984	44.5893	44.7437	37.2089	45.5188	38.7367	55.3095	60.5763	55.5185	Ola1	Obg-like_ATPase_1
ENSMUSG00000001383	56.433	47.6656	55.2351	39.0616	44.5193	45.7742	44.4473	46.2768	39.6624	31.0377	32.3166	28.3243	Zmat2	zinc_finger_matrin_type_2
ENSMUSG00000025068	42.7904	42.193	52.5848	46.6543	44.5185	37.8698	56.1998	48.5537	55.5097	156.351	184.033	176.304	Gsto1	glutathione_S-transferase_omega_1
ENSMUSG00000026526	44.3148	47.7601	44.079	41.6299	44.4592	42.5853	34.0627	34.9695	36.258	33.8786	37.6236	40.4391	Fh1	fumarate_hydratase_1
ENSMUSG00000014959	39.9778	36.8462	38.2904	41.8565	44.4469	44.2736	40.9954	37.4363	35.3402	41.3478	42.9734	41.6719	Gorasp2	golgi_reassembly_stacking_protein_2
ENSMUSG00000024560	34.9094	39.4601	41.0485	46.9414	44.4308	52.0758	35.7841	36.6714	38.2695	32.764	29.1009	35.5055	Cxxc1	CXXC_finger_1_(PHD_domain)
ENSMUSG00000031400	17.4962	15.471	17.4296	44.4579	44.3925	44.5324	16.9735	15.4681	15.1818	32.4389	35.4529	35.5321	G6pdx	glucose-6-phosphate_dehydrogenase_X-linked
ENSMUSG00000050390	38.6901	38.7905	38.9517	45.5093	44.3915	46.2689	41.905	40.5234	41.8472	30.7125	28.7199	29.5259	C77080	expressed_sequence_C77080
ENSMUSG00000040562	66.881	75.9015	72.7226	41.0269	44.3869	41.4123	93.9474	86.598	91.9294	60.8651	71.4096	52.062	Gstm2	glutathione_S-transferase_mu_2
ENSMUSG00000024098	55.634	66.1889	61.4611	44.9378	44.3729	40.9564	64.7597	61.6708	57.4953	41.4164	45.062	42.8666	Twsg1	twisted_gastrulation_homolog_1_(Drosophila)
ENSMUSG00000054693	23.3647	26.3792	25.8169	44.1735	44.3672	43.0508	31.5814	30.04	31.5941	33.7079	33.6238	34.4236	Adam10	a_disintegrin_and_metallopeptidase_domain_10
ENSMUSG00000023106	42.2301	42.2502	49.262	42.5742	44.3657	43.9482	33.9131	36.3199	34.3514	33.3752	37.0933	34.8478	Denr	density-regulated_protein
ENSMUSG00000030533	47.3326	40.6065	44.7229	42.905	44.3375	48.762	45.4897	42.8834	49.0611	46.335	47.0373	47.5025	Unc45a	unc-45_homolog_A_(C._elegans)
ENSMUSG00000075700	30.4259	39.4269	43.7155	42.4237	44.2787	43.3431	39.8556	45.7281	47.1311	48.4656	51.3671	51.2471	Selt	selenoprotein_T
ENSMUSG00000068220	135.572	88.6382	154.246	59.6694	44.2759	66.3813	46.0865	41.613	54.2305	28.0335	18.6857	12.5198	Lgals1	lectin_galactose_binding_soluble_1
ENSMUSG00000002767	69.0217	73.9815	71.1133	42.6334	44.2524	48.0195	60.5002	63.2398	67.7979	42.3806	40.3474	45.2032	Mrpl2	mitochondrial_ribosomal_protein_L2
ENSMUSG00000028953	40.6137	42.1536	43.5215	45.0001	44.2259	44.9483	39.7452	39.9495	39.2104	39.1543	40.0474	39.9596	Abcf2	ATP-binding_cassette_sub-family_F_(GCN20)_member_2
ENSMUSG00000027239	129.982	219.487	211.428	34.0511	44.0704	48.3461	9.57434	7.5594	8.88667	4.63808	3.47231	2.81203	Mdk	midkine
ENSMUSG00000022774	36.1197	45.918	52.3812	38.4263	44.0344	44.2862	37.6953	39.3483	33.1601	35.3511	38.8966	32.4136	Ncbp2	nuclear_cap_binding_protein_subunit_2
ENSMUSG00000027864	46.7904	43.5354	42.5031	46.2393	44.0026	46.0386	52.0418	46.2002	54.5032	73.444	66.6736	77.3708	Ptgfrn	prostaglandin_F2_receptor_negative_regulator
ENSMUSG00000025357	32.6256	30.044	29.7061	42.8497	43.9854	44.2289	39.9561	40.9045	45.1725	60.5198	57.4761	61.3108	Dgka	diacylglycerol_kinase_alpha
ENSMUSG00000036565	111.22	96.4815	101.489	39.7729	43.9592	47.8412	79.7414	71.7025	77.2654	18.3164	16.8164	16.9789	Ttyh3	tweety_homolog_3_(Drosophila)
ENSMUSG00000073411	35.2351	24.703	21.0728	46.7381	43.9188	66.9747	36.5544	31.6374	53.4279	61.3302	41.4679	52.5358	H2-D1	histocompatibility_2_D_region_locus_1
ENSMUSG00000021243	45.3904	41.4617	50.8067	45.0905	43.9174	51.5585	41.215	42.6033	41.187	42.5921	47.8304	43.4601	Fcf1	FCF1_small_subunit_(SSU)_processome_component_homolog_(S._cerevisiae)
ENSMUSG00000048832	21.7629	23.3061	22.0394	42.2251	43.8802	48.5924	21.4853	20.1873	19.7591	32.2	28.4521	30.8725	Vps37c	vacuolar_protein_sorting_37C_(yeast)
ENSMUSG00000020484	25.3888	28.0905	22.45	43.3989	43.8639	51.0371	24.8567	23.5846	26.6378	38.6324	39.4167	42.1005	Xbp1	X-box_binding_protein_1
ENSMUSG00000037400	14.5971	17.8541	16.2561	45.1655	43.8451	39.9579	18.2646	18.7734	20.4939	32.5935	32.4047	35.7899	Atp11b	ATPase_class_VI_type_11B
ENSMUSG00000019996	40.4911	46.1067	47.2469	42.8603	43.8091	42.786	34.6385	37.0531	38.6536	31.1262	30.102	31.1937	Map7	microtubule-associated_protein_7
ENSMUSG00000061928	4.71424	3.72057	4.2869	43.1099	43.8089	40.0669	9.92993	9.54008	12.599	40.1271	37.5973	47.2994	Dsg1b	desmoglein_1_beta
ENSMUSG00000004667	60.3436	65.9247	66.3006	43.338	43.7758	44.0326	39.1511	42.7921	43.1867	37.3103	40.3279	41.4468	Polr2e	polymerase_(RNA)_II_(DNA_directed)_polypeptide_E
ENSMUSG00000028455	46.9147	54.5894	53.2299	44.8661	43.7656	43.0265	38.4577	38.5596	42.8946	41.3612	43.955	43.7389	Stoml2	stomatin_(Epb7.2)-like_2
ENSMUSG00000092203	24.5333	34.6851	27.5968	38.0482	43.7501	38.2973	28.9253	32.011	27.5408	31.9434	24.8351	28.4505	1110038B12Rik	RIKEN_cDNA_1110038B12_gene
ENSMUSG00000032575	61.2251	68.7298	61.3745	42.5107	43.7444	47.7121	46.3072	45.6928	57.2387	46.1806	46.4081	47.1216	Manf	mesencephalic_astrocyte-derived_neurotrophic_factor
ENSMUSG00000091478	32.317	18.9663	21.1104	51.6336	43.7411	43.0292	18.5599	16.027	22.4495	19.4967	8.90466	25.4885	Gm10039	predicted_pseudogene_10039
ENSMUSG00000097188	17.7768	36.4683	27.1329	45.3089	43.7275	45.8971	18.5717	21.3538	24.2168	35.0686	27.508	49.6731	Snhg1	small_nucleolar_RNA_host_gene_1
ENSMUSG00000027422	43.5053	32.5835	35.4202	44.3314	43.7265	42.5658	26.9214	29.0132	31.8556	34.5197	30.7568	35.9891	Rrbp1	ribosome_binding_protein_1
ENSMUSG00000018143	27.2237	29.392	20.905	49.105	43.6932	43.5859	28.5818	26.7457	34.8783	37.6555	39.4298	39.8812	Mafk	v-maf_musculoaponeurotic_fibrosarcoma_oncogene_family_protein_K_(avian)
ENSMUSG00000058546	284.531	146.54	212.448	42.8632	43.6301	39.6773	49.1892	47.9629	178.236	30.7697	39.8873	36.2403	Rpl23a	ribosomal_protein_L23A
ENSMUSG00000033701	51.0452	48.7534	54.5239	42.1076	43.6248	41.8664	47.2592	46.6272	44.4702	36.3416	41.7085	40.5927	Acbd6	acyl-Coenzyme_A_binding_domain_containing_6
ENSMUSG00000033335	31.0499	29.7186	29.7929	46.0701	43.6185	46.0578	31.9309	29.6557	31.4382	39.5855	37.2429	39.4835	Dnm2	dynamin_2
ENSMUSG00000025858	44.8578	46.6234	47.5843	39.4979	43.6071	40.7581	42.0113	39.687	37.8858	32.0514	30.2871	36.9133	Get4	golgi_to_ER_traffic_protein_4_homolog_(S._cerevisiae)
ENSMUSG00000003099	67.0542	72.0266	67.6601	51.3559	43.5464	45.4489	68.9326	65.2761	69.4048	70.561	71.2499	68.834	Ppp5c	protein_phosphatase_5_catalytic_subunit
ENSMUSG00000041126	100.19	104.401	102.721	37.9983	43.5299	41.7283	77.8294	76.8341	71.3978	25.7387	24.1162	25.3786	H2afv	H2A_histone_family_member_V
ENSMUSG00000021215	125.795	134.078	144.256	47.6002	43.501	42.5828	168.782	166.171	148.665	133.477	128.089	124.671	Net1	neuroepithelial_cell_transforming_gene_1
ENSMUSG00000026511	34.876	40.5604	37.7851	46.0191	43.4698	46.7051	30.1969	30.1526	35.7594	29.1618	46.0414	30.5786	Srp9	signal_recognition_particle_9
ENSMUSG00000086784	25.3861	41.1004	40.1528	44.9402	43.4077	36.8254	22.1654	25.4861	17.8176	29.877	31.7429	29.4021	Isoc2a	isochorismatase_domain_containing_2a
ENSMUSG00000021537	28.044	52.6488	62.2682	43.4944	43.384	45.807	38.9741	44.9712	48.6055	44.848	46.7481	39.0806	Cetn3	centrin_3
ENSMUSG00000027506	17.9192	14.6376	15.0023	41.4278	43.3801	39.8414	22.4417	22.0879	23.0445	26.5031	29.5248	27.2157	Tpd52	tumor_protein_D52
ENSMUSG00000003199	80.9035	61.0284	64.669	44.51	43.3608	43.702	72.3123	72.0466	63.3932	42.4569	42.9404	38.7842	Mpnd	MPN_domain_containing
ENSMUSG00000024208	66.4799	79.3629	80.1347	46.3683	43.3475	51.5742	49.9529	62.8423	71.2998	53.1928	53.6118	55.5895	Uqcc2	ubiquinol-cytochrome_c_reductase_complex_assembly_factor_2
ENSMUSG00000022382	104.839	104.521	96.0001	43.0597	43.3425	47.8976	85.1481	83.01	83.4712	70.1549	61.3483	62.7939	Wnt7b	wingless-type_MMTV_integration_site_family_member_7B
ENSMUSG00000032504	26.7833	24.3104	24.5126	44.6303	43.3137	42.906	25.5162	24.895	25.5981	33.4852	35.7735	33.9445	Pdcd6ip	programmed_cell_death_6_interacting_protein
ENSMUSG00000026496	118.095	106.353	121.082	43.1331	43.2947	43.2681	85.234	84.8971	81.2042	57.6174	56.8676	52.6959	Parp1	poly_(ADP-ribose)_polymerase_family_member_1
ENSMUSG00000001910	69.9913	57.4742	64.3323	43.1391	43.2773	42.162	54.827	54.744	52.3976	36.7197	34.2126	35.3788	Nacc1	nucleus_accumbens_associated_1_BEN_and_BTB_(POZ)_domain_containing
ENSMUSG00000059447	19.4848	17.5641	17.2637	43.3193	43.1956	42.7054	14.6316	14.9487	15.7598	25.3364	26.1963	28.6252	Hadhb	hydroxyacyl-Coenzyme_A_dehydrogenase/3-ketoacyl-Coenzyme_A_thiolase/enoyl-Coenzyme_A_hydratase_(trifunctional_protein)_beta_subunit
ENSMUSG00000021288	50.0935	47.9848	46.0379	43.9049	43.1937	48.2219	46.9331	43.0351	44.3293	48.5858	47.7589	50.4892	Klc1	kinesin_light_chain_1
ENSMUSG00000020180	51.9407	70.2687	78.0857	41.0682	43.1805	40.768	53.1129	50.6332	57.711	41.0601	43.5287	43.0346	Snrpd3	small_nuclear_ribonucleoprotein_D3
ENSMUSG00000027014	8.84437	23.3272	19.515	60.718	43.1567	42.8476	8.35572	9.8751	29.0661	65.6863	97.8214	33.5082	Cwc22	CWC22_spliceosome-associated_protein_homolog_(S._cerevisiae)
ENSMUSG00000020929	71.9846	66.5604	74.0038	40.2472	43.1457	40.6813	54.6983	53.0758	57.0948	41.3109	42.9788	42.0718	Eftud2	elongation_factor_Tu_GTP_binding_domain_containing_2
ENSMUSG00000018559	44.6028	48.0914	43.3792	40.462	43.123	44.3079	48.0078	43.2498	45.3395	38.1929	41.5986	39.2919	Ctdnep1	CTD_nuclear_envelope_phosphatase_1
ENSMUSG00000032667	14.7257	15.4649	13.3494	36.8641	43.1172	42.0677	16.9785	16.2699	17.9403	28.4479	31.9701	33.6498	Pon2	paraoxonase_2
ENSMUSG00000028419	23.5685	27.3969	28.0584	43.4052	43.0224	42.1631	25.1613	29.8878	24.481	34.2064	35.6314	31.4212	Chmp5	charged_multivesicular_body_protein_5
ENSMUSG00000026276	46.332	51.3913	57.5328	42.4973	43.0208	42.3959	53.4391	56.8848	52.2105	50.8907	51.2739	45.3679	2020-09-02	septin_2
ENSMUSG00000033557	43.0008	36.8577	36.6076	43.6113	43.0153	41.2548	38.6464	37.7023	36.6667	28.7049	28.6569	29.5926	Fam20b	family_with_sequence_similarity_20_member_B
ENSMUSG00000036707	33.0465	37.5587	43.5248	39.7561	42.995	39.651	40.3771	40.0759	36.0918	44.6357	46.873	43.9566	Cab39	calcium_binding_protein_39
ENSMUSG00000066232	48.0448	57.0892	54.4992	43.7606	42.9296	38.5782	52.5906	52.351	53.8356	54.504	58.2112	53.5278	Ipo7	importin_7
ENSMUSG00000006676	46.966	48.8423	47.4568	43.6505	42.8482	45.391	41.5835	37.4024	41.0453	36.0851	33.694	39.1904	Usp19	ubiquitin_specific_peptidase_19
ENSMUSG00000021484	54.7241	49.116	46.5058	41.9028	42.8003	43.6942	48.2189	47.4054	48.5437	47.8161	48.7753	50.2132	Lman2	lectin_mannose-binding_2
ENSMUSG00000024927	50.0536	46.5385	42.1081	45.9158	42.7919	42.4162	47.0291	45.0639	57.5634	52.4569	57.2214	48.7496	Rela	v-rel_reticuloendotheliosis_viral_oncogene_homolog_A_(avian)
ENSMUSG00000028138	72.5798	74.3603	74.5268	44.3105	42.772	44.5072	65.8117	65.436	62.0846	58.6606	68.0005	58.3652	Adh5	alcohol_dehydrogenase_5_(class_III)_chi_polypeptide
ENSMUSG00000020530	24.3796	24.7808	24.3567	44.1887	42.769	39.7242	20.7749	20.4446	20.8601	31.2179	31.0022	31.4702	Ggnbp2	gametogenetin_binding_protein_2
ENSMUSG00000021264	59.5446	66.9573	70.0472	44.3477	42.7473	40.9683	50.4905	46.1114	50.8361	41.4045	45.5439	45.4	Yy1	YY1_transcription_factor
ENSMUSG00000060376	34.6788	32.3834	29.6478	41.0251	42.7235	43.3925	24.7162	25.2501	19.8437	19.1299	20.7582	23.4899	Bckdha	branched_chain_ketoacid_dehydrogenase_E1_alpha_polypeptide
ENSMUSG00000032383	64.8263	58.4547	59.6183	43.6862	42.6158	46.9394	53.5524	51.0712	57.7643	36.8005	34.096	35.8775	Ppib	peptidylprolyl_isomerase_B
ENSMUSG00000074247	46.1172	50.0083	46.6145	40.4597	42.6015	45.1049	41.5172	39.9881	40.9058	36.8446	39.7932	36.3667	Dda1	DET1_and_DDB1_associated_1
ENSMUSG00000026655	15.0088	18.8964	17.8615	38.8116	42.5992	41.4731	9.78137	10.0234	8.81497	7.71288	9.19544	10.0713	Fam107b	family_with_sequence_similarity_107_member_B
ENSMUSG00000048058	6.89607	6.77896	6.71136	41.7933	42.5922	42.0984	10.3548	11.0726	11.0998	19.6961	18.3702	18.1581	Ldlrad3	low_density_lipoprotein_receptor_class_A_domain_containing_3
ENSMUSG00000020290	25.0525	46.7047	46.4544	40.7186	42.5834	43.2179	33.6948	36.7435	35.4854	41.4241	36.8228	42.1136	Xpo1	exportin_1_CRM1_homolog_(yeast)
ENSMUSG00000022565	23.5856	16.9969	16.4019	43.7568	42.5833	40.076	32.2259	28.6046	32.2052	40.7091	37.782	49.7656	Plec	plectin
ENSMUSG00000051375	4.8164	4.36507	4.14157	43.5372	42.5493	43.3612	1.62881	1.42769	2.29772	7.51072	8.6054	8.85192	Pcdh1	protocadherin_1
ENSMUSG00000034919	2.11812	1.34556	1.25159	44.802	42.5003	46.7693	1.18225	1.22006	1.9523	6.07766	6.27683	8.50357	Ttc22	tetratricopeptide_repeat_domain_22
ENSMUSG00000000915	22.0807	18.4428	19.7729	46.5588	42.498	48.0905	16.0712	15.7577	18.0324	27.7369	26.9246	31.3852	Hip1r	huntingtin_interacting_protein_1_related
ENSMUSG00000079562	45.4898	52.0124	53.314	40.6005	42.4461	45.685	45.1067	43.4473	40.95	36.7322	39.0718	35.5405	Maea	macrophage_erythroblast_attacher
ENSMUSG00000018666	96.4549	89.6545	98.8097	38.8285	42.374	47.4777	61.8259	69.6444	64.9887	34.4745	37.5812	32.6559	Cbx1	chromobox_1
ENSMUSG00000084786	39.9701	46.4324	50.6581	41.5342	42.3573	43.3325	42.5145	41.3443	42.4056	37.2109	36.9511	35.7364	Ubl5	ubiquitin-like_5
ENSMUSG00000052459	24.8679	25.3495	23.5599	42.5377	42.3453	37.4742	24.566	23.4761	26.5467	39.0061	46.3604	43.0995	Atp6v1a	ATPase_H+_transporting_lysosomal_V1_subunit_A
ENSMUSG00000035168	11.3458	12.2646	11.594	46.3223	42.2932	40.8647	10.8799	11.0871	11.6129	26.5013	28.8473	31.3047	Tanc1	tetratricopeptide_repeat_ankyrin_repeat_and_coiled-coil_containing_1
ENSMUSG00000029599	55.4997	50.0373	53.1926	42.8121	42.2812	42.8754	49.5787	47.7961	44.5242	42.5086	43.8062	45.3267	Ddx54	DEAD_(Asp-Glu-Ala-Asp)_box_polypeptide_54
ENSMUSG00000030824	48.1033	44.1408	41.6348	45.4804	42.2798	46.0041	37.0492	35.2432	37.8134	31.411	30.4731	33.8067	Nucb1	nucleobindin_1
ENSMUSG00000027944	41.0674	44.4231	42.7897	38.1325	42.2373	40.6549	34.0388	34.2527	42.1776	41.2833	45.5014	44.1019	Hax1	HCLS1_associated_X-1
ENSMUSG00000033059	72.3905	58.3128	59.3317	38.5694	42.2365	37.3948	50.2796	43.7825	42.3201	20.293	19.7009	20.5112	Pygb	brain_glycogen_phosphorylase
ENSMUSG00000002984	49.2601	50.6215	50.8674	42.9718	42.2291	44.449	45.3028	46.1316	43.4661	46.2612	42.8251	49.7712	Tomm40	translocase_of_outer_mitochondrial_membrane_40_homolog_(yeast)
ENSMUSG00000028902	50.6024	48.0115	55.1159	44.2032	42.1542	42.2444	42.0873	39.7253	38.0991	39.6532	39.9629	38.9157	Sf3a3	splicing_factor_3a_subunit_3
ENSMUSG00000041431	47.5151	62.6703	54.7956	38.1952	42.1461	42.451	52.7548	49.2371	44.8211	38.5522	37.3191	41.6572	Ccnb1	cyclin_B1
ENSMUSG00000020315	25.3107	25.7843	23.2774	41.3242	42.1271	35.8157	22.201	20.0055	21.9209	20.8573	20.5349	24.6333	Sptbn1	spectrin_beta_non-erythrocytic_1
ENSMUSG00000028248	29.0691	39.8899	35.3219	41.8119	42.1097	43.7803	27.247	30.5655	31.9893	35.0729	30.9847	32.3136	Pnisr	PNN_interacting_serine/arginine-rich
ENSMUSG00000025153	32.9296	32.1172	34.925	44.2291	42.0958	44.0328	23.4516	19.6868	27.9443	35.41	32.0023	39.3055	Fasn	fatty_acid_synthase
ENSMUSG00000020105	18.3417	15.553	13.7935	43.263	42.0617	38.1159	22.4645	18.8063	21.8386	26.2563	23.9151	28.5285	Lrig3	leucine-rich_repeats_and_immunoglobulin-like_domains_3
ENSMUSG00000022032	1.42585	1.35868	1.73855	37.4533	42.0567	42.8867	0.387454	0.384663	0.368475	0.850138	1.30429	1.18527	Scara5	scavenger_receptor_class_A_member_5_(putative)
ENSMUSG00000022387	33.4944	34.121	32.0571	39.4509	42.0348	37.913	34.4606	30.176	31.7023	31.8	31.4281	33.7817	Brd1	bromodomain_containing_1
ENSMUSG00000042834	62.2422	86.835	87.4636	35.6455	41.9873	45.6204	55.2785	55.111	38.6549	18.8395	17.7619	13.7236	Nrep	neuronal_regeneration_related_protein
ENSMUSG00000051431	3.66509	3.53125	3.14769	42.426	41.9297	46.7659	5.22372	5.5148	5.00516	21.5122	19.855	24.4151	Gpr87	G_protein-coupled_receptor_87
ENSMUSG00000028236	2.82622	0.726226	1.20894	55.2477	41.8875	44.8717	4.58972	4.6421	7.63765	39.59	36.2874	46.7108	Sdr16c5	short_chain_dehydrogenase/reductase_family_16C_member_5
ENSMUSG00000063787	50.6494	61.5431	60.7657	39.6731	41.8834	49.1917	45.1443	54.4953	41.7572	38.8067	38.5503	39.1749	Chchd1	coiled-coil-helix-coiled-coil-helix_domain_containing_1
ENSMUSG00000024002	52.7699	51.5228	52.1874	41.697	41.8404	41.644	45.5341	43.1396	51.7332	39.81	42.4838	43.2238	Brd4	bromodomain_containing_4
ENSMUSG00000002064	35.7953	32.6218	28.6907	43.4106	41.8057	43.8115	26.0687	25.8188	26.7912	27.0667	25.0823	24.9462	Sdf2	stromal_cell_derived_factor_2
ENSMUSG00000021947	21.2419	22.53	22.2388	40.2185	41.7995	45.0682	11.9471	9.37135	9.88179	8.57825	10.8212	7.79206	Cryl1	crystallin_lambda_1
ENSMUSG00000015087	45.3428	42.5956	43.1956	42.7841	41.7624	45.4323	37.4017	36.5873	35.1525	36.2117	34.2546	36.2077	Rabl6	RAB_member_RAS_oncogene_family-like_6
ENSMUSG00000002010	66.8597	54.059	55.9348	40.8831	41.697	38.9814	52.4318	50.4233	49.4898	36.2472	41.1135	37.8838	Idh3g	isocitrate_dehydrogenase_3_(NAD+)_gamma
ENSMUSG00000056820	50.8974	51.4094	51.9698	41.0467	41.6789	42.8537	49.9322	49.3416	43.4619	43.8631	48.8519	42.4456	Tsnax	translin-associated_factor_X
ENSMUSG00000020775	46.1007	41.3747	45.0214	40.3328	41.5289	42.2746	36.8295	37.4029	40.3248	38.5033	36.1667	38.4981	Mrpl38	mitochondrial_ribosomal_protein_L38
ENSMUSG00000038374	44.6736	54.2214	59.5072	40.3799	41.5163	41.6506	44.9935	44.5179	45.4723	39.8881	42.7181	39.8568	Rbm8a	RNA_binding_motif_protein_8a
ENSMUSG00000016541	91.2449	91.9412	97.5234	40.3465	41.5153	38.7301	65.2714	67.2249	60.8967	43.1858	43.2355	39.2796	Atxn10	ataxin_10
ENSMUSG00000034107	1.61176	1.0835	0.827819	47.2946	41.5145	45.4936	3.23103	1.9999	5.29862	37.1781	28.9692	43.585	Ano7	anoctamin_7
ENSMUSG00000004056	48.0269	45.5985	44.5306	42.0762	41.4881	38.6226	40.6478	37.152	33.9858	35.8126	36.1871	36.0207	Akt2	thymoma_viral_proto-oncogene_2
ENSMUSG00000099597	11.9096	10.8422	10.0612	38.692	41.4743	42.0752	13.6386	16.8764	11.9563	30.7685	29.1988	34.0313	RP24-69I6.1	predicted_gene_28933
ENSMUSG00000021576	36.1314	41.4968	41.6166	40.0214	41.4146	42.9098	37.0185	37.0884	37.977	39.8813	44.6129	40.0026	Pdcd6	programmed_cell_death_6
ENSMUSG00000017188	49.64	53.6401	56.1794	39.1423	41.4041	41.4434	35.8285	44.3407	41.6558	36.063	36.3038	32.0682	Coa3	cytochrome_C_oxidase_assembly_factor_3
ENSMUSG00000030352	53.4015	41.5142	40.2962	39.4387	41.3997	42.3574	51.1004	46.4461	44.0739	46.5043	45.9183	48.171	Tspan9	tetraspanin_9
ENSMUSG00000048100	13.0701	17.7381	16.0961	41.6173	41.3685	41.8597	21.6456	22.8298	24.1106	36.0805	37.009	34.0328	Taf13	TAF13_RNA_polymerase_II_TATA_box_binding_protein_(TBP)-associated_factor
ENSMUSG00000031924	35.992	36.6292	41.5577	42.2368	41.3576	37.1949	29.145	27.1623	29.7136	31.4895	32.952	31.9295	Cyb5b	cytochrome_b5_type_B
ENSMUSG00000000441	37.4083	39.5012	36.8267	39.4949	41.3391	40.5277	37.8173	38.6682	35.8071	36.9724	34.2432	36.1754	Raf1	v-raf-leukemia_viral_oncogene_1
ENSMUSG00000060601	37.9747	50.2325	42.5151	44.5822	41.2719	46.6588	45.2748	40.4104	44.595	49.6661	42.4957	50.8202	Nr1h2	nuclear_receptor_subfamily_1_group_H_member_2
ENSMUSG00000062963	36.1919	35.7866	39.1207	41.0892	41.2579	40.842	39.019	39.4201	39.0415	32.7867	34.1186	32.9097	Ufc1	ubiquitin-fold_modifier_conjugating_enzyme_1
ENSMUSG00000030512	50.0377	52.1281	54.5206	42.122	41.2255	41.0067	42.0633	43.8825	45.4267	39.5516	42.2093	41.1384	Snrpa1	small_nuclear_ribonucleoprotein_polypeptide_A'
ENSMUSG00000039016	45.7337	54.6332	52.7608	40.7466	41.2123	35.2642	33.9248	37.3479	45.2734	29.3585	30.3216	32.5808	Timm8b	translocase_of_inner_mitochondrial_membrane_8B
ENSMUSG00000020108	63.8966	54.1463	45.8006	50.5268	41.2062	38.9581	70.2874	75.9845	105.23	44.6546	43.134	37.6665	Ddit4	DNA-damage-inducible_transcript_4
ENSMUSG00000026977	9.03151	17.6252	17.2974	38.4542	41.1709	40.141	12.2338	12.9628	13.0652	22.7254	21.7923	24.8827	2020-03-07	membrane-associated_ring_finger_(C3HC4)_7
ENSMUSG00000031995	45.2766	36.8041	35.1078	40.0906	41.1485	43.5194	40.705	38.197	38.8069	31.5466	29.4033	34.8412	St14	suppression_of_tumorigenicity_14_(colon_carcinoma)
ENSMUSG00000023991	77.602	75.487	83.2454	38.1929	41.1401	43.1867	52.6352	51.7728	57.4252	35.5263	31.5287	36.6872	Foxp4	forkhead_box_P4
ENSMUSG00000023832	36.3577	37.7556	45.3042	38.9815	41.1379	42.7638	29.8414	25.1037	29.6374	29.2976	25.9566	26.9134	Acat2	acetyl-Coenzyme_A_acetyltransferase_2
ENSMUSG00000000296	4.75565	4.36624	3.96461	34.7718	41.11	38.9173	2.03823	1.71223	1.39762	4.73344	6.42808	6.21122	Tpd52l1	tumor_protein_D52-like_1
ENSMUSG00000045896	24.2106	25.3645	25.395	35.7736	41.1083	38.4531	23.2172	21.4553	20.4795	21.2625	23.3009	20.1608	Paip2b	poly(A)_binding_protein_interacting_protein_2B
ENSMUSG00000005514	36.9401	36.2175	27.814	44.0011	41.1045	42.9454	38.0718	34.0119	33.6416	65.3482	55.2817	65.796	Por	P450_(cytochrome)_oxidoreductase
ENSMUSG00000015889	45.6416	43.5727	46.392	43.112	41.0859	39.9952	35.0375	33.4297	36.3144	38.3712	37.9739	34.5293	Lta4h	leukotriene_A4_hydrolase
ENSMUSG00000025372	23.4676	18.4903	17.7111	46.0524	41.0663	44.8684	22.9252	23.9025	24.0969	43.7909	40.7354	51.5735	Baiap2	brain-specific_angiogenesis_inhibitor_1-associated_protein_2
ENSMUSG00000038354	1.39963	0.696886	1.01827	44.8722	41.0658	45.2025	1.46936	1.83196	2.8724	12.3248	12.5616	13.7276	Ankrd35	ankyrin_repeat_domain_35
ENSMUSG00000034616	13.3793	15.8596	11.5763	44.9702	41.0556	48.4416	15.0784	14.6381	14.3974	28.6352	26.2351	30.1564	Ssh3	slingshot_homolog_3_(Drosophila)
ENSMUSG00000021811	98.2091	100.546	116.224	39.8992	41.0511	41.5038	80.0197	89.6731	78.5139	31.4249	37.8304	32.9919	Dnajc9	DnaJ_(Hsp40)_homolog_subfamily_C_member_9
ENSMUSG00000038539	32.4467	36.5523	35.8388	41.0478	41.0389	41.9204	29.5073	24.9483	32.7354	46.4821	50.5243	49.9471	Atf5	activating_transcription_factor_5
ENSMUSG00000022895	51.7032	51.1315	42.939	46.105	40.9689	36.0363	112.653	103.77	119.315	93.8503	105.677	91.3783	Ets2	E26_avian_leukemia_oncogene_2_3'_domain
ENSMUSG00000051495	31.2023	29.5593	29.7642	39.651	40.9364	38.3435	60.7755	48.1088	54.296	48.7702	44.6265	45.3374	Irf2bp2	interferon_regulatory_factor_2_binding_protein_2
ENSMUSG00000029840	35.7624	43.2216	49.778	40.5803	40.9318	39.0452	40.9738	42.0632	42.4575	41.7559	43.0337	38.2874	Mtpn	myotrophin
ENSMUSG00000040857	103.447	104.959	93.6897	41.9652	40.9221	40.294	97.7657	90.0282	103.65	48.4561	49.326	48.5646	Erf	Ets2_repressor_factor
ENSMUSG00000022010	50.7115	50.5611	43.6645	40.3237	40.9193	34.8974	96.9838	93.1134	95.4927	83.1217	86.2549	70.2376	Tsc22d1	TSC22_domain_family_member_1
ENSMUSG00000028140	50.2982	42.3393	44.431	37.235	40.9055	39.0436	35.6776	36.8965	34.7881	33.73	37.7035	35.0339	Mrpl9	mitochondrial_ribosomal_protein_L9
ENSMUSG00000003531	38.8836	31.78	34.7463	44.1374	40.8964	43.2143	62.1918	54.4963	48.8062	45.4822	49.5067	43.3008	Dgcr6	DiGeorge_syndrome_critical_region_gene_6
ENSMUSG00000029055	21.5013	15.3272	17.3284	43.7777	40.8835	40.6578	33.8399	35.0212	40.2637	41.9304	32.3188	40.4064	Plch2	phospholipase_C_eta_2
ENSMUSG00000036372	57.6555	59.0243	62.4099	36.8473	40.8689	42.7513	36.903	45.9022	53.0492	32.5175	32.5056	37.6039	Tmem258	transmembrane_protein_258
ENSMUSG00000025869	39.2724	46.4678	51.548	37.0016	40.8405	44.3246	30.6571	30.0544	30.7569	37.1091	43.0339	39.7811	Nop16	NOP16_nucleolar_protein
ENSMUSG00000003299	36.0063	35.2886	38.4195	45.033	40.8367	43.8539	35.463	36.5582	37.8238	45.2595	45.2889	42.8695	Mrpl4	mitochondrial_ribosomal_protein_L4
ENSMUSG00000020075	44.4912	43.5001	49.9151	40.2024	40.7804	38.1794	43.7429	44.1099	43.0817	50.9924	56.384	55.1426	Ddx21	DEAD_(Asp-Glu-Ala-Asp)_box_polypeptide_21
ENSMUSG00000028868	50.342	47.3095	47.8792	40.5258	40.7599	40.1733	53.4612	48.2314	51.5802	46.2615	47.8739	47.723	Wasf2	WAS_protein_family_member_2
ENSMUSG00000003458	32.1254	32.8632	29.4071	42.0171	40.7586	45.2203	38.0699	34.5393	35.367	37.4637	30.3367	36.8859	Ncstn	nicastrin
ENSMUSG00000070934	37.4301	44.2664	47.5403	44.1763	40.7503	41.158	34.1558	33.471	30.6729	31.397	36.7963	28.3616	Rraga	Ras-related_GTP_binding_A
ENSMUSG00000071014	76.8835	83.3098	86.9261	45.8177	40.699	40.7849	52.4505	54.826	75.5213	35.1022	41.5346	41.7186	Ndufb6	NADH_dehydrogenase_(ubiquinone)_1_beta_subcomplex_6
ENSMUSG00000040746	25.4699	25.7789	24.5577	40.9082	40.6844	45.1617	24.6854	26.1905	23.4863	30.7759	27.629	29.6161	Rnf167	ring_finger_protein_167
ENSMUSG00000063015	101.451	90.1259	92.7017	37.9671	40.6691	39.8379	102.994	106.275	95.9915	42.7765	41.4175	35.7746	Ccni	cyclin_I
ENSMUSG00000036199	74.1628	62.1053	57.3517	46.1085	40.6529	48.7519	39.3142	48.0114	44.3504	41.9639	36.9909	39.878	Ndufa13	NADH_dehydrogenase_(ubiquinone)_1_alpha_subcomplex_13
ENSMUSG00000026775	20.2946	27.5923	27.2182	38.6701	40.6294	39.8218	24.0894	25.927	28.1856	28.7479	26.7535	29.4753	Yme1l1	YME1-like_1_(S._cerevisiae)
ENSMUSG00000021242	51.6147	38.5679	39.7541	39.5405	40.6167	41.7157	85.7339	90.7045	86.6118	48.4963	41.6989	38.0793	Npc2	Niemann-Pick_type_C2
ENSMUSG00000024197	47.0367	42.5111	45.5452	41.0215	40.5988	38.4806	41.7907	45.2898	41.2469	42.8341	43.4769	38.7699	Plin3	perilipin_3
ENSMUSG00000050732	25.1896	27.8992	28.0335	41.4475	40.5603	41.1982	22.8312	22.5528	23.659	22.5282	24.3332	23.2615	Vamp8	vesicle-associated_membrane_protein_8
ENSMUSG00000042626	32.5731	36.1452	34.2683	41.2098	40.5598	38.5981	38.1161	36.3973	33.2794	34.022	32.5299	35.2207	Shc1	src_homology_2_domain-containing_transforming_protein_C1
ENSMUSG00000014195	40.1681	43.9958	42.943	40.7151	40.4762	43.1609	31.9884	33.2308	34.2798	29.9355	30.5519	32.547	Dnajc7	DnaJ_(Hsp40)_homolog_subfamily_C_member_7
ENSMUSG00000033106	22.6394	29.7625	24.3214	41.3504	40.3998	43.93	23.1865	24.9853	27.1348	38.7976	38.1953	36.8936	Slc7a6os	solute_carrier_family_7_member_6_opposite_strand
ENSMUSG00000006095	39.3531	38.2393	34.3635	42.9671	40.3871	39.9379	27.721	31.059	32.1196	24.2377	27.5207	26.5612	Tbcb	tubulin_folding_cofactor_B
ENSMUSG00000032902	55.6272	67.9393	60.5864	36.3077	40.3547	32.6316	31.2919	28.7227	34.6919	35.2986	33.0057	37.0618	Slc16a1	solute_carrier_family_16_(monocarboxylic_acid_transporters)_member_1
ENSMUSG00000008855	37.4156	28.3814	26.5145	43.6004	40.3283	46.7602	46.3514	41.5084	50.496	49.3997	43.4324	47.9442	Hdac5	histone_deacetylase_5
ENSMUSG00000013483	1.09796	1.00638	1.01333	41.3588	40.2937	47.2496	1.51135	1.20038	1.52895	15.5769	15.2459	18.6862	Card14	caspase_recruitment_domain_family_member_14
ENSMUSG00000024527	30.5658	31.2724	29.9171	39.6231	40.2879	38.3144	29.324	28.6014	29.5912	40.4648	37.9123	41.8253	Afg3l2	AFG3-like_AAA_ATPase_2
ENSMUSG00000041870	37.1656	30.7019	33.8533	41.7686	40.2744	39.985	34.2251	33.2252	34.113	39.5368	40.6605	38.2745	Ankrd13a	ankyrin_repeat_domain_13a
ENSMUSG00000050017	47.374	50.4399	55.9764	39.8547	40.2114	39.8793	51.2558	51.0867	54.7686	50.9813	53.5257	50.9904	Pitpnb	phosphatidylinositol_transfer_protein_beta
ENSMUSG00000021116	29.6824	36.2229	42.3048	37.8535	40.1975	38.3669	28.8551	30.5471	31.4771	34.575	39.3905	35.9286	Eif2s1	eukaryotic_translation_initiation_factor_2_subunit_1_alpha
ENSMUSG00000003863	7.49647	8.6765	7.66321	43.5461	40.1673	44.2707	4.87994	3.84521	5.84759	15.9854	15.2122	19.1017	Ppfia3	protein_tyrosine_phosphatase_receptor_type_f_polypeptide_(PTPRF)_interacting_protein_(liprin)_alpha_3
ENSMUSG00000005417	46.6653	41.0774	40.9049	39.6598	40.163	40.1269	36.7747	34.0756	34.7239	27.8317	27.5551	29.2699	Mprip	myosin_phosphatase_Rho_interacting_protein
ENSMUSG00000019461	39.3698	52.7591	50.7754	39.294	40.0917	44.7377	53.8384	49.5984	48.3567	38.7796	35.148	37.56	Plscr3	phospholipid_scramblase_3
ENSMUSG00000004535	41.5979	36.6659	41.6724	37.5483	40.0685	36.7877	42.1244	45.2791	41.9043	36.8199	37.2203	38.61	Tax1bp1	Tax1_(human_T_cell_leukemia_virus_type_I)_binding_protein_1
ENSMUSG00000027502	36.2292	32.8061	37.7565	37.788	40.0466	43.6124	31.3925	33.7803	29.3366	29.2225	30.743	30.0306	Rtfdc1	replication_termination_factor_2_domain_containing_1
ENSMUSG00000023307	35.0233	38.9474	36.7342	39.3832	40.0439	39.8661	40.1277	40.0362	36.979	35.8418	35.3971	34.8639	2020-03-05	membrane-associated_ring_finger_(C3HC4)_5
ENSMUSG00000030849	149.52	182.645	151.232	39.7658	40.0092	34.7188	159.744	155.495	154.35	55.9843	47.9272	49.0131	Fgfr2	fibroblast_growth_factor_receptor_2
ENSMUSG00000001891	14.5074	19.9628	21.0861	38.3831	39.9317	37.687	27.4391	29.6525	28.8144	54.2479	53.8906	49.1777	Ugp2	UDP-glucose_pyrophosphorylase_2
ENSMUSG00000068290	38.439	34.3941	32.3369	37.4185	39.9144	40.1518	38.5744	45.5927	37.9799	34.3173	29.8122	32.733	Ddrgk1	DDRGK_domain_containing_1
ENSMUSG00000023348	98.3077	96.0104	94.8184	39.4951	39.8919	41.8112	78.2856	73.7326	76.3071	46.7892	48.6179	43.6685	Trip6	thyroid_hormone_receptor_interactor_6
ENSMUSG00000061665	30.6866	40.644	43.559	39.9317	39.8766	36.6887	32.2827	35.1917	32.9021	35.5646	35.5165	35.3612	Cd2ap	CD2-associated_protein
ENSMUSG00000020456	47.2954	41.432	41.5427	41.381	39.8523	41.7867	44.4854	42.6836	45.177	57.3212	57.6544	60.3633	Ogdh	oxoglutarate_(alpha-ketoglutarate)_dehydrogenase_(lipoamide)
ENSMUSG00000029432	38.8583	39.3098	44.9011	39.9295	39.8229	39.5498	31.9042	30.89	34.2658	31.1642	32.2655	33.3659	Gbas	glioblastoma_amplified_sequence
ENSMUSG00000063200	45.3896	51.3279	59.6204	42.6136	39.8149	40.6889	47.6274	48.3081	50.2794	38.0693	40.0761	38.2344	Nol7	nucleolar_protein_7
ENSMUSG00000028398	46.0585	59.3291	59.2297	40.9515	39.8016	43.6877	49.8096	48.4927	54.3978	39.3792	43.7556	40.826	Tmem261	transmembrane_protein_261
ENSMUSG00000031446	30.7089	33.9614	34.5836	38.6166	39.7906	37.4683	28.8382	29.3288	28.6873	35.0942	35.5905	34.7347	Cul4a	cullin_4A
ENSMUSG00000022797	24.2571	42.055	30.0595	38.8619	39.7448	36.0022	18.2318	20.3106	26.0253	33.1447	40.0462	52.3554	Tfrc	transferrin_receptor
ENSMUSG00000053797	32.5151	8.03373	9.53179	47.5727	39.7398	37.8912	78.7994	69.2342	139.769	440.243	504.631	439.603	Krt16	keratin_16
ENSMUSG00000067367	55.6024	55.9595	66.9378	38.0553	39.7284	38.2274	49.0585	50.7745	48.9551	51.7515	55.834	60.027	Lyar	Ly1_antibody_reactive_clone
ENSMUSG00000030510	6.92658	8.75313	7.10127	35.6463	39.7254	40.5993	11.1087	12.0357	11.8972	17.7809	16.1886	19.6483	Cers3	ceramide_synthase_3
ENSMUSG00000027466	47.5416	49.363	46.8229	41.8227	39.7224	41.1355	42.9794	41.3959	40.6966	38.7069	34.9627	39.1835	Rbck1	RanBP-type_and_C3HC4-type_zinc_finger_containing_1
ENSMUSG00000024858	35.5164	35.5072	33.1059	40.9812	39.7119	42.0242	28.2886	25.7019	31.786	29.0842	28.8727	30.4168	Adrbk1	adrenergic_receptor_kinase_beta_1
ENSMUSG00000068036	25.6537	27.0091	25.2382	40.1523	39.6962	35.601	16.4273	13.7073	16.0074	18.0614	18.8267	21.3275	Mllt4	myeloid/lymphoid_or_mixed-lineage_leukemia_(trithorax_homolog_Drosophila);_translocated_to_4
ENSMUSG00000035150	56.1371	59.1465	52.5615	44.2013	39.6885	45.4783	58.6959	62.8588	53.3463	39.9364	50.9107	34.8616	Eif2s3x	eukaryotic_translation_initiation_factor_2_subunit_3_structural_gene_X-linked
ENSMUSG00000006740	25.7456	29.6881	30.7613	38.7079	39.6872	35.7207	31.299	30.7859	31.0716	40.2459	40.1213	39.7239	Kif5b	kinesin_family_member_5B
ENSMUSG00000010608	23.6285	32.1496	33.2757	40.5134	39.6858	39.4465	25.4434	28.367	27.5689	33.386	28.4103	35.7666	Rbm25	RNA_binding_motif_protein_25
ENSMUSG00000040331	49.0582	57.2391	60.6891	37.6476	39.6679	40.6471	50.4772	48.9068	47.5395	47.9089	41.8324	47.761	Nsmce4a	non-SMC_element_4_homolog_A_(S._cerevisiae)
ENSMUSG00000006392	14.8875	17.6486	22.3857	38.0584	39.6398	42.5916	18.4175	18.6243	19.4099	20.9627	20.6128	21.6367	Med8	mediator_complex_subunit_8
ENSMUSG00000023939	27.957	33.4625	34.7699	41.6543	39.6238	47.0919	17.9246	22.4431	30.9943	31.8792	44.5939	29.4724	Mrpl14	mitochondrial_ribosomal_protein_L14
ENSMUSG00000058704	31.8594	34.4581	36.7547	42.1114	39.5641	39.6227	33.2438	37.1755	37.7603	46.4001	43.9152	45.6299	Memo1	mediator_of_cell_motility_1
ENSMUSG00000037351	51.9074	55.014	52.1301	39.9561	39.562	44.3247	53.4993	48.4721	46.7146	43.659	41.6217	40.2546	Actr1b	ARP1_actin-related_protein_1B_centractin_beta
ENSMUSG00000028409	36.3599	40.1587	42.4713	39.3167	39.5456	37.5406	32.2373	34.7619	32.7817	32.2017	36.0273	32.8419	Smu1	smu-1_suppressor_of_mec-8_and_unc-52_homolog_(C._elegans)
ENSMUSG00000074513	10.5385	12.9771	16.0421	37.7058	39.5143	34.7629	16.1074	17.9141	16.3331	22.3872	26.26	21.9282	Arfip1	ADP-ribosylation_factor_interacting_protein_1
ENSMUSG00000037851	32.7622	32.7813	31.9497	38.9841	39.4325	38.7832	27.432	25.3273	29.9013	45.8084	47.4356	48.85	Iars	isoleucine-tRNA_synthetase
ENSMUSG00000034522	64.1464	56.6058	61.1171	38.893	39.4196	36.8097	49.3874	46.4854	51.2388	40.1724	37.9927	37.7249	Zfp395	zinc_finger_protein_395
ENSMUSG00000024271	33.2894	33.4493	37.3311	38.3701	39.3896	38.5117	26.4248	26.8143	23.0242	27.4664	23.0103	27.0623	Elp2	elongator_acetyltransferase_complex_subunit_2
ENSMUSG00000032112	28.1011	30.7311	30.983	36.4868	39.3788	38.6465	33.2558	28.0435	28.0158	35.8313	35.5876	31.9932	Trappc4	trafficking_protein_particle_complex_4
ENSMUSG00000031820	48.9538	45.2789	48.1574	36.6022	39.3405	41.4536	36.76	37.0899	37.672	34.6006	35.8107	36.9137	Babam1	BRISC_and_BRCA1_A_complex_member_1
ENSMUSG00000051403	34.122	37.1132	35.4199	40.5327	39.2826	42.0378	35.0494	32.8984	31.8403	35.1305	33.0864	36.8942	Ppp1r37	protein_phosphatase_1_regulatory_subunit_37
ENSMUSG00000024006	20.3988	20.9292	21.0641	37.9433	39.2783	41.1452	21.8224	22.0131	21.5141	31.0998	29.4262	33.4149	Stk38	serine/threonine_kinase_38
ENSMUSG00000027472	26.1042	32.7789	31.6386	39.5807	39.2744	45.7272	17.5863	20.8908	14.8875	25.4508	28.9281	24.5476	Pdrg1	p53_and_DNA_damage_regulated_1
ENSMUSG00000032299	23.9654	35.2465	35.468	39.2735	39.2714	43.4098	25.5061	22.0674	27.3151	33.6389	25.5231	28.0934	Commd4	COMM_domain_containing_4
ENSMUSG00000020780	46.5231	39.5534	42.9252	39.9106	39.259	42.0072	42.4979	40.037	42.8179	44.7909	41.6904	42.0788	Srp68	signal_recognition_particle_68
ENSMUSG00000024498	35.9942	43.6454	45.3498	38.0239	39.2262	38.5271	36.6294	36.0996	38.1709	38.8539	36.3509	39.7291	Tcerg1	transcription_elongation_regulator_1_(CA150)
ENSMUSG00000002052	35.4465	32.5947	34.9886	38.9863	39.2194	35.5895	26.3742	24.4881	28.9237	28.329	30.4291	34.7502	Supt6	suppressor_of_Ty_6
ENSMUSG00000025026	30.1056	33.7592	33.5079	38.6864	39.2037	37.2914	26.6418	24.565	23.0009	17.862	18.9309	18.1794	Add3	adducin_3_(gamma)
ENSMUSG00000025465	26.6275	26.7879	25.4191	38.9644	39.1747	36.735	21.2352	21.9989	20.1309	21.118	22.2302	23.9507	Echs1	enoyl_Coenzyme_A_hydratase_short_chain_1_mitochondrial
ENSMUSG00000050552	27.0618	27.4976	27.3369	35.645	39.1679	37.6212	25.7027	26.725	28.1025	33.6839	32.0852	35.2496	Lamtor4	late_endosomal/lysosomal_adaptor_MAPK_and_MTOR_activator_4
ENSMUSG00000005413	8.1061	7.90692	9.57279	44.1298	39.1488	32.4756	4.52711	5.18219	3.48192	17.5104	21.6329	18.8687	Hmox1	heme_oxygenase_(decycling)_1
ENSMUSG00000024583	35.9861	49.0034	52.4051	38.9975	39.1288	37.1265	36.6855	37.8862	39.076	33.9068	38.6298	35.0598	Txnl1	thioredoxin-like_1
ENSMUSG00000025409	41.9805	46.6213	43.4719	40.3304	39.079	42.989	36.6993	32.681	44.8932	40.7575	38.2482	41.9587	Mbd6	methyl-CpG_binding_domain_protein_6
ENSMUSG00000022951	54.3329	56.0293	48.0972	38.3693	39.0754	34.3083	57.5773	55.4824	60.7361	100.99	97.1492	103.544	Rcan1	regulator_of_calcineurin_1
ENSMUSG00000028191	29.5623	34.9085	35.4884	38.6359	39.0637	34.6865	46.7727	45.0016	48.003	57.0978	60.7138	56.7923	Bcl10	B_cell_leukemia/lymphoma_10
ENSMUSG00000032547	114.949	105.565	106.416	40.3159	38.9717	41.8916	86.4173	90.0963	79.2287	46.5912	47.3015	43.2499	Ryk	receptor-like_tyrosine_kinase
ENSMUSG00000038991	76.7336	69.9242	68.9656	39.4412	38.9264	44.335	51.3301	51.6412	54.3915	42.641	40.4441	40.5908	Txndc5	thioredoxin_domain_containing_5
ENSMUSG00000029066	39.0943	41.2884	45.6024	42.2549	38.8705	42.2482	37.2282	40.5636	39.581	42.2466	47.4739	44.6664	Mrpl20	mitochondrial_ribosomal_protein_L20
ENSMUSG00000032501	28.3591	23.7091	19.0154	45.1144	38.8345	29.3853	58.402	45.7237	61.1059	56.7285	78.8402	61.1298	Trib1	tribbles_homolog_1_(Drosophila)
ENSMUSG00000064326	135.824	165.708	156.888	31.2627	38.8332	38.3946	100.544	97.9028	101.661	44.2748	54.5789	37.7053	Siva1	SIVA1_apoptosis-inducing_factor
ENSMUSG00000005936	42.3314	37.3789	38.7646	37.8415	38.83	38.0376	35.9731	35.7037	34.3763	35.7205	38.8984	36.4592	Kctd20	potassium_channel_tetramerisation_domain_containing_20
ENSMUSG00000017428	36.9589	35.2602	42.0238	40.224	38.8215	37.632	36.8585	38.8337	37.3738	39.0981	39.9379	37.9267	Psmd11	proteasome_(prosome_macropain)_26S_subunit_non-ATPase_11
ENSMUSG00000028156	27.6827	37.7358	40.2109	35.6453	38.8098	35.1194	34.1053	33.3122	33.9554	40.3947	40.6543	42.7677	Eif4e	eukaryotic_translation_initiation_factor_4E
ENSMUSG00000033862	21.5221	27.676	24.582	38.9328	38.7699	41.1094	20.3606	19.1816	21.3854	27.2691	23.4674	29.8273	Cdk10	cyclin-dependent_kinase_10
ENSMUSG00000071847	127.606	75.4787	86.3414	42.9694	38.7628	39.1951	199.074	194.625	163.457	110.373	110.883	101.381	Apcdd1	adenomatosis_polyposis_coli_down-regulated_1
ENSMUSG00000022629	22.8204	24.1797	23.7659	41.7959	38.7256	38.0172	29.6785	28.258	32.4584	31.0492	35.3438	27.8086	Kif21a	kinesin_family_member_21A
ENSMUSG00000057236	70.9941	68.4048	77.7896	36.4298	38.71	37.0692	67.8379	71.841	68.4855	33.0289	35.5841	32.6466	Rbbp4	retinoblastoma_binding_protein_4
ENSMUSG00000035967	3.95646	4.47734	4.24594	39.8266	38.7078	47.2403	6.23374	7.37161	7.9746	24.8191	19.188	26.0924	Ddx26b	DEAD/H_(Asp-Glu-Ala-Asp/His)_box_polypeptide_26B
ENSMUSG00000024750	14.1442	23.5322	20.1288	40.1719	38.6994	39.931	22.6627	21.8699	27.3801	43.9497	46.0169	47.3588	Zfand5	zinc_finger_AN1-type_domain_5
ENSMUSG00000034269	31.4541	34.4891	32.1635	37.0946	38.6834	34.5969	27.5491	25.4121	25.9593	29.552	29.4858	30.7441	Setd5	SET_domain_containing_5
ENSMUSG00000029063	37.5904	36.4579	37.6518	40.1242	38.6762	39.9091	41.507	37.2787	36.857	47.807	48.9465	45.346	Nadk	NAD_kinase
ENSMUSG00000026688	26.4608	19.5602	18.3622	39.6089	38.6667	37.9806	31.1464	34.2659	35.6401	53.659	51.7817	50.4027	Mgst3	microsomal_glutathione_S-transferase_3
ENSMUSG00000071711	42.3625	38.5577	37.2373	36.2446	38.6504	35.674	41.0512	38.1874	37.3655	19.4741	25.2079	19.0229	Mpst	mercaptopyruvate_sulfurtransferase
ENSMUSG00000040188	21.1169	19.8179	19.68	40.0716	38.6048	41.0801	18.9739	16.1245	16.7011	24.6927	22.8999	25.3433	Scamp2	secretory_carrier_membrane_protein_2
ENSMUSG00000027712	118.209	112.066	120.376	44.5794	38.5983	39.3886	136.663	142.025	127.413	122.659	121.156	116.09	Anxa5	annexin_A5
ENSMUSG00000074088	63.4111	57.8406	69.1289	36.338	38.5765	34.1035	54.8552	53.8972	49.1	41.221	39.9546	38.9969	Snrnp40	small_nuclear_ribonucleoprotein_40_(U5)
ENSMUSG00000066150	15.3415	14.6289	13.9612	36.0762	38.5757	35.6463	12.0892	13.2175	14.0113	15.6263	15.8834	16.8534	Slc31a1	solute_carrier_family_31_member_1
ENSMUSG00000032612	39.7604	32.6317	38.4	38.6574	38.5737	39.8381	34.6281	33.2496	31.3672	31.2441	29.3007	29.4237	Usp4	ubiquitin_specific_peptidase_4_(proto-oncogene)
ENSMUSG00000057342	16.3504	18.4741	17.5899	36.6262	38.5637	39.6367	16.1136	15.1638	14.5788	24.4316	24.3496	24.3841	Sphk2	sphingosine_kinase_2
ENSMUSG00000047879	18.1329	23.938	24.7675	40.2403	38.5616	38.4843	21.178	24.4183	21.503	32.0748	34.8596	34.9265	Usp14	ubiquitin_specific_peptidase_14
ENSMUSG00000025220	35.1393	36.1534	34.2165	37.6749	38.5204	37.3688	27.6463	26.4501	30.8222	27.0042	27.9075	30.0872	Mgea5	meningioma_expressed_antigen_5_(hyaluronidase)
ENSMUSG00000027215	33.0823	30.1223	26.8716	39.0489	38.5188	42.8639	33.7833	34.6861	30.3767	28.2656	27.7516	28.0441	Cd82	CD82_antigen
ENSMUSG00000030876	27.0839	37.3549	40.8529	37.8192	38.4545	38.5239	33.4279	35.0489	28.1338	28.1583	31.375	31.9734	Mettl9	methyltransferase_like_9
ENSMUSG00000020224	37.4583	37.0387	42.4658	34.6686	38.4322	41.7253	28.8066	34.7227	32.6158	34.924	36.7935	34.8802	Llph	LLP_homolog_long-term_synaptic_facilitation_(Aplysia)
ENSMUSG00000031667	8.41626	11.2316	11.6419	36.3128	38.4101	39.7944	5.97884	4.67168	5.75733	12.9914	15.1073	14.7394	Aktip	thymoma_viral_proto-oncogene_1_interacting_protein
ENSMUSG00000032218	59.393	61.9257	59.2668	38.1079	38.3723	38.5786	58.834	52.5744	53.0409	35.6803	35.5575	38.5665	Ccnb2	cyclin_B2
ENSMUSG00000021665	8.82394	8.69442	8.36766	35.7668	38.3295	38.7802	6.44774	5.19976	7.26897	10.8788	12.3181	13.339	Hexb	hexosaminidase_B
ENSMUSG00000032178	82.0817	84.0171	90.5386	38.1353	38.3291	38.338	73.3727	67.3617	69.3674	38.8718	38.6529	36.6393	Ilf3	interleukin_enhancer_binding_factor_3
ENSMUSG00000021607	37.083	40.8371	46.6189	35.5485	38.2651	38.1768	41.7626	43.4801	36.1291	47.8746	51.9481	47.5203	Mrpl36	mitochondrial_ribosomal_protein_L36
ENSMUSG00000020739	48.9511	53.8995	54.7435	37.2968	38.2604	41.6239	45.9119	46.2534	42.4831	35.5267	32.3612	36.8022	Nup85	nucleoporin_85
ENSMUSG00000026554	38.2117	36.2662	39.8131	40.0375	38.2552	41.816	34.3588	32.9522	29.917	27.2115	27.4604	27.4962	Dcaf8	DDB1_and_CUL4_associated_factor_8
ENSMUSG00000022365	31.0455	31.6085	29.2172	37.6651	38.2525	38.06	29.1183	27.2531	26.2262	32.6741	31.1247	35.9091	Derl1	Der1-like_domain_family_member_1
ENSMUSG00000056851	66.309	60.2921	66.4666	38.2623	38.2369	35.6044	46.8223	48.3418	56.6086	37.5695	38.6241	38.237	Pcbp2	poly(rC)_binding_protein_2
ENSMUSG00000029404	52.2091	53.0546	53.676	35.5641	38.2346	39.941	42.8295	48.5103	48.0071	34.5424	39.006	35.9682	Arl6ip4	ADP-ribosylation_factor-like_6_interacting_protein_4
ENSMUSG00000018965	102.024	114.918	122.015	36.3194	38.2039	36.3071	109.369	107.553	102.181	55.2255	58.18	44.8441	Ywhah	tyrosine_3-monooxygenase/tryptophan_5-monooxygenase_activation_protein_eta_polypeptide
ENSMUSG00000028811	35.9831	33.6398	34.2388	38.2429	38.199	41.6801	31.0435	31.7013	32.3908	41.4577	39.1252	41.7033	Yars	tyrosyl-tRNA_synthetase
ENSMUSG00000024644	66.414	58.6088	64.9303	36.9845	38.1863	35.0278	41.2139	39.6703	39.7705	39.8013	41.2522	40.284	Cndp2	CNDP_dipeptidase_2_(metallopeptidase_M20_family)
ENSMUSG00000030203	10.9694	13.6961	8.2411	35.6425	38.1546	37.4878	6.73319	5.91963	6.71058	7.62278	8.06932	9.02084	Dusp16	dual_specificity_phosphatase_16
ENSMUSG00000024774	8.79124	11.5808	7.75737	35.108	38.1331	36.7469	7.49151	6.81217	7.88976	29.3936	28.6046	28.2997	Ankrd22	ankyrin_repeat_domain_22
ENSMUSG00000033767	21.5291	23.4176	22.7287	40.1388	38.1163	35.7509	22.3697	20.8346	22.2225	35.0183	30.0103	36.1426	D930015E06Rik	RIKEN_cDNA_D930015E06_gene
ENSMUSG00000031245	32.5424	34.5199	38.4084	35.212	38.1117	35.4663	39.2367	44.5015	38.9857	31.2963	32.7831	31.76	Hmgn5	high-mobility_group_nucleosome_binding_domain_5
ENSMUSG00000024045	35.3277	45.3573	44.9167	39.6709	38.1078	38.9656	35.2783	38.0025	34.253	38.4765	34.9736	40.1758	Akap8	A_kinase_(PRKA)_anchor_protein_8
ENSMUSG00000038712	12.2225	10.7018	11.1117	38.9845	38.0296	40.566	13.7845	12.9403	13.0816	19.6305	22.0977	23.8224	Fam63a	family_with_sequence_similarity_63_member_A
ENSMUSG00000062908	19.5734	24.1997	23.9938	38.6857	38.0255	37.7062	21.2526	20.3866	21.1714	40.8693	44.1433	34.6751	Acadm	acyl-Coenzyme_A_dehydrogenase_medium_chain
ENSMUSG00000002372	39.4096	46.4491	49.668	42.4978	37.9842	43.5314	39.1443	38.6896	35.3906	35.0834	32.7427	35.2073	Ranbp3	RAN_binding_protein_3
ENSMUSG00000020777	13.4028	11.5837	11.0717	38.8263	37.9492	38.3924	12.0574	10.6746	11.349	20.035	20.5308	19.9433	Acox1	acyl-Coenzyme_A_oxidase_1_palmitoyl
ENSMUSG00000058239	46.5958	46.7434	44.3966	37.8053	37.9471	36.8336	45.2006	44.0934	45.8894	43.2013	40.3625	40.689	Usf2	upstream_transcription_factor_2
ENSMUSG00000028910	33.0598	37.3955	36.318	38.7196	37.9401	39.2711	23.505	24.9288	26.2799	34.2264	36.6263	34.8957	Mecr	mitochondrial_trans-2-enoyl-CoA_reductase
ENSMUSG00000015291	24.1682	29.3909	24.6007	40.874	37.9397	43.9563	21.2193	21.7601	24.422	33.8572	29.0787	32.5191	Gdi1	guanosine_diphosphate_(GDP)_dissociation_inhibitor_1
ENSMUSG00000033581	49.6297	52.8521	52.5628	36.0036	37.9325	36.6511	24.7107	23.6486	31.7033	21.1888	22.7443	22.8367	Igf2bp2	insulin-like_growth_factor_2_mRNA_binding_protein_2
ENSMUSG00000007036	29.1021	30.6832	29.4782	37.4231	37.9212	40.3	27.9436	26.343	26.6182	33.7623	28.7549	32.6051	Abhd16a	abhydrolase_domain_containing_16A
ENSMUSG00000066979	50.7441	57.7961	58.7387	36.2294	37.8774	36.587	54.191	49.674	45.8514	34.3339	29.2976	33.9433	Bub3	budding_uninhibited_by_benzimidazoles_3_homolog_(S._cerevisiae)
ENSMUSG00000026269	32.6037	27.2483	29.8245	33.713	37.864	37.5171	39.8029	36.1574	34.7594	40.515	36.5988	42.2219	Rnpepl1	arginyl_aminopeptidase_(aminopeptidase_B)-like_1
ENSMUSG00000026926	41.7785	38.4068	41.5946	37.0617	37.8476	36.3329	31.8091	29.6676	32.5827	28.47	30.0895	30.2696	Pmpca	peptidase_(mitochondrial_processing)_alpha
ENSMUSG00000020171	39.7299	46.3177	52.0011	36.435	37.8138	37.8855	33.6023	35.6871	36.8294	27.4373	31.3603	28.1112	Yeats4	YEATS_domain_containing_4
ENSMUSG00000039656	49.8329	50.0579	42.6726	36.9358	37.7887	40.3204	42.1835	39.8797	41.0035	38.2158	36.5131	37.2497	Rxrb	retinoid_X_receptor_beta
ENSMUSG00000018707	40.7213	30.7204	30.5028	37.7157	37.72	31.4404	33.4359	26.0803	26.9	28.319	28.5516	33.0795	Dync1h1	dynein_cytoplasmic_1_heavy_chain_1
ENSMUSG00000033629	23.4802	28.6045	26.4006	32.042	37.6998	34.3905	27.8588	28.9292	28.9393	34.9883	32.0303	36.1696	Ptplad1	protein_tyrosine_phosphatase-like_A_domain_containing_1
ENSMUSG00000057506	40.9755	42.9594	43.9198	41.9103	37.6862	40.9107	32.7159	33.7382	34.6048	31.3404	34.7559	31.3709	Bloc1s2	biogenesis_of_lysosomal_organelles_complex-1_subunit_2
ENSMUSG00000024875	21.1804	19.7336	17.9778	40.5485	37.6859	41.7597	17.2171	17.8593	20.5376	26.3632	27.4479	29.6067	Yif1a	Yip1_interacting_factor_homolog_A_(S._cerevisiae)
ENSMUSG00000032046	21.2975	17.7784	19.0112	44.2292	37.6746	43.385	19.2388	20.3828	20.5841	20.295	18.5145	20.4252	Abhd12	abhydrolase_domain_containing_12
ENSMUSG00000031734	17.4576	25.9484	18.8181	38.0661	37.6418	37.9755	13.0758	10.5032	18.3007	32.3817	48.8213	43.074	Irx3	Iroquois_related_homeobox_3
ENSMUSG00000015869	45.6773	37.9255	43.2425	35.0742	37.5825	37.8549	34.1188	34.473	35.0068	37.1478	36.8191	37.3893	Prpsap1	phosphoribosyl_pyrophosphate_synthetase-associated_protein_1
ENSMUSG00000034681	52.5482	74.9129	69.6339	34.6024	37.5798	32.9148	49.8691	54.8512	51.6238	30.9995	32.3509	41.4401	Rnps1	ribonucleic_acid_binding_protein_S1
ENSMUSG00000021109	20.3613	23.9178	28.0009	36.3969	37.5724	31.5355	22.3122	24.2974	27.2062	56.9796	68.558	69.7831	Hif1a	hypoxia_inducible_factor_1_alpha_subunit
ENSMUSG00000023015	44.2464	47.2756	44.1627	35.8989	37.5675	38.4032	44.9323	40.1928	40.9661	29.1009	27.0232	31.7	Racgap1	Rac_GTPase-activating_protein_1
ENSMUSG00000091383	32.3459	62.3096	38.9267	39.3389	37.5336	37.1378	47.9279	46.748	26.7517	25.1986	25.0915	20.8191	Hist1h2al	histone_cluster_1_H2al
ENSMUSG00000063888	49.1792	49.8055	53.7763	36.5577	37.5318	40.3534	39.9127	40.4123	34.6011	37.8849	39.0853	36.4142	Rpl7l1	ribosomal_protein_L7-like_1
ENSMUSG00000059409	67.8355	57.1204	59.3746	36.1085	37.5287	37.9719	51.1082	46.5882	50.2628	39.0639	38.7217	34.9467	Ppp2r5d	protein_phosphatase_2_regulatory_subunit_B'_delta
ENSMUSG00000006445	37.6531	42.0057	25.4667	40.166	37.512	29.2877	39.8008	32.7806	49.6961	46.9069	48.7672	55.9465	Epha2	Eph_receptor_A2
ENSMUSG00000001036	13.6935	14.1108	13.7375	38.9756	37.4928	36.2972	15.3197	14.6608	15.4183	24.6786	26.1434	25.8373	Epn2	epsin_2
ENSMUSG00000068523	20.5451	28.3958	28.1487	36.2165	37.4805	38.4957	22.5666	22.3063	21.5565	30.2925	31.1113	31.772	Gng5	guanine_nucleotide_binding_protein_(G_protein)_gamma_5
ENSMUSG00000020537	42.7758	34.1509	41.2892	37.8899	37.4193	38.6138	32.6637	32.274	29.2161	39.1509	39.7267	40.784	Drg2	developmentally_regulated_GTP_binding_protein_2
ENSMUSG00000032577	17.3966	12.52	12.9399	39.174	37.4085	41.9194	23.8762	21.4301	21.1567	33.0035	29.8166	31.9572	Mapkapk3	mitogen-activated_protein_kinase-activated_protein_kinase_3
ENSMUSG00000032288	49.6453	48.0324	50.3546	38.3509	37.3876	34.0621	46.3944	49.3045	41.7582	33.1618	39.7758	33.1827	Imp3	IMP3_U3_small_nucleolar_ribonucleoprotein_homolog_(yeast)
ENSMUSG00000043889	16.3504	22.5464	37.6348	5.9912	37.3855	41.6984	26.7705	38.5271	66.464	34.4539	100.744	42.927	Gm8399	predicted_gene_8399
ENSMUSG00000044783	28.7076	37.5362	32.0057	41.1069	37.3325	39.1018	22.1698	21.9859	22.3923	18.2971	14.3925	18.1547	Hjurp	Holliday_junction_recognition_protein
ENSMUSG00000035569	33.3441	33.5265	31.1905	39.5346	37.3299	35.0419	29.2116	24.1225	25.5986	32.5431	31.3849	33.8967	Ankrd11	ankyrin_repeat_domain_11
ENSMUSG00000027282	24.5489	23.352	25.3286	34.6336	37.3297	36.8685	26.1963	28.3084	27.1519	29.2021	33.7886	33.1509	Mtch2	mitochondrial_carrier_homolog_2_(C._elegans)
ENSMUSG00000016528	56.2785	52.4233	56.7302	36.4542	37.3178	40.5753	58.1747	53.5266	49.0326	35.8996	36.5198	37.7262	Mapkapk2	MAP_kinase-activated_protein_kinase_2
ENSMUSG00000044496	36.5731	34.2364	31.3983	37.5977	37.3084	35.6893	39.9334	37.4216	35.2356	36.317	34.0499	36.6186	2510039O18Rik	RIKEN_cDNA_2510039O18_gene
ENSMUSG00000062997	307.821	224.653	283.838	44.2794	37.2885	35.752	87.817	111.66	248.121	28.182	29.969	30.3043	Rpl35	ribosomal_protein_L35
ENSMUSG00000038733	22.9108	25.9282	25.1587	37.9253	37.2687	35.9418	24.7178	23.8545	24.3242	27.2506	27.0155	26.7126	Wdr26	WD_repeat_domain_26
ENSMUSG00000036850	43.8677	56.0591	56.0352	39.5592	37.255	39.3996	31.4868	36.953	41.015	29.5499	35.4052	29.3043	Mrpl41	mitochondrial_ribosomal_protein_L41
ENSMUSG00000004393	35.3692	33.3389	34.7339	35.9241	37.236	42.3465	30.4067	28.3123	27.7073	40.0138	37.5796	42.1926	Ddx56	DEAD_(Asp-Glu-Ala-Asp)_box_polypeptide_56
ENSMUSG00000021819	30.3348	30.9902	31.0768	36.3775	37.2333	36.6866	27.5399	25.12	26.7381	21.0984	18.6509	20.8546	Zswim8	zinc_finger_SWIM-type_containing_8
ENSMUSG00000033793	18.2067	19.47	19.9515	39.1063	37.2279	35.471	21.6141	22.696	21.7434	35.9871	42.2339	37.0072	Atp6v1h	ATPase_H+_transporting_lysosomal_V1_subunit_H
ENSMUSG00000018287	57.4524	58.8321	68.3378	38.9253	37.2271	41.2506	45.8657	46.3181	47.6853	32.8734	32.9116	35.0082	Spag7	sperm_associated_antigen_7
ENSMUSG00000026470	35.3601	31.2062	33.9429	34.5409	37.2265	37.9508	35.432	33.9257	31.1928	28.1192	27.922	27.5146	Stx6	syntaxin_6
ENSMUSG00000039262	62.7631	59.077	60.5021	37.882	37.2107	37.5255	52.3644	43.8365	43.9874	30.4176	32.4766	31.8804	Prrc2b	proline-rich_coiled-coil_2B
ENSMUSG00000025968	37.2376	40.8068	38.5357	38.0374	37.176	38.2802	32.9812	30.3424	33.3956	39.1663	35.9723	36.2184	Ndufs1	NADH_dehydrogenase_(ubiquinone)_Fe-S_protein_1
ENSMUSG00000021678	12.6002	12.798	10.9253	34.8311	37.1379	30.1125	20.2399	19.3494	20.491	27.0652	29.0114	26.4414	F2rl1	coagulation_factor_II_(thrombin)_receptor-like_1
ENSMUSG00000028184	22.1795	32.0344	25.5204	37.2889	37.1235	30.46	18.5585	15.4268	19.6116	17.7373	17.2986	19.961	Lphn2	latrophilin_2
ENSMUSG00000050608	36.3029	45.6744	43.6128	37.4346	37.113	37.4732	35.3344	41.2386	38.9398	34.4022	34.7015	35.765	Minos1	mitochondrial_inner_membrane_organizing_system_1
ENSMUSG00000013465	37.4175	33.7222	37.8792	40.139	37.1027	41.3593	28.9966	30.4349	30.0174	30.6519	32.081	29.4844	Nelfb	negative_elongation_factor_complex_member_B
ENSMUSG00000020457	37.0467	34.7609	38.6663	38.3653	37.0272	38.2142	30.0868	31.7735	30.5693	31.5193	29.7262	31.3738	Drg1	developmentally_regulated_GTP_binding_protein_1
ENSMUSG00000025139	26.0078	24.1853	23.3871	38.138	37.0054	35.3977	29.4092	25.2614	27.1258	42.0686	44.4298	48.0256	Tollip	toll_interacting_protein
ENSMUSG00000018761	31.1297	34.9932	32.456	36.4412	36.9652	39.2173	36.6019	39.9811	34.1826	30.2154	29.3438	33.1134	Mpdu1	mannose-P-dolichol_utilization_defect_1
ENSMUSG00000019877	18.8294	25.4366	24.3124	36.1426	36.9641	38.457	24.569	23.4607	24.562	26.581	24.6995	29.5075	Serinc1	serine_incorporator_1
ENSMUSG00000052566	21.0746	22.9004	22.5291	36.616	36.9284	43.1236	19.918	20.1664	21.9199	28.7902	24.3453	31.2623	Hook2	hook_homolog_2_(Drosophila)
ENSMUSG00000030374	39.9507	38.9347	37.3574	37.0273	36.9076	37.025	36.5525	35.3976	33.9587	37.6815	36.5864	38.8788	Strn4	striatin_calmodulin_binding_protein_4
ENSMUSG00000059288	7.79972	8.83905	9.39558	35.7009	36.8726	33.007	9.34621	8.46244	8.86373	10.9535	11.8521	11.5496	Cdyl	chromodomain_protein_Y_chromosome-like
ENSMUSG00000068328	23.7539	27.2452	23.5706	38.8492	36.8677	44.0647	26.0126	24.6228	27.824	36.27	30.0604	39.0457	Aup1	ancient_ubiquitous_protein_1
ENSMUSG00000034022	50.7512	50.7646	51.5031	35.2571	36.8473	37.3548	43.1791	40.7103	46.2075	42.2042	34.5928	43.7899	Cpsf1	cleavage_and_polyadenylation_specific_factor_1
ENSMUSG00000075232	23.6642	32.8111	27.601	33.3951	36.8275	36.4164	28.9856	27.5834	24.4918	31.8166	30.3396	31.9264	Amd1	S-adenosylmethionine_decarboxylase_1
ENSMUSG00000056770	34.8711	32.8856	37.0746	38.8445	36.8226	35.2614	32.9564	32.4738	30.8632	35.6541	36.0456	38.928	Setd3	SET_domain_containing_3
ENSMUSG00000025261	32.5627	32.1614	30.8178	37.5797	36.7902	30.1411	28.3414	22.6289	22.3841	26.7697	29.3851	30.2564	Huwe1	HECT_UBA_and_WWE_domain_containing_1
ENSMUSG00000066306	59.863	54.9514	56.0732	36.7782	36.7824	34.4528	50.5384	47.4889	44.8408	27.964	26.9228	29.4478	Numa1	nuclear_mitotic_apparatus_protein_1
ENSMUSG00000035297	40.023	39.541	45.3444	35.2998	36.7716	36.5116	34.0089	32.0139	31.5997	27.3609	31.0704	27.4438	Cops4	COP9_(constitutive_photomorphogenic)_homolog_subunit_4_(Arabidopsis_thaliana)
ENSMUSG00000024525	70.6186	64.996	70.1059	37.3881	36.7701	35.0395	73.7906	71.9293	66.4909	50.6096	50.3674	45.7175	Impa2	inositol_(myo)-1(or_4)-monophosphatase_2
ENSMUSG00000051518	42.0205	42.5152	46.093	38.686	36.763	42.0126	31.4008	38.1605	36.0446	29.8133	33.5985	33.8624	Rps19bp1	ribosomal_protein_S19_binding_protein_1
ENSMUSG00000021111	53.8015	56.7211	59.9832	35.4461	36.7628	32.2558	47.4761	48.0257	49.9511	42.4004	42.0023	38.0577	Papola	poly_(A)_polymerase_alpha
ENSMUSG00000003868	66.3084	71.68	77.434	36.443	36.7475	35.578	48.1052	50.5127	56.9902	40.0227	40.982	42.5155	Ruvbl2	RuvB-like_protein_2
ENSMUSG00000018476	49.1697	44.1389	34.5275	37.5288	36.7368	35.4073	29.5615	29.5205	39.3654	34.4464	35.6582	31.9403	Kdm6b	KDM1_lysine_(K)-specific_demethylase_6B
ENSMUSG00000022123	4.76834	4.95554	4.13822	39.2129	36.7315	42.8723	1.76981	2.40305	1.58741	3.94528	3.73135	3.81629	Scel	sciellin
ENSMUSG00000029426	28.744	26.5558	21.2334	35.5717	36.7059	35.1835	34.0056	33.1999	35.3584	30.525	30.3906	30.8062	Scarb2	scavenger_receptor_class_B_member_2
ENSMUSG00000026034	17.4749	27.885	21.0882	40.2117	36.7032	35.951	21.1347	25.5552	32.9215	37.6762	39.7752	40.7971	Clk1	CDC-like_kinase_1
ENSMUSG00000022557	47.5514	44.6006	48.7307	34.5277	36.6962	35.7532	41.6071	39.6188	45.2447	52.7583	46.8209	56.5913	Bop1	block_of_proliferation_1
ENSMUSG00000081534	24.4012	22.0619	21.6281	36.0761	36.671	32.8586	25.2227	24.0301	22.1422	22.8735	25.936	23.4551	Slc48a1	solute_carrier_family_48_(heme_transporter)_member_1
ENSMUSG00000038975	28.6056	43.9821	37.7792	42.9963	36.6386	43.7637	29.8242	32.0947	36.8757	53.0264	48.8227	50.9976	Rabggtb	Rab_geranylgeranyl_transferase_b_subunit
ENSMUSG00000022791	54.9863	47.5837	49.0759	36.5064	36.5948	37.344	66.2761	62.0541	64.3696	54.373	45.1383	52.8456	Tnk2	tyrosine_kinase_non-receptor_2
ENSMUSG00000021948	30.9611	28.4736	25.6987	36.1213	36.5902	39.3388	33.8769	34.2001	40.5848	37.3162	34.2439	36.816	Prkcd	protein_kinase_C_delta
ENSMUSG00000035278	31.5797	32.5887	36.15	38.8363	36.5858	37.2203	24.835	25.7214	25.169	29.8621	28.537	32.5117	Plekhj1	pleckstrin_homology_domain_containing_family_J_member_1
ENSMUSG00000003039	44.9482	44.8934	49.7295	36.7365	36.5555	38.5276	37.5664	40.2903	35.8403	25.6999	24.451	23.3301	Fam32a	family_with_sequence_similarity_32_member_A
ENSMUSG00000053768	49.7696	48.074	52.0156	37.8216	36.5194	38.5158	52.3664	49.2918	52.9133	44.317	47.423	51.1674	Chchd3	coiled-coil-helix-coiled-coil-helix_domain_containing_3
ENSMUSG00000028906	21.7728	20.9578	23.5571	36.095	36.4873	36.9984	14.8207	14.4136	14.5229	20.0668	21.4039	20.9154	Epb4.1	erythrocyte_protein_band_4.1
ENSMUSG00000095098	50.9863	43.148	42.824	44.9443	36.461	30.0238	72.4138	61.3351	72.8456	62.7276	63.6505	59.4086	Ccdc85b	coiled-coil_domain_containing_85B
ENSMUSG00000025332	34.5015	39.6023	31.0303	39.7692	36.4279	42.3738	31.7641	32.202	31.7072	31.384	34.138	29.7464	Kdm5c	lysine_(K)-specific_demethylase_5C
ENSMUSG00000034432	27.5285	29.8521	32.8541	35.1858	36.427	36.9336	26.9666	27.6546	25.4295	28.8234	30.1965	30.0342	Cops8	COP9_(constitutive_photomorphogenic)_homolog_subunit_8_(Arabidopsis_thaliana)
ENSMUSG00000037295	34.4484	30.4863	31.9679	35.0515	36.4266	34.4275	43.2332	41.7273	36.2919	31.5881	29.0486	32.4087	Ldlrap1	low_density_lipoprotein_receptor_adaptor_protein_1
ENSMUSG00000040242	30.6035	35.1427	36.8738	35.8626	36.4073	38.908	31.163	32.5684	31.1798	32.5132	32.0198	34.7241	Fgfr1op2	FGFR1_oncogene_partner_2
ENSMUSG00000071657	9.62676	8.03412	8.04274	37.9315	36.382	38.694	7.41167	8.79158	9.11995	17.2894	18.4654	20.192	Bscl2	Berardinelli-Seip_congenital_lipodystrophy_2_homolog_(seipin)
ENSMUSG00000021645	32.32	30.3517	35.5007	32.876	36.3417	33.0735	22.3033	21.6585	28.8674	26.5596	26.3639	29.4816	Smn1	survival_motor_neuron_1
ENSMUSG00000006058	30.2432	30.743	34.2287	33.7762	36.3033	35.6274	29.7523	28.6436	27.9229	32.2839	31.2378	32.0977	Snf8	SNF8_ESCRT-II_complex_subunit_homolog_(S._cerevisiae)
ENSMUSG00000022614	40.258	39.5297	34.3614	40.6761	36.2989	37.58	33.9193	32.1141	37.748	35.9336	29.5693	40.5857	Lmf2	lipase_maturation_factor_2
ENSMUSG00000032033	35.2877	31.0487	28.2313	35.244	36.2929	38.2806	16.978	14.9116	25.9282	52.1386	57.3876	58.1123	Barx2	BarH-like_homeobox_2
ENSMUSG00000034765	24.3114	27.7927	17.8705	32.1644	36.2691	35.4128	30.6207	25.1846	25.5328	28.3268	43.7303	31.7808	Dusp5	dual_specificity_phosphatase_5
ENSMUSG00000001228	129.956	135.72	154.467	35.5774	36.2446	38.2414	110.647	111.445	101.529	31.565	28.3895	31.5501	Uhrf1	ubiquitin-like_containing_PHD_and_RING_finger_domains_1
ENSMUSG00000030036	68.0599	65.4117	58.3863	37.9141	36.2313	39.8403	53.3064	50.9503	56.8249	46.1008	40.0136	50.3845	Mogs	mannosyl-oligosaccharide_glucosidase
ENSMUSG00000049848	1.89743	1.49632	1.58512	32.7699	36.17	38.2152	0.697428	0.762819	0.91508	6.82259	8.23582	7.95181	Ceacam19	carcinoembryonic_antigen-related_cell_adhesion_molecule_19
ENSMUSG00000014226	42.7542	59.7827	64.8451	37.2512	36.1367	39.6355	48.258	51.7709	52.1521	55.2582	57.6641	52.5028	Cacybp	calcyclin_binding_protein
ENSMUSG00000012123	8.71123	7.42061	6.69272	38.5809	36.1272	43.4415	10.0555	9.03035	11.6181	50.2173	44.1195	54.8581	Aim1l	absent_in_melanoma_1-like
ENSMUSG00000024446	28.2348	33.5734	29.0235	30.7006	36.1245	29.8787	27.631	27.0532	29.788	25.0258	27.8593	30.773	Rpp21	ribonuclease_P_21_subunit
ENSMUSG00000032481	61.0006	56.2832	69.7408	36.3843	36.0981	35.7916	56.742	55.7253	48.5128	31.9599	33.8764	30.0164	Smarcc1	SWI/SNF_related_matrix_associated_actin_dependent_regulator_of_chromatin_subfamily_c_member_1
ENSMUSG00000041958	33.0957	28.9059	29.9849	34.4647	36.0768	34.3172	22.7163	22.7262	23.8868	32.4831	30.9569	35.5728	Pigs	phosphatidylinositol_glycan_anchor_biosynthesis_class_S
ENSMUSG00000026701	46.9844	46.1055	50.7602	37.1877	36.0492	36.1026	37.6159	37.9564	39.6303	41.783	44.7444	42.1528	Prdx6	peroxiredoxin_6
ENSMUSG00000046186	10.65	4.57713	5.0306	39.4397	36.0348	30.5969	32.0279	31.4068	30.3932	63.0825	58.2847	70.4694	Cd109	CD109_antigen
ENSMUSG00000044221	47.6548	46.2191	50.3791	36.2264	36.0295	37.6749	45.6469	45.3026	45.4247	38.2646	39.1779	39.0006	Grsf1	G-rich_RNA_sequence_binding_factor_1
ENSMUSG00000068739	39.2257	33.9501	37.038	37.1064	36.026	34.7185	31.9396	32.6929	33.4683	36.9015	38.2341	35.4418	Sars	seryl-aminoacyl-tRNA_synthetase
ENSMUSG00000025574	49.2447	54.8524	58.4619	37.7345	36.002	37.5987	45.5855	47.5066	44.7283	22.7496	20.0804	24.894	Tk1	thymidine_kinase_1
ENSMUSG00000024212	49.0155	50.5281	52.6234	34.1729	35.9967	36.139	44.9712	40.2089	37.9592	40.3262	39.1886	37.1647	Mllt1	myeloid/lymphoid_or_mixed-lineage_leukemia_(trithorax_homolog_Drosophila);_translocated_to_1
ENSMUSG00000022337	13.9892	18.0765	18.9914	37.856	35.9825	38.7222	18.732	19.9277	18.2282	33.5982	33.3708	29.4705	Emc2	ER_membrane_protein_complex_subunit_2
ENSMUSG00000034673	53.1558	62.8776	61.3068	33.0078	35.9659	36.0679	41.724	37.8494	40.1292	30.0281	29.4361	27.4495	Pbx2	pre_B_cell_leukemia_homeobox_2
ENSMUSG00000020184	14.885	19.3489	17.075	34.8923	35.9446	31.8377	15.5139	15.9437	17.9585	28.5295	29.2296	37.2166	Mdm2	transformed_mouse_3T3_cell_double_minute_2
ENSMUSG00000027163	20.9012	22.4853	26.3706	38.8105	35.9413	36.8705	16.5791	17.4863	14.5942	23.8234	25.9248	21.9251	Commd9	COMM_domain_containing_9
ENSMUSG00000049339	46.8662	37.5564	37.2865	34.1099	35.9336	36.4198	40.2262	36.3325	33.0802	32.037	29.2454	29.9106	Fam134a	family_with_sequence_similarity_134_member_A
ENSMUSG00000098188	13.581	11.8472	10.5282	39.8129	35.9261	32.3688	25.4139	24.0692	27.937	58.6169	60.7819	56.9162	Sowahc	sosondowah_ankyrin_repeat_domain_family_member_C
ENSMUSG00000024537	23.9217	38.8225	33.8739	33.7476	35.9249	38.2113	28.3623	32.8883	24.862	29.4579	27.7934	30.159	Psmg2	proteasome_(prosome_macropain)_assembly_chaperone_2
ENSMUSG00000027893	41.3511	42.8532	48.204	33.9136	35.9222	36.0683	43.9979	45.6619	42.3053	37.4033	32.7454	32.4493	Ahcyl1	S-adenosylhomocysteine_hydrolase-like_1
ENSMUSG00000020232	32.6737	35.1227	32.6222	37.8709	35.9019	38.6518	34.3128	36.3051	34.4887	38.2866	30.5241	38.2494	Hmg20b	high_mobility_group_20B
ENSMUSG00000048251	45.0005	54.7131	41.0741	33.7518	35.8405	33.069	40.778	41.8362	36.1721	29.0976	28.8588	25.2767	Bcl11b	B_cell_leukemia/lymphoma_11B
ENSMUSG00000058835	15.1084	20.3943	21.5003	36.0241	35.8378	34.4844	21.7854	22.1385	21.8278	35.5728	36.2781	34.5982	Abi1	abl-interactor_1
ENSMUSG00000006673	26.5823	32.3856	31.21	33.2099	35.8124	33.1961	25.9271	26.3153	24.8661	25.5284	25.7427	27.4507	Qrich1	glutamine-rich_1
ENSMUSG00000003382	19.8257	21.7481	19.5956	34.1877	35.8105	35.3205	24.3477	22.114	25.1252	20.2269	17.2532	19.3838	Etv3	ets_variant_3
ENSMUSG00000025439	54.2453	54.5601	59.8477	35.4593	35.7949	42.0521	48.8433	53.4219	48.8306	37.8649	37.7689	40.4666	Clns1a	chloride_channel_nucleotide-sensitive_1A
ENSMUSG00000002602	36.3089	46.9699	41.2217	32.939	35.7832	39.2282	23.0367	24.0361	21.4698	10.8475	10.4906	10.7115	Axl	AXL_receptor_tyrosine_kinase
ENSMUSG00000017999	44.1431	43.0366	46.0651	35.8273	35.7697	38.6739	34.167	34.4005	36.1946	41.6139	41.2526	43.5134	Ddx27	DEAD_(Asp-Glu-Ala-Asp)_box_polypeptide_27
ENSMUSG00000030583	31.077	28.0428	27.7081	38.6174	35.756	33.2274	28.0318	27.9168	28.4384	33.7027	34.8056	33.743	Sipa1l3	signal-induced_proliferation-associated_1_like_3
ENSMUSG00000038781	14.4539	13.8854	13.4079	37.0193	35.7486	39.6713	17.3734	18.3594	15.502	26.669	26.6895	25.6707	Stap2	signal_transducing_adaptor_family_member_2
ENSMUSG00000028343	15.8225	22.1365	23.0104	33.8097	35.7374	36.345	21.8332	23.0438	22.7671	39.8146	38.9743	43.0974	Erp44	endoplasmic_reticulum_protein_44
ENSMUSG00000017831	24.4443	30.6718	28.2648	34.945	35.7247	32.8529	30.6443	30.524	30.9611	34.8312	39.3435	31.6105	Rab5a	RAB5A_member_RAS_oncogene_family
ENSMUSG00000025935	18.817	22.9374	25.5594	33.9879	35.7217	33.0727	16.1056	18.7283	17.0982	18.1142	19.0186	19.0978	Tram1	translocating_chain-associating_membrane_protein_1
ENSMUSG00000004642	44.3041	56.3335	57.9265	40.3045	35.689	41.2295	38.6667	43.1065	41.2454	25.8068	28.2885	25.8188	Slbp	stem-loop_binding_protein
ENSMUSG00000019923	41.2528	47.1558	46.6814	32.4934	35.6785	34.4999	25.1503	26.6053	27.1484	23.7108	24.5791	26.6392	Zwint	ZW10_interactor
ENSMUSG00000030286	29.053	28.6837	24.5071	34.9858	35.6707	38.4758	22.9791	23.1338	23.4299	24.0608	25.2634	25.5896	Emc3	ER_membrane_protein_complex_subunit_3
ENSMUSG00000006057	37.1997	37.7761	41.0108	33.2377	35.6656	35.6538	33.1488	33.8052	35.8665	37.2929	40.2753	40.2742	Atp5g1	ATP_synthase_H+_transporting_mitochondrial_F0_complex_subunit_C1_(subunit_9)
ENSMUSG00000032126	38.987	36.388	39.0887	37.6947	35.6638	37.1705	31.3052	31.8964	28.9421	36.0432	35.0544	37.5727	Hmbs	hydroxymethylbilane_synthase
ENSMUSG00000026043	60.8653	24.2387	44.6656	51.3312	35.6551	57.7063	14.5809	1.4249	2.69682	101.102	60.5146	12.2427	Col3a1	collagen_type_III_alpha_1
ENSMUSG00000056214	49.4245	46.2562	53.5641	35.2353	35.6488	32.6481	46.5684	49.1947	39.4089	36.6715	34.8674	33.6395	Pard6g	par-6_family_cell_polarity_regulator_gamma
ENSMUSG00000040354	47.3389	47.8026	44.8125	32.1849	35.6365	39.086	43.4629	43.6904	52.8485	52.1073	49.209	53.8357	Mars	methionine-tRNA_synthetase
ENSMUSG00000028719	8.6436	15.9837	18.1668	34.967	35.6364	33.1895	14.2375	14.9935	14.1269	19.1096	20.7	21.4562	Cmpk1	cytidine_monophosphate_(UMP-CMP)_kinase_1
ENSMUSG00000010205	64.8593	70.1128	70.9018	39.1828	35.6218	36.2338	54.5244	54.7509	55.1611	37.417	39.679	41.208	Raver1	ribonucleoprotein_PTB-binding_1
ENSMUSG00000025060	21.217	25.3943	22.6227	36.3059	35.5832	37.9247	19.9358	18.8113	21.1741	27.3106	27.6431	30.5008	Slk	STE20-like_kinase
ENSMUSG00000020282	28.4334	32.0187	31.1772	37.4909	35.5555	39.2083	28.5579	26.8564	30.8315	29.3332	26.1431	32.8861	Rhbdf1	rhomboid_family_1_(Drosophila)
ENSMUSG00000033021	16.246	20.2859	16.943	37.0308	35.5509	39.7122	17.4228	17.3906	18.0946	30.4111	32.2624	36.3328	Gmppa	GDP-mannose_pyrophosphorylase_A
ENSMUSG00000068876	8.51388	8.94834	7.81922	33.6249	35.5499	37.6376	1.54452	1.95803	2.51765	6.29965	6.74136	8.52709	Cgn	cingulin
ENSMUSG00000032435	18.7862	20.5277	21.3997	35.0582	35.5491	33.3051	26.0741	26.5384	22.7355	36.7952	40.409	37.2308	Dync1li1	dynein_cytoplasmic_1_light_intermediate_chain_1
ENSMUSG00000015013	27.0263	27.8245	27.4174	41.6876	35.5405	36.2131	18.7194	20.4041	27.6374	20.1755	24.7968	24.7509	Trappc2l	trafficking_protein_particle_complex_2-like
ENSMUSG00000020706	43.7573	38.2836	40.4265	38.3024	35.5293	38.4852	31.2	30.1473	30.0438	44.0495	44.3328	49.6549	Ftsj3	FtsJ_homolog_3_(E._coli)
ENSMUSG00000031441	20.3855	20.4411	17.7845	37.2461	35.5287	35.8088	13.9572	12.7177	14.6731	12.7512	11.6354	13.2137	Atp11a	ATPase_class_VI_type_11A
ENSMUSG00000036461	15.4565	22.023	17.3501	34.043	35.5222	30.8489	14.7726	13.3755	13.9457	26.2443	27.3074	25.884	Elf1	E74-like_factor_1
ENSMUSG00000061838	45.3706	51.9499	54.2121	33.155	35.4977	32.7936	41.351	39.5821	38.5026	39.9595	38.9937	38.0738	Suclg2	succinate-Coenzyme_A_ligase_GDP-forming_beta_subunit
ENSMUSG00000027397	20.6377	21.3464	18.9429	33.8378	35.474	36.263	15.2761	15.5705	19.7023	26.764	27.4056	36.2765	Slc20a1	solute_carrier_family_20_member_1
ENSMUSG00000017760	16.1847	15.6162	15.6056	36.989	35.469	37.9238	13.4631	13.699	13.7744	14.7735	14.7457	17.0663	Ctsa	cathepsin_A
ENSMUSG00000017707	16.8735	17.5694	15.9394	37.5966	35.4615	36.5696	18.3708	17.5959	17.5113	20.3067	20.084	21.9085	Serinc3	serine_incorporator_3
ENSMUSG00000057177	59.8026	59.5631	62.0093	35.4857	35.4521	36.3851	44.863	45.7092	48.4143	32.3568	35.216	35.1379	Gsk3a	glycogen_synthase_kinase_3_alpha
[truncated: 33,276 more rows]

## Sheet: IC_signature
Gene_ID	S14	S16	log2FoldChange	pvalue	padj	GeneName	Chrom	Strand	Start	End	GeneLength	GeneType	GeneDescription	E14_5I_1_readcount	E14_5I_2_readcount	E14_5I_3_readcount	E16_5Sp1_readcount	E16_5Sp2_readcount	E16_5Sp3_readcount	E14_5I_1_fpkm	E14_5I_2_fpkm	E14_5I_3_fpkm	E16_5Sp1_fpkm	E16_5Sp2_fpkm	E16_5Sp3_fpkm
ENSMUSG00000050108	2959.69	147.753	4.2959	0	0	Bpifc	chr10	-	85959340	86011895	2714	protein_coding	BPI_fold_containing_family_C	3248	3286	3195	122	142	145	60.3251	58.8285	58.8116	2.26546	2.69699	2.73018
ENSMUSG00000022032	2843.82	89.8374	4.9387	1.1775e-302	1.7606e-299	Scara5	chr14	+	65666403	65764826	3794	protein_coding	scavenger_receptor_class_A_member_5_(putative)	2819	3284	3257	64	96	88	37.4533	42.0567	42.8867	0.850138	1.30429	1.18527
ENSMUSG00000027401	5441.65	425.268	3.6578	2.1483e-297	2.9649e-294	Tgm3	chr2	+	130012349	130050399	4135	protein_coding	transglutaminase_3_E_polypeptide	5574	6161	6169	341	386	451	67.9491	72.3945	74.5318	4.1561	4.81186	5.57358
ENSMUSG00000053702	6593.7	664.521	3.2961	4.9877e-290	5.5931e-287	Nebl	chr2	-	17343909	17731464	8079	protein_coding	nebulette	6721	7661	7311	554	630	656	41.9342	46.0742	45.2086	3.45588	4.01961	4.14934
ENSMUSG00000030513	4285.82	332.365	3.6656	2.4977e-266	2.4897e-263	Pcsk6	chr7	+	65861734	66050340	4354	protein_coding	proprotein_convertase_subtilisin/kexin_type_6	5054	4770	4248	297	288	337	58.5112	53.2304	48.7414	3.43775	3.40961	3.95525
ENSMUSG00000034171	2144.84	157.268	3.7436	1.6585e-247	1.4878e-244	Faah	chr4	-	115967145	116017926	5537	protein_coding	fatty_acid_amide_hydrolase	2340	2253	2460	150	147	139	21.3026	19.7704	22.1954	1.36529	1.3685	1.28284
ENSMUSG00000025885	2067.81	154.548	3.7138	5.5587e-218	3.8359e-215	Myo5b	chr18	+	74440936	74771493	6745	protein_coding	myosin_VB	2240	2333	2225	123	142	163	16.7401	16.8059	16.4797	0.91903	1.08519	1.23492
ENSMUSG00000027993	2371.72	267.487	3.1313	6.353e-213	4.2217e-210	Trim2	chr3	-	84160439	84305446	7428	protein_coding	tripartite_motif-containing_2	2477	2631	2694	231	250	260	16.8092	17.2099	18.1187	1.56728	1.73488	1.78869
ENSMUSG00000022123	2220.1	247.967	3.1434	1.3945e-204	8.3398e-202	Scel	chr14	+	103513341	103613346	3053	protein_coding	sciellin	2375	2308	2620	239	221	228	39.2129	36.7315	42.8723	3.94528	3.73135	3.81629
ENSMUSG00000000392	1464.74	48.9917	4.8283	2.6715e-198	1.4098e-195	Fap	chr2	-	62500943	62574075	2867	protein_coding	fibroblast_activation_protein	1438	1598	1787	43	40	53	25.2827	27.0819	31.1386	0.755871	0.719173	0.944672
ENSMUSG00000045573	4493.62	637.691	2.8022	2.5107e-185	1.0726e-182	Penk	chr4	-	4133531	4138819	1449	protein_coding	preproenkephalin	4711	5144	4924	665	601	503	163.884	172.489	169.766	23.1292	21.38	17.7391
ENSMUSG00000000278	2076.53	281.106	2.8693	9.1297e-180	3.8094e-177	Scpep1	chr11	-	88924020	88955465	2097	protein_coding	serine_carboxypeptidase_1	2211	2239	2380	249	260	270	53.1474	51.8783	56.6997	5.98422	6.3911	6.57958
ENSMUSG00000044594	1275.1	32.1908	5.2079	1.7537e-178	7.151e-176	Serpinb3a	chr1	-	107045587	107052303	1620	protein_coding	serine_(or_cysteine)_peptidase_inhibitor_clade_B_(ovalbumin)_member_3A	1233	1487	1478	26	33	30	38.3654	44.5991	45.5787	0.808844	1.05003	0.946323
ENSMUSG00000021123	3499.92	484.138	2.8363	2.4249e-163	8.2091e-161	Rdh12	chr12	+	79208914	79222665	2753	protein_coding	retinol_dehydrogenase_12	3982	3642	3878	409	408	526	72.91	64.2782	70.3726	7.48727	7.63932	9.76366
ENSMUSG00000029705	4549.75	1068.46	2.0835	4.757e-160	1.5518e-157	Cux1	chr5	-	136248135	136567490	12862	protein_coding	cut-like_homeobox_1	4787	5198	4978	992	988	982	18.7606	19.6362	19.3352	3.88696	3.95958	3.90154
ENSMUSG00000024827	6519.62	677.412	3.2392	5.6857e-155	1.729e-152	Gldc	chr19	-	30098449	30175418	3754	protein_coding	glycine_decarboxylase	7248	7224	6955	510	564	804	97.3231	93.5003	92.5561	6.84672	7.74437	10.9445
ENSMUSG00000047986	1282.59	73.4398	4.0727	2.995e-152	8.8093e-150	Palm3	chr8	+	84021471	84030295	2452	protein_coding	paralemmin_3	1276	1363	1584	51	72	80	26.2314	27.0088	32.2728	1.04823	1.51361	1.66726
ENSMUSG00000067219	1855.81	231.179	2.9822	1.3081e-144	3.5028e-142	Nipal1	chr5	+	72647796	72671078	4205	protein_coding	NIPA-like_domain_containing_1	1882	2222	2001	195	201	245	22.5603	25.6748	23.773	2.33709	2.46395	2.97737
ENSMUSG00000020646	5726.15	1177.94	2.271	1.0592e-137	2.7148e-135	Mboat2	chr12	+	24831599	24960301	2802	protein_coding	membrane_bound_O-acyltransferase_domain_containing_2	6044	6208	6584	966	1100	1196	108.73	107.65	117.388	17.3746	20.236	21.812
ENSMUSG00000044322	7040.84	1488.09	2.2321	6.573e-137	1.661e-134	Dsc1	chr18	-	20084703	20114773	3775	protein_coding	desmocollin_1	7562	7746	7845	1276	1263	1589	100.974	99.6989	103.819	17.0349	17.246	21.51
ENSMUSG00000053931	3394.87	522.007	2.6835	6.0267e-136	1.5018e-133	Cnn3	chr3	+	121426541	121458205	2003	protein_coding	calponin_3_acidic	3301	3763	4115	441	441	566	83.0724	91.2815	102.634	11.0959	11.349	14.44
ENSMUSG00000025997	1340.52	182.213	2.8567	2.4505e-135	6.0229e-133	Ikzf2	chr1	-	69531214	69687245	9278	protein_coding	IKAROS_family_zinc_finger_2	1423	1468	1518	172	151	183	7.73112	7.68779	8.17372	0.934288	0.838926	1.00793
ENSMUSG00000051375	4294.57	956.565	2.1577	3.1769e-134	7.6e-132	Pcdh1	chr18	-	38185915	38212053	5415	protein_coding	protocadherin_1	4677	4742	4700	807	904	938	43.5372	42.5493	43.3612	7.51072	8.6054	8.85192
ENSMUSG00000036528	1771.81	310.889	2.4951	1.07e-132	2.5261e-130	Ppfibp2	chr7	+	107595051	107748582	3826	protein_coding	PTPRF_interacting_protein_binding_protein_2_(liprin_beta_2)	1895	1932	2000	313	253	298	24.9664	24.5353	26.1148	4.12293	3.4086	3.98019
ENSMUSG00000024511	1656.38	267.535	2.6141	6.981e-131	1.5855e-128	Rab27b	chr18	-	69979131	70141605	6891	protein_coding	RAB27B_member_RAS_oncogene_family	1685	1830	1936	237	256	248	12.3256	12.9032	14.0354	1.7333	1.91496	1.83909
ENSMUSG00000034993	8908.36	2116.64	2.0652	9.8271e-131	2.204e-128	Vat1	chr11	-	101458745	101466230	2766	protein_coding	vesicle_amine_transport_protein_1_homolog_(T_californica)	9406	10167	9723	1768	2004	2089	171.413	178.595	175.61	32.2134	37.3462	38.594
ENSMUSG00000038267	1887.37	377.078	2.3106	3.4493e-125	7.1962e-123	Slc22a23	chr13	-	34179158	34345182	6251	protein_coding	solute_carrier_family_22_member_23	2090	2045	2069	363	319	365	16.8534	15.8955	16.5353	2.9266	2.63052	2.98385
ENSMUSG00000038855	2517.49	445.481	2.4833	2.8844e-120	5.6253e-118	Itpkb	chr1	+	180330485	180424802	6235	protein_coding	inositol_145-trisphosphate_3-kinase_B	2903	2527	2843	371	433	429	23.4694	19.6924	22.7794	2.99878	3.57975	3.51604
ENSMUSG00000061666	835.841	43.4445	4.1885	1.8743e-117	3.5398e-115	Gdpd1	chr11	-	87033867	87074062	2336	protein_coding	glycerophosphodiester_phosphodiesterase_domain_containing_1	791	1016	945	37	48	35	17.0685	21.1325	20.2098	0.798244	1.05918	0.765646
ENSMUSG00000066894	1291.35	203.965	2.6424	8.0893e-117	1.5119e-114	Vsig10	chr5	+	117319266	117355005	4053	protein_coding	V-set_and_immunoglobulin_domain_containing_10	1384	1461	1401	185	174	207	17.2128	17.5147	17.2689	2.30039	2.21296	2.60992
ENSMUSG00000006342	857.777	46.0043	4.1365	1.3502e-113	2.447e-111	Susd2	chr10	-	75636619	75644008	3255	protein_coding	sushi_domain_containing_2	1002	811	1006	42	32	54	15.517	12.106	15.4401	0.650287	0.506757	0.847766
ENSMUSG00000003418	1791.06	2.13156	8.5288	1.9833e-113	3.5584e-111	St8sia6	chr2	-	13651020	13793808	7363	protein_coding	ST8_alpha-N-acetyl-neuraminide_alpha-28-sialyltransferase_6	1810	2229	1852	2	0	4	12.3913	14.7091	12.5657	0.0136893	0	0.0277612
ENSMUSG00000034308	1754.98	391.042	2.1546	5.0619e-110	8.4879e-108	Sdr42e1	chr8	-	117661399	117673689	2867	protein_coding	short_chain_dehydrogenase/reductase_family_42E_member_1	1859	1880	2034	379	349	357	32.6846	31.861	35.4426	6.66221	6.27478	6.36317
ENSMUSG00000040624	1750.63	337.59	2.3601	6.9313e-109	1.1515e-106	Plekhg1	chr10	+	3740364	3967303	7369	protein_coding	pleckstrin_homology_domain_containing_family_G_(with_RhoGef_domain)_member_1	1820	1958	1981	280	314	341	12.4496	12.9102	13.4301	1.91494	2.19645	2.36472
ENSMUSG00000030747	6606.77	1099.98	2.5671	7.9544e-109	1.3093e-106	Dgat2	chr7	-	99153663	99182713	2251	protein_coding	diacylglycerol_O-acyltransferase_2	7399	7317	6995	808	1025	1211	165.687	157.938	155.244	18.0902	23.472	27.4917
ENSMUSG00000028497	764.815	31.7697	4.4698	3.325e-108	5.3265e-106	Ptplad2	chr4	-	88396144	88438928	4680	protein_coding	protein_tyrosine_phosphatase-like_A_domain_containing_2	854	876	783	39	14	36	9.19822	9.09469	8.3583	0.419977	0.1542	0.393088
ENSMUSG00000015950	1026.21	105.752	3.2368	4.0914e-108	6.4963e-106	Ncf1	chr5	-	134220053	134229625	2882	protein_coding	neutrophil_cytosolic_factor_1	1164	1045	1164	95	78	121	20.3587	17.6178	20.1772	1.66126	1.39509	2.14548
ENSMUSG00000041842	1195.15	185.452	2.6652	9.6916e-108	1.5121e-105	Fhdc1	chr3	-	84444035	84480429	4162	protein_coding	FH2_domain_containing_1	1278	1273	1380	170	151	194	15.4782	14.8613	16.5645	2.05851	1.87015	2.38195
ENSMUSG00000030203	3480.07	891.758	1.9559	1.3773e-107	2.1303e-105	Dusp16	chr6	-	134715473	134792625	5104	protein_coding	dual_specificity_phosphatase_16	3609	4008	3830	772	799	901	35.6425	38.1546	37.4878	7.62278	8.06932	9.02084
ENSMUSG00000055737	2752.43	746.983	1.8742	7.3464e-107	1.1076e-104	Ghr	chr15	-	3317760	3583492	4175	protein_coding	growth_hormone_receptor	3027	3016	3005	674	698	698	36.5467	35.0998	35.9576	8.13598	8.61787	8.54342
ENSMUSG00000040296	1364.34	197.304	2.7651	1.0523e-106	1.5604e-104	Ddx58	chr4	-	40203773	40239828	3874	protein_coding	DEAD_(Asp-Glu-Ala-Asp)_box_polypeptide_58	1280	1565	1649	172	176	199	16.6549	19.6284	21.2649	2.23756	2.34182	2.62498
ENSMUSG00000004558	4737.12	1262.05	1.9003	2.2603e-105	3.2443e-103	Ndrg2	chr14	-	51905271	51913488	2157	protein_coding	N-myc_downstream_regulated_gene_2	5075	5148	5356	1071	1130	1297	118.598	115.963	124.049	25.0234	27.0041	30.7272
ENSMUSG00000060675	689.474	13.0937	5.5019	4.7318e-104	6.6849e-102	Pla2g16	chr19	+	7557459	7588545	3523	protein_coding	phospholipase_A2_group_XVI	747	689	832	9	17	10	10.6881	9.50247	11.7981	0.128747	0.248735	0.145051
ENSMUSG00000030084	9413.53	3392.67	1.4684	9.8061e-104	1.3745e-101	Plxna1	chr6	-	89316316	89362613	9025	protein_coding	plexin_A1	9919	10494	10549	3279	2880	3261	55.4004	56.4968	58.3937	18.3105	16.4493	18.4645
ENSMUSG00000018398	5104.5	1661.9	1.6139	2.2208e-103	3.0651e-101	44082	chr11	+	53519257	53549565	4563	protein_coding	septin_8	5548	5585	5650	1496	1494	1618	61.2884	59.4706	61.8586	16.523	16.8772	18.1201
ENSMUSG00000007039	2229.68	420.155	2.3907	6.3722e-103	8.6614e-101	Ddah2	chr17	+	35059035	35062095	1342	protein_coding	dimethylarginine_dimethylaminohydrolase_2	2215	2738	2383	387	338	442	83.1981	99.1313	88.7102	14.5333	12.9827	16.8307
ENSMUSG00000039835	3064.79	655.624	2.2116	3.9238e-102	5.2933e-100	Nhsl1	chr10	+	18390322	18533892	7321	protein_coding	NHS-like_1	3344	3627	3101	560	571	687	23.0244	24.0717	21.1609	3.855	4.02038	4.79534
ENSMUSG00000006411	13147.9	3424.1	1.9321	7.7001e-102	1.0234e-99	Pvrl4	chr1	+	171370099	171388598	3636	protein_coding	poliovirus_receptor-related_4	13504	14699	15057	3058	2762	3688	187.211	196.424	206.879	42.3858	39.1562	51.8322
ENSMUSG00000032118	803.97	57.9226	3.732	1.8546e-101	2.4467e-99	Fez1	chr9	+	36821939	36878924	1794	protein_coding	fasciculation_and_elongation_protein_zeta_1_(zygin_I)	834	825	987	38	58	64	23.4334	22.344	27.4851	1.0675	1.6665	1.82302
ENSMUSG00000028716	664.018	39.5677	3.9845	4.5383e-101	5.9435e-99	Pdzk1ip1	chr4	+	115088708	115093899	1129	protein_coding	PDZK1_interacting_protein_1	727	658	799	41	32	37	32.4588	28.3179	35.3553	1.83019	1.46102	1.67471
ENSMUSG00000034919	2096.69	376.333	2.4591	1.1812e-99	1.4924e-97	Ttc22	chr4	+	106622432	106640189	2554	protein_coding	tetratricopeptide_repeat_domain_22	2270	2234	2391	308	311	425	44.802	42.5003	46.7693	6.07766	6.27683	8.50357
ENSMUSG00000027692	1701.39	185.43	3.159	4.601e-99	5.6932e-97	Tnik	chr3	+	28263214	28675858	12276	protein_coding	TRAF2_and_NCK_interacting_kinase	1854	2046	1691	121	190	201	7.61281	8.09801	6.88159	0.496747	0.797807	0.836705
ENSMUSG00000039616	1411.63	278.474	2.3265	3.6643e-97	4.3253e-95	Mocos	chr18	+	24653691	24701556	2884	protein_coding	molybdenum_cofactor_sulfurase	1467	1568	1609	233	266	272	25.6405	26.4168	27.8717	4.07162	4.75431	4.81955
ENSMUSG00000000402	1242.46	123.402	3.2837	6.7494e-97	7.8635e-95	Egfl6	chrX	-	166523007	166585720	2704	protein_coding	EGF-like-domain_multiple_6	1278	1384	1426	153	114	76	23.8241	24.869	26.346	2.85162	2.1732	1.43628
ENSMUSG00000043286	1487.92	265.243	2.4687	1.4921e-96	1.7162e-94	Pnpla1	chr17	+	28858411	28890308	4483	protein_coding	patatin-like_phospholipase_domain_containing_1	1550	1640	1705	213	235	287	17.4283	17.7748	19.0002	2.39451	2.70209	3.27149
ENSMUSG00000004951	41514	9136.12	2.1706	1.5064e-96	1.7216e-94	Hspb1	chr5	+	135887919	135889563	930	protein_coding	heat_shock_protein_1	44095	46906	45517	6882	9183	9191	2390	2450.62	2445.08	372.94	508.982	505.025
ENSMUSG00000043782	1126.2	140.987	2.9636	7.3117e-93	8.0482e-91	Ccdc64b	chr17	+	23660523	23668610	1913	protein_coding	coiled-coil_domain_containing_64B	1229	1206	1268	98	132	160	32.3839	30.6311	33.1136	2.58177	3.5568	4.27403
ENSMUSG00000024331	4115.61	709.606	2.5136	1.3188e-91	1.4254e-89	Dsc2	chr18	-	20030633	20059554	4630	protein_coding	desmocollin_2	4542	4872	4109	614	528	830	49.4491	51.1277	44.3361	6.68335	5.87833	9.16073
ENSMUSG00000028378	5470.12	1188.12	2.1889	7.5012e-91	7.8706e-89	Ptgr1	chr4	-	58965439	58987119	2296	protein_coding	prostaglandin_reductase_1	5385	6169	6454	920	1217	1147	118.224	130.549	140.43	20.194	27.3225	25.5285
ENSMUSG00000075217	1338.73	261.859	2.3363	1.1001e-89	1.1279e-87	4833423E24Rik	chr2	-	85483594	85519024	2272	protein_coding	RIKEN_cDNA_4833423E24_gene	1472	1320	1611	246	242	238	32.6581	28.229	35.4233	5.45674	5.49045	5.35305
ENSMUSG00000027309	1457.63	288.127	2.3218	1.3971e-89	1.4242e-87	4930402H24Rik	chr2	-	130706200	130906406	6628	protein_coding	RIKEN_cDNA_4930402H24_gene	1634	1678	1477	270	284	244	12.4269	12.301	11.1327	2.053	2.2087	1.88122
ENSMUSG00000032348	4505.04	709.909	2.6404	3.9189e-89	3.9502e-87	Gsta4	chr9	+	78191966	78209348	957	protein_coding	glutathione_S-transferase_alpha_4	4775	5170	4869	479	761	719	251.509	262.487	254.173	25.2249	40.9896	38.3928
ENSMUSG00000068876	3280.58	764.591	2.0883	3.7376e-88	3.7256e-86	Cgn	chr3	-	94760069	94786492	5016	protein_coding	cingulin	3346	3670	3779	627	656	837	33.6249	35.5499	37.6376	6.29965	6.74136	8.52709
ENSMUSG00000001665	945.151	97.66	3.2262	4.0985e-86	3.9535e-84	Gstt3	chr10	-	75774115	75781414	1880	protein_coding	glutathione_S-transferase_theta_3	1152	1024	926	94	108	68	30.8878	26.465	24.6068	2.51986	2.96119	1.84835
ENSMUSG00000071019	2178.62	593.381	1.8673	9.1114e-86	8.7421e-84	Sdr16c6	chr4	-	4055929	4077522	1923	protein_coding	short_chain_dehydrogenase/reductase_family_16C_member_6	2377	2360	2426	506	547	591	62.3077	59.6297	63.0251	13.261	14.6625	15.7051
ENSMUSG00000051236	512.684	13.4101	5.0469	1.2426e-84	1.1552e-82	Msrb3	chr10	-	120781096	120899101	3843	protein_coding	methionine_sulfoxide_reductase_B3	509	551	628	12	16	9	6.67635	6.96644	8.16378	0.157368	0.21461	0.119675
ENSMUSG00000065954	1860.05	436.327	2.0789	4.5424e-83	4.137e-81	Tacc1	chr8	-	25154552	25201449	7695	protein_coding	transforming_acidic_coiled-coil_containing_protein_1	1943	2183	1991	358	414	436	12.7279	13.784	12.926	2.34467	2.77327	2.89542
ENSMUSG00000049848	2204.96	547.456	1.9985	4.6698e-82	4.1893e-80	Ceacam19	chr7	-	19875742	19887965	3361	protein_coding	carcinoembryonic_antigen-related_cell_adhesion_molecule_19	2185	2502	2571	455	537	523	32.7699	36.17	38.2152	6.82259	8.23582	7.95181
ENSMUSG00000000197	469.536	16.9247	4.6222	1.3018e-80	1.1506e-78	Nalcn	chr14	-	123276641	123627144	7115	protein_coding	sodium_leak_channel_non-selective	493	552	499	14	13	20	3.49272	3.76959	3.50371	0.0991653	0.0941823	0.143644
ENSMUSG00000040111	504.384	11.7027	5.1911	1.0527e-79	9.1247e-78	Gramd1b	chr9	-	40293233	40531383	7334	protein_coding	GRAM_domain_containing_1B	569	579	509	8	19	5	3.91078	3.8359	3.4672	0.0549738	0.133541	0.0348387
ENSMUSG00000042363	4955.99	1897.28	1.3812	8.031e-79	6.8615e-77	Lgalsl	chr11	-	20823576	20831056	3362	protein_coding	lectin_galactoside_binding-like	5187	5412	5705	1743	1759	1757	77.7697	78.215	84.7735	26.128	26.9693	26.7059
ENSMUSG00000018411	686.361	97.6557	2.7772	6.9689e-77	5.7356e-75	Mapt	chr11	+	104231390	104332090	5253	protein_coding	microtubule-associated_protein_tau	687	776	796	100	89	82	6.59237	7.17768	7.57021	0.959399	0.873341	0.7977
ENSMUSG00000028064	3393.09	1225.57	1.4638	7.7074e-77	6.3144e-75	Sema4a	chr3	-	88435959	88461182	3205	protein_coding	sema_domain_immunoglobulin_domain_(Ig)_transmembrane_domain_(TM)_and_short_cytoplasmic_domain_(semaphorin)_4A	3745	3612	3798	1168	1051	1183	58.9001	54.7582	59.201	18.3663	16.9035	18.8621
ENSMUSG00000026655	2376.16	602.43	1.9677	1.211e-76	9.7876e-75	Fam107b	chr2	+	3613758	3782142	3156	protein_coding	family_with_sequence_similarity_107_member_B	2430	2767	2620	483	563	622	38.8116	42.5992	41.4731	7.71288	9.19544	10.0713
ENSMUSG00000053559	2783.01	894.011	1.6309	3.7644e-74	2.9239e-72	Smagp	chr15	-	100621342	100636865	1132	protein_coding	small_cell_adhesion_glycoprotein	2934	3203	3015	796	774	910	130.649	137.48	133.059	35.4383	35.2448	41.0798
ENSMUSG00000038354	2801.19	952.07	1.5506	4.5578e-73	3.4651e-71	Ankrd35	chr3	+	96670131	96691009	3488	protein_coding	ankyrin_repeat_domain_35	3105	2948	3156	853	850	937	44.8722	41.0658	45.2025	12.3248	12.5616	13.7276
ENSMUSG00000014361	480.422	38.8523	3.5447	1.6335e-72	1.2263e-70	Mertk	chr2	+	128698956	128802894	4302	protein_coding	c-mer_proto-oncogene_tyrosine_kinase	496	577	507	37	30	41	5.8117	6.51681	5.88762	0.433449	0.359461	0.48702
ENSMUSG00000041235	1461.18	256.786	2.482	2.7544e-72	2.0506e-70	Chd7	chr4	+	8690406	8867659	10216	protein_coding	chromodomain_helicase_DNA_binding_protein_7	1601	1705	1496	187	230	294	7.89955	8.10911	7.31565	0.922502	1.16051	1.47062
ENSMUSG00000030257	1054.25	167.056	2.6269	3.0783e-72	2.2823e-70	Srgap3	chr6	-	112717971	112947266	8887	protein_coding	SLIT-ROBO_Rho_GTPase_activating_protein_3	1228	1254	979	136	169	157	6.96523	6.85602	5.50338	0.771242	0.98024	0.902771
ENSMUSG00000003847	8252.57	2547.85	1.6871	1.096e-71	8.0589e-70	Nfat5	chr8	+	107293470	107379517	13443	protein_coding	nuclear_factor_of_activated_T_cells_5	9094	9419	8609	2175	2153	2740	34.0997	34.0438	31.9933	8.15398	8.2556	10.4157
ENSMUSG00000039960	3337.05	943.66	1.8119	1.1455e-70	8.3548e-69	Rhou	chr8	+	123653929	123663884	3371	protein_coding	ras_homolog_gene_family_member_U	3478	3762	3737	750	874	989	52.0071	54.2238	55.3817	11.2127	13.3645	14.9924
ENSMUSG00000059708	702.407	66.6969	3.3314	1.3302e-70	9.6239e-69	Akap17b	chrX	-	36608314	36645395	6003	protein_coding	A_kinase_(PRKA)_anchor_protein_17B	744	790	776	36	68	80	6.24736	6.39423	6.45796	0.302232	0.583904	0.681012
ENSMUSG00000024588	3720.16	1439.51	1.3654	2.2579e-70	1.627e-68	Fech	chr18	-	64456550	64489066	2901	protein_coding	ferrochelatase	4007	4213	4011	1318	1313	1360	69.6247	70.5624	69.0728	22.8968	23.3302	23.9565
ENSMUSG00000025279	702.594	62.4955	3.4173	2.5061e-70	1.7986e-68	Dnase1l3	chr14	-	7964533	7994573	4747	protein_coding	deoxyribonuclease_1-like_3	763	774	773	36	52	85	8.10209	7.9223	8.13509	0.382199	0.564658	0.915024
ENSMUSG00000036687	673.844	103.259	2.6722	3.1115e-70	2.2241e-68	Tmem184a	chr5	-	139802485	139819917	4326	protein_coding	transmembrane_protein_184a	708	713	796	84	95	107	8.24971	8.00816	9.1924	0.978587	1.13198	1.26395
ENSMUSG00000035504	2084.12	658.381	1.6541	1.086e-69	7.5818e-68	Reep6	chr10	+	80329953	80336441	2208	protein_coding	receptor_accessory_protein_6	2236	2259	2359	592	559	676	51.0464	49.7104	53.3742	13.5123	13.0501	15.6452
ENSMUSG00000001313	758.436	136.128	2.45	1.0175e-68	6.9943e-67	Rnd2	chr11	+	101464999	101471853	1578	protein_coding	Rho_family_GTPase_2	783	866	846	122	110	146	25.0119	26.6649	26.7834	3.89636	3.59324	4.72802
ENSMUSG00000041757	2389.88	854.063	1.4783	9.2981e-68	6.2482e-66	Plekha6	chr1	+	133181321	133303435	7388	protein_coding	pleckstrin_homology_domain_containing_family_A_member_6	2551	2734	2573	843	742	786	17.4051	17.9805	17.3986	5.75052	5.177	5.43662
ENSMUSG00000055639	987.548	161.993	2.5774	8.8991e-67	5.9356e-65	Dach1	chr14	-	97786853	98169765	5219	protein_coding	dachshund_1_(Drosophila)	1059	1054	1135	111	175	161	10.2282	9.81258	10.8645	1.07187	1.72843	1.57642
ENSMUSG00000000296	891.189	155.918	2.4872	9.5096e-67	6.3193e-65	Tpd52l1	chr10	-	31332380	31445921	1267	protein_coding	tumor_protein_D52-like_1	874	1072	987	119	158	154	34.7718	41.11	38.9173	4.73344	6.42808	6.21122
ENSMUSG00000000416	908.955	173.868	2.3623	1.5718e-66	1.0406e-64	Cttnbp2	chr6	-	18366478	18514869	5905	protein_coding	cortactin_binding_protein_2	911	1065	1015	135	169	177	7.77661	8.76313	8.58714	1.15218	1.47526	1.53174
ENSMUSG00000033965	465.355	28.9431	3.8891	4.2418e-66	2.7878e-64	Slc16a2	chrX	-	103697414	103821965	4134	protein_coding	solute_carrier_family_16_(monocarboxylic_acid_transporters)_member_2	531	568	429	29	33	18	6.47465	6.67587	5.18429	0.353536	0.411476	0.222503
ENSMUSG00000039092	1620.77	506.3	1.6697	8.2719e-66	5.3969e-64	Sptlc3	chr2	+	139493913	139637674	2759	protein_coding	serine_palmitoyltransferase_long_chain_base_subunit_3	1773	1798	1757	451	449	504	32.3928	31.6641	31.8143	8.23818	8.38872	9.33495
ENSMUSG00000031870	487.468	42.2306	3.447	1.3755e-65	8.9418e-64	Pgr	chr9	+	8899833	8968611	6889	protein_coding	progesterone_receptor	433	611	562	38	40	39	3.16828	4.30938	4.07551	0.277993	0.299299	0.289295
ENSMUSG00000030340	894.119	196.101	2.1676	1.1095e-64	7.0842e-63	Scnn1a	chr6	+	125320659	125344943	3499	protein_coding	sodium_channel_nonvoltage-gated_1_alpha	967	977	996	185	153	207	13.9308	13.5669	14.2206	2.66461	2.25397	3.02315
ENSMUSG00000048455	1083.66	205.848	2.3713	1.6282e-64	1.0323e-62	Sprr1b	chr3	-	92436809	92438779	820	protein_coding	small_proline-rich_protein_1B	1152	1061	1353	159	210	200	70.8159	62.8682	82.4302	9.77215	13.201	12.4638
ENSMUSG00000032418	664.566	114.894	2.502	5.177e-64	3.2478e-62	Me1	chr9	-	86581371	86695953	3292	protein_coding	malic_enzyme_1_NADP(+)-dependent_cytosolic	706	778	701	104	116	98	10.8103	11.4828	10.638	1.59214	1.81635	1.52125
ENSMUSG00000025085	20088.9	8127.74	1.3011	8.4113e-63	5.1507e-61	Ablim1	chr19	-	57032733	57314919	7152	protein_coding	actin-binding_LIM_protein_1	21245	23113	21702	6966	7650	7896	149.734	157.021	151.591	49.0866	55.136	56.4173
ENSMUSG00000028894	1594.38	443.966	1.8312	2.2359e-62	1.3599e-60	Inpp5b	chr4	+	124741850	124801511	3834	protein_coding	inositol_polyphosphate-5-phosphatase_B	1744	1654	1845	422	345	467	22.9291	20.9611	24.0407	5.54711	4.6384	6.2244
ENSMUSG00000006390	4792.72	1812.79	1.397	4.0095e-62	2.4141e-60	Elovl1	chr4	+	118428093	118432953	1811	protein_coding	elongation_of_very_long_chain_fatty_acids_(FEN1/Elo2_SUR4/Elo3_yeast)-like_1	4838	5102	5837	1722	1531	1780	134.66	136.884	161.018	47.9205	43.577	50.2267
ENSMUSG00000040855	355.087	20.1877	3.9941	5.5844e-62	3.3398e-60	Reps2	chrX	-	162411954	162643649	7675	protein_coding	RALBP1_associated_Eps_domain_containing_protein_2	400	378	389	17	17	22	2.62708	2.393	2.53206	0.111629	0.114175	0.14648
ENSMUSG00000089804	2693.37	864.571	1.6307	9.0333e-62	5.3667e-60	Gm16136	chr15	-	37231921	37233309	1121	antisense	predicted_gene_16136	2598	3051	3220	753	769	875	116.822	132.241	143.5	33.8529	35.3608	39.8874
ENSMUSG00000028488	708.016	138.005	2.3337	2.283e-61	1.3474e-59	Sh3gl2	chr4	+	85205126	85639195	3231	protein_coding	SH3-domain_GRB2-like_2	750	826	752	116	134	132	11.7008	12.4215	11.6274	1.80937	2.13781	2.08771
ENSMUSG00000018796	10717.9	4518.4	1.2421	2.8406e-61	1.671e-59	Acsl1	chr8	+	46471041	46536051	5632	protein_coding	acyl-CoA_synthetase_long-chain_family_member_1	11573	11651	12020	4338	3683	4531	103.58	100.515	106.621	38.818	33.7086	41.1116
ENSMUSG00000032420	789.527	61.7611	3.5735	7.0049e-61	4.0806e-59	Nt5e	chr9	+	88327197	88372092	3995	protein_coding	5'_nucleotidase_ecto	757	630	1217	75	49	48	9.55149	7.6622	15.2186	0.946131	0.632238	0.613985
ENSMUSG00000013611	425.56	2.50603	6.4936	7.4713e-61	4.3242e-59	Snx31	chr15	-	36504062	36555573	2696	protein_coding	sorting_nexin_31	417	484	500	2	1	4	7.79665	8.72279	9.26515	0.0373867	0.0191197	0.0758181
ENSMUSG00000032827	464.178	54.4031	3.032	7.5232e-61	4.3403e-59	Ppp1r9a	chr6	+	4902917	5165661	9547	protein_coding	protein_phosphatase_1_regulatory_(inhibitor)_subunit_9A	476	539	512	46	44	61	2.51323	2.74316	2.6792	0.242827	0.237567	0.32651
ENSMUSG00000046971	5554.94	1361.94	2.0109	8.8712e-61	5.0852e-59	Pla2g4f	chr2	-	120299957	120314165	3116	protein_coding	phospholipase_A2_group_IVF	6373	5523	6361	1073	1109	1596	103.095	86.1207	101.984	17.3544	18.3457	26.1739
ENSMUSG00000030339	1900.13	678.645	1.4788	1.1523e-60	6.5844e-59	Ltbr	chr6	-	125306571	125313885	2107	protein_coding	lymphotoxin_B_receptor	1998	2111	2141	612	604	666	47.7995	48.6803	50.7638	14.6384	14.7766	16.1526
ENSMUSG00000032262	11097	3431.32	1.6833	5.5134e-60	3.1404e-58	Elovl4	chr9	-	83778692	83806277	3001	protein_coding	elongation_of_very_long_chain_fatty_acids_(FEN1/Elo2_SUR4/Elo3_yeast)-like_4	11811	12292	12392	2640	3163	3697	198.387	199.015	206.29	44.3348	54.3293	62.953
ENSMUSG00000028657	2456.43	892.786	1.4539	4.3278e-59	2.4342e-57	Ppt1	chr4	+	122836242	122859175	2573	protein_coding	palmitoyl-protein_thioesterase_1	2541	2711	2830	774	819	881	49.7802	51.194	54.9476	15.1603	16.4076	17.4972
ENSMUSG00000031093	1314.66	256.728	2.3306	8.2282e-59	4.5991e-57	Dock11	chrX	+	35888832	36076562	6665	protein_coding	dedicator_of_cytokinesis_11	1456	1520	1344	195	296	217	11.0117	11.0809	10.074	1.47449	2.28925	1.66377
ENSMUSG00000040964	1234.15	285.609	2.0925	9.533e-59	5.2954e-57	Arhgef10l	chr4	-	140514485	140666012	4531	protein_coding	Rho_guanine_nucleotide_exchange_factor_(GEF)_10-like	1274	1339	1448	213	276	301	14.1732	14.3587	15.9653	2.36915	3.1399	3.39473
ENSMUSG00000042073	940.981	248.987	1.9037	1.2763e-58	7.0244e-57	Abhd14b	chr9	+	106447788	106452922	1479	protein_coding	abhydrolase_domain_containing_14b	973	1037	1086	236	238	216	33.1617	34.0675	36.6829	8.04175	8.29487	7.46309
ENSMUSG00000000631	9619.58	4632.56	1.0517	3.1912e-58	1.7403e-56	Myo18a	chr11	+	77763246	77865980	7513	protein_coding	myosin_XVIIIA	10434	10595	10599	4271	4168	4408	70.0051	68.52	70.478	28.6499	28.5967	29.982
ENSMUSG00000055415	866.421	160.322	2.4047	1.1182e-57	5.9887e-56	Atp10b	chr11	+	43149877	43262285	6825	protein_coding	ATPase_class_V_type_10B	946	1048	853	120	165	158	6.98683	7.46085	6.24379	0.886105	1.24618	1.18301
ENSMUSG00000036225	3028.34	1227.33	1.2982	4.7043e-57	2.5121e-55	Kctd1	chr18	-	14968685	15151446	3456	protein_coding	potassium_channel_tetramerisation_domain_containing_1	3201	3512	3245	1129	1095	1180	46.6879	49.3754	46.9076	16.4637	16.3321	17.4478
ENSMUSG00000039145	1663.19	419.09	1.9723	1.5577e-56	8.1718e-55	Camk1d	chr2	-	5293457	5714515	6962	protein_coding	calcium/calmodulin-dependent_protein_kinase_ID	1781	1860	1828	308	429	421	12.895	12.981	13.1173	2.22958	3.17632	3.09016
ENSMUSG00000033060	5586.15	2201.61	1.3379	2.3487e-56	1.2286e-54	Lmo7	chr14	+	101729957	101934710	6092	protein_coding	LIM_domain_only_7	5936	6100	6337	1946	1862	2301	49.1163	48.6519	51.9668	16.0987	15.7551	19.3014
ENSMUSG00000033268	528.597	71.3518	2.8357	3.674e-56	1.9162e-54	Duox1	chr2	+	122315672	122347972	5267	protein_coding	dual_oxidase_1	472	622	648	63	60	75	4.51721	5.73795	6.1463	0.602815	0.587204	0.727664
ENSMUSG00000015702	307.622	11.8469	4.4614	6.3621e-56	3.3087e-54	Anxa9	chr3	-	95296096	95307176	1872	protein_coding	annexin_A9	323	333	356	10	7	16	8.69738	8.64307	9.5005	0.269216	0.192749	0.436764
ENSMUSG00000061126	3920.77	1210.78	1.684	1.5379e-55	7.8837e-54	Cyp4f39	chr17	+	32468462	32492479	1599	protein_coding	cytochrome_P450_family_4_subfamily_f_polypeptide_39	4282	4298	4310	1054	943	1366	134.986	130.601	134.658	33.2199	30.3993	43.6551
ENSMUSG00000031647	994.619	197.078	2.3062	2.1485e-55	1.0951e-53	Mfap3l	chr8	+	60632827	60676729	6335	protein_coding	microfibrillar-associated_protein_3-like	1175	1215	874	193	173	181	9.34939	9.31879	6.89235	1.53539	1.40767	1.46004
ENSMUSG00000072949	5423.27	1654.98	1.7013	5.2779e-55	2.6826e-53	Acot1	chr12	+	84009502	84017670	1559	protein_coding	acyl-CoA_thioesterase_1	6099	6051	5670	1311	1763	1498	197.199	188.587	181.693	42.3802	58.2918	49.1019
ENSMUSG00000021591	792.807	172.307	2.1788	9.8832e-55	4.995e-53	Glrx	chr13	+	75839868	75850151	1345	protein_coding	glutaredoxin	826	820	963	164	176	137	30.9563	29.6225	35.769	6.14509	6.74515	5.20513
ENSMUSG00000082361	329.155	20.1384	3.8793	1.1599e-54	5.8292e-53	Btc	chr5	-	91357261	91402994	2876	protein_coding	betacellulin_epidermal_growth_factor_family_member	315	372	397	17	14	25	5.52095	6.28469	6.8961	0.297897	0.250923	0.444206
ENSMUSG00000005802	1814.94	584.61	1.6241	1.9114e-54	9.5792e-53	Slc30a4	chr2	-	122681233	122702663	5458	protein_coding	solute_carrier_family_30_(zinc_transporter)_member_4	2067	2120	1774	550	515	557	19.0897	18.8726	16.2376	5.0785	4.86379	5.215
ENSMUSG00000024036	524.535	46.2697	3.4018	2.4343e-54	1.2166e-52	Slc37a1	chr17	+	31295483	31350696	3354	protein_coding	solute_carrier_family_37_(glycerol-3-phosphate_transporter)_member_1	483	480	767	55	33	41	7.25899	6.95357	11.4244	0.82643	0.507168	0.624675
ENSMUSG00000044626	452.593	44.9694	3.2506	3.1542e-54	1.5677e-52	Liph	chr16	-	21953826	21995542	3793	protein_coding	lipase_member_H	474	488	527	24	47	53	6.29923	6.25125	6.94113	0.318886	0.638728	0.714046
ENSMUSG00000039116	308.853	17.9237	3.9398	2.0448e-53	1.0079e-51	Gpr126	chr10	-	14402585	14545036	6505	protein_coding	G_protein-coupled_receptor_126	313	372	331	21	12	17	2.42543	2.7786	2.54204	0.162697	0.09509	0.133547
ENSMUSG00000038936	378.087	33.0982	3.4106	4.5353e-53	2.2112e-51	Sccpdh	chr1	+	179668210	179687189	3561	protein_coding	saccharopine_dehydrogenase_(putative)	407	366	471	40	30	22	5.76122	4.99389	6.60771	0.566102	0.43426	0.315707
ENSMUSG00000020905	748.803	175.462	2.0714	8.5047e-53	4.113e-51	Usp43	chr11	-	67854523	67922153	4462	protein_coding	ubiquitin_specific_peptidase_43	753	870	841	156	146	185	8.50663	9.4737	9.41605	1.76198	1.68665	2.11873
ENSMUSG00000020585	10080.5	5017.57	1.0041	1.1359e-52	5.4787e-51	Laptm4a	chr12	+	8921664	8938742	1773	protein_coding	lysosomal-associated_protein_transmembrane_4A	10667	11156	11332	4660	4395	4866	303.267	305.724	319.301	132.46	127.777	140.248
ENSMUSG00000040127	313.662	17.7557	3.9739	3.5073e-51	1.6517e-49	Sdr9c7	chr10	+	127898518	127911761	2868	protein_coding	4short_chain_dehydrogenase/reductase_family_9C_member_7	344	286	402	14	20	15	6.04604	4.84525	7.00244	0.246012	0.359461	0.267267
ENSMUSG00000028749	6876.89	2531.56	1.4346	3.8698e-51	1.8128e-49	Pla2g2f	chr4	-	138750533	138757626	2465	protein_coding	phospholipase_A2_group_IIF	7453	7218	7945	2061	2564	2376	152.407	142.275	161.02	42.1374	53.617	49.2564
ENSMUSG00000020181	537.719	94.7434	2.4652	1.7874e-50	8.2232e-49	Nav3	chr10	-	109682660	110456204	8561	protein_coding	neuron_navigator_3	610	641	515	92	82	89	3.59168	3.638	3.00528	0.541589	0.493731	0.531249
ENSMUSG00000021281	329.262	19.1865	3.9342	1.9195e-50	8.8083e-49	Tnfaip2	chr12	+	111442469	111455018	3889	protein_coding	tumor_necrosis_factor_alpha-induced_protein_2	333	341	410	22	24	7	4.31617	4.26036	5.26682	0.285096	0.318108	0.0919799
ENSMUSG00000029377	349.579	23.0018	3.7736	3.0322e-50	1.3738e-48	Ereg	chr5	+	91074617	91093649	4136	protein_coding	epiregulin	345	314	493	23	17	24	4.20466	3.68875	5.95482	0.280255	0.21187	0.296527
ENSMUSG00000059288	2314.69	868.82	1.4068	5.3302e-50	2.4029e-48	Cdyl	chr13	+	35659862	35874064	3575	protein_coding	chromodomain_protein_Y_chromosome-like	2532	2713	2362	777	822	808	35.7009	36.8726	33.007	10.9535	11.8521	11.5496
ENSMUSG00000022964	3020.56	1209.26	1.3152	1.1047e-49	4.9183e-48	Tmem50b	chr16	-	91574503	91597800	2347	protein_coding	transmembrane_protein_50B	3015	3405	3522	1053	1133	1164	64.7539	70.491	74.9684	22.6111	24.8839	25.3439
ENSMUSG00000028125	279.89	14.8179	4.0482	2.9522e-49	1.3015e-47	Abca4	chr3	+	122044443	122180061	7265	protein_coding	ATP-binding_cassette_sub-family_A_(ABC1)_member_4	261	321	340	11	14	16	1.81091	2.14684	2.33801	0.0763069	0.099333	0.112543
ENSMUSG00000040596	4061.7	1741.76	1.2172	3.4781e-49	1.5295e-47	Pogk	chr1	-	166384622	166409863	7368	protein_coding	pogo_transposable_element_with_KRAB_domain	4261	4473	4627	1514	1678	1631	29.151	29.4971	31.3727	10.3558	11.7393	11.3119
ENSMUSG00000024953	4476.94	1930.6	1.2092	4.5601e-49	1.9956e-47	Prdx5	chr19	-	6906697	6910106	1826	protein_coding	peroxiredoxin_5	4659	5108	4959	1729	1884	1733	128.613	135.919	135.674	47.7201	53.184	48.4988
ENSMUSG00000027224	508.511	78.7032	2.6404	4.8215e-49	2.1048e-47	Duoxa1	chr2	-	122302191	122313730	2467	protein_coding	dual_oxidase_maturation_factor_1	463	558	655	83	60	76	9.46028	10.9899	13.264	1.69557	1.25367	1.57426
ENSMUSG00000000594	1184.08	370.228	1.6657	4.2275e-48	1.8233e-46	Gm2a	chr11	+	55098115	55113029	4127	protein_coding	GM2_ganglioside_activator_protein	1218	1381	1296	307	353	365	14.8766	16.2588	15.6882	3.74896	4.40901	4.51951
ENSMUSG00000020432	2100	827.025	1.3381	4.4383e-48	1.9096e-46	Tcn2	chr11	-	3917192	3932159	2027	protein_coding	transcobalamin_2	2261	2400	2243	729	738	826	56.2262	57.5291	55.2812	18.1251	18.7674	20.8238
ENSMUSG00000060962	60877.5	29640.1	1.0354	9.9524e-48	4.2617e-46	Dmkn	chr7	+	30763756	30781063	2063	protein_coding	dermokine	65928	66021	68229	25782	27208	29147	1610.88	1554.94	1652.24	629.831	679.827	721.984
ENSMUSG00000056973	280.076	4.02036	5.5069	1.4466e-47	6.1799e-46	Ces1d	chr8	-	93166068	93197838	2004	protein_coding	carboxylesterase_1D	303	368	249	2	6	3	7.62144	8.92236	6.20732	0.0502966	0.154331	0.0764991
ENSMUSG00000070604	787.413	148.482	2.3696	6.2663e-47	2.6392e-45	Vsig10l	chr7	+	43463151	43471913	3730	protein_coding	ZV-set_and_immunoglobulin_domain_containing_10_like	816	711	1066	126	123	163	11.0274	9.2617	14.2774	1.70243	1.6998	2.23312
ENSMUSG00000050296	9585.69	697.152	3.6385	1.9932e-46	8.259e-45	Abca12	chr1	-	71242276	71414910	9137	protein_coding	ATP-binding_cassette_sub-family_A_(ABC1)_member_12	10748	11063	9682	457	627	845	59.2947	58.83	52.9375	2.52069	3.53724	4.72592
ENSMUSG00000008540	7483.4	889.636	2.9943	3.9051e-46	1.6144e-44	Mgst1	chr6	+	138140316	138156755	1167	protein_coding	microsomal_glutathione_S-transferase_1	8624	8932	7015	664	789	1011	372.503	371.884	300.303	28.675	34.8504	44.2704
ENSMUSG00000029217	669.401	163.216	2.0123	1.7226e-45	7.0245e-44	Tec	chr5	-	72755718	72868483	2665	protein_coding	tec_protein_tyrosine_kinase	730	786	684	145	136	172	13.8076	14.3303	12.8222	2.74206	2.63053	3.2981
ENSMUSG00000069516	442.132	72.8476	2.5528	2.6807e-45	1.0906e-43	Lyz2	chr10	-	117277334	117282274	1266	protein_coding	lysozyme_2	531	442	479	75	70	57	21.1423	16.9636	18.9018	2.98562	2.85013	2.30078
ENSMUSG00000022754	2457.71	685.502	1.8245	2.8821e-45	1.1673e-43	Tmem45a	chr16	-	56805161	56886166	2701	protein_coding	transmembrane_protein_45a	3078	2894	2087	662	611	629	57.4429	52.0599	38.6011	12.3521	11.6605	11.9003
ENSMUSG00000030484	437.487	29.6205	3.7237	5.3881e-45	2.1724e-43	Lypd5	chr7	+	24349224	24353833	935	protein_coding	Ly6/Plaur_domain_containing_5	632	429	371	16	24	42	34.072	22.2934	19.8228	0.862413	1.32312	2.29547
ENSMUSG00000072214	4621.32	1877.01	1.2937	5.5378e-45	2.2278e-43	44079	chr16	-	18621811	18629938	2127	protein_coding	septin_5	4882	5043	5276	1588	1623	1994	115.697	115.2	123.919	37.6261	39.3325	47.9061
ENSMUSG00000028494	688.438	173.865	1.9649	6.752e-45	2.7102e-43	Plin2	chr4	-	86648386	86670060	1888	protein_coding	perilipin_2	698	740	828	151	177	153	18.6357	19.0441	21.9094	4.03071	4.8325	4.14116
ENSMUSG00000034112	578.425	119.796	2.241	7.1477e-45	2.8562e-43	Atp2c2	chr8	+	119700009	119757718	3223	protein_coding	ATPase_Ca++_transporting_type_2C_member_2	618	585	700	100	129	102	9.66541	8.81912	10.8503	1.56367	2.06315	1.61723
ENSMUSG00000021468	2708.46	1226.07	1.139	2.1539e-44	8.5123e-43	Sptlc1	chr13	-	53332716	53377365	2606	protein_coding	serine_palmitoyltransferase_long_chain_base_subunit_1	2898	3043	2965	1145	1048	1210	56.0552	56.7358	56.8398	22.1431	20.7295	23.7271
ENSMUSG00000031150	2220.08	946.397	1.2248	5.156e-44	2.0155e-42	Ccdc120	chrX	-	7731714	7750905	3658	protein_coding	coiled-coil_domain_containing_120	2479	2319	2500	909	882	833	34.1605	30.8026	34.1428	12.5235	12.4287	11.6368
ENSMUSG00000038600	676.599	134.899	2.2893	6.2555e-44	2.4399e-42	Atp6v0a4	chr6	-	38048483	38124586	3307	protein_coding	ATPase_H+_transporting_lysosomal_V0_subunit_A4	754	789	680	115	97	163	11.4929	11.5924	10.2725	1.75255	1.51195	2.51876
ENSMUSG00000059554	733.238	206.842	1.809	9.0489e-44	3.5079e-42	Ccdc28a	chr10	-	18213676	18234998	2255	protein_coding	coiled-coil_domain_containing_28A	748	805	860	176	192	205	16.7204	17.3452	19.0526	3.93344	4.3889	4.64558
ENSMUSG00000005886	2294.6	947.794	1.2697	9.5095e-44	3.6692e-42	Ncoa2	chr1	-	13139105	13374083	8171	protein_coding	nuclear_receptor_coactivator_2	2520	2658	2363	847	870	910	15.546	15.8055	14.4474	5.22414	5.48839	5.69114
ENSMUSG00000019969	5682.07	2498.94	1.1803	1.045e-43	4.0233e-42	Psen1	chr12	+	83688203	83735199	3023	protein_coding	presenilin_1	6089	6481	6112	2188	2147	2597	101.531	104.168	101.006	36.4767	36.6096	43.9002
ENSMUSG00000031596	1033.98	233.342	2.1186	1.4137e-43	5.4312e-42	Slc7a2	chr8	+	40862396	40922308	7910	protein_coding	solute_carrier_family_7_(cationic_amino_acid_transporter_y+_system)_member_2	1125	1236	1037	187	176	285	7.16916	7.59227	6.54944	1.19144	1.14693	1.8412
ENSMUSG00000011884	35853.1	17251	1.052	6.0154e-43	2.2818e-41	Gltp	chr5	-	114669403	114690984	1757	protein_coding	glycolipid_transfer_protein	39301	39952	38602	14856	16611	16299	1127.52	1104.83	1097.59	426.125	487.332	474.048
ENSMUSG00000091376	964.697	256.689	1.8894	9.9205e-43	3.7315e-41	Aadacl2	chr3	+	60006743	60025420	1590	protein_coding	arylacetamide_deacetylase-like_2	1074	1032	1065	204	211	297	34.0486	31.5364	33.4622	6.46606	6.84048	9.54536
ENSMUSG00000048911	496.065	95.1411	2.3442	2.0732e-42	7.7174e-41	Rnf24	chr2	-	131298064	131352892	5978	protein_coding	ring_finger_protein_24	546	589	495	72	96	95	4.60393	4.78728	4.13668	0.606992	0.827783	0.812084
ENSMUSG00000039206	568.453	136.751	2.03	2.7807e-42	1.033e-40	Daglb	chr5	+	143464493	143504442	3214	protein_coding	diacylglycerol_lipase_beta	620	616	633	112	121	146	9.72384	9.31246	9.83921	1.75622	1.94062	2.32135
ENSMUSG00000049076	3893.68	1718.56	1.1751	5.6858e-42	2.0948e-40	Acap2	chr16	-	31092413	31201238	6493	protein_coding	ArfGAP_with_coiled-coil_ankyrin_repeat_and_PH_domains_2	4338	4336	4122	1472	1596	1693	33.6772	32.4469	31.715	11.4253	12.6703	13.3243
ENSMUSG00000040713	1122.24	428.088	1.382	1.7565e-41	6.4053e-40	Creg1	chr1	+	165763746	165775308	2317	protein_coding	cellular_repressor_of_E1A-stimulated_genes_1	1200	1274	1216	416	378	394	26.1064	26.7161	26.2186	9.04845	8.40943	8.68967
ENSMUSG00000027737	5377.53	365.271	3.7069	2.4823e-41	9.0156e-40	Slc7a11	chr3	-	50364936	50443613	9227	protein_coding	solute_carrier_family_7_(cationic_amino_acid_transporter_y+_system)_member_11	5733	6006	5945	215	353	441	31.3194	31.6267	32.188	1.17432	1.97204	2.44237
ENSMUSG00000037419	632.895	126.341	2.2854	4.7515e-41	1.7084e-39	Endod1	chr9	-	14353990	14381242	4470	protein_coding	endonuclease_domain_containing_1	647	743	692	101	92	158	7.29607	8.07627	7.73394	1.13873	1.06092	1.80627
ENSMUSG00000010825	221.428	8.31596	4.4085	8.9893e-41	3.2001e-39	Grid2ip	chr5	+	143357338	143392152	3865	protein_coding	glutamate_receptor_ionotropic_delta_2_(Grid2)_interacting_protein_1	232	204	293	8	9	6	3.02573	2.56455	3.78722	0.104315	0.120031	0.0793295
ENSMUSG00000036880	13043.2	6106.62	1.0908	1.105e-40	3.9103e-39	Acaa2	chr18	+	74779197	74806207	1515	protein_coding	acetyl-Coenzyme_A_acyltransferase_2_(mitochondrial_3-oxoacyl-Coenzyme_A_thiolase)	13915	14962	14009	5194	5923	5788	462.98	479.851	461.952	172.781	201.526	195.231
ENSMUSG00000037577	703.785	191.175	1.8606	1.6491e-40	5.8017e-39	Ephx3	chr17	-	32183770	32189549	2416	protein_coding	epoxide_hydrolase_3	790	758	765	150	184	195	16.4825	15.2441	15.8186	3.12897	3.92574	4.12449
ENSMUSG00000042510	528.772	86.4152	2.555	2.8137e-40	9.8794e-39	AA986860	chr1	+	130731976	130744622	3205	protein_coding	expressed_sequence_AA986860	547	499	695	89	53	99	8.60303	7.56488	10.8333	1.39949	0.852411	1.57848
ENSMUSG00000053550	583.716	129.256	2.1435	7.3494e-40	2.5604e-38	Shisa7	chr7	-	4825552	4844696	6006	protein_coding	shisa_family_member_7	536	618	770	113	123	122	4.49854	4.99957	6.40483	0.9482	1.05565	1.03802
ENSMUSG00000078144	2804.92	1188.59	1.2322	8.4402e-40	2.9235e-38	Capns2	chr8	+	92901407	92902407	1001	protein_coding	calpain_small_subunit_2	3123	3259	2834	1204	976	1123	157.264	158.19	141.439	60.6176	50.2593	57.3296
ENSMUSG00000017491	235.583	14.0354	3.8544	1.3582e-39	4.6863e-38	Rarb	chr14	-	16430842	16575472	3034	protein_coding	retinoic_acid_receptor_beta	206	315	255	15	12	12	3.4225	5.04458	4.19882	0.249162	0.203876	0.202115
ENSMUSG00000060716	737.718	172.651	2.0672	2.3427e-39	8.0521e-38	Plekhh1	chr12	+	79029163	79081648	6432	protein_coding	pleckstrin_homology_domain_containing_family_H_(with_MyTH4_domain)_member_1	858	738	828	121	175	181	6.72409	5.57494	6.43112	0.948082	1.40247	1.43802
ENSMUSG00000091811	2136.6	928.871	1.1961	4.2296e-39	1.44e-37	Prr24	chr7	-	16272014	16273692	1679	protein_coding	InaF_motif_containing_1	2155	2308	2570	929	828	821	64.6977	66.7905	76.4689	27.8851	25.4203	24.9877
ENSMUSG00000021665	1316.43	492.054	1.411	4.9501e-39	1.6789e-37	Hexb	chr13	-	97176332	97198357	1904	protein_coding	hexosaminidase_B	1351	1502	1478	411	455	497	35.7668	38.3295	38.7802	10.8788	12.3181	13.339
ENSMUSG00000064373	2219.09	755.612	1.5421	6.1691e-39	2.0845e-37	Sepp1	chr15	+	3268547	3280508	2084	protein_coding	selenoprotein_P_plasma_1	2782	2308	2191	725	748	620	67.2901	53.8106	52.5227	17.5326	18.5014	15.2029
ENSMUSG00000021366	3759.22	1590.52	1.2347	1.9127e-38	6.3907e-37	Hivep1	chr13	+	42052021	42185026	8753	protein_coding	human_immunodeficiency_virus_type_I_enhancer_binding_protein_1	4167	4393	3792	1346	1475	1585	23.9971	24.3856	21.6428	7.74988	8.68633	9.25349
ENSMUSG00000021303	259.941	8.69115	4.5218	2.054e-38	6.8499e-37	Gng4	chr13	+	13784059	13827897	3180	protein_coding	guanine_nucleotide_binding_protein_(G_protein)_gamma_4	205	231	423	4	8	12	3.24952	3.52951	6.64531	0.0633927	0.129677	0.192836
ENSMUSG00000026271	230.161	15.2424	3.7253	2.6537e-38	8.8171e-37	Gpr35	chr1	+	92950865	92986391	4214	protein_coding	G_protein-coupled_receptor_35	221	257	280	7	16	19	2.64356	2.96325	3.31945	0.0837163	0.195716	0.230405
ENSMUSG00000025934	506.339	91.067	2.4281	3.1653e-38	1.0478e-36	Gsta3	chr1	+	21240589	21265661	2792	protein_coding	glutathione_S-transferase_alpha_3	607	567	488	67	107	77	10.9589	9.86728	8.73186	1.20939	1.97547	1.40932
ENSMUSG00000000320	2668.27	1024.98	1.3717	5.0596e-38	1.6657e-36	Alox12	chr11	-	70241457	70255353	3001	protein_coding	arachidonate_12-lipoxygenase	2895	2999	2878	812	930	1097	48.6267	48.5557	47.9101	13.6363	15.9742	18.6799
ENSMUSG00000039385	215.863	1.07381	6.0521	7.604e-38	2.4942e-36	Cdh6	chr15	-	13034200	13173639	2632	protein_coding	cadherin_6	189	224	299	2	1	0	3.61966	4.13516	5.67528	0.0382958	0.0195846	0
ENSMUSG00000031278	898.726	226.378	1.9636	8.6303e-38	2.8154e-36	Acsl4	chrX	-	142317993	142390535	5280	protein_coding	acyl-CoA_synthetase_long-chain_family_member_4	1131	974	843	174	225	227	10.7974	8.96303	7.9762	1.66082	2.19659	2.19697
ENSMUSG00000031530	838.105	211.846	1.9587	1.3089e-37	4.2545e-36	Dusp4	chr8	+	34807297	34819894	2740	protein_coding	dual_specificity_phosphatase_4	947	980	826	152	201	233	17.4217	17.3782	15.0602	2.79576	3.78135	4.34549
ENSMUSG00000043587	415.631	90.6808	2.1597	1.3813e-37	4.4817e-36	Pxylp1	chr9	-	96823336	96892669	3189	protein_coding	2-phosphoxylose_phosphatase_1	449	433	485	97	77	78	7.09715	6.59725	7.59783	1.53294	1.24462	1.24989
ENSMUSG00000021054	4873.48	2372.14	1.0351	1.4569e-37	4.7184e-36	Sgpp1	chr12	-	75714248	75735729	3324	protein_coding	sphingosine-1-phosphate_phosphatase_1	5300	5353	5370	2038	2220	2313	80.3724	78.2467	80.7078	30.8994	34.4265	35.5588
ENSMUSG00000028381	2579.69	1068.63	1.2643	1.5081e-37	4.8754e-36	Ugcg	chr4	+	59189257	59222833	4012	protein_coding	UDP-glucose_ceramide_glucosyltransferase	2637	2912	2939	953	869	1145	33.1315	35.2663	36.5966	11.9712	11.165	14.584
ENSMUSG00000033508	11818.9	5008.72	1.2323	1.7013e-37	5.4899e-36	Asprv1	chr6	+	86628174	86629702	1529	protein_coding	aspartic_peptidase_retroviral-like_1	12993	12624	13240	4243	5278	4325	428.345	401.161	432.596	139.853	177.936	144.548
ENSMUSG00000029304	211.431	7.8426	4.3814	1.869e-37	6.0097e-36	Spp1	chr5	+	104435118	104441050	1507	protein_coding	secreted_phosphoprotein_1	272	180	242	10	3	9	9.09804	5.80349	8.0224	0.334421	0.102615	0.305184
ENSMUSG00000022240	398.73	58.9807	2.6886	2.2408e-37	7.1795e-36	Ctnnd2	chr15	+	30172593	31029311	5914	protein_coding	catenin_(cadherin_associated_protein)_delta_2	413	497	401	36	56	71	3.52015	4.08324	3.38739	0.306781	0.488099	0.613494
ENSMUSG00000074899	265.594	27.3138	3.1602	2.9387e-37	9.382e-36	Sptbn5	chr2	-	120046157	120085772	3625	protein_coding	spectrin_beta_non-erythrocytic_5	289	239	346	29	21	26	4.01867	3.20346	4.76837	0.403178	0.298615	0.366521
ENSMUSG00000039347	274.468	38.9592	2.7413	4.1613e-37	1.3238e-35	Atp6v0e2	chr6	+	48537569	48541798	1832	protein_coding	ATPase_H+_transporting_lysosomal_V0_subunit_E2	288	293	322	36	36	36	7.92427	7.77091	8.78077	0.990339	1.01293	1.00418
ENSMUSG00000074183	404.387	56.4289	2.7688	4.8068e-37	1.5264e-35	Gsta1	chr9	+	78230656	78242684	875	protein_coding	glutathione_S-transferase_alpha_1_(Ya)	454	437	438	32	73	50	26.1541	24.2663	25.0074	1.8431	4.30047	2.92008
ENSMUSG00000027878	5597.17	2291.33	1.281	6.1502e-37	1.9462e-35	Notch2	chr3	+	98013538	98150367	10506	protein_coding	notch_2	6495	6394	5491	2016	1910	2433	31.1626	29.5709	26.1106	9.67074	9.37124	11.8342
ENSMUSG00000025277	830.88	294.75	1.4841	6.2323e-37	1.9686e-35	Abhd6	chr14	+	8002902	8056555	2018	protein_coding	abhydrolase_domain_containing_6	845	942	947	266	271	280	21.107	22.6809	23.444	6.64304	6.92228	7.09039
ENSMUSG00000037949	1128.15	375.77	1.5734	7.5929e-37	2.3942e-35	Ano10	chr9	-	122175879	122294374	2599	protein_coding	anoctamin_10	1201	1194	1316	291	377	371	23.2932	22.3217	25.296	5.64278	7.47715	7.29459
ENSMUSG00000085124	271.286	30.6268	3.0397	8.217e-37	2.5865e-35	Gm12766	chr7	+	34438137	34520885	1823	lincRNA	predicted_gene_12766	334	308	248	28	26	31	9.23532	8.20907	6.79622	0.774066	0.73517	0.868977
ENSMUSG00000024413	1622.88	651.456	1.309	8.6695e-37	2.7241e-35	Npc1	chr18	-	12189693	12236400	5756	protein_coding	Niemann-Pick_type_C1	1844	1855	1632	576	587	643	16.1485	15.6586	14.1645	5.04323	5.25676	5.70852
ENSMUSG00000028115	2333.89	1147.01	1.0213	1.4604e-36	4.5489e-35	Bnipl	chr3	-	95241271	95251193	1810	protein_coding	BCL2/adenovirus_E1B_19kD_interacting_protein_like	2444	2608	2625	1069	1057	1054	68.0636	70.0098	72.4524	29.765	30.1021	29.7574
ENSMUSG00000052302	192.659	10.8052	3.9072	1.6766e-36	5.2044e-35	Tbc1d30	chr10	-	121263824	121311189	5691	protein_coding	TBC1_domain_family_member_30	219	211	203	12	10	8	1.93976	1.80146	1.78201	0.106267	0.0905759	0.0718347
ENSMUSG00000055976	294.731	36.1049	2.9344	1.7716e-36	5.4897e-35	Cldn23	chr8	-	35824709	35826559	1851	protein_coding	claudin_23	312	284	374	25	31	44	8.4965	7.4549	10.0941	0.680676	0.863289	1.21473
ENSMUSG00000003863	3834.82	1738.31	1.1361	1.9751e-36	6.1099e-35	Ppfia3	chr7	-	45339126	45367019	4893	protein_coding	protein_tyrosine_phosphatase_receptor_type_f_polypeptide_(PTPRF)_interacting_protein_(liprin)_alpha_3	4227	4045	4336	1552	1444	1829	43.5461	40.1673	44.2707	15.9854	15.2122	19.1017
ENSMUSG00000031488	546.284	147.275	1.8668	2.4508e-36	7.5553e-35	Rab11fip1	chr8	-	27138773	27174646	7965	protein_coding	RAB11_family_interacting_protein_1_(class_I)	591	614	591	132	118	159	3.74019	3.74552	3.70684	0.835208	0.763655	1.0201
ENSMUSG00000043300	274.118	36.9597	2.8098	6.6942e-36	2.0254e-34	B3galnt1	chr3	-	69574186	69598861	1901	protein_coding	UDP-GalNAc:betaGlcNAc_beta_13-galactosaminyltransferase_polypeptide_1	277	315	310	30	42	30	7.34496	8.05115	8.1467	0.795327	1.13885	0.80644
ENSMUSG00000013483	3317.57	1471.11	1.1675	6.7341e-36	2.0341e-34	Card14	chr11	+	119307768	119345375	4206	protein_coding	caspase_recruitment_domain_family_member_14	3451	3488	3978	1300	1244	1538	41.3588	40.2937	47.2496	15.5769	15.2459	18.6862
ENSMUSG00000056605	230.428	4.30434	5.0667	1.0156e-35	3.0573e-34	Krt72	chr15	-	101776172	101786458	1951	protein_coding	keratin_72	175	190	397	3	2	7	4.5214	4.7318	10.1657	0.0774945	0.0528413	0.183347
ENSMUSG00000026452	196.952	7.47687	4.3361	1.3033e-35	3.9102e-34	Syt2	chr1	+	134646677	134762593	6879	protein_coding	synaptotagmin_II	213	189	246	7	1	13	1.5608	1.33495	1.78654	0.0512837	0.00749334	0.096572
ENSMUSG00000070476	245.208	25.9819	3.1188	1.7368e-35	5.1935e-34	Fam217b	chr2	+	178414524	178424428	4541	protein_coding	family_with_sequence_similarity_217_member_B	258	242	307	19	22	31	2.86392	2.58937	3.37745	0.210867	0.249731	0.348854
ENSMUSG00000059325	376.1	74.2404	2.2947	2.2629e-35	6.7554e-34	Hopx	chr5	-	77086988	77115121	1261	protein_coding	HOP_homeobox	416	361	460	66	63	77	16.6292	13.9098	18.2241	2.63776	2.57529	3.12039
ENSMUSG00000022415	851.393	319.069	1.4058	2.8709e-35	8.5282e-34	Syngr1	chr15	+	80091334	80119501	4180	protein_coding	synaptogyrin_1	901	958	941	291	282	312	10.8653	11.1357	11.2465	3.50852	3.47755	3.81427
ENSMUSG00000033792	1257.16	429.183	1.5368	8.2414e-35	2.428e-33	Atp7a	chrX	+	106027276	106124926	4900	protein_coding	ATPase_Cu++_transporting_alpha_polypeptide	1459	1453	1216	361	373	456	15.009	14.4079	12.3977	3.71294	3.92386	4.75556
ENSMUSG00000046805	257.714	25.3331	3.2034	1.1643e-34	3.4247e-33	Mpeg1	chr19	+	12460779	12465284	4335	protein_coding	macrophage_expressed_gene_1	292	268	287	38	14	19	3.39536	3.00383	3.30746	0.441775	0.166472	0.223974
ENSMUSG00000000538	1712.72	789.896	1.1117	2.3577e-34	6.8784e-33	Tom1l2	chr11	-	60226714	60352905	4999	protein_coding	target_of_myb1-like_2_(chicken)	1818	1822	1994	720	740	729	18.3317	17.709	19.9271	7.25865	7.63044	7.45208
ENSMUSG00000026824	173.461	1.79028	5.4823	4.2686e-34	1.2373e-32	Kcnj3	chr2	+	55435970	55598145	5215	protein_coding	potassium_inwardly-rectifying_channel_subfamily_J_member_3	203	167	200	0	0	5	1.96216	1.55594	1.91592	0	0	0.0489947
ENSMUSG00000023968	167.777	5.06133	4.5649	1.0676e-33	3.0697e-32	Crip3	chr17	+	46428926	46431776	1035	protein_coding	cysteine-rich_protein_3	183	157	212	4	5	5	8.91257	7.37037	10.2329	0.194772	0.249018	0.246867
ENSMUSG00000040875	262.903	26.2495	3.185	1.1416e-33	3.2773e-32	Osbpl10	chr9	+	114978569	115232225	2766	protein_coding	oxysterol_binding_protein-like_10	304	325	234	20	17	36	5.54005	5.70901	4.22635	0.364405	0.316809	0.665094
ENSMUSG00000056078	5232.02	772.838	2.68	1.9171e-33	5.4859e-32	Lipm	chr19	+	34100943	34122687	2701	protein_coding	lipase_family_member_M	5585	5453	6173	722	509	921	104.229	98.0936	114.176	13.4716	9.71391	17.4248
ENSMUSG00000067825	1623.14	675.658	1.2573	2.3192e-33	6.6048e-32	Pex26	chr6	+	121183667	121198837	4093	protein_coding	peroxisomal_biogenesis_factor_26	1587	1829	1928	622	667	582	19.5446	21.7121	23.5325	7.6587	8.40011	7.26632
ENSMUSG00000024972	808.469	252.804	1.6582	2.7433e-33	7.8004e-32	Lgals12	chr19	-	7596660	7607193	2757	protein_coding	lectin_galactose_binding_soluble_12	834	831	996	240	189	274	15.2483	14.6452	18.0478	4.38714	3.53367	5.07863
ENSMUSG00000078486	1815.63	620.384	1.5345	3.0788e-33	8.7405e-32	Perm1	chr4	+	156215868	156221307	3901	protein_coding	PPARGC1_and_ESRR_induced_regulator_muscle_1	1962	1727	2285	578	462	685	25.3522	21.5103	29.2626	7.46721	6.10474	8.97321
ENSMUSG00000005986	787.833	250.205	1.6368	3.1953e-33	9.0426e-32	Ankrd13d	chr19	-	4270180	4283137	2139	protein_coding	ankyrin_repeat_domain_13_family_member_D	865	789	937	224	197	274	20.3844	17.9224	21.8842	5.27769	4.74741	6.54595
ENSMUSG00000047501	17476.4	8010.72	1.1199	3.8489e-33	1.0875e-31	Cldn4	chr5	-	134945126	134946934	1809	protein_coding	claudin_4	17809	20440	19246	6445	7497	8238	496.241	549	531.501	179.552	213.624	232.711
ENSMUSG00000037188	6336.99	3149.71	1.0047	4.4772e-33	1.263e-31	Grhl3	chr4	-	135541888	135573630	2789	protein_coding	grainyhead-like_3_(Drosophila)	6848	7075	6912	2679	2823	3228	123.768	123.256	123.81	48.4095	52.1751	59.145
ENSMUSG00000056498	1853.16	723.559	1.3472	4.7716e-33	1.3419e-31	Tmem154	chr3	+	84666192	84704575	3342	protein_coding	transmembrane_protein_154	1838	2029	2234	607	611	789	27.7224	29.4989	33.3948	9.15354	9.42401	12.0643
ENSMUSG00000045287	329.625	66.8563	2.2529	5.0401e-33	1.4152e-31	Rtn4rl1	chr11	+	75193783	75267769	3525	protein_coding	reticulon_4_receptor-like_1	358	346	380	73	53	60	5.11936	4.76921	5.38551	1.04369	0.775029	0.869811
ENSMUSG00000057899	807.567	288.591	1.4721	7.7239e-33	2.1486e-31	Gpr111	chr17	-	42708936	42742179	3284	protein_coding	G_protein-coupled_receptor_111	829	978	849	259	263	278	12.7246	14.4699	12.9154	3.97469	4.12813	4.32588
ENSMUSG00000004865	4468.86	2214.18	1.0089	7.9337e-33	2.2035e-31	Srpk1	chr17	-	28587648	28622521	4956	protein_coding	serine/arginine-rich_protein_specific_kinase_1	4821	4606	5272	2087	1827	2235	49.0341	45.1567	53.143	21.2226	19.0024	23.0451
ENSMUSG00000017760	2483.76	1209.5	1.0337	8.4288e-33	2.3374e-31	Ctsa	chr2	+	164832873	164841032	3674	protein_coding	cathepsin_A	2696	2682	2789	1077	1051	1227	36.989	35.469	37.9238	14.7735	14.7457	17.0663
ENSMUSG00000027276	9884.63	4645.45	1.0842	8.4783e-33	2.3475e-31	Jag1	chr2	-	137081456	137116644	5612	protein_coding	jagged_1	11001	11333	10146	4329	3696	4881	98.8113	98.1199	90.3191	38.8756	33.9481	44.4451
ENSMUSG00000031667	1509.98	652.713	1.2037	1.2174e-32	3.3603e-31	Aktip	chr8	-	91112041	91134465	2153	protein_coding	thymoma_viral_proto-oncogene_1_interacting_protein	1551	1702	1715	555	631	621	36.3128	38.4101	39.7944	12.9914	15.1073	14.7394
ENSMUSG00000052539	559.741	172.673	1.6763	1.7918e-32	4.9307e-31	Magi3	chr3	-	104013259	104220374	6640	protein_coding	membrane_associated_guanylate_kinase_WW_and_PDZ_domain_containing_3	606	644	590	174	138	168	4.60041	4.71246	4.43901	1.32065	1.0713	1.29293
ENSMUSG00000022838	264.433	44.6626	2.4986	3.6887e-32	1.0073e-30	Eaf2	chr16	-	36792884	36875003	2377	protein_coding	ELL_associated_factor_2	272	298	300	41	37	46	5.76809	6.0914	6.30513	0.869283	0.802368	0.988921
ENSMUSG00000030717	397.139	83.9723	2.1937	1.04e-31	2.8145e-30	Nupr1	chr7	-	126623249	126630861	2449	protein_coding	nuclear_protein_transcription_regulator_1	475	419	410	101	63	70	9.7768	8.31295	8.36368	2.07845	1.32603	1.46064
ENSMUSG00000072572	219.284	22.1529	3.1568	1.1447e-31	3.0839e-30	Slc39a2	chr14	+	51892889	51896745	2508	protein_coding	solute_carrier_family_39_(zinc_transporter)_member_2	217	237	268	31	13	18	4.36138	4.59146	5.33838	0.622932	0.267188	0.366757
ENSMUSG00000069255	1235.6	557.14	1.143	2.7018e-31	7.1923e-30	Dusp22	chr13	+	30659999	30711231	1161	protein_coding	dual_specificity_phosphatase_22	1318	1328	1418	538	515	492	57.2236	55.5771	61.0164	23.3538	22.8653	21.6554
ENSMUSG00000019853	2225.02	965.73	1.1971	5.9514e-31	1.5634e-29	Hebp2	chr10	-	18540123	18546076	1910	protein_coding	heme_binding_protein_2	2137	2332	2861	890	894	893	56.3979	59.3232	74.8319	23.4835	24.1271	23.8919
ENSMUSG00000023827	1191.75	504.678	1.2316	6.1916e-31	1.6241e-29	Agpat4	chr17	+	12118704	12219645	1915	protein_coding	1-acylglycerol-3-phosphate_O-acyltransferase_4_(lysophosphatidic_acid_acyltransferase_delta)	1270	1204	1447	487	434	480	33.4293	30.5483	37.7487	12.8164	11.6821	12.8087
ENSMUSG00000027199	270.193	37.2617	2.7585	6.3835e-31	1.6696e-29	Gatm	chr2	-	122594467	122611303	2389	protein_coding	glycine_amidinotransferase_(L-arginine:glycine_amidinotransferase)	328	282	277	50	27	27	6.92069	5.73539	5.7925	1.05478	0.582571	0.577538
ENSMUSG00000097558	467.251	139.196	1.725	8.8208e-31	2.2922e-29	Gm26902	chr19	+	34474808	34481546	3100	lincRNA	predicted_gene_26902	523	483	530	129	126	131	8.50417	7.57034	8.54115	2.09718	2.09512	2.15945
ENSMUSG00000024621	916.609	247.309	1.8609	9.5645e-31	2.4727e-29	Csf1r	chr18	+	61105572	61132149	4701	protein_coding	colony_stimulating_factor_1_receptor	1200	829	978	288	206	194	12.8672	8.56829	10.3932	3.08751	2.2588	2.10884
ENSMUSG00000052572	944.21	344.076	1.4442	1.0475e-30	2.7043e-29	Dlg2	chr7	+	91090706	92447003	5278	protein_coding	discs_large_homolog_2_(Drosophila)	1093	1060	948	297	347	308	10.4386	9.75812	8.97307	2.83592	3.38892	2.98205
ENSMUSG00000052336	355.512	68.2145	2.3226	1.9871e-30	5.1152e-29	Cx3cr1	chr9	-	119901616	120068283	3729	protein_coding	chemokine_(C-X3-C_motif)_receptor_1	457	366	343	74	49	67	6.17754	4.7689	4.5952	1.00011	0.677337	0.918154
ENSMUSG00000046056	16158.4	7834.17	1.0396	2.0276e-30	5.212e-29	Sbsn	chr7	+	30734739	30756134	2460	protein_coding	suprabasin	19240	17024	16796	6615	7255	7832	394.241	336.245	341.093	135.519	152.021	162.694
ENSMUSG00000028581	476.102	111.565	2.0535	3.6977e-30	9.4373e-29	Laptm5	chr4	+	130913125	130936141	2600	protein_coding	lysosomal-associated_protein_transmembrane_5	584	476	503	130	101	79	11.3222	8.89536	9.66489	2.51986	2.00239	1.5527
ENSMUSG00000001062	1369.12	587.43	1.2128	4.8546e-30	1.2302e-28	Vps9d1	chr8	-	123242356	123254348	3233	protein_coding	VPS9_domain_containing_1	1386	1442	1679	547	489	595	21.6097	21.6715	25.9446	8.52684	7.79658	9.40469
ENSMUSG00000030020	171.188	9.63182	3.8429	5.023e-30	1.2711e-28	Prickle2	chr6	-	92370892	92706145	7860	protein_coding	prickle_homolog_2_(Drosophila)	172	220	171	16	6	5	1.10306	1.35997	1.08687	0.10259	0.0393486	0.0325073
ENSMUSG00000040016	968.384	46.5706	4.0381	5.5111e-30	1.3907e-28	Ptger3	chr3	+	157566892	157644758	2097	protein_coding	prostaglandin_E_receptor_3_(subtype_EP3)	966	1119	1102	25	36	68	23.2205	25.9275	26.2534	0.600825	0.884922	1.65708
ENSMUSG00000029755	1513.02	455.276	1.7109	4.8185e-29	1.1958e-27	Dlx5	chr6	-	6877805	6882085	1423	protein_coding	distal-less_homeobox_5	1581	1624	1773	315	543	396	56.004	55.4512	62.2452	11.1561	19.6696	14.2208
ENSMUSG00000028392	2322.32	1095.3	1.0788	8.5562e-29	2.1116e-27	Bspry	chr4	+	62480053	62497298	2167	protein_coding	B-box_and_SPRY_domain_containing	2500	2650	2485	907	1031	1095	58.1531	59.4178	57.2888	21.0938	24.5245	25.8219
ENSMUSG00000030994	248.099	44.4534	2.4146	9.3602e-29	2.3069e-27	D7Ertd443e	chr7	-	134266262	134385661	2559	protein_coding	DNA_segment_Chr_7_ERATO_Doi_443_expressed	265	267	284	35	43	45	5.21996	5.06957	5.54435	0.689294	0.866162	0.898618
ENSMUSG00000026458	414.188	101.091	1.9942	1.2605e-28	3.0813e-27	Ppfia4	chr1	-	134296783	134332928	6067	protein_coding	protein_tyrosine_phosphatase_receptor_type_f_polypeptide_(PTPRF)_interacting_protein_(liprin)_alpha_4	425	450	488	115	66	101	3.53107	3.60386	4.01835	0.95528	0.560752	0.850708
ENSMUSG00000015536	1370.1	595.281	1.1954	1.3588e-28	3.317e-27	Mocs2	chr13	+	114818236	114832275	4559	protein_coding	molybdenum_cofactor_synthesis_2	1335	1484	1693	540	571	538	14.7606	15.8159	18.552	5.9694	6.45606	6.03039
ENSMUSG00000052187	136.67	0.349667	5.7948	1.3923e-28	3.3942e-27	Hbb-y	chr7	-	103851745	103853240	661	protein_coding	hemoglobin_Y_beta-like_embryonic_chain	182	138	128	1	0	0	13.8791	10.144	9.6741	0.0762439	0	0
ENSMUSG00000057933	847.83	235.5	1.8208	2.2813e-28	5.5388e-27	Gsta2	chr9	-	78331018	78355788	870	protein_coding	glutathione_S-transferase_alpha_2_(Yc2)	954	1000	831	154	247	249	55.274	55.8484	47.7182	8.92089	14.6345	14.6256
ENSMUSG00000036887	455.155	103.751	2.0872	2.578e-28	6.2507e-27	C1qa	chr4	-	136895917	136898803	1040	protein_coding	complement_component_1_q_subcomponent_alpha_polypeptide	584	459	450	126	81	82	28.3055	21.4442	21.6163	6.10582	4.0147	4.02915
ENSMUSG00000011034	179.891	18.3474	3.1273	1.5921e-27	3.7586e-26	Slc5a1	chr5	+	33104219	33162872	4106	protein_coding	solute_carrier_family_5_(sodium/glucose_cotransporter)_member_1	217	162	212	21	16	14	2.66399	1.91702	2.5794	0.257755	0.200864	0.174238
ENSMUSG00000036832	133.175	3.55504	4.5535	1.6225e-27	3.8253e-26	Lpar3	chr3	+	146220961	146286214	2494	protein_coding	lysophosphatidic_acid_receptor_3	158	163	116	5	1	4	3.19339	3.17556	2.32361	0.101037	0.0206683	0.081959
ENSMUSG00000067594	31197	796.878	4.6589	2.368e-27	5.5466e-26	Krt77	chr15	-	101858732	101869705	2930	protein_coding	keratin_77	36380	32142	33967	479	497	1238	625.874	533.01	579.151	8.239	8.74359	21.5917
ENSMUSG00000021009	929.485	410.485	1.171	2.8826e-27	6.7343e-26	Ptpn21	chr12	-	98676741	98737405	5697	protein_coding	protein_tyrosine_phosphatase_non-receptor_type_21	971	1006	1081	403	346	391	8.59142	8.57989	9.47942	3.56505	3.13062	3.50722
ENSMUSG00000029503	163.13	16.5662	3.1315	3.2929e-27	7.663e-26	P2rx2	chr5	-	110339812	110343035	1919	protein_coding	purinergic_receptor_P2X_ligand-gated_ion_channel_2	160	188	189	16	14	16	4.20278	4.76006	4.92027	0.420196	0.376057	0.426067
ENSMUSG00000015093	886.783	372.859	1.2404	4.9241e-27	1.1415e-25	Clic3	chr2	+	25456838	25458776	918	protein_coding	chloride_intracellular_channel_3	948	928	1041	342	313	380	52.0544	49.1174	56.6514	18.7754	17.5753	21.1531
ENSMUSG00000078485	3504.98	1401.35	1.3113	5.5186e-27	1.2743e-25	Plekhn1	chr4	-	156221456	156228542	2210	protein_coding	pleckstrin_homology_domain_containing_family_N_member_1	3663	3212	4665	1375	1068	1454	83.5481	70.6176	105.454	31.3557	24.9104	33.6206
ENSMUSG00000035239	362.214	76.2502	2.1977	6.0407e-27	1.3877e-25	Neu3	chr7	-	99811439	99828417	3341	protein_coding	neuraminidase_3	379	369	444	50	90	70	5.71814	5.36636	6.63909	0.754224	1.38857	1.07067
ENSMUSG00000092586	1252.19	493.144	1.333	6.1226e-27	1.4048e-25	Ly6g6c	chr17	+	35065388	35070050	962	protein_coding	lymphocyte_antigen_6_complex_locus_G6C	1451	1166	1499	413	457	496	76.0299	58.8916	77.8447	21.6362	24.4874	26.3475
ENSMUSG00000025993	580.459	126.617	2.1445	7.0283e-27	1.6044e-25	Slc40a1	chr1	-	45908068	45926523	3928	protein_coding	solute_carrier_family_40_(iron-regulated_transporter)_member_1	651	606	651	175	103	75	8.35413	7.49602	8.27965	2.24529	1.35166	0.975715
ENSMUSG00000025232	321.923	62.9891	2.2931	1.0752e-26	2.4388e-25	Hexa	chr9	+	59539667	59565105	1865	protein_coding	hexosaminidase_A	398	302	357	59	72	43	10.7571	7.86788	9.56294	1.59434	1.99001	1.17821
ENSMUSG00000040389	2178.51	1038.86	1.0628	2.0777e-26	4.6481e-25	Wdr47	chr3	+	108591279	108645719	4222	protein_coding	WD_repeat_domain_47	2403	2457	2300	941	1056	878	28.6898	28.2759	27.2152	11.2325	12.8928	10.627
ENSMUSG00000036905	554.499	124.743	2.1026	2.0936e-26	4.6778e-25	C1qb	chr4	-	136880129	136886187	1088	protein_coding	complement_component_1_q_subcomponent_beta_polypeptide	715	473	632	154	109	84	33.126	21.1233	29.0195	7.13343	5.16415	3.94533
ENSMUSG00000035236	930.856	387.547	1.2533	2.3611e-26	5.2625e-25	Scai	chr2	-	39066214	39190730	10705	protein_coding	suppressor_of_cancer_cell_invasion	982	1079	1000	401	300	377	4.62399	4.89739	4.66676	1.88784	1.44456	1.79965
ENSMUSG00000036951	246.498	42.2993	2.4589	3.1755e-26	7.0513e-25	C130079G13Rik	chr3	+	59925214	59937949	2789	protein_coding	RIKEN_cDNA_C130079G13_gene	301	266	242	49	28	41	5.44014	4.63407	4.3348	0.88543	0.5175	0.751222
ENSMUSG00000050761	323.845	58.2767	2.3991	3.7993e-26	8.4157e-25	Gp1bb	chr16	-	18620319	18622403	1847	protein_coding	glycoprotein_Ib_beta_polypeptide	343	366	356	42	38	82	9.36093	9.62817	9.62909	1.14601	1.06052	2.26872
ENSMUSG00000001417	4104.77	1960.61	1.0598	4.6247e-26	1.0231e-24	Rhbg	chr3	-	88242874	88287210	1937	protein_coding	-	4472	4460	4564	1746	1540	2160	116.376	111.875	117.711	45.4278	40.9819	56.9846
ENSMUSG00000039063	206.772	32.4073	2.5789	5.6261e-26	1.2416e-24	Echdc3	chr2	-	6188465	6213033	1851	protein_coding	enoyl_Coenzyme_A_hydratase_domain_containing_3	226	212	242	37	30	23	6.15452	5.56492	6.53147	1.0074	0.835441	0.634972
ENSMUSG00000031536	1226.3	604.234	1.0159	1.0638e-25	2.3334e-24	Polb	chr8	-	22628119	22653437	1227	protein_coding	polymerase_(DNA_directed)_beta	1359	1324	1348	555	557	563	55.8299	52.4292	54.8842	22.7958	23.3998	23.4475
ENSMUSG00000055978	621.689	201.505	1.6026	1.5945e-25	3.4761e-24	Fut2	chr7	-	45648595	45666308	2865	protein_coding	fucosyltransferase_2	742	681	618	181	153	226	13.0548	11.5492	10.7762	3.18391	2.75276	4.03104
ENSMUSG00000021226	583.029	201.402	1.5162	2.0506e-25	4.4488e-24	Acot2	chr12	+	83987861	83993873	2196	protein_coding	acyl-CoA_thioesterase_2	671	653	591	167	205	185	15.4022	14.4481	13.4449	3.83258	4.81197	4.30499
ENSMUSG00000021567	208.712	22.5018	3.0398	5.4597e-25	1.1689e-23	Nkd2	chr13	-	73818534	73847631	4016	protein_coding	naked_cuticle_2_homolog_(Drosophila)	189	225	274	36	15	12	2.37225	2.72219	3.40847	0.451768	0.19253	0.152694
ENSMUSG00000074489	166.757	12.1477	3.4998	6.438e-25	1.3751e-23	Bglap3	chr3	-	88368616	88372743	2051	protein_coding	bone_gamma-carboxyglutamate_protein_3	162	193	194	9	3	22	3.98145	4.57216	4.7254	0.221148	0.0753974	0.548138
ENSMUSG00000042501	141.316	10.0895	3.5264	7.6296e-25	1.6219e-23	Cpa6	chr1	-	10324720	10719945	4752	protein_coding	carboxypeptidase_A6	114	184	168	10	9	9	1.20926	1.88136	1.76618	0.106055	0.0976264	0.096783
ENSMUSG00000005045	299.203	42.3102	2.7024	1.6434e-24	3.4446e-23	Chd5	chr4	+	152338651	152390194	9486	protein_coding	chromodomain_helicase_DNA_binding_protein_5	390	313	278	34	21	63	2.0724	1.60321	1.46408	0.180635	0.114114	0.339383
ENSMUSG00000036896	461.059	111.657	2.0001	1.6796e-24	3.5163e-23	C1qc	chr4	-	136889804	136893065	1203	protein_coding	complement_component_1_q_subcomponent_C_chain	628	445	438	125	104	81	26.3139	17.9731	18.1891	5.23662	4.45624	3.44074
ENSMUSG00000000708	1059.45	478.236	1.1391	1.864e-24	3.8934e-23	Kat2b	chr17	+	53566861	53672720	4653	protein_coding	K(lysine)_acetyltransferase_2B	1143	1208	1132	437	390	501	12.3824	12.6143	12.1539	4.7332	4.32049	5.50222
ENSMUSG00000047854	408.833	115.803	1.7881	2.0252e-24	4.2252e-23	Stx19	chr16	+	62814676	62824346	2812	protein_coding	syntaxin_19	447	519	377	110	109	102	8.0128	8.96771	6.69774	1.97144	1.99808	1.85361
ENSMUSG00000038642	226.504	43.1888	2.3171	2.8598e-24	5.9455e-23	Ctss	chr3	+	95526786	95556403	1355	protein_coding	cathepsin_S	273	214	257	44	36	40	10.1558	7.67369	9.47537	1.63652	1.36951	1.50853
ENSMUSG00000066440	1230.44	579.485	1.0794	4.1841e-24	8.6487e-23	Zfyve26	chr12	-	79232347	79296282	9368	protein_coding	zinc_finger_FYVE_domain_containing_26	1392	1282	1370	505	507	595	7.49004	6.64922	7.30594	2.71676	2.78973	3.24566
ENSMUSG00000058017	101.261	0.358055	5.4042	5.6241e-24	1.1467e-22	Serpinb3d	chr1	-	107078167	107083506	1216	protein_coding	serine_(or_cysteine)_peptidase_inhibitor_clade_B_(ovalbumin)_member_3D	101	134	98	0	0	1	4.18678	5.35428	4.02619	0	0	0.0420242
ENSMUSG00000003872	280.493	72.1088	1.9192	6.1737e-24	1.2559e-22	Lin7b	chr7	-	45367891	45370583	735	protein_coding	lin-7_homolog_B_(C._elegans)	287	310	326	64	63	73	19.6828	20.4929	22.1581	4.38833	4.41829	5.07538
ENSMUSG00000004730	283.813	54.1246	2.317	8.2838e-24	1.6737e-22	Emr1	chr17	+	57358686	57483529	3245	protein_coding	EGF-like_module_containing_mucin-like_hormone_receptor-like_sequence_1	369	269	293	60	56	34	5.73197	4.02779	4.51082	0.931844	0.889558	0.535423
ENSMUSG00000026073	124.059	6.86768	3.7837	1.9407e-23	3.8904e-22	Il1r2	chr1	+	40084768	40125219	1337	protein_coding	interleukin_1_receptor_type_II	99	171	139	6	7	6	3.73247	6.21433	5.1938	0.226166	0.269878	0.229326
ENSMUSG00000024887	694.14	260.008	1.4001	2.219e-23	4.4386e-22	Asah2	chr19	-	31984654	32061469	4682	protein_coding	N-acylsphingosine_amidohydrolase_2	868	697	713	243	215	264	9.34502	7.23321	7.60782	2.61566	2.36705	2.88141
ENSMUSG00000027186	993.476	29.7311	4.4029	3.0304e-23	6.0212e-22	Elf5	chr2	+	103411688	103450989	3262	protein_coding	E74-like_factor_5	1033	1192	1042	22	12	49	15.9628	17.7551	15.9583	0.339895	0.189626	0.767618
ENSMUSG00000030792	863.807	40.2832	3.9723	3.7292e-23	7.3852e-22	Dkkl1	chr7	-	45207525	45211883	903	protein_coding	dickkopf-like_1	946	930	964	16	41	54	52.8075	50.0409	53.3324	0.892974	2.34044	3.0559
ENSMUSG00000042244	128.209	8.65795	3.5609	1.0454e-22	2.0235e-21	Pglyrp3	chr3	+	92014583	92031582	1107	protein_coding	peptidoglycan_recognition_protein_3	112	126	185	6	7	11	5.09991	5.53035	8.34884	0.273156	0.32595	0.507783
ENSMUSG00000030428	202.192	36.3966	2.3873	1.1269e-22	2.1765e-21	Ttyh1	chr7	+	4119408	4136706	4353	protein_coding	tweety_homolog_1_(Drosophila)	237	221	206	29	29	43	2.74443	2.4668	2.36418	0.33575	0.343408	0.504792
ENSMUSG00000018427	234.05	53.9531	2.0609	1.5744e-22	3.0148e-21	Ypel2	chr11	-	86936425	86993707	4847	protein_coding	yippee-like_2_(Drosophila)	268	250	251	55	43	52	2.78711	2.50609	2.58704	0.571869	0.457295	0.548231
ENSMUSG00000040260	379.603	127.003	1.5557	1.5928e-22	3.0435e-21	Daam2	chr17	-	49456022	49564337	6045	protein_coding	dishevelled_associated_activator_of_morphogenesis_2	416	411	421	129	103	121	3.46888	3.30351	3.47927	1.07547	0.878298	1.02287
ENSMUSG00000020173	769.5	326.59	1.2261	1.7035e-22	3.2515e-21	Cobl	chr11	-	12236608	12464960	5615	protein_coding	cordon-bleu_WH2_repeat	850	869	810	268	314	322	7.63064	7.51969	7.20672	2.40542	2.88258	2.93048
ENSMUSG00000046814	122.99	3.62108	4.3526	1.8926e-22	3.6086e-21	Gchfr	chr2	+	119167773	119172390	645	protein_coding	GTP_cyclohydrolase_I_feedback_regulator	87	102	218	3	4	3	6.7991	7.6837	16.8849	0.234406	0.31967	0.237681
ENSMUSG00000006777	2589.76	114.288	4.007	5.1796e-22	9.7617e-21	Krt23	chr11	-	99477974	99493137	1565	protein_coding	keratin_23	2742	2711	3067	49	160	104	88.3172	84.1676	97.9043	1.57793	5.26995	3.39588
ENSMUSG00000032349	1364.64	650.231	1.0623	6.6088e-22	1.239e-20	Elovl5	chr9	+	77917364	77984519	2782	protein_coding	ELOVL_family_member_5_elongation_of_long_chain_fatty_acids_(yeast)	1408	1575	1506	545	562	696	25.5116	27.5076	27.0439	9.87293	10.4131	12.7845
ENSMUSG00000050808	3863.27	739.919	2.3035	1.3303e-21	2.4531e-20	Muc15	chr2	+	110721340	110739527	3421	protein_coding	mucin_15	4570	4497	3614	688	493	879	67.3372	63.8704	52.7761	10.1354	7.42839	13.1301
ENSMUSG00000079013	131.76	5.79351	3.9729	2.2763e-21	4.1717e-20	Serpina3j	chr12	+	104314553	104320725	2155	protein_coding	serine_(or_cysteine)_peptidase_inhibitor_clade_A_(alpha-1_antiproteinase_antitrypsin)_member_3J	149	74	211	6	7	3	3.48523	1.66845	4.89145	0.140317	0.167437	0.0711389
ENSMUSG00000020829	312.547	78.4212	1.9425	3.9591e-21	7.1825e-20	Slc46a1	chr11	+	78465697	78472059	1978	protein_coding	solute_carrier_family_46_member_1	347	361	319	99	51	69	8.84291	8.86769	8.05687	2.52241	1.32906	1.78261
ENSMUSG00000023992	114.524	7.47652	3.5586	5.7067e-21	1.026e-19	Trem2	chr17	+	48346401	48354147	4784	protein_coding	triggering_receptor_expressed_on_myeloid_cells_2	143	105	128	9	2	10	1.50673	1.06642	1.33666	0.0948108	0.0215496	0.106817
ENSMUSG00000035783	307.849	61.6326	2.2434	6.1306e-21	1.0989e-19	Acta2	chr19	-	34241090	34255336	1781	protein_coding	actin_alpha_2_smooth_muscle_aorta	286	363	365	77	64	30	8.09458	9.90313	10.2384	2.17888	1.85232	0.860776
ENSMUSG00000023918	580.781	208.975	1.4533	1.4297e-20	2.5273e-19	Gpr115	chr17	-	42656891	42692284	3060	protein_coding	G_protein-coupled_receptor_115	623	630	657	183	151	247	10.2626	10.0034	10.7262	3.01395	2.54365	4.12485
ENSMUSG00000029291	877.09	382.742	1.1854	1.9105e-20	3.3574e-19	Rufy3	chr5	+	88583574	88642671	3986	protein_coding	RUN_and_FYVE_domain_containing_3	861	959	1068	328	319	415	10.8882	11.6899	13.3855	4.14709	4.12529	5.32039
ENSMUSG00000032204	115.154	10.8797	3.161	2.1079e-20	3.697e-19	Aqp9	chr9	-	71110659	71168682	2765	protein_coding	aquaporin_9	117	125	137	9	13	8	2.13296	2.19657	2.4753	0.164042	0.242353	0.147852
ENSMUSG00000030782	474.837	168.594	1.4722	3.6817e-20	6.4008e-19	Tgfb1i1	chr7	+	128246812	128253712	3026	protein_coding	transforming_growth_factor_beta_1_induced_transcript_1	433	520	612	154	141	173	7.21292	8.34957	10.1038	2.56483	2.40188	2.92153
ENSMUSG00000054434	558.329	200.516	1.4552	4.1021e-20	7.1181e-19	Tmem120b	chr5	+	123068415	123117749	2164	protein_coding	transmembrane_protein_120B	574	559	705	194	143	221	13.3705	12.5512	16.2755	4.51805	3.40628	5.21877
ENSMUSG00000023826	157.037	22.5452	2.654	5.1389e-20	8.857e-19	Park2	chr17	+	10840384	12063361	4759	protein_coding	Parkinson_disease_(autosomal_recessive_juvenile)_2_parkin	177	174	165	23	11	29	1.87478	1.77649	1.73209	0.243567	0.119146	0.311398
ENSMUSG00000021236	709.616	336.593	1.0675	1.406e-19	2.3821e-18	Entpd5	chr12	-	84373857	84409029	4972	protein_coding	ectonucleoside_triphosphate_diphosphohydrolase_5	763	744	827	313	292	329	7.73545	7.27062	8.30953	3.17263	3.02728	3.38141
ENSMUSG00000044461	140.533	17.5999	2.8165	2.0693e-19	3.4764e-18	Shisa2	chr14	+	59625281	59631658	3144	protein_coding	shisa_family_member_2	150	166	146	13	10	26	2.40492	2.5654	2.31992	0.208385	0.163953	0.422594
ENSMUSG00000044349	198.44	25.3982	2.7965	2.4186e-19	4.0445e-18	Snhg11	chr2	+	158375638	158386145	5864	protein_coding	small_nucleolar_RNA_host_gene_11	206	143	305	13	27	30	1.77078	1.18487	2.59841	0.111726	0.23734	0.261433
ENSMUSG00000097572	124.808	10.7734	3.2405	2.6789e-19	4.4711e-18	Gm26797	chr9	-	122306130	122310928	3589	lincRNA	predicted_gene_26797	126	123	162	6	5	19	1.76966	1.66518	2.25499	0.0842528	0.0718121	0.270529
ENSMUSG00000047821	1648.64	753.151	1.1206	2.8494e-19	4.7468e-18	Trim16	chr11	+	62820231	62850808	3906	protein_coding	tripartite_motif-containing_16	1686	2029	1707	577	697	811	21.7579	25.2394	21.8325	7.44475	9.19817	10.6102
ENSMUSG00000006200	73.5473	0.716111	4.7737	3.7209e-19	6.1758e-18	Rhox6	chrX	+	37826910	37829857	1010	protein_coding	reproductive_homeobox_6	79	71	92	0	0	2	3.94274	3.4156	4.5506	0	0	0.101191
ENSMUSG00000021998	393.288	94.5156	1.995	9.1291e-19	1.4863e-17	Lcp1	chr14	+	75131101	75230842	3841	protein_coding	lymphocyte_cytosolic_protein_1	484	397	410	127	86	50	6.35174	5.02199	5.33263	1.66635	1.15413	0.66521
ENSMUSG00000030579	182.58	36.4364	2.2372	1.1632e-18	1.8768e-17	Tyrobp	chr7	+	30413788	30417577	564	protein_coding	TYRO_protein_tyrosine_kinase_binding_protein	237	169	193	36	35	30	21.1817	14.5592	17.0954	3.21684	3.19882	2.71816
ENSMUSG00000030638	165.428	23.8503	2.6442	1.3759e-18	2.2121e-17	Sh3gl3	chr7	+	82173840	82307419	2006	protein_coding	SH3-domain_GRB2-like_3	173	129	243	17	22	27	4.34718	3.12456	6.0517	0.427095	0.565318	0.687806
ENSMUSG00000029370	471.896	199.602	1.2275	1.8253e-18	2.9214e-17	Rassf6	chr5	-	90603076	90640487	1958	protein_coding	Ras_association_(RalGDS/AF-6)_domain_family_member_6	483	510	560	189	172	193	12.4344	12.6557	14.2882	4.8647	4.52811	5.03707
ENSMUSG00000002944	198.888	43.0881	2.1269	3.6814e-18	5.7687e-17	Cd36	chr5	-	17781690	17888959	3566	protein_coding	CD36_antigen	215	216	223	56	36	28	3.03913	2.94308	3.12411	0.791432	0.520382	0.401245
ENSMUSG00000021070	151.762	20.0183	2.7508	3.7535e-18	5.8766e-17	Bdkrb2	chr12	+	105563172	105593071	1680	protein_coding	bradykinin_receptor_beta_2	171	146	182	18	29	8	5.13073	4.22254	5.41208	0.53997	0.889795	0.24334
ENSMUSG00000068614	89.7547	4.26311	3.7923	4.6068e-18	7.1686e-17	Actc1	chr2	-	114047282	114053548	1473	protein_coding	actin_alpha_cardiac_muscle_1	78	98	120	4	0	8	2.66922	3.23261	4.06987	0.136856	0	0.277537
ENSMUSG00000022218	6629.37	1324.8	2.2327	5.3626e-18	8.316e-17	Tgm1	chr14	-	55700009	55713492	2852	protein_coding	transglutaminase_1_K_polypeptide	7030	7430	7342	835	1538	1276	124.25	126.581	128.608	14.7552	27.7976	22.863
ENSMUSG00000020263	565.381	255.354	1.1353	5.9833e-18	9.2544e-17	Appl2	chr10	-	83600033	83648738	3377	protein_coding	adaptor_protein_phosphotyrosine_interaction_PH_domain_and_leucine_zipper_containing_2	564	633	664	241	214	254	8.4186	9.10757	9.82289	3.5966	3.26651	3.84358
ENSMUSG00000029832	177.694	37.0201	2.1761	6.6541e-18	1.0257e-16	Nfe2l3	chr6	+	51432670	51458768	2544	protein_coding	nuclear_factor_erythroid_derived_2_like_3	220	195	168	42	30	31	4.35911	3.72432	3.29909	0.83203	0.607862	0.622698
ENSMUSG00000038422	235.485	68.7717	1.7329	1.5557e-17	2.3634e-16	Hdhd3	chr4	-	62499008	62503467	1205	protein_coding	haloacid_dehalogenase-like_hydrolase_domain_containing_3	240	256	279	62	55	74	10.0396	10.3224	11.567	2.59305	2.35275	3.13818
ENSMUSG00000020799	155.316	28.0806	2.3549	1.5643e-17	2.3746e-16	Tekt1	chr11	-	72344722	72362442	1447	protein_coding	tektin_1	164	162	185	21	20	37	5.71304	5.43972	6.38713	0.731404	0.712463	1.30667
ENSMUSG00000050211	358.021	14.1953	3.9644	1.621e-17	2.4586e-16	Pla2g4e	chr2	-	120166412	120245335	4477	protein_coding	phospholipase_A2_group_IVE	423	364	389	21	3	16	4.76261	3.95043	4.34075	0.236395	0.034541	0.182627
ENSMUSG00000021779	777.044	361.678	1.0932	1.7543e-17	2.6562e-16	Thrb	chr14	+	17660960	18038088	6081	protein_coding	thyroid_hormone_receptor_beta	916	888	747	327	344	331	7.59298	7.09525	6.13688	2.71006	2.91598	2.78154
ENSMUSG00000022265	1756	867.48	1.0097	1.9916e-17	3.0078e-16	Ank	chr15	+	27466677	27594909	3498	protein_coding	progressive_ankylosis	2098	1912	1755	721	908	769	30.2328	26.5581	25.0645	10.3878	13.3803	11.2341
ENSMUSG00000030137	112.068	10.6456	3.1157	3.3825e-17	5.0532e-16	Tuba8	chr6	+	121210734	121226854	2225	protein_coding	tubulin_alpha_8	111	120	138	4	18	7	2.51469	2.62048	3.0985	0.0906018	0.417007	0.160769
ENSMUSG00000018774	694.323	263.572	1.3745	3.9417e-17	5.8641e-16	Cd68	chr11	-	69664213	69666153	1230	protein_coding	CD68_antigen	833	778	668	285	170	280	34.1375	30.7329	27.1315	11.6774	7.12434	11.6328
ENSMUSG00000028186	82.6492	5.02045	3.5393	7.2787e-17	1.0722e-15	Uox	chr3	+	146597077	146632305	2737	protein_coding	urate_oxidase	83	94	95	3	2	9	1.5286	1.66872	1.73401	0.0552399	0.0376666	0.168035
ENSMUSG00000079260	793.272	380.271	1.0504	1.0455e-16	1.5313e-15	Tmppe	chr9	+	114401095	114411200	6855	protein_coding	transmembrane_protein_with_metallophosphoesterase_domain	918	777	912	372	300	385	6.75036	5.50736	6.64645	2.7349	2.25587	2.87003
ENSMUSG00000028701	287.308	99.6234	1.4981	1.3417e-16	1.9539e-15	Lurap1	chr4	-	116132406	116151338	5742	protein_coding	leucine_rich_adaptor_protein_1	311	294	340	100	78	99	2.73017	2.48779	2.95813	0.877695	0.700217	0.881059
ENSMUSG00000041301	358.48	16.1436	3.8226	1.4965e-16	2.1724e-15	Cftr	chr6	+	18170687	18322768	6410	protein_coding	cystic_fibrosis_transmembrane_conductance_regulator	436	427	313	10	7	28	3.42863	3.23668	2.43943	0.0786228	0.0562913	0.22322
ENSMUSG00000020475	383.977	152.489	1.3144	1.5621e-16	2.2635e-15	Pgam2	chr11	-	5801640	5803733	840	protein_coding	phosphoglycerate_mutase_2	380	432	452	128	150	144	22.8032	24.9882	26.882	7.67958	9.20477	8.76024
ENSMUSG00000019779	260.424	80.6641	1.6536	2.145e-16	3.0642e-15	Frk	chr10	+	34483400	34611226	4799	protein_coding	fyn-related_kinase	244	287	327	65	83	75	2.5629	2.90577	3.40408	0.682605	0.891514	0.798626
ENSMUSG00000033502	453.559	205.045	1.1324	6.2759e-16	8.7696e-15	Cdc14a	chr3	-	116272553	116424032	4577	protein_coding	CDC14_cell_division_cycle_14A	489	525	477	196	180	193	5.38542	5.57324	5.20643	2.15815	2.02718	2.15481
ENSMUSG00000021120	486.672	207.706	1.2135	1.1582e-15	1.5948e-14	Pigh	chr12	-	79080673	79089670	2349	protein_coding	phosphatidylinositol_glycan_anchor_biosynthesis_class_H	476	502	625	178	202	195	10.2145	10.3837	13.2923	3.81895	4.43271	4.24214
ENSMUSG00000018341	531.237	218.785	1.2619	1.4465e-15	1.9827e-14	Il12rb2	chr6	-	67291318	67376188	2998	protein_coding	interleukin_12_receptor_beta_2	475	603	673	186	183	238	7.98645	9.77272	11.2146	3.12671	3.14645	4.05675
ENSMUSG00000024354	177.827	45.137	1.9128	1.5472e-15	2.119e-14	Slc23a1	chr18	-	35614604	35627244	3026	protein_coding	solute_carrier_family_23_(nucleobase_transporters)_member_1	186	195	204	33	40	52	3.09839	3.13109	3.36793	0.549606	0.681384	0.878147
ENSMUSG00000044405	80.381	5.34531	3.4132	1.567e-15	2.143e-14	Adig	chr2	+	158502612	158508198	632	protein_coding	adipogenin	72	87	106	5	1	9	5.74258	6.68855	8.37898	0.398712	0.0815613	0.72771
ENSMUSG00000023912	722.995	340.416	1.0744	3.8678e-15	5.1634e-14	Slc25a27	chr17	-	43641900	43667015	2687	protein_coding	solute_carrier_family_25_member_27	720	800	860	328	249	370	13.5069	14.4661	15.9894	6.15195	4.77675	7.03667
ENSMUSG00000076617	61.3043	2.14798	3.8834	6.2636e-15	8.2755e-14	Ighm	chr12	-	113418950	113422730	1424	IG_C_gene	immunoglobulin_heavy_constant_mu	61	55	86	2	1	3	2.15929	1.87665	3.01711	0.0707826	0.0361985	0.107657
ENSMUSG00000055675	195.321	56.4263	1.7378	8.5203e-15	1.1134e-13	Kbtbd11	chr8	+	15011025	15033333	6973	protein_coding	kelch_repeat_and_BTB_(POZ)_domain_containing_11	187	237	219	57	42	58	1.3518	1.65142	1.56901	0.411966	0.310478	0.425051
ENSMUSG00000047115	263.571	98.3145	1.3958	1.0245e-14	1.3291e-13	Fam221a	chr6	+	49367739	49389905	2096	protein_coding	family_with_sequence_similarity_221_member_A	279	284	304	99	85	89	6.70973	6.5835	7.24577	2.3804	2.0904	2.16986
ENSMUSG00000018008	131.768	26.2564	2.2116	1.2297e-14	1.5862e-13	Cyth4	chr15	+	78597047	78622019	2791	protein_coding	cytohesin_4	158	115	160	27	21	25	2.85357	2.00202	2.86393	0.48754	0.387847	0.457734
ENSMUSG00000034459	104.357	9.21342	3.1381	1.2702e-14	1.6348e-13	Ifit1	chr19	+	34640871	34650009	2656	protein_coding	interferon-induced_protein_with_tetratricopeptide_repeats_1	100	96	148	4	18	3	1.89786	1.7562	2.78379	0.0758994	0.349338	0.05772
ENSMUSG00000059498	161.647	41.7726	1.882	2.2467e-14	2.8407e-13	Fcgr3	chr1	-	171051174	171064935	1347	protein_coding	Fc_receptor_IgG_low_affinity_III	190	165	176	46	38	32	7.11014	5.95177	6.52751	1.72106	1.45418	1.21399
ENSMUSG00000016356	276.43	85.9632	1.6395	2.2983e-14	2.9039e-13	Col20a1	chr2	+	180986535	181017540	4189	protein_coding	collagen_type_XX_alpha_1	272	247	392	81	65	93	3.27303	2.86495	4.67496	0.974499	0.799842	1.1345
ENSMUSG00000039620	223.643	72.1511	1.5916	2.5072e-14	3.1501e-13	6430573F11Rik	chr8	+	36457548	36514320	3570	protein_coding	RIKEN_cDNA_6430573F11_gene	224	257	255	57	62	81	3.1628	3.4978	3.56841	0.804662	0.895209	1.15944
ENSMUSG00000070985	73.42	5.81832	3.2226	2.9027e-14	3.6243e-13	Acnat1	chr4	-	49447105	49473912	1499	protein_coding	acyl-coenzyme_A_amino_acid_N-acyltransferase_1	69	73	100	5	8	3	2.32027	2.3662	3.33273	0.168103	0.275099	0.102271
ENSMUSG00000000982	114.004	19.5369	2.3941	2.9139e-14	3.6357e-13	Ccl3	chr11	-	83647844	83649355	766	protein_coding	chemokine_(C-C_motif)_ligand_3	145	116	113	19	22	13	9.54182	7.35799	7.36974	1.25006	1.48045	0.867257
ENSMUSG00000058715	215.324	54.2098	1.9132	3.6387e-14	4.5025e-13	Fcer1g	chr1	-	171229572	171234365	674	protein_coding	Fc_receptor_IgE_high_affinity_I_gamma_polypeptide	287	205	214	71	45	35	21.4642	14.7783	15.8619	5.30891	3.44155	2.65363
ENSMUSG00000036908	306.077	122.564	1.2976	6.5899e-14	8.016e-13	Unc93b1	chr19	+	3935186	3949340	2266	protein_coding	unc-93_homolog_B1_(C._elegans)	353	296	357	115	109	116	7.85248	6.3469	7.87065	2.55767	2.47952	2.61596
ENSMUSG00000026321	107.279	17.1224	2.4778	6.7415e-14	8.1893e-13	Tnfrsf11a	chr1	+	105780718	105847981	5027	protein_coding	tumor_necrosis_factor_receptor_superfamily_member_11a_NFKB_activator	107	128	118	10	23	14	1.07292	1.23717	1.17267	0.100253	0.235841	0.142315
ENSMUSG00000086522	54.3107	1.78992	3.8525	6.958e-14	8.4465e-13	Gm4473	chr10	+	120899157	120901888	657	antisense	predicted_gene_4473	52	52	75	2	1	2	3.98961	3.84563	5.70293	0.153416	0.0784577	0.15556
ENSMUSG00000050503	265.977	79.9043	1.683	8.5941e-14	1.0335e-12	Fbxl22	chr9	-	66508459	66514593	3935	protein_coding	F-box_and_leucine-rich_repeat_protein_22	284	340	250	62	57	103	3.63802	4.19821	3.17393	0.794061	0.746674	1.3376
ENSMUSG00000074625	127.011	17.5167	2.6306	1.3229e-13	1.5698e-12	Arhgap40	chr2	+	158512796	158550762	2162	protein_coding	Rho_GTPase_activating_protein_40	92	119	209	19	8	22	2.14498	2.67437	4.8294	0.442899	0.190737	0.519996
ENSMUSG00000018800	320.117	121.465	1.3701	1.3737e-13	1.6258e-12	Abca5	chr11	-	110269369	110337716	8231	protein_coding	ATP-binding_cassette_sub-family_A_(ABC1)_member_5	397	368	285	118	109	110	2.43125	2.17233	1.72979	0.722497	0.682614	0.682925
ENSMUSG00000074063	188.688	49.6387	1.8568	1.9005e-13	2.2272e-12	Osgin1	chr8	+	119434124	119446256	2302	protein_coding	oxidative_stress_induced_growth_inhibitor_1	228	229	162	34	53	50	4.99254	4.83348	3.5157	0.744355	1.18678	1.10994
[truncated: 238 more rows]

## Sheet: Spinous_signature
Gene_ID	S14	S16	log2FoldChange	pvalue	padj	GeneName	Chrom	Strand	Start	End	GeneLength	GeneType	GeneDescription	E14_5I_1_readcount	E14_5I_2_readcount	E14_5I_3_readcount	E16_5Sp1_readcount	E16_5Sp2_readcount	E16_5Sp3_readcount	E14_5I_1_fpkm	E14_5I_2_fpkm	E14_5I_3_fpkm	E16_5Sp1_fpkm	E16_5Sp2_fpkm	E16_5Sp3_fpkm
[truncated: 163 more rows]

[truncated: 1 more sheets: Granular_signature]
